# Supplementary material for: Phosphonate-modified metal oxides for the highly selective enrichment of phosphopeptides
Source: Royal Society of Chemistry journal article supplement (doi:10.1039/c4ra13878c), 2014-12-19
Supplement: c4ra13878c1.xlsx [file c4ra13878c1.xlsx]

## Sheet: ZrO2
N	Unused	Total	%Cov	%Cov(50)	%Cov(95)	Accessions	Names	Used	Annotation	Contrib	Conf	Sequence	Modifications	Cleavages	dMass	Prec MW	Prec m/z	Theor MW	Theor m/z	Theor z	Sc	Spectrum	Specific	Time	PrecursorSignal	PrecursorElution
1	87.2	87.2	28.72	26.79	25.71	sp|P35579|MYH9_HUMAN	Myosin-9 OS=Homo sapiens GN=MYH9 PE=1 SV=4			2	99	ALEQQVEEMK			-0.0027035	1203.58	602.796	1203.58	602.798	2	10	1.1.1.2270.10	1	37.8527	5834.69	37.8837
1	87.2	87.2	28.72	26.79	25.71	sp|P35579|MYH9_HUMAN	Myosin-9 OS=Homo sapiens GN=MYH9 PE=1 SV=4			2	99	ANLQIDQINTDLNLER			-0.00314651	1868.96	935.485	1868.96	935.487	2	15	1.1.1.2937.13	1	65.9156	2818.67	65.776
1	87.2	87.2	28.72	26.79	25.71	sp|P35579|MYH9_HUMAN	Myosin-9 OS=Homo sapiens GN=MYH9 PE=1 SV=4			2	99	DELADEIANSSGK	Deamidated(N)@9		-0.00239828	1348.6	675.306	1348.6	675.307	2	13	1.1.1.2248.21	1	36.9386	5059.12	37.171
1	87.2	87.2	28.72	26.79	25.71	sp|P35579|MYH9_HUMAN	Myosin-9 OS=Homo sapiens GN=MYH9 PE=1 SV=4			2	99	DFSALESQLQDTQELLQEENR			-0.0109237	2492.16	1247.09	2492.17	1247.09	2	16	1.1.1.3296.12	1	81.1254	649.296	81.0892
1	87.2	87.2	28.72	26.79	25.71	sp|P35579|MYH9_HUMAN	Myosin-9 OS=Homo sapiens GN=MYH9 PE=1 SV=4			2	99	DLEAHIDSANK			-0.000924272	1211.58	606.796	1211.58	606.796	2	18	1.1.1.1942.17	1	24.1338	31676.7	24.201
1	87.2	87.2	28.72	26.79	25.71	sp|P35579|MYH9_HUMAN	Myosin-9 OS=Homo sapiens GN=MYH9 PE=1 SV=4			2	99	DLGEELEALK			-0.000252248	1115.57	558.793	1115.57	558.793	2	10	1.1.1.2958.2	1	66.791	4517.62	66.6158
1	87.2	87.2	28.72	26.79	25.71	sp|P35579|MYH9_HUMAN	Myosin-9 OS=Homo sapiens GN=MYH9 PE=1 SV=4			2	99	DMFQETMEAMR			0.00148064	1387.56	694.787	1387.56	694.786	2	9	1.1.1.3097.3	1	72.665	422.165	72.6593
1	87.2	87.2	28.72	26.79	25.71	sp|P35579|MYH9_HUMAN	Myosin-9 OS=Homo sapiens GN=MYH9 PE=1 SV=4			2	99	DVLLQVDDER			-0.000561727	1200.6	601.306	1200.6	601.307	2	10	1.1.1.2444.6	1	45.159	1811.42	45.2771
1	87.2	87.2	28.72	26.79	25.71	sp|P35579|MYH9_HUMAN	Myosin-9 OS=Homo sapiens GN=MYH9 PE=1 SV=4			2	99	DVLLQVDDERR		missed R-R@10	8.33226e-05	1356.7	679.357	1356.7	679.357	2	14	1.1.1.2269.11	1	37.8117	8859.01	37.8
1	87.2	87.2	28.72	26.79	25.71	sp|P35579|MYH9_HUMAN	Myosin-9 OS=Homo sapiens GN=MYH9 PE=1 SV=4			2	99	EDQSILCTGESGAGK	Carbamidomethyl(C)@7		0.00147074	1550.69	776.352	1550.69	776.351	2	14	1.1.1.2156.27	0	33.0815	19225.7	32.8874
1	87.2	87.2	28.72	26.79	25.71	sp|P35579|MYH9_HUMAN	Myosin-9 OS=Homo sapiens GN=MYH9 PE=1 SV=4			2	99	ELEDATETADAMNR	Oxidation(M)@12		-0.000746877	1580.66	791.338	1580.66	791.339	2	19	1.1.1.1950.29	1	24.4819	31972	24.4104
1	87.2	87.2	28.72	26.79	25.71	sp|P35579|MYH9_HUMAN	Myosin-9 OS=Homo sapiens GN=MYH9 PE=1 SV=4			2	99	ELESQISELQEDLESER			-0.000480331	2032.94	1017.48	2032.94	1017.48	2	19	1.1.1.3129.25	1	74.0436	90555.8	74.1469
1	87.2	87.2	28.72	26.79	25.71	sp|P35579|MYH9_HUMAN	Myosin-9 OS=Homo sapiens GN=MYH9 PE=1 SV=4			2	99	EMEAELEDER			0.00209189	1249.52	625.765	1249.51	625.764	2	14	1.1.1.2154.13	1	32.9855	82631.3	33.0139
1	87.2	87.2	28.72	26.79	25.71	sp|P35579|MYH9_HUMAN	Myosin-9 OS=Homo sapiens GN=MYH9 PE=1 SV=4			2	99	EMEAELEDERK		missed R-K@10	-0.00203034	1377.61	689.81	1377.61	689.811	2	17	1.1.1.1963.26	1	25.0214	94806.5	24.997
1	87.2	87.2	28.72	26.79	25.71	sp|P35579|MYH9_HUMAN	Myosin-9 OS=Homo sapiens GN=MYH9 PE=1 SV=4			2	99	FDQLLAEEK			-0.00214037	1091.55	546.781	1091.55	546.782	2	9	1.1.1.2295.4	0	38.892	2204.78	38.9698
1	87.2	87.2	28.72	26.79	25.71	sp|P35579|MYH9_HUMAN	Myosin-9 OS=Homo sapiens GN=MYH9 PE=1 SV=4			2	99	GAGDGSDEEVDGKADGAEAKPAE	Phospho(S)@6	missed K-A@13	-0.000398184	2253.89	1127.95	2253.89	1127.95	2	12	1.1.1.1914.29	1	22.9838	767.668	22.9053
1	87.2	87.2	28.72	26.79	25.71	sp|P35579|MYH9_HUMAN	Myosin-9 OS=Homo sapiens GN=MYH9 PE=1 SV=4			2	99	HSQAVEELAEQLEQTK			0.00500579	1838.91	920.46	1838.9	920.458	2	17	1.1.1.2758.22	1	58.3793	2192.42	58.5267
1	87.2	87.2	28.72	26.79	25.71	sp|P35579|MYH9_HUMAN	Myosin-9 OS=Homo sapiens GN=MYH9 PE=1 SV=4			2	99	IAEFTTNLTEEEEK			-0.00161708	1652.78	827.395	1652.78	827.396	2	15	1.1.1.2529.27	1	48.7495	26446.9	48.4709
1	87.2	87.2	28.72	26.79	25.71	sp|P35579|MYH9_HUMAN	Myosin-9 OS=Homo sapiens GN=MYH9 PE=1 SV=4			2	99	IAQLEEELEEEQGNTELINDR			0.00158544	2471.17	1236.59	2471.17	1236.59	2	21	1.1.1.2992.40	1	68.2641	15174.3	67.8039
1	87.2	87.2	28.72	26.79	25.71	sp|P35579|MYH9_HUMAN	Myosin-9 OS=Homo sapiens GN=MYH9 PE=1 SV=4			2	99	IAQLEEQLDNETK			-0.0012503	1529.76	765.885	1529.76	765.886	2	14	1.1.1.2434.22	1	44.7525	41962.2	44.3098
1	87.2	87.2	28.72	26.79	25.71	sp|P35579|MYH9_HUMAN	Myosin-9 OS=Homo sapiens GN=MYH9 PE=1 SV=4			2	99	IAQLEEQLDNETKER		missed K-E@13	0.00331845	1814.9	605.975	1814.9	605.974	3	13	1.1.1.2384.6	1	42.6343	17824.1	42.7952
1	87.2	87.2	28.72	26.79	25.71	sp|P35579|MYH9_HUMAN	Myosin-9 OS=Homo sapiens GN=MYH9 PE=1 SV=4			2	99	IRELESQISELQEDLESER		missed R-E@2	0.00436039	2302.13	768.385	2302.13	768.384	3	18	1.1.1.3121.6	1	73.6885	8102.19	73.5951
1	87.2	87.2	28.72	26.79	25.71	sp|P35579|MYH9_HUMAN	Myosin-9 OS=Homo sapiens GN=MYH9 PE=1 SV=4			2	99	KGAGDGSDEEVDGKADGAEAKPAE	Phospho(S)@7	missed K-G@1; missed K-A@14	0.00399287	2381.99	795.004	2381.99	795.003	3	21	1.1.1.1837.29	1	19.7475	66145.8	19.4683
1	87.2	87.2	28.72	26.79	25.71	sp|P35579|MYH9_HUMAN	Myosin-9 OS=Homo sapiens GN=MYH9 PE=1 SV=4			2	99	KLEEEQIILEDQNCK	Carbamidomethyl(C)@14	missed K-L@1	0.00370353	1887.93	630.317	1887.92	630.316	3	11	1.1.1.2367.2	1	41.9153	3918.18	41.8276
1	87.2	87.2	28.72	26.79	25.71	sp|P35579|MYH9_HUMAN	Myosin-9 OS=Homo sapiens GN=MYH9 PE=1 SV=4			2	99	KLEGDSTDLSDQIAELQAQIAELK		missed K-L@1	0.00544502	2614.34	872.454	2614.33	872.452	3	17	1.1.1.3227.9	1	78.1901	32580.6	77.9692
1	87.2	87.2	28.72	26.79	25.71	sp|P35579|MYH9_HUMAN	Myosin-9 OS=Homo sapiens GN=MYH9 PE=1 SV=4			2	99	KQELEEICHDLEAR	Carbamidomethyl(C)@8	missed K-Q@1	0.00265291	1768.84	590.622	1768.84	590.621	3	13	1.1.1.2508.4	1	47.8457	10704.9	47.8398
1	87.2	87.2	28.72	26.79	25.71	sp|P35579|MYH9_HUMAN	Myosin-9 OS=Homo sapiens GN=MYH9 PE=1 SV=4			2	99	LEGDSTDLSDQIAELQAQIAELK			0.00218864	2486.24	1244.13	2486.24	1244.13	2	15	1.1.1.3263.33	1	79.7205	18823.1	79.3865
1	87.2	87.2	28.72	26.79	25.71	sp|P35579|MYH9_HUMAN	Myosin-9 OS=Homo sapiens GN=MYH9 PE=1 SV=4			2	99	LQVELDNVTGLLSQSDSK			-0.00320274	1945	973.506	1945	973.507	2	13	1.1.1.3117.20	1	73.5298	8029.98	73.6376
1	87.2	87.2	28.72	26.79	25.71	sp|P35579|MYH9_HUMAN	Myosin-9 OS=Homo sapiens GN=MYH9 PE=1 SV=4			2	99	MEDSVGCLETAEEVK	Carbamidomethyl(C)@7		-0.000747029	1695.73	848.874	1695.73	848.874	2	15	1.1.1.2485.25	1	46.8961	11964.1	46.9565
1	87.2	87.2	28.72	26.79	25.71	sp|P35579|MYH9_HUMAN	Myosin-9 OS=Homo sapiens GN=MYH9 PE=1 SV=4			2	99	MQQNIQELEEQLEEEESAR			-0.000640332	2332.05	1167.03	2332.05	1167.03	2	20	1.1.1.3074.36	1	71.7171	32049.6	71.642
1	87.2	87.2	28.72	26.79	25.71	sp|P35579|MYH9_HUMAN	Myosin-9 OS=Homo sapiens GN=MYH9 PE=1 SV=4			2	99	NTDQASMPDNTAAQK			-0.00304958	1590.69	796.353	1590.69	796.354	2	17	1.1.1.1787.13	1	17.6514	5051.86	17.4202
1	87.2	87.2	28.72	26.79	25.71	sp|P35579|MYH9_HUMAN	Myosin-9 OS=Homo sapiens GN=MYH9 PE=1 SV=4			2	99	QAQQERDELADEIANSSGK		missed R-D@6	0.00254701	2087.97	696.999	2087.97	696.998	3	14	1.1.1.2346.12	1	41.0472	17898.5	40.9093
1	87.2	87.2	28.72	26.79	25.71	sp|P35579|MYH9_HUMAN	Myosin-9 OS=Homo sapiens GN=MYH9 PE=1 SV=4			2	99	QLEEAEEEAQR			-0.00164629	1330.6	666.307	1330.6	666.307	2	17	1.1.1.1895.23	1	22.1729	132080	22.2348
1	87.2	87.2	28.72	26.79	25.71	sp|P35579|MYH9_HUMAN	Myosin-9 OS=Homo sapiens GN=MYH9 PE=1 SV=4			2	99	QTLENERGELANEVK	Gln->pyro-Glu@N-term	missed R-G@7	-0.00161203	1711.84	856.925	1711.84	856.926	2	17	1.1.1.2471.23	1	46.3069	18387.1	46.3692
1	87.2	87.2	28.72	26.79	25.71	sp|P35579|MYH9_HUMAN	Myosin-9 OS=Homo sapiens GN=MYH9 PE=1 SV=4			2	99	RQLEEAEEEAQR		missed R-Q@1	-0.00209147	1486.7	744.357	1486.7	744.358	2	19	1.1.1.1865.32	1	20.9233	15446.2	20.7674
1	87.2	87.2	28.72	26.79	25.71	sp|P35579|MYH9_HUMAN	Myosin-9 OS=Homo sapiens GN=MYH9 PE=1 SV=4			2	99	SMMQDREDQSILCTGESGAGK	Carbamidomethyl(C)@13	missed R-E@6	0.00085409	2298.99	767.337	2298.99	767.337	3	16	1.1.1.2367.12	1	41.9237	6109.93	41.9948
1	87.2	87.2	28.72	26.79	25.71	sp|P35579|MYH9_HUMAN	Myosin-9 OS=Homo sapiens GN=MYH9 PE=1 SV=4			2	99	TELEDTLDSTAAQQELR			-0.00181133	1918.91	960.462	1918.91	960.463	2	20	1.1.1.2701.25	1	55.9789	22717.6	56.0813
1	87.2	87.2	28.72	26.79	25.71	sp|P35579|MYH9_HUMAN	Myosin-9 OS=Homo sapiens GN=MYH9 PE=1 SV=4			2	99	TEMEDLMSSK			0.000177406	1169.49	585.755	1169.49	585.755	2	10	1.1.1.2397.3	1	43.1794	6389.87	43.2582
1	87.2	87.2	28.72	26.79	25.71	sp|P35579|MYH9_HUMAN	Myosin-9 OS=Homo sapiens GN=MYH9 PE=1 SV=4			2	99	TEMEDLMSSKDDVGK		missed K-D@10	-0.000164589	1683.73	842.874	1683.73	842.874	2	17	1.1.1.2417.26	1	44.039	24256.5	43.594
1	87.2	87.2	28.72	26.79	25.71	sp|P35579|MYH9_HUMAN	Myosin-9 OS=Homo sapiens GN=MYH9 PE=1 SV=4			2	99	TQLEELEDELQATEDAK			-0.000303483	1960.91	981.463	1960.91	981.463	2	24	1.1.1.3132.14	0	74.1615	235914	74.0621
1	87.2	87.2	28.72	26.79	25.71	sp|P35579|MYH9_HUMAN	Myosin-9 OS=Homo sapiens GN=MYH9 PE=1 SV=4			1.88606	98.66	DLQGRDEQSEEK		missed R-D@5	0.00247055	1432.65	717.33	1432.64	717.329	2	11	1.1.1.1601.4	1	10.0935	257.484	10.1531
1	87.2	87.2	28.72	26.79	25.71	sp|P35579|MYH9_HUMAN	Myosin-9 OS=Homo sapiens GN=MYH9 PE=1 SV=4			1.63827	97.65	DLEGLSQR			-0.00112753	916.46	459.237	916.461	459.238	2	8	1.1.1.2052.2	1	28.706	10095.4	28.7023
1	87.2	87.2	28.72	26.79	25.71	sp|P35579|MYH9_HUMAN	Myosin-9 OS=Homo sapiens GN=MYH9 PE=1 SV=4			1.4437	96.42	EQLEEEEEAKHNLEK		missed K-H@10	0.00377587	1853.87	618.963	1853.86	618.962	3	11	1.1.1.2023.12	1	27.5061	81875.5	27.4522
1	87.2	87.2	28.72	26.79	25.71	sp|P35579|MYH9_HUMAN	Myosin-9 OS=Homo sapiens GN=MYH9 PE=1 SV=4			0.716699	80.77	EDQSILCTGESGAGKTENTK	Carbamidomethyl(C)@7	missed K-T@15	0.0044427	2123.97	708.997	2123.96	708.995	3	10	1.1.1.2075.22	0	29.6776	4920.27	29.8246
1	87.2	87.2	28.72	26.79	25.71	sp|P35579|MYH9_HUMAN	Myosin-9 OS=Homo sapiens GN=MYH9 PE=1 SV=4			0.47237	66.34	EQADFAIEALAK			0.00621934	1304.67	653.341	1304.66	653.338	2	5	1.1.1.2775.6	0	59.0827	612.056	59.075
1	87.2	87.2	28.72	26.79	25.71	sp|P35579|MYH9_HUMAN	Myosin-9 OS=Homo sapiens GN=MYH9 PE=1 SV=4			0.454693	64.93	DLEGLSQRHEEK		missed R-H@8	-0.00845716	1439.69	720.853	1439.7	720.857	2	9	1.1.1.2413.18	1	43.8642	20464.8	44.0567
1	87.2	87.2	28.72	26.79	25.71	sp|P35579|MYH9_HUMAN	Myosin-9 OS=Homo sapiens GN=MYH9 PE=1 SV=4			0.289037	48.59	MEDSVGCLETAEEVKR	Carbamidomethyl(C)@7	missed K-R@15	0.00331637	1851.84	618.287	1851.83	618.285	3	8	1.1.1.2338.9	1	40.7099	3742.62	40.8257
1	87.2	87.2	28.72	26.79	25.71	sp|P35579|MYH9_HUMAN	Myosin-9 OS=Homo sapiens GN=MYH9 PE=1 SV=4			0.156767	30.31	SMMQDREDQSILCTGESGAGKTENTK	Carbamidomethyl(C)@13	missed R-E@6; missed K-T@21	0.0085152	2872.27	958.431	2872.26	958.429	3	9	1.1.1.2285.33	1	38.4997	998.783	38.5098
1	87.2	87.2	28.72	26.79	25.71	sp|P35579|MYH9_HUMAN	Myosin-9 OS=Homo sapiens GN=MYH9 PE=1 SV=4			0.106238	21.73	HEAMITDLEER			-0.000713811	1342.62	672.316	1342.62	672.317	2	8	1.1.1.2268.20	1	37.7774	2852.21	37.9258
1	87.2	87.2	28.72	26.79	25.71	sp|P35579|MYH9_HUMAN	Myosin-9 OS=Homo sapiens GN=MYH9 PE=1 SV=4			0.0352691	26.49	EQEVNILK	Deamidated(N)@5		0.000160833	972.513	487.264	972.513	487.264	2	5	1.1.1.2536.2	0	49.0234	6185.74	49.2289
1	87.2	87.2	28.72	26.79	25.71	sp|P35579|MYH9_HUMAN	Myosin-9 OS=Homo sapiens GN=MYH9 PE=1 SV=4			0	98.82	ALEQQVEEMK			-0.0027035	1203.58	602.796	1203.58	602.798	2	9	1.1.1.2278.8	1	38.1855	5834.69	37.8837
1	87.2	87.2	28.72	26.79	25.71	sp|P35579|MYH9_HUMAN	Myosin-9 OS=Homo sapiens GN=MYH9 PE=1 SV=4			0	99	ANLQIDQINTDLNLER			-0.00314651	1868.96	935.485	1868.96	935.487	2	13	1.1.1.2929.14	1	65.5799	1401.66	65.565
1	87.2	87.2	28.72	26.79	25.71	sp|P35579|MYH9_HUMAN	Myosin-9 OS=Homo sapiens GN=MYH9 PE=1 SV=4			0	92.66	ANLQIDQINTDLNLER			-0.00314651	1868.96	935.485	1868.96	935.487	2	9	1.1.1.2934.23	1	65.7979	2818.67	65.776
1	87.2	87.2	28.72	26.79	25.71	sp|P35579|MYH9_HUMAN	Myosin-9 OS=Homo sapiens GN=MYH9 PE=1 SV=4			0	99	DELADEIANSSGK			-0.000753884	1347.61	674.815	1347.62	674.815	2	15	1.1.1.2394.19	1	43.0669	23228.7	43.2162
1	87.2	87.2	28.72	26.79	25.71	sp|P35579|MYH9_HUMAN	Myosin-9 OS=Homo sapiens GN=MYH9 PE=1 SV=4			0	99	DELADEIANSSGK			-0.000753884	1347.61	674.815	1347.62	674.815	2	15	1.1.1.2402.12	1	43.3966	23228.7	43.2162
1	87.2	87.2	28.72	26.79	25.71	sp|P35579|MYH9_HUMAN	Myosin-9 OS=Homo sapiens GN=MYH9 PE=1 SV=4			0	99	DELADEIANSSGK	Deamidated(N)@9		-0.00258943	1348.6	675.306	1348.6	675.307	2	12	1.1.1.2438.11	0	44.9117	3244.79	44.8996
1	87.2	87.2	28.72	26.79	25.71	sp|P35579|MYH9_HUMAN	Myosin-9 OS=Homo sapiens GN=MYH9 PE=1 SV=4			0	99	DELADEIANSSGK			0.00534965	1347.62	674.818	1347.62	674.815	2	9	1.1.1.2514.13	1	48.1055	1484.75	48.0076
1	87.2	87.2	28.72	26.79	25.71	sp|P35579|MYH9_HUMAN	Myosin-9 OS=Homo sapiens GN=MYH9 PE=1 SV=4			0	99	DELADEIANSSGK	Deamidated(N)@9		-0.00239828	1348.6	675.306	1348.6	675.307	2	11	1.1.1.2260.21	1	37.4444	5059.12	37.171
1	87.2	87.2	28.72	26.79	25.71	sp|P35579|MYH9_HUMAN	Myosin-9 OS=Homo sapiens GN=MYH9 PE=1 SV=4			0	61.6	DELADEIANSSGK	Deamidated(N)@9		0.0072453	1348.61	675.311	1348.6	675.307	2	7	1.1.1.2268.22	1	37.779	2899.07	37.3399
1	87.2	87.2	28.72	26.79	25.71	sp|P35579|MYH9_HUMAN	Myosin-9 OS=Homo sapiens GN=MYH9 PE=1 SV=4			0	99	DFSALESQLQDTQELLQEENR			0.000795006	2492.17	1247.09	2492.17	1247.09	2	19	1.1.1.3217.41	1	77.7941	232706	77.4602
1	87.2	87.2	28.72	26.79	25.71	sp|P35579|MYH9_HUMAN	Myosin-9 OS=Homo sapiens GN=MYH9 PE=1 SV=4			0	99	DFSALESQLQDTQELLQEENR	Deamidated(Q)@17		0.0145805	2493.17	1247.59	2493.15	1247.58	2	15	1.1.1.3221.30	1	77.9641	70939.3	77.5026
1	87.2	87.2	28.72	26.79	25.71	sp|P35579|MYH9_HUMAN	Myosin-9 OS=Homo sapiens GN=MYH9 PE=1 SV=4			0	99	DFSALESQLQDTQELLQEENR			0.00177157	2492.17	1247.09	2492.17	1247.09	2	15	1.1.1.3235.26	1	78.5486	2847.97	78.4295
1	87.2	87.2	28.72	26.79	25.71	sp|P35579|MYH9_HUMAN	Myosin-9 OS=Homo sapiens GN=MYH9 PE=1 SV=4			0	99	DFSALESQLQDTQELLQEENR	Deamidated(Q)@10		0.00505908	2493.16	1247.59	2493.15	1247.58	2	17	1.1.1.3241.14	1	78.7994	3098.01	78.7632
1	87.2	87.2	28.72	26.79	25.71	sp|P35579|MYH9_HUMAN	Myosin-9 OS=Homo sapiens GN=MYH9 PE=1 SV=4			0	99	DFSALESQLQDTQELLQEENR			-0.0109237	2492.16	1247.09	2492.17	1247.09	2	14	1.1.1.3299.9	1	81.2488	649.296	81.0892
1	87.2	87.2	28.72	26.79	25.71	sp|P35579|MYH9_HUMAN	Myosin-9 OS=Homo sapiens GN=MYH9 PE=1 SV=4			0	99	DFSALESQLQDTQELLQEENR	Deamidated(Q)@17		0.0057915	2493.16	1247.59	2493.15	1247.58	2	14	1.1.1.3229.15	1	78.3001	13204.9	77.8419
1	87.2	87.2	28.72	26.79	25.71	sp|P35579|MYH9_HUMAN	Myosin-9 OS=Homo sapiens GN=MYH9 PE=1 SV=4			0	99	DFSALESQLQDTQELLQEENR			0.0035263	2492.17	1247.09	2492.17	1247.09	2	22	1.1.1.3209.30	1	77.4548	232706	77.4602
1	87.2	87.2	28.72	26.79	25.71	sp|P35579|MYH9_HUMAN	Myosin-9 OS=Homo sapiens GN=MYH9 PE=1 SV=4			0	99	DFSALESQLQDTQELLQEENR			0.00299227	2492.17	1247.09	2492.17	1247.09	2	8	1.1.1.3439.16	1	86.9416	216.615	86.9467
1	87.2	87.2	28.72	26.79	25.71	sp|P35579|MYH9_HUMAN	Myosin-9 OS=Homo sapiens GN=MYH9 PE=1 SV=4			0	96.35	DFSALESQLQDTQELLQEENR			-0.0126327	2492.15	1247.08	2492.17	1247.09	2	8	1.1.1.3513.24	1	90.0823	185.124	90.0024
1	87.2	87.2	28.72	26.79	25.71	sp|P35579|MYH9_HUMAN	Myosin-9 OS=Homo sapiens GN=MYH9 PE=1 SV=4			0	85.08	DFSALESQLQDTQELLQEENR			-0.00140226	2492.17	1247.09	2492.17	1247.09	2	7	1.1.1.3479.28	1	88.6355	169.72	88.6406
1	87.2	87.2	28.72	26.79	25.71	sp|P35579|MYH9_HUMAN	Myosin-9 OS=Homo sapiens GN=MYH9 PE=1 SV=4			0	20.73	DFSALESQLQDTQELLQEENR			0.00323641	2492.17	1247.09	2492.17	1247.09	2	9	1.1.1.3254.24	1	79.3395	1315.49	79.3446
1	87.2	87.2	28.72	26.79	25.71	sp|P35579|MYH9_HUMAN	Myosin-9 OS=Homo sapiens GN=MYH9 PE=1 SV=4			0	17.73	DFSALESQLQDTQELLQEENR	Deamidated(Q)@10		0.000420412	2493.15	1247.58	2493.15	1247.58	2	6	1.1.1.3305.41	1	81.4991	562.648	81.4193
1	87.2	87.2	28.72	26.79	25.71	sp|P35579|MYH9_HUMAN	Myosin-9 OS=Homo sapiens GN=MYH9 PE=1 SV=4			0	99	DLEAHIDSANK			-0.000924272	1211.58	606.796	1211.58	606.796	2	15	1.1.1.1950.12	1	24.4644	31676.7	24.201
1	87.2	87.2	28.72	26.79	25.71	sp|P35579|MYH9_HUMAN	Myosin-9 OS=Homo sapiens GN=MYH9 PE=1 SV=4			0	96.05	DLEGLSQR			-0.00112753	916.46	459.237	916.461	459.238	2	7	1.1.1.2044.2	0	28.3747	10023.5	28.7023
1	87.2	87.2	28.72	26.79	25.71	sp|P35579|MYH9_HUMAN	Myosin-9 OS=Homo sapiens GN=MYH9 PE=1 SV=4			0	93.2	DLEGLSQR			-0.00112753	916.46	459.237	916.461	459.238	2	6	1.1.1.2060.2	0	29.0378	10095.4	28.7023
1	87.2	87.2	28.72	26.79	25.71	sp|P35579|MYH9_HUMAN	Myosin-9 OS=Homo sapiens GN=MYH9 PE=1 SV=4			0	59.55	DLEGLSQRHEEK		missed R-H@8	-0.00906751	1439.69	720.853	1439.7	720.857	2	7	1.1.1.2405.22	1	43.5311	17654.2	43.9305
1	87.2	87.2	28.72	26.79	25.71	sp|P35579|MYH9_HUMAN	Myosin-9 OS=Homo sapiens GN=MYH9 PE=1 SV=4			0	99	DLGEELEALK			-0.000252248	1115.57	558.793	1115.57	558.793	2	9	1.1.1.2950.2	1	66.451	4517.62	66.6158
1	87.2	87.2	28.72	26.79	25.71	sp|P35579|MYH9_HUMAN	Myosin-9 OS=Homo sapiens GN=MYH9 PE=1 SV=4			0	81.1	DLQGRDEQSEEK		missed R-D@5	0.00124984	1432.64	717.329	1432.64	717.329	2	9	1.1.1.1615.5	1	10.6761	154.551	10.4809
1	87.2	87.2	28.72	26.79	25.71	sp|P35579|MYH9_HUMAN	Myosin-9 OS=Homo sapiens GN=MYH9 PE=1 SV=4			0	99	DVLLQVDDER			-0.000561727	1200.6	601.306	1200.6	601.307	2	8	1.1.1.2453.7	1	45.537	1811.42	45.2771
1	87.2	87.2	28.72	26.79	25.71	sp|P35579|MYH9_HUMAN	Myosin-9 OS=Homo sapiens GN=MYH9 PE=1 SV=4			0	51.46	DVLLQVDDERR		missed R-R@10	-0.00345673	1356.7	679.355	1356.7	679.357	2	6	1.1.1.2261.16	1	37.4821	1345.7	37.4662
1	87.2	87.2	28.72	26.79	25.71	sp|P35579|MYH9_HUMAN	Myosin-9 OS=Homo sapiens GN=MYH9 PE=1 SV=4			0	99	EDQSILCTGESGAGK	Carbamidomethyl(C)@7		0.00111323	1550.69	776.352	1550.69	776.351	2	16	1.1.1.2148.29	0	32.7462	19227.7	32.8874
1	87.2	87.2	28.72	26.79	25.71	sp|P35579|MYH9_HUMAN	Myosin-9 OS=Homo sapiens GN=MYH9 PE=1 SV=4			0	99	EDQSILCTGESGAGK	Carbamidomethyl(C)@7		-0.00145025	1550.69	776.351	1550.69	776.351	2	13	1.1.1.2140.25	0	32.4082	16596.5	32.8032
1	87.2	87.2	28.72	26.79	25.71	sp|P35579|MYH9_HUMAN	Myosin-9 OS=Homo sapiens GN=MYH9 PE=1 SV=4			0	32.06	EDQSILCTGESGAGK	Carbamidomethyl(C)@7		0.00171488	1550.69	776.352	1550.69	776.351	2	7	1.1.1.2164.27	0	33.4183	14655	32.9717
1	87.2	87.2	28.72	26.79	25.71	sp|P35579|MYH9_HUMAN	Myosin-9 OS=Homo sapiens GN=MYH9 PE=1 SV=4			0	99	ELEDATETADAMNR			-0.0003397	1564.67	783.341	1564.67	783.341	2	12	1.1.1.2199.28	1	34.883	1454.33	34.8148
1	87.2	87.2	28.72	26.79	25.71	sp|P35579|MYH9_HUMAN	Myosin-9 OS=Homo sapiens GN=MYH9 PE=1 SV=4			0	99	ELEDATETADAMNR			0.000636865	1564.67	783.341	1564.67	783.341	2	19	1.1.1.2225.25	1	35.9768	467067	36.2049
1	87.2	87.2	28.72	26.79	25.71	sp|P35579|MYH9_HUMAN	Myosin-9 OS=Homo sapiens GN=MYH9 PE=1 SV=4			0	99	ELEDATETADAMNR			0.000636865	1564.67	783.341	1564.67	783.341	2	20	1.1.1.2226.24	1	36.018	467067	36.2049
1	87.2	87.2	28.72	26.79	25.71	sp|P35579|MYH9_HUMAN	Myosin-9 OS=Homo sapiens GN=MYH9 PE=1 SV=4			0	99	ELEDATETADAMNR	Oxidation(M)@12		-0.00473334	1580.66	791.336	1580.66	791.339	2	17	1.1.1.2232.29	1	36.2733	10039.4	36.1631
1	87.2	87.2	28.72	26.79	25.71	sp|P35579|MYH9_HUMAN	Myosin-9 OS=Homo sapiens GN=MYH9 PE=1 SV=4			0	99	ELEDATETADAMNR			0.000636865	1564.67	783.341	1564.67	783.341	2	20	1.1.1.2234.19	1	36.3483	467067	36.2049
1	87.2	87.2	28.72	26.79	25.71	sp|P35579|MYH9_HUMAN	Myosin-9 OS=Homo sapiens GN=MYH9 PE=1 SV=4			0	99	ELEDATETADAMNR	Oxidation(M)@12		-0.00412299	1580.66	791.336	1580.66	791.339	2	16	1.1.1.2240.30	1	36.6089	10052.6	36.1631
1	87.2	87.2	28.72	26.79	25.71	sp|P35579|MYH9_HUMAN	Myosin-9 OS=Homo sapiens GN=MYH9 PE=1 SV=4			0	99	ELEDATETADAMNR			0.000514794	1564.67	783.341	1564.67	783.341	2	19	1.1.1.2242.23	1	36.6874	420616	36.2466
1	87.2	87.2	28.72	26.79	25.71	sp|P35579|MYH9_HUMAN	Myosin-9 OS=Homo sapiens GN=MYH9 PE=1 SV=4			0	99	ELEDATETADAMNR			-0.00204869	1564.67	783.34	1564.67	783.341	2	18	1.1.1.2250.24	1	37.0253	56186.2	36.5811
1	87.2	87.2	28.72	26.79	25.71	sp|P35579|MYH9_HUMAN	Myosin-9 OS=Homo sapiens GN=MYH9 PE=1 SV=4			0	99	ELEDATETADAMNR			-0.00192662	1564.67	783.34	1564.67	783.341	2	19	1.1.1.2258.27	1	37.3652	17111.4	36.9184
1	87.2	87.2	28.72	26.79	25.71	sp|P35579|MYH9_HUMAN	Myosin-9 OS=Homo sapiens GN=MYH9 PE=1 SV=4			0	99	ELEDATETADAMNR			-0.000705912	1564.67	783.341	1564.67	783.341	2	16	1.1.1.2266.27	1	37.6999	8225.54	37.2555
1	87.2	87.2	28.72	26.79	25.71	sp|P35579|MYH9_HUMAN	Myosin-9 OS=Homo sapiens GN=MYH9 PE=1 SV=4			0	99	ELEDATETADAMNR			0.00185757	1564.67	783.342	1564.67	783.341	2	14	1.1.1.2274.30	1	38.0369	3640.86	38.093
1	87.2	87.2	28.72	26.79	25.71	sp|P35579|MYH9_HUMAN	Myosin-9 OS=Homo sapiens GN=MYH9 PE=1 SV=4			0	99	ELEDATETADAMNR			0.00185757	1564.67	783.342	1564.67	783.341	2	14	1.1.1.2282.19	1	38.3613	3640.86	38.093
1	87.2	87.2	28.72	26.79	25.71	sp|P35579|MYH9_HUMAN	Myosin-9 OS=Homo sapiens GN=MYH9 PE=1 SV=4			0	99	ELEDATETADAMNR			0.00124722	1564.67	783.342	1564.67	783.341	2	15	1.1.1.2294.25	1	38.8677	3286.55	38.8026
1	87.2	87.2	28.72	26.79	25.71	sp|P35579|MYH9_HUMAN	Myosin-9 OS=Homo sapiens GN=MYH9 PE=1 SV=4			0	99	ELEDATETADAMNR			0.00246792	1564.67	783.342	1564.67	783.341	2	15	1.1.1.2302.24	1	39.2033	2998.97	39.1382
1	87.2	87.2	28.72	26.79	25.71	sp|P35579|MYH9_HUMAN	Myosin-9 OS=Homo sapiens GN=MYH9 PE=1 SV=4			0	99	ELEDATETADAMNR			0.00551969	1564.67	783.344	1564.67	783.341	2	14	1.1.1.2318.16	1	39.8714	1605.72	39.8552
1	87.2	87.2	28.72	26.79	25.71	sp|P35579|MYH9_HUMAN	Myosin-9 OS=Homo sapiens GN=MYH9 PE=1 SV=4			0	99	ELEDATETADAMNR			0.0105246	1564.68	783.346	1564.67	783.341	2	14	1.1.1.2335.22	1	40.5942	2473.71	40.5308
1	87.2	87.2	28.72	26.79	25.71	sp|P35579|MYH9_HUMAN	Myosin-9 OS=Homo sapiens GN=MYH9 PE=1 SV=4			0	99	ELEDATETADAMNR			0.00649626	1564.67	783.344	1564.67	783.341	2	11	1.1.1.2157.25	1	33.1218	1482.34	33.0561
1	87.2	87.2	28.72	26.79	25.71	sp|P35579|MYH9_HUMAN	Myosin-9 OS=Homo sapiens GN=MYH9 PE=1 SV=4			0	99	ELEDATETADAMNR			0.00526071	1564.67	783.344	1564.67	783.341	2	14	1.1.1.2075.30	1	29.6843	1638.12	29.6147
1	87.2	87.2	28.72	26.79	25.71	sp|P35579|MYH9_HUMAN	Myosin-9 OS=Homo sapiens GN=MYH9 PE=1 SV=4			0	99	ELEDATETADAMNR			-0.00168248	1564.67	783.34	1564.67	783.341	2	11	1.1.1.2310.22	1	39.5391	3168.26	39.2648
1	87.2	87.2	28.72	26.79	25.71	sp|P35579|MYH9_HUMAN	Myosin-9 OS=Homo sapiens GN=MYH9 PE=1 SV=4			0	99	ELEDATETADAMNR	Oxidation(M)@12		-0.00473334	1580.66	791.336	1580.66	791.339	2	15	1.1.1.2224.26	0	35.9355	10039.4	36.1631
1	87.2	87.2	28.72	26.79	25.71	sp|P35579|MYH9_HUMAN	Myosin-9 OS=Homo sapiens GN=MYH9 PE=1 SV=4			0	99	ELEDATETADAMNR	Oxidation(M)@12		-0.000991018	1580.66	791.338	1580.66	791.339	2	12	1.1.1.1958.37	1	24.8204	32445.5	24.4104
1	87.2	87.2	28.72	26.79	25.71	sp|P35579|MYH9_HUMAN	Myosin-9 OS=Homo sapiens GN=MYH9 PE=1 SV=4			0	92.8	ELEDATETADAMNR			-0.00156041	1564.67	783.34	1564.67	783.341	2	8	1.1.1.2191.29	1	34.5476	1137.72	34.4787
1	87.2	87.2	28.72	26.79	25.71	sp|P35579|MYH9_HUMAN	Myosin-9 OS=Homo sapiens GN=MYH9 PE=1 SV=4			0	84.06	ELEDATETADAMNR	Deamidated(N)@13		0.00282996	1565.65	783.835	1565.65	783.833	2	10	1.1.1.2289.23	1	38.6573	5719.32	38.9698
1	87.2	87.2	28.72	26.79	25.71	sp|P35579|MYH9_HUMAN	Myosin-9 OS=Homo sapiens GN=MYH9 PE=1 SV=4			0	67.85	ELEDATETADAMNR			0.0058859	1564.67	783.344	1564.67	783.341	2	8	1.1.1.2326.19	1	40.2121	1973.81	40.1512
1	87.2	87.2	28.72	26.79	25.71	sp|P35579|MYH9_HUMAN	Myosin-9 OS=Homo sapiens GN=MYH9 PE=1 SV=4			0	99	ELESQISELQEDLESER			-0.000480331	2032.94	1017.48	2032.94	1017.48	2	18	1.1.1.3137.18	1	74.3766	90555.8	74.1469
1	87.2	87.2	28.72	26.79	25.71	sp|P35579|MYH9_HUMAN	Myosin-9 OS=Homo sapiens GN=MYH9 PE=1 SV=4			0	99	ELESQISELQEDLESER			-0.00450865	2032.94	1017.48	2032.94	1017.48	2	12	1.1.1.3145.17	1	74.7153	2197.74	74.8254
1	87.2	87.2	28.72	26.79	25.71	sp|P35579|MYH9_HUMAN	Myosin-9 OS=Homo sapiens GN=MYH9 PE=1 SV=4			0	97.44	ELESQISELQEDLESER			-0.00450865	2032.94	1017.48	2032.94	1017.48	2	9	1.1.1.3153.15	1	75.0539	2197.74	74.8254
1	87.2	87.2	28.72	26.79	25.71	sp|P35579|MYH9_HUMAN	Myosin-9 OS=Homo sapiens GN=MYH9 PE=1 SV=4			0	89.3	ELESQISELQEDLESER			-0.00152487	2032.94	1017.48	2032.94	1017.48	2	8	1.1.1.3290.29	1	80.8609	256.77	80.7907
1	87.2	87.2	28.72	26.79	25.71	sp|P35579|MYH9_HUMAN	Myosin-9 OS=Homo sapiens GN=MYH9 PE=1 SV=4			0	99	EMEAELEDER			0.00196683	1249.52	625.765	1249.51	625.764	2	11	1.1.1.2162.15	1	33.3241	82631.3	33.0139
1	87.2	87.2	28.72	26.79	25.71	sp|P35579|MYH9_HUMAN	Myosin-9 OS=Homo sapiens GN=MYH9 PE=1 SV=4			0	97.44	EMEAELEDER	Oxidation(M)@2		-0.00157974	1265.51	633.761	1265.51	633.761	2	9	1.1.1.1900.16	1	22.3765	3456.27	22.3186
1	87.2	87.2	28.72	26.79	25.71	sp|P35579|MYH9_HUMAN	Myosin-9 OS=Homo sapiens GN=MYH9 PE=1 SV=4			0	96.55	EMEAELEDER	Oxidation(M)@2		-0.00157974	1265.51	633.761	1265.51	633.761	2	9	1.1.1.1892.11	1	22.0372	3456.27	22.3186
1	87.2	87.2	28.72	26.79	25.71	sp|P35579|MYH9_HUMAN	Myosin-9 OS=Homo sapiens GN=MYH9 PE=1 SV=4			0	99	EMEAELEDERK		missed R-K@10	-0.00203034	1377.61	689.81	1377.61	689.811	2	14	1.1.1.1971.15	1	25.355	94806.5	24.997
1	87.2	87.2	28.72	26.79	25.71	sp|P35579|MYH9_HUMAN	Myosin-9 OS=Homo sapiens GN=MYH9 PE=1 SV=4			0	99	EMEAELEDERK		missed R-K@10	-0.00203034	1377.61	689.81	1377.61	689.811	2	12	1.1.1.1955.23	1	24.6827	94580.6	24.997
1	87.2	87.2	28.72	26.79	25.71	sp|P35579|MYH9_HUMAN	Myosin-9 OS=Homo sapiens GN=MYH9 PE=1 SV=4			0	99	EMEAELEDERK		missed R-K@10	-0.0017862	1377.61	689.811	1377.61	689.811	2	10	1.1.1.1990.27	1	26.1477	1877.36	26.1228
1	87.2	87.2	28.72	26.79	25.71	sp|P35579|MYH9_HUMAN	Myosin-9 OS=Homo sapiens GN=MYH9 PE=1 SV=4			0	97.75	EMEAELEDERK		missed R-K@10	0.000655209	1377.61	689.812	1377.61	689.811	2	11	1.1.1.1980.22	1	25.7322	10108.5	25.2905
1	87.2	87.2	28.72	26.79	25.71	sp|P35579|MYH9_HUMAN	Myosin-9 OS=Homo sapiens GN=MYH9 PE=1 SV=4			0	25.03	EQEVNILK	Deamidated(N)@5		-0.000266414	972.512	487.264	972.513	487.264	2	6	1.1.1.2544.2	0	49.3589	6198.81	49.2709
1	87.2	87.2	28.72	26.79	25.71	sp|P35579|MYH9_HUMAN	Myosin-9 OS=Homo sapiens GN=MYH9 PE=1 SV=4			0	71.69	EQLEEEEEAKHNLEK	Deamidated(N)@12	missed K-H@10	0.0209822	1854.87	619.297	1854.85	619.29	3	10	1.1.1.2023.13	1	27.5069	32984.1	27.4522
1	87.2	87.2	28.72	26.79	25.71	sp|P35579|MYH9_HUMAN	Myosin-9 OS=Homo sapiens GN=MYH9 PE=1 SV=4			0	58.34	EQLEEEEEAKHNLEK	Glu->pyro-Glu@N-term	missed K-H@10	-0.00295482	1835.85	612.957	1835.85	612.958	3	8	1.1.1.2222.7	1	35.8355	1395.08	35.7848
1	87.2	87.2	28.72	26.79	25.71	sp|P35579|MYH9_HUMAN	Myosin-9 OS=Homo sapiens GN=MYH9 PE=1 SV=4			0	96.33	HSQAVEELAEQLEQTK			0.00500579	1838.91	920.46	1838.9	920.458	2	10	1.1.1.2764.24	1	58.6339	2192.42	58.5267
1	87.2	87.2	28.72	26.79	25.71	sp|P35579|MYH9_HUMAN	Myosin-9 OS=Homo sapiens GN=MYH9 PE=1 SV=4			0	99	IAEFTTNLTEEEEK			-0.00161708	1652.78	827.395	1652.78	827.396	2	16	1.1.1.2519.29	1	48.3295	26446.9	48.4709
1	87.2	87.2	28.72	26.79	25.71	sp|P35579|MYH9_HUMAN	Myosin-9 OS=Homo sapiens GN=MYH9 PE=1 SV=4			0	62.95	IAEFTTNLTEEEEK			-0.00161708	1652.78	827.395	1652.78	827.396	2	9	1.1.1.2531.21	1	48.829	26446.9	48.4709
1	87.2	87.2	28.72	26.79	25.71	sp|P35579|MYH9_HUMAN	Myosin-9 OS=Homo sapiens GN=MYH9 PE=1 SV=4			0	99	IAQLEEELEEEQGNTELINDR	Deamidated(N)@14		0.000967584	2472.15	1237.08	2472.15	1237.08	2	16	1.1.1.2924.41	1	65.3901	3508.57	65.565
1	87.2	87.2	28.72	26.79	25.71	sp|P35579|MYH9_HUMAN	Myosin-9 OS=Homo sapiens GN=MYH9 PE=1 SV=4			0	99	IAQLEEELEEEQGNTELINDR			0.002562	2471.17	1236.59	2471.17	1236.59	2	21	1.1.1.2960.41	1	66.9087	42735.1	67.2116
1	87.2	87.2	28.72	26.79	25.71	sp|P35579|MYH9_HUMAN	Myosin-9 OS=Homo sapiens GN=MYH9 PE=1 SV=4			0	99	IAQLEEELEEEQGNTELINDR			0.00231786	2471.17	1236.59	2471.17	1236.59	2	23	1.1.1.2968.41	1	67.249	43638.4	67.2541
1	87.2	87.2	28.72	26.79	25.71	sp|P35579|MYH9_HUMAN	Myosin-9 OS=Homo sapiens GN=MYH9 PE=1 SV=4			0	99	IAQLEEELEEEQGNTELINDR			0.00231786	2471.17	1236.59	2471.17	1236.59	2	21	1.1.1.2976.38	1	67.587	43638.4	67.2541
1	87.2	87.2	28.72	26.79	25.71	sp|P35579|MYH9_HUMAN	Myosin-9 OS=Homo sapiens GN=MYH9 PE=1 SV=4			0	99	IAQLEEELEEEQGNTELINDR			0.00158544	2471.17	1236.59	2471.17	1236.59	2	19	1.1.1.2984.41	1	67.926	30703.5	67.4658
1	87.2	87.2	28.72	26.79	25.71	sp|P35579|MYH9_HUMAN	Myosin-9 OS=Homo sapiens GN=MYH9 PE=1 SV=4			0	99	IAQLEEELEEEQGNTELINDR			-0.0120864	2471.15	1236.58	2471.17	1236.59	2	11	1.1.1.2925.39	1	65.4309	1537.82	65.4377
1	87.2	87.2	28.72	26.79	25.71	sp|P35579|MYH9_HUMAN	Myosin-9 OS=Homo sapiens GN=MYH9 PE=1 SV=4			0	99	IAQLEEELEEEQGNTELINDR			0.000699641	2471.17	1236.59	2471.17	1236.59	2	19	1.1.1.3000.38	1	68.6001	7694.53	68.397
1	87.2	87.2	28.72	26.79	25.71	sp|P35579|MYH9_HUMAN	Myosin-9 OS=Homo sapiens GN=MYH9 PE=1 SV=4			0	99	IAQLEEELEEEQGNTELINDR	Deamidated(N)@19		0.00496471	2472.16	1237.09	2472.15	1237.08	2	16	1.1.1.3000.39	1	68.6018	8442.71	68.565
1	87.2	87.2	28.72	26.79	25.71	sp|P35579|MYH9_HUMAN	Myosin-9 OS=Homo sapiens GN=MYH9 PE=1 SV=4			0	99	IAQLEEELEEEQGNTELINDR			-0.00320661	2471.16	1236.59	2471.17	1236.59	2	17	1.1.1.3008.40	1	68.9369	6572.87	68.6909
1	87.2	87.2	28.72	26.79	25.71	sp|P35579|MYH9_HUMAN	Myosin-9 OS=Homo sapiens GN=MYH9 PE=1 SV=4			0	99	IAQLEEELEEEQGNTELINDR			-0.0085777	2471.16	1236.59	2471.17	1236.59	2	18	1.1.1.3020.41	1	69.4482	3898.26	69.4107
1	87.2	87.2	28.72	26.79	25.71	sp|P35579|MYH9_HUMAN	Myosin-9 OS=Homo sapiens GN=MYH9 PE=1 SV=4			0	99	IAQLEEELEEEQGNTELINDR			-3.27807e-05	2471.17	1236.59	2471.17	1236.59	2	16	1.1.1.3047.29	1	70.59	2625.38	70.6369
1	87.2	87.2	28.72	26.79	25.71	sp|P35579|MYH9_HUMAN	Myosin-9 OS=Homo sapiens GN=MYH9 PE=1 SV=4			0	99	IAQLEEELEEEQGNTELINDR			-0.00931012	2471.16	1236.59	2471.17	1236.59	2	14	1.1.1.3028.41	1	69.7889	3351.55	69.8366
1	87.2	87.2	28.72	26.79	25.71	sp|P35579|MYH9_HUMAN	Myosin-9 OS=Homo sapiens GN=MYH9 PE=1 SV=4			0	99	IAQLEEELEEEQGNTELINDR			-0.00345075	2471.16	1236.59	2471.17	1236.59	2	14	1.1.1.3036.41	1	70.1293	2790.96	70.007
1	87.2	87.2	28.72	26.79	25.71	sp|P35579|MYH9_HUMAN	Myosin-9 OS=Homo sapiens GN=MYH9 PE=1 SV=4			0	99	IAQLEEELEEEQGNTELINDR			-0.00393903	2471.16	1236.59	2471.17	1236.59	2	13	1.1.1.3094.41	1	72.5696	2550.41	72.7018
1	87.2	87.2	28.72	26.79	25.71	sp|P35579|MYH9_HUMAN	Myosin-9 OS=Homo sapiens GN=MYH9 PE=1 SV=4			0	99	IAQLEEELEEEQGNTELINDR			-0.0137046	2471.15	1236.58	2471.17	1236.59	2	12	1.1.1.3086.38	1	72.2272	2089.23	72.0652
1	87.2	87.2	28.72	26.79	25.71	sp|P35579|MYH9_HUMAN	Myosin-9 OS=Homo sapiens GN=MYH9 PE=1 SV=4			0	98.8	IAQLEEELEEEQGNTELINDR			-0.00223004	2471.16	1236.59	2471.17	1236.59	2	12	1.1.1.3039.38	1	70.2537	2734.48	70.1766
1	87.2	87.2	28.72	26.79	25.71	sp|P35579|MYH9_HUMAN	Myosin-9 OS=Homo sapiens GN=MYH9 PE=1 SV=4			0	98.77	IAQLEEELEEEQGNTELINDR	Deamidated(N)@14		-0.00162708	2472.15	1237.08	2472.15	1237.08	2	12	1.1.1.3090.41	1	72.3997	1632.08	72.3623
1	87.2	87.2	28.72	26.79	25.71	sp|P35579|MYH9_HUMAN	Myosin-9 OS=Homo sapiens GN=MYH9 PE=1 SV=4			0	96.9	IAQLEEELEEEQGNTELINDR			-0.0119957	2471.15	1236.58	2471.17	1236.59	2	11	1.1.1.3055.41	1	70.9245	2560.82	70.7624
1	87.2	87.2	28.72	26.79	25.71	sp|P35579|MYH9_HUMAN	Myosin-9 OS=Homo sapiens GN=MYH9 PE=1 SV=4			0	86.01	IAQLEEELEEEQGNTELINDR			-0.0119957	2471.15	1236.58	2471.17	1236.59	2	10	1.1.1.3104.40	1	72.9937	1978.62	73.0421
1	87.2	87.2	28.72	26.79	25.71	sp|P35579|MYH9_HUMAN	Myosin-9 OS=Homo sapiens GN=MYH9 PE=1 SV=4			0	80.65	IAQLEEELEEEQGNTELINDR	Deamidated(Q)@12		-0.00358021	2472.15	1237.08	2472.15	1237.08	2	9	1.1.1.3076.39	1	71.8041	1901.66	71.642
1	87.2	87.2	28.72	26.79	25.71	sp|P35579|MYH9_HUMAN	Myosin-9 OS=Homo sapiens GN=MYH9 PE=1 SV=4			0	77.56	IAQLEEELEEEQGNTELINDR	Deamidated(N)@14		-0.00553333	2472.15	1237.08	2472.15	1237.08	2	10	1.1.1.3059.26	0	71.0901	2752.78	71.0549
1	87.2	87.2	28.72	26.79	25.71	sp|P35579|MYH9_HUMAN	Myosin-9 OS=Homo sapiens GN=MYH9 PE=1 SV=4			0	99	IAQLEEQLDNETK			-0.000884086	1529.76	765.885	1529.76	765.886	2	16	1.1.1.2410.17	1	43.7371	80713.2	44.141
1	87.2	87.2	28.72	26.79	25.71	sp|P35579|MYH9_HUMAN	Myosin-9 OS=Homo sapiens GN=MYH9 PE=1 SV=4			0	99	IAQLEEQLDNETK			-0.000884086	1529.76	765.885	1529.76	765.886	2	20	1.1.1.2418.23	1	44.0787	85880.1	44.141
1	87.2	87.2	28.72	26.79	25.71	sp|P35579|MYH9_HUMAN	Myosin-9 OS=Homo sapiens GN=MYH9 PE=1 SV=4			0	99	IAQLEEQLDNETK			-0.000884086	1529.76	765.885	1529.76	765.886	2	18	1.1.1.2426.23	1	44.4162	85880.1	44.141
1	87.2	87.2	28.72	26.79	25.71	sp|P35579|MYH9_HUMAN	Myosin-9 OS=Homo sapiens GN=MYH9 PE=1 SV=4			0	99	IAQLEEQLDNETK			-0.000884086	1529.76	765.885	1529.76	765.886	2	12	1.1.1.2423.21	1	44.288	85880.1	44.141
1	87.2	87.2	28.72	26.79	25.71	sp|P35579|MYH9_HUMAN	Myosin-9 OS=Homo sapiens GN=MYH9 PE=1 SV=4			0	99	IAQLEEQLDNETK			-0.012847	1529.74	765.88	1529.76	765.886	2	8	1.1.1.2451.22	1	45.4656	2360.13	45.1933
1	87.2	87.2	28.72	26.79	25.71	sp|P35579|MYH9_HUMAN	Myosin-9 OS=Homo sapiens GN=MYH9 PE=1 SV=4			0	51.53	IAQLEEQLDNETKER		missed K-E@13	0.00331845	1814.9	605.975	1814.9	605.974	3	9	1.1.1.2392.10	1	42.9753	17824.1	42.7952
1	87.2	87.2	28.72	26.79	25.71	sp|P35579|MYH9_HUMAN	Myosin-9 OS=Homo sapiens GN=MYH9 PE=1 SV=4			0	99	KGAGDGSDEEVDGKADGAEAKPAE	Phospho(S)@7	missed K-G@1; missed K-A@14	0.00399287	2381.99	795.004	2381.99	795.003	3	22	1.1.1.1829.30	1	19.4119	66145.8	19.4683
1	87.2	87.2	28.72	26.79	25.71	sp|P35579|MYH9_HUMAN	Myosin-9 OS=Homo sapiens GN=MYH9 PE=1 SV=4			0	99	KGAGDGSDEEVDGKADGAEAKPAE	Phospho(S)@7	missed K-G@1; missed K-A@14	0.00362666	2381.99	795.004	2381.99	795.003	3	17	1.1.1.1795.24	1	17.9854	4057.62	17.914
1	87.2	87.2	28.72	26.79	25.71	sp|P35579|MYH9_HUMAN	Myosin-9 OS=Homo sapiens GN=MYH9 PE=1 SV=4			0	99	KGAGDGSDEEVDGKADGAEAKPAE	Phospho(S)@7	missed K-G@1; missed K-A@14	0.00289424	2381.99	795.004	2381.99	795.003	3	16	1.1.1.1853.33	1	20.4181	9365.05	20.2624
1	87.2	87.2	28.72	26.79	25.71	sp|P35579|MYH9_HUMAN	Myosin-9 OS=Homo sapiens GN=MYH9 PE=1 SV=4			0	99	KGAGDGSDEEVDGKADGAEAKPAE	Phospho(S)@7	missed K-G@1; missed K-A@14	0.00435909	2381.99	795.004	2381.99	795.003	3	15	1.1.1.1845.23	1	20.0756	8674.18	20.0128
1	87.2	87.2	28.72	26.79	25.71	sp|P35579|MYH9_HUMAN	Myosin-9 OS=Homo sapiens GN=MYH9 PE=1 SV=4			0	99	KGAGDGSDEEVDGKADGAEAKPAE	Phospho(S)@7	missed K-G@1; missed K-A@14	0.00545772	2381.99	795.005	2381.99	795.003	3	11	1.1.1.1813.21	1	18.7301	891.585	18.7518
1	87.2	87.2	28.72	26.79	25.71	sp|P35579|MYH9_HUMAN	Myosin-9 OS=Homo sapiens GN=MYH9 PE=1 SV=4			0	99	KGAGDGSDEEVDGKADGAEAKPAE	Phospho(S)@7	missed K-G@1; missed K-A@14	0.00344356	2381.99	795.004	2381.99	795.003	3	11	1.1.1.1803.30	1	18.3181	4217.14	17.8725
1	87.2	87.2	28.72	26.79	25.71	sp|P35579|MYH9_HUMAN	Myosin-9 OS=Homo sapiens GN=MYH9 PE=1 SV=4			0	99	KGAGDGSDEEVDGKADGAEAKPAE	Phospho(S)@7	missed K-G@1; missed K-A@14	0.00362666	2381.99	795.004	2381.99	795.003	3	12	1.1.1.1787.12	1	17.6489	4057.62	17.914
1	87.2	87.2	28.72	26.79	25.71	sp|P35579|MYH9_HUMAN	Myosin-9 OS=Homo sapiens GN=MYH9 PE=1 SV=4			0	99	KGAGDGSDEEVDGKADGAEAKPAE		missed K-G@1; missed K-A@14	0.00354075	2302.02	768.348	2302.02	768.347	3	13	1.1.1.1785.9	1	17.5693	3755.79	17.6665
1	87.2	87.2	28.72	26.79	25.71	sp|P35579|MYH9_HUMAN	Myosin-9 OS=Homo sapiens GN=MYH9 PE=1 SV=4			0	99	KGAGDGSDEEVDGKADGAEAKPAE	Phospho(S)@7	missed K-G@1; missed K-A@14	0.0213879	2382.01	795.01	2381.99	795.003	3	9	1.1.1.1813.22	1	18.7309	891.585	18.7518
1	87.2	87.2	28.72	26.79	25.71	sp|P35579|MYH9_HUMAN	Myosin-9 OS=Homo sapiens GN=MYH9 PE=1 SV=4			0	98.93	KGAGDGSDEEVDGKADGAEAKPAE	Phospho(S)@7	missed K-G@1; missed K-A@14	0.00545772	2381.99	795.005	2381.99	795.003	3	11	1.1.1.1862.33	1	20.7978	1308.46	20.8095
1	87.2	87.2	28.72	26.79	25.71	sp|P35579|MYH9_HUMAN	Myosin-9 OS=Homo sapiens GN=MYH9 PE=1 SV=4			0	76.21	KGAGDGSDEEVDGKADGAEAKPAE		missed K-G@1; missed K-A@14	0.000634618	2302.02	576.512	2302.02	576.512	4	7	1.1.1.1792.14	1	17.8449	4741.59	17.6254
1	87.2	87.2	28.72	26.79	25.71	sp|P35579|MYH9_HUMAN	Myosin-9 OS=Homo sapiens GN=MYH9 PE=1 SV=4			0	22.45	KGAGDGSDEEVDGKADGAEAKPAE	Phospho(S)@7	missed K-G@1; missed K-A@14	0.00435909	2381.99	795.004	2381.99	795.003	3	6	1.1.1.1821.30	1	19.0745	65861.6	19.4683
1	87.2	87.2	28.72	26.79	25.71	sp|P35579|MYH9_HUMAN	Myosin-9 OS=Homo sapiens GN=MYH9 PE=1 SV=4			0	99	KLEGDSTDLSDQIAELQAQIAELK		missed K-L@1	0.00544502	2614.34	872.454	2614.33	872.452	3	22	1.1.1.3219.15	1	77.8578	32580.6	77.9692
1	87.2	87.2	28.72	26.79	25.71	sp|P35579|MYH9_HUMAN	Myosin-9 OS=Homo sapiens GN=MYH9 PE=1 SV=4			0	99	KLEGDSTDLSDQIAELQAQIAELK		missed K-L@1	0.00544502	2614.34	872.454	2614.33	872.452	3	18	1.1.1.3225.13	1	78.1087	32580.6	77.9692
1	87.2	87.2	28.72	26.79	25.71	sp|P35579|MYH9_HUMAN	Myosin-9 OS=Homo sapiens GN=MYH9 PE=1 SV=4			0	76.84	KQELEEICHDLEAR	Carbamidomethyl(C)@8	missed K-Q@1	0.00265291	1768.84	590.622	1768.84	590.621	3	7	1.1.1.2516.5	1	48.1832	10704.9	47.8398
1	87.2	87.2	28.72	26.79	25.71	sp|P35579|MYH9_HUMAN	Myosin-9 OS=Homo sapiens GN=MYH9 PE=1 SV=4			0	39.42	KQELEEICHDLEAR	Carbamidomethyl(C)@8	missed K-Q@1	0.00265291	1768.84	590.622	1768.84	590.621	3	6	1.1.1.2500.4	1	47.5104	10559.1	47.8398
1	87.2	87.2	28.72	26.79	25.71	sp|P35579|MYH9_HUMAN	Myosin-9 OS=Homo sapiens GN=MYH9 PE=1 SV=4			0	99	LEGDSTDLSDQIAELQAQIAELK			0.00218864	2486.24	1244.13	2486.24	1244.13	2	14	1.1.1.3253.23	1	79.298	18823.1	79.3865
1	87.2	87.2	28.72	26.79	25.71	sp|P35579|MYH9_HUMAN	Myosin-9 OS=Homo sapiens GN=MYH9 PE=1 SV=4			0	99	LQVELDNVTGLLSQSDSK			-0.00259239	1945	973.506	1945	973.507	2	11	1.1.1.3133.15	1	74.2046	3043.07	73.7653
1	87.2	87.2	28.72	26.79	25.71	sp|P35579|MYH9_HUMAN	Myosin-9 OS=Homo sapiens GN=MYH9 PE=1 SV=4			0	99	LQVELDNVTGLLSQSDSK			-0.00320274	1945	973.506	1945	973.507	2	13	1.1.1.3125.22	1	73.8715	8029.98	73.6376
1	87.2	87.2	28.72	26.79	25.71	sp|P35579|MYH9_HUMAN	Myosin-9 OS=Homo sapiens GN=MYH9 PE=1 SV=4			0	99	LQVELDNVTGLLSQSDSK			-0.00320274	1945	973.506	1945	973.507	2	13	1.1.1.3122.21	1	73.7435	8029.98	73.6376
1	87.2	87.2	28.72	26.79	25.71	sp|P35579|MYH9_HUMAN	Myosin-9 OS=Homo sapiens GN=MYH9 PE=1 SV=4			0	99	MEDSVGCLETAEEVK	Carbamidomethyl(C)@7		-0.000747029	1695.73	848.874	1695.73	848.874	2	11	1.1.1.2494.21	1	47.272	11964.1	46.9565
1	87.2	87.2	28.72	26.79	25.71	sp|P35579|MYH9_HUMAN	Myosin-9 OS=Homo sapiens GN=MYH9 PE=1 SV=4			0	99	MQQNIQELEEQLEEEESAR			-0.000640332	2332.05	1167.03	2332.05	1167.03	2	17	1.1.1.3066.36	1	71.3803	32049.6	71.642
1	87.2	87.2	28.72	26.79	25.71	sp|P35579|MYH9_HUMAN	Myosin-9 OS=Homo sapiens GN=MYH9 PE=1 SV=4			0	99	MQQNIQELEEQLEEEESAR			-0.000640332	2332.05	1167.03	2332.05	1167.03	2	17	1.1.1.3082.35	1	72.0551	32532.3	71.5999
1	87.2	87.2	28.72	26.79	25.71	sp|P35579|MYH9_HUMAN	Myosin-9 OS=Homo sapiens GN=MYH9 PE=1 SV=4			0	99	MQQNIQELEEQLEEEESAR	Oxidation(M)@1		0.00460238	2348.05	1175.03	2348.04	1175.03	2	13	1.1.1.2996.34	1	68.4283	2686.34	68.5232
1	87.2	87.2	28.72	26.79	25.71	sp|P35579|MYH9_HUMAN	Myosin-9 OS=Homo sapiens GN=MYH9 PE=1 SV=4			0	91.74	MQQNIQELEEQLEEEESAR			0.00521904	2332.05	1167.03	2332.05	1167.03	2	9	1.1.1.3105.35	1	73.032	1601.83	72.957
1	87.2	87.2	28.72	26.79	25.71	sp|P35579|MYH9_HUMAN	Myosin-9 OS=Homo sapiens GN=MYH9 PE=1 SV=4			0	87.97	MQQNIQELEEQLEEEESAR			0.00131279	2332.05	1167.03	2332.05	1167.03	2	10	1.1.1.3111.35	1	73.2867	1711.19	73.3393
1	87.2	87.2	28.72	26.79	25.71	sp|P35579|MYH9_HUMAN	Myosin-9 OS=Homo sapiens GN=MYH9 PE=1 SV=4			0	71.91	MQQNIQELEEQLEEEESAR			0.00424248	2332.05	1167.03	2332.05	1167.03	2	8	1.1.1.3114.36	1	73.4152	1711.19	73.3393
1	87.2	87.2	28.72	26.79	25.71	sp|P35579|MYH9_HUMAN	Myosin-9 OS=Homo sapiens GN=MYH9 PE=1 SV=4			0	99	NTDQASMPDNTAAQK			-0.00304958	1590.69	796.353	1590.69	796.354	2	19	1.1.1.1779.26	1	17.321	5051.86	17.4202
1	87.2	87.2	28.72	26.79	25.71	sp|P35579|MYH9_HUMAN	Myosin-9 OS=Homo sapiens GN=MYH9 PE=1 SV=4			0	99	NTDQASMPDNTAAQK			-0.00268336	1590.69	796.353	1590.69	796.354	2	11	1.1.1.1771.23	1	16.9896	4038.59	17.3789
1	87.2	87.2	28.72	26.79	25.71	sp|P35579|MYH9_HUMAN	Myosin-9 OS=Homo sapiens GN=MYH9 PE=1 SV=4			0	99	NTDQASMPDNTAAQK	Deamidated(N)@1		-0.00024591	1591.68	796.846	1591.68	796.846	2	12	1.1.1.1872.32	1	21.2174	2540.89	20.9779
1	87.2	87.2	28.72	26.79	25.71	sp|P35579|MYH9_HUMAN	Myosin-9 OS=Homo sapiens GN=MYH9 PE=1 SV=4			0	99	NTDQASMPDNTAAQK	Deamidated(N)@1		-0.00024591	1591.68	796.846	1591.68	796.846	2	13	1.1.1.1864.31	1	20.8804	2540.89	20.9779
1	87.2	87.2	28.72	26.79	25.71	sp|P35579|MYH9_HUMAN	Myosin-9 OS=Homo sapiens GN=MYH9 PE=1 SV=4			0	24.78	NTDQASMPDNTAAQK	Deamidated(N)@10		0.0144026	1591.69	796.854	1591.68	796.846	2	7	1.1.1.1803.31	1	18.3189	1213.11	18.2903
1	87.2	87.2	28.72	26.79	25.71	sp|P35579|MYH9_HUMAN	Myosin-9 OS=Homo sapiens GN=MYH9 PE=1 SV=4			0	99	QAQQERDELADEIANSSGK		missed R-D@6	0.00434605	2087.98	1044.99	2087.97	1044.99	2	12	1.1.1.2338.36	1	40.7324	4691.33	40.9093
1	87.2	87.2	28.72	26.79	25.71	sp|P35579|MYH9_HUMAN	Myosin-9 OS=Homo sapiens GN=MYH9 PE=1 SV=4			0	99	QAQQERDELADEIANSSGK	Deamidated(Q)@4	missed R-D@6	0.0223183	2088.98	697.333	2088.96	697.326	3	16	1.1.1.2345.19	1	41.0112	8283.73	40.8675
1	87.2	87.2	28.72	26.79	25.71	sp|P35579|MYH9_HUMAN	Myosin-9 OS=Homo sapiens GN=MYH9 PE=1 SV=4			0	99	QAQQERDELADEIANSSGK	Gln->pyro-Glu@N-term	missed R-D@6	-0.00365194	2070.94	1036.48	2070.95	1036.48	2	15	1.1.1.2642.36	1	53.5147	33848.8	53.6922
1	87.2	87.2	28.72	26.79	25.71	sp|P35579|MYH9_HUMAN	Myosin-9 OS=Homo sapiens GN=MYH9 PE=1 SV=4			0	99	QAQQERDELADEIANSSGK	Gln->pyro-Glu@N-term	missed R-D@6	-0.00365194	2070.94	1036.48	2070.95	1036.48	2	24	1.1.1.2646.33	1	53.6804	33848.8	53.6922
1	87.2	87.2	28.72	26.79	25.71	sp|P35579|MYH9_HUMAN	Myosin-9 OS=Homo sapiens GN=MYH9 PE=1 SV=4			0	99	QAQQERDELADEIANSSGK	Gln->pyro-Glu@N-term	missed R-D@6	-0.00365194	2070.94	1036.48	2070.95	1036.48	2	18	1.1.1.2654.28	1	54.0119	33848.8	53.6922
1	87.2	87.2	28.72	26.79	25.71	sp|P35579|MYH9_HUMAN	Myosin-9 OS=Homo sapiens GN=MYH9 PE=1 SV=4			0	99	QAQQERDELADEIANSSGK	Gln->pyro-Glu@N-term	missed R-D@6	0.00245158	2070.95	1036.48	2070.95	1036.48	2	11	1.1.1.2662.31	1	54.348	7966.11	53.9023
1	87.2	87.2	28.72	26.79	25.71	sp|P35579|MYH9_HUMAN	Myosin-9 OS=Homo sapiens GN=MYH9 PE=1 SV=4			0	97.6	QAQQERDELADEIANSSGK		missed R-D@6	0.00410191	2087.98	1044.99	2087.97	1044.99	2	11	1.1.1.2352.20	1	41.3164	4915.38	40.8675
1	87.2	87.2	28.72	26.79	25.71	sp|P35579|MYH9_HUMAN	Myosin-9 OS=Homo sapiens GN=MYH9 PE=1 SV=4			0	54.58	QAQQERDELADEIANSSGK		missed R-D@6	0.00254701	2087.97	696.999	2087.97	696.998	3	8	1.1.1.2299.10	1	39.0651	939.925	38.9698
1	87.2	87.2	28.72	26.79	25.71	sp|P35579|MYH9_HUMAN	Myosin-9 OS=Homo sapiens GN=MYH9 PE=1 SV=4			0	48.09	QAQQERDELADEIANSSGK	Gln->pyro-Glu@N-term	missed R-D@6	-0.0131734	2070.93	1036.47	2070.95	1036.48	2	7	1.1.1.2687.36	1	55.3995	2070.59	54.9471
1	87.2	87.2	28.72	26.79	25.71	sp|P35579|MYH9_HUMAN	Myosin-9 OS=Homo sapiens GN=MYH9 PE=1 SV=4			0	28.65	QAQQERDELADEIANSSGK	Deamidated(N)@15	missed R-D@6	0.0012611	2088.96	697.326	2088.96	697.326	3	8	1.1.1.2212.18	1	35.4227	4310.07	35.6159
1	87.2	87.2	28.72	26.79	25.71	sp|P35579|MYH9_HUMAN	Myosin-9 OS=Homo sapiens GN=MYH9 PE=1 SV=4			0	99	QLEEAEEEAQR			-0.00164629	1330.6	666.307	1330.6	666.307	2	14	1.1.1.1903.17	1	22.503	132080	22.2348
1	87.2	87.2	28.72	26.79	25.71	sp|P35579|MYH9_HUMAN	Myosin-9 OS=Homo sapiens GN=MYH9 PE=1 SV=4			0	99	QLEEAEEEAQR			-0.00164629	1330.6	666.307	1330.6	666.307	2	12	1.1.1.1887.21	1	21.8371	130956	22.2348
1	87.2	87.2	28.72	26.79	25.71	sp|P35579|MYH9_HUMAN	Myosin-9 OS=Homo sapiens GN=MYH9 PE=1 SV=4			0	99	QLEEAEEEAQR			-0.0020125	1330.6	666.306	1330.6	666.307	2	12	1.1.1.1911.18	1	22.8392	50447	22.4025
1	87.2	87.2	28.72	26.79	25.71	sp|P35579|MYH9_HUMAN	Myosin-9 OS=Homo sapiens GN=MYH9 PE=1 SV=4			0	95	QLEEAEEEAQR	Deamidated(Q)@10		0.00786579	1331.59	666.803	1331.58	666.799	2	11	1.1.1.1953.14	1	24.5914	4092.23	24.5772
1	87.2	87.2	28.72	26.79	25.71	sp|P35579|MYH9_HUMAN	Myosin-9 OS=Homo sapiens GN=MYH9 PE=1 SV=4			0	87.38	QLEEAEEEAQR			0.000306845	1330.6	666.308	1330.6	666.307	2	8	1.1.1.1919.13	1	23.1688	6306.94	22.7378
1	87.2	87.2	28.72	26.79	25.71	sp|P35579|MYH9_HUMAN	Myosin-9 OS=Homo sapiens GN=MYH9 PE=1 SV=4			0	56.15	QLEEAEEEAQR	Deamidated(Q)@10		0.016172	1331.6	666.807	1331.58	666.799	2	9	1.1.1.1910.26	1	22.804	26644	22.3606
1	87.2	87.2	28.72	26.79	25.71	sp|P35579|MYH9_HUMAN	Myosin-9 OS=Homo sapiens GN=MYH9 PE=1 SV=4			0	48.13	QLEEAEEEAQR			0.00189004	1330.6	666.308	1330.6	666.307	2	8	1.1.1.1927.17	1	23.5041	2158.31	23.3629
1	87.2	87.2	28.72	26.79	25.71	sp|P35579|MYH9_HUMAN	Myosin-9 OS=Homo sapiens GN=MYH9 PE=1 SV=4			0	36.83	QTLENERGELANEVK		missed R-G@7	-0.00436939	1728.86	865.437	1728.86	865.439	2	6	1.1.1.2232.31	1	36.275	1151.38	36.2884
1	87.2	87.2	28.72	26.79	25.71	sp|P35579|MYH9_HUMAN	Myosin-9 OS=Homo sapiens GN=MYH9 PE=1 SV=4			0	18.7	QTLENERGELANEVK	Deamidated(N)@5	missed R-G@7	0.00758935	1729.86	865.935	1729.85	865.931	2	8	1.1.1.2237.36	1	36.4878	1654.19	36.4552
1	87.2	87.2	28.72	26.79	25.71	sp|P35579|MYH9_HUMAN	Myosin-9 OS=Homo sapiens GN=MYH9 PE=1 SV=4			0	99	RQLEEAEEEAQR		missed R-Q@1	-0.00209147	1486.7	744.357	1486.7	744.358	2	18	1.1.1.1857.31	1	20.5853	15446.2	20.7674
1	87.2	87.2	28.72	26.79	25.71	sp|P35579|MYH9_HUMAN	Myosin-9 OS=Homo sapiens GN=MYH9 PE=1 SV=4			0	99	RQLEEAEEEAQR		missed R-Q@1	-0.000410154	1486.7	496.574	1486.7	496.574	3	9	1.1.1.1861.5	1	20.7323	9026.95	20.7674
1	87.2	87.2	28.72	26.79	25.71	sp|P35579|MYH9_HUMAN	Myosin-9 OS=Homo sapiens GN=MYH9 PE=1 SV=4			0	99	SMMQDREDQSILCTGESGAGK	Carbamidomethyl(C)@13	missed R-E@6	0.00085409	2298.99	767.337	2298.99	767.337	3	16	1.1.1.2366.15	1	41.8862	6109.93	41.9948
1	87.2	87.2	28.72	26.79	25.71	sp|P35579|MYH9_HUMAN	Myosin-9 OS=Homo sapiens GN=MYH9 PE=1 SV=4			0	99	SMMQDREDQSILCTGESGAGK	Carbamidomethyl(C)@13	missed R-E@6	0.000111496	2298.99	767.337	2298.99	767.337	3	14	1.1.1.2374.24	1	42.2271	6026.73	41.9948
1	87.2	87.2	28.72	26.79	25.71	sp|P35579|MYH9_HUMAN	Myosin-9 OS=Homo sapiens GN=MYH9 PE=1 SV=4			0	99	SMMQDREDQSILCTGESGAGK	Carbamidomethyl(C)@13	missed R-E@6	0.000111496	2298.99	767.337	2298.99	767.337	3	12	1.1.1.2375.25	1	42.2701	6026.73	41.9948
1	87.2	87.2	28.72	26.79	25.71	sp|P35579|MYH9_HUMAN	Myosin-9 OS=Homo sapiens GN=MYH9 PE=1 SV=4			0	99	TELEDTLDSTAAQQELR			-0.00181133	1918.91	960.462	1918.91	960.463	2	19	1.1.1.2709.24	1	56.3144	22717.6	56.0813
1	87.2	87.2	28.72	26.79	25.71	sp|P35579|MYH9_HUMAN	Myosin-9 OS=Homo sapiens GN=MYH9 PE=1 SV=4			0	99	TELEDTLDSTAAQQELR			-0.00217754	1918.91	960.462	1918.91	960.463	2	12	1.1.1.2722.32	1	56.8705	3453.23	56.4179
1	87.2	87.2	28.72	26.79	25.71	sp|P35579|MYH9_HUMAN	Myosin-9 OS=Homo sapiens GN=MYH9 PE=1 SV=4			0	98.74	TELEDTLDSTAAQQELR			-0.00144512	1918.91	960.462	1918.91	960.463	2	9	1.1.1.2693.32	1	55.6491	19692	56.0394
1	87.2	87.2	28.72	26.79	25.71	sp|P35579|MYH9_HUMAN	Myosin-9 OS=Homo sapiens GN=MYH9 PE=1 SV=4			0	99	TEMEDLMSSK			0.000177406	1169.49	585.755	1169.49	585.755	2	8	1.1.1.2405.5	1	43.5169	6389.87	43.2582
1	87.2	87.2	28.72	26.79	25.71	sp|P35579|MYH9_HUMAN	Myosin-9 OS=Homo sapiens GN=MYH9 PE=1 SV=4			0	99	TEMEDLMSSKDDVGK		missed K-D@10	7.95519e-05	1683.73	842.874	1683.73	842.874	2	23	1.1.1.2401.36	1	43.3746	37979.5	43.4259
1	87.2	87.2	28.72	26.79	25.71	sp|P35579|MYH9_HUMAN	Myosin-9 OS=Homo sapiens GN=MYH9 PE=1 SV=4			0	99	TEMEDLMSSKDDVGK		missed K-D@10	7.95519e-05	1683.73	842.874	1683.73	842.874	2	22	1.1.1.2409.29	1	43.7051	37979.5	43.4259
2	60.63	60.63	22.41	18.49	16.83	tr|A6NG51|A6NG51_HUMAN; sp|Q13813|SPTN1_HUMAN	Spectrin alpha chain, non-erythrocytic 1 OS=Homo sapiens GN=SPTAN1 PE=2 SV=2; Spectrin alpha chain, non-erythrocytic 1 OS=Homo sapiens GN=SPTAN1 PE=1 SV=3			2	99	ADVVESWIGEK			-0.00191946	1231.61	616.811	1231.61	616.812	2	13	1.1.1.2728.2	1	57.0993	2506.32	56.8831
2	60.63	60.63	22.41	18.49	16.83	tr|A6NG51|A6NG51_HUMAN; sp|Q13813|SPTN1_HUMAN	Spectrin alpha chain, non-erythrocytic 1 OS=Homo sapiens GN=SPTAN1 PE=2 SV=2; Spectrin alpha chain, non-erythrocytic 1 OS=Homo sapiens GN=SPTAN1 PE=1 SV=3			2	99	ALINADELASDVAGAEALLDR			-0.00216935	2126.08	1064.05	2126.09	1064.05	2	22	1.1.1.3279.32	1	80.3941	2515.07	80.4067
2	60.63	60.63	22.41	18.49	16.83	tr|A6NG51|A6NG51_HUMAN; sp|Q13813|SPTN1_HUMAN	Spectrin alpha chain, non-erythrocytic 1 OS=Homo sapiens GN=SPTAN1 PE=2 SV=2; Spectrin alpha chain, non-erythrocytic 1 OS=Homo sapiens GN=SPTAN1 PE=1 SV=3			2	99	ASAFNSWFENAEEDLTDPVR	Deamidated(N)@5		0.00314598	2298.01	1150.01	2298.01	1150.01	2	12	1.1.1.3216.30	1	77.7421	1110.37	77.7137
2	60.63	60.63	22.41	18.49	16.83	tr|A6NG51|A6NG51_HUMAN; sp|Q13813|SPTN1_HUMAN	Spectrin alpha chain, non-erythrocytic 1 OS=Homo sapiens GN=SPTAN1 PE=2 SV=2; Spectrin alpha chain, non-erythrocytic 1 OS=Homo sapiens GN=SPTAN1 PE=1 SV=3			2	99	DADETKEWIEEK		missed K-E@6	0.00150969	1491.67	746.845	1491.67	746.844	2	20	1.1.1.2295.22	1	38.907	39846.8	38.7609
2	60.63	60.63	22.41	18.49	16.83	tr|A6NG51|A6NG51_HUMAN; sp|Q13813|SPTN1_HUMAN	Spectrin alpha chain, non-erythrocytic 1 OS=Homo sapiens GN=SPTAN1 PE=2 SV=2; Spectrin alpha chain, non-erythrocytic 1 OS=Homo sapiens GN=SPTAN1 PE=1 SV=3			2	99	DCEQAENWMAAR	Carbamidomethyl(C)@2		0.000395237	1479.59	740.801	1479.59	740.801	2	16	1.1.1.2448.18	1	45.3366	39222.6	45.4448
2	60.63	60.63	22.41	18.49	16.83	tr|A6NG51|A6NG51_HUMAN; sp|Q13813|SPTN1_HUMAN	Spectrin alpha chain, non-erythrocytic 1 OS=Homo sapiens GN=SPTAN1 PE=2 SV=2; Spectrin alpha chain, non-erythrocytic 1 OS=Homo sapiens GN=SPTAN1 PE=1 SV=3			2	99	DLAALEDK			0.000383779	873.445	437.73	873.444	437.729	2	6	1.1.1.2201.2	1	34.9453	1969.64	34.8148
2	60.63	60.63	22.41	18.49	16.83	tr|A6NG51|A6NG51_HUMAN; sp|Q13813|SPTN1_HUMAN	Spectrin alpha chain, non-erythrocytic 1 OS=Homo sapiens GN=SPTAN1 PE=2 SV=2; Spectrin alpha chain, non-erythrocytic 1 OS=Homo sapiens GN=SPTAN1 PE=1 SV=3			2	99	DLAALGDKVNSLGETAER	Deamidated(N)@10	missed K-V@8	-0.00426582	1858.92	930.469	1858.93	930.471	2	13	1.1.1.2542.32	1	49.3001	1190.61	49.3545
2	60.63	60.63	22.41	18.49	16.83	tr|A6NG51|A6NG51_HUMAN; sp|Q13813|SPTN1_HUMAN	Spectrin alpha chain, non-erythrocytic 1 OS=Homo sapiens GN=SPTAN1 PE=2 SV=2; Spectrin alpha chain, non-erythrocytic 1 OS=Homo sapiens GN=SPTAN1 PE=1 SV=3			2	99	DTEQVDNWMSK			0.000992341	1351.57	676.793	1351.57	676.793	2	12	1.1.1.2429.15	1	44.5359	21648	44.647
2	60.63	60.63	22.41	18.49	16.83	tr|A6NG51|A6NG51_HUMAN; sp|Q13813|SPTN1_HUMAN	Spectrin alpha chain, non-erythrocytic 1 OS=Homo sapiens GN=SPTAN1 PE=2 SV=2; Spectrin alpha chain, non-erythrocytic 1 OS=Homo sapiens GN=SPTAN1 PE=1 SV=3			2	99	DVDEIEAWISEK			-0.000895637	1432.67	717.343	1432.67	717.343	2	13	1.1.1.3162.3	1	75.427	3957.68	75.4217
2	60.63	60.63	22.41	18.49	16.83	tr|A6NG51|A6NG51_HUMAN; sp|Q13813|SPTN1_HUMAN	Spectrin alpha chain, non-erythrocytic 1 OS=Homo sapiens GN=SPTAN1 PE=2 SV=2; Spectrin alpha chain, non-erythrocytic 1 OS=Homo sapiens GN=SPTAN1 PE=1 SV=3			2	99	DVEDEETWIR			-0.00120622	1290.57	646.293	1290.57	646.294	2	10	1.1.1.2603.6	1	51.8495	28092.8	51.4188
2	60.63	60.63	22.41	18.49	16.83	tr|A6NG51|A6NG51_HUMAN; sp|Q13813|SPTN1_HUMAN	Spectrin alpha chain, non-erythrocytic 1 OS=Homo sapiens GN=SPTAN1 PE=2 SV=2; Spectrin alpha chain, non-erythrocytic 1 OS=Homo sapiens GN=SPTAN1 PE=1 SV=3			2	99	DVTGAEALLER			-0.00128794	1172.6	587.308	1172.6	587.309	2	11	1.1.1.2652.4	1	53.9082	24850	53.482
2	60.63	60.63	22.41	18.49	16.83	tr|A6NG51|A6NG51_HUMAN; sp|Q13813|SPTN1_HUMAN	Spectrin alpha chain, non-erythrocytic 1 OS=Homo sapiens GN=SPTAN1 PE=2 SV=2; Spectrin alpha chain, non-erythrocytic 1 OS=Homo sapiens GN=SPTAN1 PE=1 SV=3			2	99	EAALTSEEVGADLEQVEVLQK			-0.00221784	2257.13	1129.57	2257.13	1129.57	2	19	1.1.1.3113.31	1	73.3683	21929.4	73.4671
2	60.63	60.63	22.41	18.49	16.83	tr|A6NG51|A6NG51_HUMAN; sp|Q13813|SPTN1_HUMAN	Spectrin alpha chain, non-erythrocytic 1 OS=Homo sapiens GN=SPTAN1 PE=2 SV=2; Spectrin alpha chain, non-erythrocytic 1 OS=Homo sapiens GN=SPTAN1 PE=1 SV=3			2	99	EAFLNTEDKGDSLDSVEALIK		missed K-G@9	0.00269068	2293.14	765.386	2293.13	765.385	3	15	1.1.1.3114.6	1	73.3902	23249.1	73.3818
2	60.63	60.63	22.41	18.49	16.83	tr|A6NG51|A6NG51_HUMAN; sp|Q13813|SPTN1_HUMAN	Spectrin alpha chain, non-erythrocytic 1 OS=Homo sapiens GN=SPTAN1 PE=2 SV=2; Spectrin alpha chain, non-erythrocytic 1 OS=Homo sapiens GN=SPTAN1 PE=1 SV=3			2	99	EANELQQWINEK			-0.000462319	1500.72	751.367	1500.72	751.368	2	14	1.1.1.2834.10	1	61.5596	14380.2	61.6327
2	60.63	60.63	22.41	18.49	16.83	tr|A6NG51|A6NG51_HUMAN; sp|Q13813|SPTN1_HUMAN	Spectrin alpha chain, non-erythrocytic 1 OS=Homo sapiens GN=SPTAN1 PE=2 SV=2; Spectrin alpha chain, non-erythrocytic 1 OS=Homo sapiens GN=SPTAN1 PE=1 SV=3			2	99	EKEPIVGSTDYGKDEDSAEALLK		missed K-E@2; missed K-D@13	0.00438726	2493.22	832.08	2493.21	832.078	3	15	1.1.1.2628.18	1	52.9117	13608.2	53.104
2	60.63	60.63	22.41	18.49	16.83	tr|A6NG51|A6NG51_HUMAN; sp|Q13813|SPTN1_HUMAN	Spectrin alpha chain, non-erythrocytic 1 OS=Homo sapiens GN=SPTAN1 PE=2 SV=2; Spectrin alpha chain, non-erythrocytic 1 OS=Homo sapiens GN=SPTAN1 PE=1 SV=3			2	99	EKEQLMASDDFGR		missed K-E@2	0.00117169	1524.69	509.237	1524.69	509.237	3	9	1.1.1.2217.5	1	35.623	1910.53	35.6581
2	60.63	60.63	22.41	18.49	16.83	tr|A6NG51|A6NG51_HUMAN; sp|Q13813|SPTN1_HUMAN	Spectrin alpha chain, non-erythrocytic 1 OS=Homo sapiens GN=SPTAN1 PE=2 SV=2; Spectrin alpha chain, non-erythrocytic 1 OS=Homo sapiens GN=SPTAN1 PE=1 SV=3			2	99	EQLMASDDFGR			0.00133773	1267.55	634.783	1267.55	634.782	2	10	1.1.1.2359.8	1	41.586	8133.51	41.8694
2	60.63	60.63	22.41	18.49	16.83	tr|A6NG51|A6NG51_HUMAN; sp|Q13813|SPTN1_HUMAN	Spectrin alpha chain, non-erythrocytic 1 OS=Homo sapiens GN=SPTAN1 PE=2 SV=2; Spectrin alpha chain, non-erythrocytic 1 OS=Homo sapiens GN=SPTAN1 PE=1 SV=3			2	99	GVIDMGNSLIER			-0.0147106	1302.65	652.33	1302.66	652.337	2	9	1.1.1.2756.4	1	58.2803	1279.22	58.2743
2	60.63	60.63	22.41	18.49	16.83	tr|A6NG51|A6NG51_HUMAN; sp|Q13813|SPTN1_HUMAN	Spectrin alpha chain, non-erythrocytic 1 OS=Homo sapiens GN=SPTAN1 PE=2 SV=2; Spectrin alpha chain, non-erythrocytic 1 OS=Homo sapiens GN=SPTAN1 PE=1 SV=3			2	99	KFEEFQTDMAAHEER		missed K-F@1	-0.0011699	1866.82	623.28	1866.82	623.281	3	9	1.1.1.2240.15	1	36.5964	1404.04	36.7076
2	60.63	60.63	22.41	18.49	16.83	tr|A6NG51|A6NG51_HUMAN; sp|Q13813|SPTN1_HUMAN	Spectrin alpha chain, non-erythrocytic 1 OS=Homo sapiens GN=SPTAN1 PE=2 SV=2; Spectrin alpha chain, non-erythrocytic 1 OS=Homo sapiens GN=SPTAN1 PE=1 SV=3			2	99	LDILDQER			-0.000366766	1000.52	501.267	1000.52	501.267	2	9	1.1.1.2398.2	1	43.2206	5034.51	42.8374
2	60.63	60.63	22.41	18.49	16.83	tr|A6NG51|A6NG51_HUMAN; sp|Q13813|SPTN1_HUMAN	Spectrin alpha chain, non-erythrocytic 1 OS=Homo sapiens GN=SPTAN1 PE=2 SV=2; Spectrin alpha chain, non-erythrocytic 1 OS=Homo sapiens GN=SPTAN1 PE=1 SV=3			2	99	QFQDAGHFDAENIK	Gln->pyro-Glu@N-term		0.0104461	1601.72	801.868	1601.71	801.863	2	12	1.1.1.2649.19	1	53.795	1237.37	53.8185
2	60.63	60.63	22.41	18.49	16.83	tr|A6NG51|A6NG51_HUMAN; sp|Q13813|SPTN1_HUMAN	Spectrin alpha chain, non-erythrocytic 1 OS=Homo sapiens GN=SPTAN1 PE=2 SV=2; Spectrin alpha chain, non-erythrocytic 1 OS=Homo sapiens GN=SPTAN1 PE=1 SV=3			2	99	SADESGQALLAAGHYASDEVR			0.00455974	2146	716.34	2145.99	716.338	3	16	1.1.1.2671.8	1	54.705	7402.35	54.6958
2	60.63	60.63	22.41	18.49	16.83	tr|A6NG51|A6NG51_HUMAN; sp|Q13813|SPTN1_HUMAN	Spectrin alpha chain, non-erythrocytic 1 OS=Homo sapiens GN=SPTAN1 PE=2 SV=2; Spectrin alpha chain, non-erythrocytic 1 OS=Homo sapiens GN=SPTAN1 PE=1 SV=3			2	99	SLQQLAEER	Phospho(S)@1		-0.00327377	1152.51	577.264	1152.52	577.266	2	9	1.1.1.2342.6	1	40.875	2201.23	40.6573
2	60.63	60.63	22.41	18.49	16.83	tr|A6NG51|A6NG51_HUMAN; sp|Q13813|SPTN1_HUMAN	Spectrin alpha chain, non-erythrocytic 1 OS=Homo sapiens GN=SPTAN1 PE=2 SV=2; Spectrin alpha chain, non-erythrocytic 1 OS=Homo sapiens GN=SPTAN1 PE=1 SV=3			2	99	SSEEIESAFR			-0.00077573	1153.52	577.769	1153.53	577.77	2	12	1.1.1.2326.7	1	40.2021	5022.43	40.2355
2	60.63	60.63	22.41	18.49	16.83	tr|A6NG51|A6NG51_HUMAN; sp|Q13813|SPTN1_HUMAN	Spectrin alpha chain, non-erythrocytic 1 OS=Homo sapiens GN=SPTAN1 PE=2 SV=2; Spectrin alpha chain, non-erythrocytic 1 OS=Homo sapiens GN=SPTAN1 PE=1 SV=3			2	99	VLETAEDIQER			6.95651e-05	1301.65	651.83	1301.65	651.83	2	15	1.1.1.2117.17	1	31.4387	47401.8	31.422
2	60.63	60.63	22.41	18.49	16.83	tr|A6NG51|A6NG51_HUMAN; sp|Q13813|SPTN1_HUMAN	Spectrin alpha chain, non-erythrocytic 1 OS=Homo sapiens GN=SPTAN1 PE=2 SV=2; Spectrin alpha chain, non-erythrocytic 1 OS=Homo sapiens GN=SPTAN1 PE=1 SV=3			1.92082	98.79	DLTSWVTEMK			-0.000860854	1208.57	605.294	1208.57	605.295	2	8	1.1.1.3123.2	1	73.77	1287.69	73.8501
2	60.63	60.63	22.41	18.49	16.83	tr|A6NG51|A6NG51_HUMAN; sp|Q13813|SPTN1_HUMAN	Spectrin alpha chain, non-erythrocytic 1 OS=Homo sapiens GN=SPTAN1 PE=2 SV=2; Spectrin alpha chain, non-erythrocytic 1 OS=Homo sapiens GN=SPTAN1 PE=1 SV=3			1.65758	97.79	DSDELKSWVNEK		missed K-S@6	0.00563965	1448.68	725.349	1448.68	725.346	2	10	1.1.1.2422.13	1	44.2392	2747.39	44.2255
2	60.63	60.63	22.41	18.49	16.83	tr|A6NG51|A6NG51_HUMAN; sp|Q13813|SPTN1_HUMAN	Spectrin alpha chain, non-erythrocytic 1 OS=Homo sapiens GN=SPTAN1 PE=2 SV=2; Spectrin alpha chain, non-erythrocytic 1 OS=Homo sapiens GN=SPTAN1 PE=1 SV=3			1.63827	99	LSDDNTIGKEEIQQR	Deamidated(N)@5	missed K-E@9	-0.00104138	1745.84	582.955	1745.84	582.955	3	10	1.1.1.2078.13	1	29.7961	1739.62	29.7826
2	60.63	60.63	22.41	18.49	16.83	tr|A6NG51|A6NG51_HUMAN; sp|Q13813|SPTN1_HUMAN	Spectrin alpha chain, non-erythrocytic 1 OS=Homo sapiens GN=SPTAN1 PE=2 SV=2; Spectrin alpha chain, non-erythrocytic 1 OS=Homo sapiens GN=SPTAN1 PE=1 SV=3			1.50864	99	DMDDEESWIK	Oxidation(M)@2		0.000455161	1282.5	642.259	1282.5	642.258	2	9	1.1.1.2414.9	1	43.8987	3831.35	43.8042
2	60.63	60.63	22.41	18.49	16.83	tr|A6NG51|A6NG51_HUMAN; sp|Q13813|SPTN1_HUMAN	Spectrin alpha chain, non-erythrocytic 1 OS=Homo sapiens GN=SPTAN1 PE=2 SV=2; Spectrin alpha chain, non-erythrocytic 1 OS=Homo sapiens GN=SPTAN1 PE=1 SV=3			1.49485	96.83	LLVGSEDYGR			-0.00507167	1107.55	554.783	1107.56	554.785	2	8	1.1.1.2235.7	1	36.3801	1757.85	36.5391
2	60.63	60.63	22.41	18.49	16.83	tr|A6NG51|A6NG51_HUMAN; sp|Q13813|SPTN1_HUMAN	Spectrin alpha chain, non-erythrocytic 1 OS=Homo sapiens GN=SPTAN1 PE=2 SV=2; Spectrin alpha chain, non-erythrocytic 1 OS=Homo sapiens GN=SPTAN1 PE=1 SV=3			1.33724	95.41	QQVAPTDDETGKELVLALYDYQEK		missed K-E@12	0.00453353	2752.35	918.457	2752.34	918.455	3	11	1.1.1.3126.13	1	73.9065	7050.54	73.8924
2	60.63	60.63	22.41	18.49	16.83	tr|A6NG51|A6NG51_HUMAN; sp|Q13813|SPTN1_HUMAN	Spectrin alpha chain, non-erythrocytic 1 OS=Homo sapiens GN=SPTAN1 PE=2 SV=2; Spectrin alpha chain, non-erythrocytic 1 OS=Homo sapiens GN=SPTAN1 PE=1 SV=3			0.554396	72.34	VAEDLESEGLMAEEVQAVQQQEVYGMMPR			0.0190616	3265.51	1089.51	3265.49	1089.51	3	7	1.1.1.3204.20	1	77.2255	837.036	77.2056
2	60.63	60.63	22.41	18.49	16.83	tr|A6NG51|A6NG51_HUMAN; sp|Q13813|SPTN1_HUMAN	Spectrin alpha chain, non-erythrocytic 1 OS=Homo sapiens GN=SPTAN1 PE=2 SV=2; Spectrin alpha chain, non-erythrocytic 1 OS=Homo sapiens GN=SPTAN1 PE=1 SV=3			0.255707	77.5	ECEDVMDWINDK	Carbamidomethyl(C)@2; Deamidated(N)@10		0.00276425	1553.6	777.809	1553.6	777.808	2	8	1.1.1.2934.8	1	65.7854	1189.21	65.818
2	60.63	60.63	22.41	18.49	16.83	tr|A6NG51|A6NG51_HUMAN; sp|Q13813|SPTN1_HUMAN	Spectrin alpha chain, non-erythrocytic 1 OS=Homo sapiens GN=SPTAN1 PE=2 SV=2; Spectrin alpha chain, non-erythrocytic 1 OS=Homo sapiens GN=SPTAN1 PE=1 SV=3			0.120904	24.52	DLTGVQNLR			-0.00265925	1014.54	508.279	1014.55	508.28	2	5	1.1.1.2267.2	1	37.7207	973.063	37.8837
2	60.63	60.63	22.41	18.49	16.83	tr|A6NG51|A6NG51_HUMAN; sp|Q13813|SPTN1_HUMAN	Spectrin alpha chain, non-erythrocytic 1 OS=Homo sapiens GN=SPTAN1 PE=2 SV=2; Spectrin alpha chain, non-erythrocytic 1 OS=Homo sapiens GN=SPTAN1 PE=1 SV=3			0	99	ADVVESWIGEK			-0.00191946	1231.61	616.811	1231.61	616.812	2	10	1.1.1.2720.4	1	56.7625	2506.32	56.8831
2	60.63	60.63	22.41	18.49	16.83	tr|A6NG51|A6NG51_HUMAN; sp|Q13813|SPTN1_HUMAN	Spectrin alpha chain, non-erythrocytic 1 OS=Homo sapiens GN=SPTAN1 PE=2 SV=2; Spectrin alpha chain, non-erythrocytic 1 OS=Homo sapiens GN=SPTAN1 PE=1 SV=3			0	99	ASAFNSWFENAEEDLTDPVR			0.000835022	2297.03	1149.52	2297.02	1149.52	2	14	1.1.1.3242.12	1	78.8282	2773.93	78.7632
2	60.63	60.63	22.41	18.49	16.83	tr|A6NG51|A6NG51_HUMAN; sp|Q13813|SPTN1_HUMAN	Spectrin alpha chain, non-erythrocytic 1 OS=Homo sapiens GN=SPTAN1 PE=2 SV=2; Spectrin alpha chain, non-erythrocytic 1 OS=Homo sapiens GN=SPTAN1 PE=1 SV=3			0	99	DADETKEWIEEK		missed K-E@6	0.00150969	1491.67	746.845	1491.67	746.844	2	20	1.1.1.2287.21	1	38.5717	39846.8	38.7609
2	60.63	60.63	22.41	18.49	16.83	tr|A6NG51|A6NG51_HUMAN; sp|Q13813|SPTN1_HUMAN	Spectrin alpha chain, non-erythrocytic 1 OS=Homo sapiens GN=SPTAN1 PE=2 SV=2; Spectrin alpha chain, non-erythrocytic 1 OS=Homo sapiens GN=SPTAN1 PE=1 SV=3			0	99	DADETKEWIEEK		missed K-E@6	0.00150969	1491.67	746.845	1491.67	746.844	2	18	1.1.1.2303.23	1	39.2446	38430.6	38.8026
2	60.63	60.63	22.41	18.49	16.83	tr|A6NG51|A6NG51_HUMAN; sp|Q13813|SPTN1_HUMAN	Spectrin alpha chain, non-erythrocytic 1 OS=Homo sapiens GN=SPTAN1 PE=2 SV=2; Spectrin alpha chain, non-erythrocytic 1 OS=Homo sapiens GN=SPTAN1 PE=1 SV=3			0	99	DCEQAENWMAAR	Carbamidomethyl(C)@2		0.000395237	1479.59	740.801	1479.59	740.801	2	14	1.1.1.2456.18	1	45.672	39222.6	45.4448
2	60.63	60.63	22.41	18.49	16.83	tr|A6NG51|A6NG51_HUMAN; sp|Q13813|SPTN1_HUMAN	Spectrin alpha chain, non-erythrocytic 1 OS=Homo sapiens GN=SPTAN1 PE=2 SV=2; Spectrin alpha chain, non-erythrocytic 1 OS=Homo sapiens GN=SPTAN1 PE=1 SV=3			0	99	DCEQAENWMAAR	Carbamidomethyl(C)@2		0.000761449	1479.59	740.801	1479.59	740.801	2	12	1.1.1.2464.20	1	46.0096	26546.6	45.5704
2	60.63	60.63	22.41	18.49	16.83	tr|A6NG51|A6NG51_HUMAN; sp|Q13813|SPTN1_HUMAN	Spectrin alpha chain, non-erythrocytic 1 OS=Homo sapiens GN=SPTAN1 PE=2 SV=2; Spectrin alpha chain, non-erythrocytic 1 OS=Homo sapiens GN=SPTAN1 PE=1 SV=3			0	99	DCEQAENWMAAR	Carbamidomethyl(C)@2; Oxidation(M)@9		0.00134082	1495.58	748.799	1495.58	748.798	2	13	1.1.1.2116.26	1	31.4044	1662.27	31.3802
2	60.63	60.63	22.41	18.49	16.83	tr|A6NG51|A6NG51_HUMAN; sp|Q13813|SPTN1_HUMAN	Spectrin alpha chain, non-erythrocytic 1 OS=Homo sapiens GN=SPTAN1 PE=2 SV=2; Spectrin alpha chain, non-erythrocytic 1 OS=Homo sapiens GN=SPTAN1 PE=1 SV=3			0	99	DCEQAENWMAAR	Carbamidomethyl(C)@2		0.00698705	1479.59	740.804	1479.59	740.801	2	8	1.1.1.2472.16	1	46.3433	795.483	46.2849
2	60.63	60.63	22.41	18.49	16.83	tr|A6NG51|A6NG51_HUMAN; sp|Q13813|SPTN1_HUMAN	Spectrin alpha chain, non-erythrocytic 1 OS=Homo sapiens GN=SPTAN1 PE=2 SV=2; Spectrin alpha chain, non-erythrocytic 1 OS=Homo sapiens GN=SPTAN1 PE=1 SV=3			0	31.98	DLAALEDK			0.000383779	873.445	437.73	873.444	437.729	2	4	1.1.1.2193.2	1	34.609	1969.64	34.8148
2	60.63	60.63	22.41	18.49	16.83	tr|A6NG51|A6NG51_HUMAN; sp|Q13813|SPTN1_HUMAN	Spectrin alpha chain, non-erythrocytic 1 OS=Homo sapiens GN=SPTAN1 PE=2 SV=2; Spectrin alpha chain, non-erythrocytic 1 OS=Homo sapiens GN=SPTAN1 PE=1 SV=3			0	99	DLAALGDKVNSLGETAER		missed K-V@8	-0.000911489	1857.94	929.979	1857.94	929.979	2	15	1.1.1.2711.26	1	56.4002	16326.4	56.6713
2	60.63	60.63	22.41	18.49	16.83	tr|A6NG51|A6NG51_HUMAN; sp|Q13813|SPTN1_HUMAN	Spectrin alpha chain, non-erythrocytic 1 OS=Homo sapiens GN=SPTAN1 PE=2 SV=2; Spectrin alpha chain, non-erythrocytic 1 OS=Homo sapiens GN=SPTAN1 PE=1 SV=3			0	99	DLAALGDKVNSLGETAER		missed K-V@8	0.000859134	1857.94	620.322	1857.94	620.322	3	13	1.1.1.2719.2	1	56.7184	7148.15	56.6713
2	60.63	60.63	22.41	18.49	16.83	tr|A6NG51|A6NG51_HUMAN; sp|Q13813|SPTN1_HUMAN	Spectrin alpha chain, non-erythrocytic 1 OS=Homo sapiens GN=SPTAN1 PE=2 SV=2; Spectrin alpha chain, non-erythrocytic 1 OS=Homo sapiens GN=SPTAN1 PE=1 SV=3			0	99	DLAALGDKVNSLGETAER		missed K-V@8	-0.000911489	1857.94	929.979	1857.94	929.979	2	20	1.1.1.2721.26	1	56.8232	16326.4	56.6713
2	60.63	60.63	22.41	18.49	16.83	tr|A6NG51|A6NG51_HUMAN; sp|Q13813|SPTN1_HUMAN	Spectrin alpha chain, non-erythrocytic 1 OS=Homo sapiens GN=SPTAN1 PE=2 SV=2; Spectrin alpha chain, non-erythrocytic 1 OS=Homo sapiens GN=SPTAN1 PE=1 SV=3			0	99	DLAALGDKVNSLGETAER	Deamidated(N)@10	missed K-V@8	0.00807618	1858.94	930.475	1858.93	930.471	2	12	1.1.1.2806.15	1	60.385	1588.28	60.245
2	60.63	60.63	22.41	18.49	16.83	tr|A6NG51|A6NG51_HUMAN; sp|Q13813|SPTN1_HUMAN	Spectrin alpha chain, non-erythrocytic 1 OS=Homo sapiens GN=SPTAN1 PE=2 SV=2; Spectrin alpha chain, non-erythrocytic 1 OS=Homo sapiens GN=SPTAN1 PE=1 SV=3			0	98.6	DLAALGDKVNSLGETAER	Deamidated(N)@10	missed K-V@8	-0.0140315	1858.91	930.464	1858.93	930.471	2	11	1.1.1.2551.29	1	49.6759	994.266	49.6475
2	60.63	60.63	22.41	18.49	16.83	tr|A6NG51|A6NG51_HUMAN; sp|Q13813|SPTN1_HUMAN	Spectrin alpha chain, non-erythrocytic 1 OS=Homo sapiens GN=SPTAN1 PE=2 SV=2; Spectrin alpha chain, non-erythrocytic 1 OS=Homo sapiens GN=SPTAN1 PE=1 SV=3			0	53.34	DLAALGDKVNSLGETAER	Deamidated(N)@10	missed K-V@8	0.00941896	1858.94	930.476	1858.93	930.471	2	8	1.1.1.2798.14	1	60.0507	1904.37	59.9115
2	60.63	60.63	22.41	18.49	16.83	tr|A6NG51|A6NG51_HUMAN; sp|Q13813|SPTN1_HUMAN	Spectrin alpha chain, non-erythrocytic 1 OS=Homo sapiens GN=SPTAN1 PE=2 SV=2; Spectrin alpha chain, non-erythrocytic 1 OS=Homo sapiens GN=SPTAN1 PE=1 SV=3			0	99	DMDDEESWIK			0.000413824	1266.51	634.261	1266.51	634.261	2	11	1.1.1.2622.6	1	52.6496	47963.4	52.3475
2	60.63	60.63	22.41	18.49	16.83	tr|A6NG51|A6NG51_HUMAN; sp|Q13813|SPTN1_HUMAN	Spectrin alpha chain, non-erythrocytic 1 OS=Homo sapiens GN=SPTAN1 PE=2 SV=2; Spectrin alpha chain, non-erythrocytic 1 OS=Homo sapiens GN=SPTAN1 PE=1 SV=3			0	99	DMDDEESWIK			0.000413824	1266.51	634.261	1266.51	634.261	2	11	1.1.1.2614.7	1	52.3141	47963.4	52.3475
2	60.63	60.63	22.41	18.49	16.83	tr|A6NG51|A6NG51_HUMAN; sp|Q13813|SPTN1_HUMAN	Spectrin alpha chain, non-erythrocytic 1 OS=Homo sapiens GN=SPTAN1 PE=2 SV=2; Spectrin alpha chain, non-erythrocytic 1 OS=Homo sapiens GN=SPTAN1 PE=1 SV=3			0	98.54	DMDDEESWIK			0.0017566	1266.51	634.262	1266.51	634.261	2	10	1.1.1.2606.4	1	51.9743	48084.7	52.3895
2	60.63	60.63	22.41	18.49	16.83	tr|A6NG51|A6NG51_HUMAN; sp|Q13813|SPTN1_HUMAN	Spectrin alpha chain, non-erythrocytic 1 OS=Homo sapiens GN=SPTAN1 PE=2 SV=2; Spectrin alpha chain, non-erythrocytic 1 OS=Homo sapiens GN=SPTAN1 PE=1 SV=3			0	97.97	DMDDEESWIK			-0.000196529	1266.51	634.261	1266.51	634.261	2	8	1.1.1.2630.7	1	52.9866	20337.4	52.5577
2	60.63	60.63	22.41	18.49	16.83	tr|A6NG51|A6NG51_HUMAN; sp|Q13813|SPTN1_HUMAN	Spectrin alpha chain, non-erythrocytic 1 OS=Homo sapiens GN=SPTAN1 PE=2 SV=2; Spectrin alpha chain, non-erythrocytic 1 OS=Homo sapiens GN=SPTAN1 PE=1 SV=3			0	35.85	DMDDEESWIK	Oxidation(M)@2		0.000455161	1282.5	642.259	1282.5	642.258	2	6	1.1.1.2406.9	1	43.5622	3831.35	43.8042
2	60.63	60.63	22.41	18.49	16.83	tr|A6NG51|A6NG51_HUMAN; sp|Q13813|SPTN1_HUMAN	Spectrin alpha chain, non-erythrocytic 1 OS=Homo sapiens GN=SPTAN1 PE=2 SV=2; Spectrin alpha chain, non-erythrocytic 1 OS=Homo sapiens GN=SPTAN1 PE=1 SV=3			0	99	DTEQVDNWMSK			0.000992341	1351.57	676.793	1351.57	676.793	2	11	1.1.1.2437.13	1	44.8712	21648	44.647
2	60.63	60.63	22.41	18.49	16.83	tr|A6NG51|A6NG51_HUMAN; sp|Q13813|SPTN1_HUMAN	Spectrin alpha chain, non-erythrocytic 1 OS=Homo sapiens GN=SPTAN1 PE=2 SV=2; Spectrin alpha chain, non-erythrocytic 1 OS=Homo sapiens GN=SPTAN1 PE=1 SV=3			0	99	DTEQVDNWMSK	Deamidated(N)@7		0.00611482	1352.56	677.288	1352.56	677.285	2	7	1.1.1.2497.15	1	47.3934	583.13	47.378
2	60.63	60.63	22.41	18.49	16.83	tr|A6NG51|A6NG51_HUMAN; sp|Q13813|SPTN1_HUMAN	Spectrin alpha chain, non-erythrocytic 1 OS=Homo sapiens GN=SPTAN1 PE=2 SV=2; Spectrin alpha chain, non-erythrocytic 1 OS=Homo sapiens GN=SPTAN1 PE=1 SV=3			0	23.06	DTEQVDNWMSK			0.000748199	1351.57	676.793	1351.57	676.793	2	6	1.1.1.2421.14	1	44.1979	19227.8	44.6048
2	60.63	60.63	22.41	18.49	16.83	tr|A6NG51|A6NG51_HUMAN; sp|Q13813|SPTN1_HUMAN	Spectrin alpha chain, non-erythrocytic 1 OS=Homo sapiens GN=SPTAN1 PE=2 SV=2; Spectrin alpha chain, non-erythrocytic 1 OS=Homo sapiens GN=SPTAN1 PE=1 SV=3			0	99	DVEDEETWIR			-0.00157243	1290.57	646.293	1290.57	646.294	2	12	1.1.1.2587.4	1	51.1712	49579.4	51.2495
2	60.63	60.63	22.41	18.49	16.83	tr|A6NG51|A6NG51_HUMAN; sp|Q13813|SPTN1_HUMAN	Spectrin alpha chain, non-erythrocytic 1 OS=Homo sapiens GN=SPTAN1 PE=2 SV=2; Spectrin alpha chain, non-erythrocytic 1 OS=Homo sapiens GN=SPTAN1 PE=1 SV=3			0	99	DVEDEETWIR			-0.00157243	1290.57	646.293	1290.57	646.294	2	12	1.1.1.2595.9	1	51.5138	49579.4	51.2495
2	60.63	60.63	22.41	18.49	16.83	tr|A6NG51|A6NG51_HUMAN; sp|Q13813|SPTN1_HUMAN	Spectrin alpha chain, non-erythrocytic 1 OS=Homo sapiens GN=SPTAN1 PE=2 SV=2; Spectrin alpha chain, non-erythrocytic 1 OS=Homo sapiens GN=SPTAN1 PE=1 SV=3			0	98.19	DVEDEETWIR			0.00636216	1290.58	646.297	1290.57	646.294	2	7	1.1.1.2619.7	1	52.5243	1863.19	52.0946
2	60.63	60.63	22.41	18.49	16.83	tr|A6NG51|A6NG51_HUMAN; sp|Q13813|SPTN1_HUMAN	Spectrin alpha chain, non-erythrocytic 1 OS=Homo sapiens GN=SPTAN1 PE=2 SV=2; Spectrin alpha chain, non-erythrocytic 1 OS=Homo sapiens GN=SPTAN1 PE=1 SV=3			0	97.72	DVEDEETWIR			-0.00132829	1290.57	646.293	1290.57	646.294	2	8	1.1.1.2579.6	1	50.834	48441.4	51.2495
2	60.63	60.63	22.41	18.49	16.83	tr|A6NG51|A6NG51_HUMAN; sp|Q13813|SPTN1_HUMAN	Spectrin alpha chain, non-erythrocytic 1 OS=Homo sapiens GN=SPTAN1 PE=2 SV=2; Spectrin alpha chain, non-erythrocytic 1 OS=Homo sapiens GN=SPTAN1 PE=1 SV=3			0	46.98	DVEDEETWIR			0.00147934	1290.57	646.294	1290.57	646.294	2	6	1.1.1.2611.9	1	52.1894	4370.59	51.7571
2	60.63	60.63	22.41	18.49	16.83	tr|A6NG51|A6NG51_HUMAN; sp|Q13813|SPTN1_HUMAN	Spectrin alpha chain, non-erythrocytic 1 OS=Homo sapiens GN=SPTAN1 PE=2 SV=2; Spectrin alpha chain, non-erythrocytic 1 OS=Homo sapiens GN=SPTAN1 PE=1 SV=3			0	99	DVTGAEALLER			-0.000433443	1172.6	587.309	1172.6	587.309	2	13	1.1.1.2636.3	1	53.2352	31935.5	53.356
2	60.63	60.63	22.41	18.49	16.83	tr|A6NG51|A6NG51_HUMAN; sp|Q13813|SPTN1_HUMAN	Spectrin alpha chain, non-erythrocytic 1 OS=Homo sapiens GN=SPTAN1 PE=2 SV=2; Spectrin alpha chain, non-erythrocytic 1 OS=Homo sapiens GN=SPTAN1 PE=1 SV=3			0	99	DVTGAEALLER			-0.000433443	1172.6	587.309	1172.6	587.309	2	12	1.1.1.2644.3	1	53.5712	31935.5	53.356
2	60.63	60.63	22.41	18.49	16.83	tr|A6NG51|A6NG51_HUMAN; sp|Q13813|SPTN1_HUMAN	Spectrin alpha chain, non-erythrocytic 1 OS=Homo sapiens GN=SPTAN1 PE=2 SV=2; Spectrin alpha chain, non-erythrocytic 1 OS=Homo sapiens GN=SPTAN1 PE=1 SV=3			0	99	DVTGAEALLER			-0.000677584	1172.6	587.309	1172.6	587.309	2	8	1.1.1.2628.2	1	52.8984	27633.9	53.314
2	60.63	60.63	22.41	18.49	16.83	tr|A6NG51|A6NG51_HUMAN; sp|Q13813|SPTN1_HUMAN	Spectrin alpha chain, non-erythrocytic 1 OS=Homo sapiens GN=SPTAN1 PE=2 SV=2; Spectrin alpha chain, non-erythrocytic 1 OS=Homo sapiens GN=SPTAN1 PE=1 SV=3			0	99	EAALTSEEVGADLEQVEVLQK			-0.00221784	2257.13	1129.57	2257.13	1129.57	2	13	1.1.1.3121.30	1	73.7085	21929.4	73.4671
2	60.63	60.63	22.41	18.49	16.83	tr|A6NG51|A6NG51_HUMAN; sp|Q13813|SPTN1_HUMAN	Spectrin alpha chain, non-erythrocytic 1 OS=Homo sapiens GN=SPTAN1 PE=2 SV=2; Spectrin alpha chain, non-erythrocytic 1 OS=Homo sapiens GN=SPTAN1 PE=1 SV=3			0	99	EKEPIVGSTDYGKDEDSAEALLK		missed K-E@2; missed K-D@13	0.00438726	2493.22	832.08	2493.21	832.078	3	13	1.1.1.2638.21	1	53.3342	13608.2	53.104
2	60.63	60.63	22.41	18.49	16.83	tr|A6NG51|A6NG51_HUMAN; sp|Q13813|SPTN1_HUMAN	Spectrin alpha chain, non-erythrocytic 1 OS=Homo sapiens GN=SPTAN1 PE=2 SV=2; Spectrin alpha chain, non-erythrocytic 1 OS=Homo sapiens GN=SPTAN1 PE=1 SV=3			0	94.75	EKEPIVGSTDYGKDEDSAEALLK		missed K-E@2; missed K-D@13	0.00438726	2493.22	832.08	2493.21	832.078	3	10	1.1.1.2622.21	1	52.6621	12569.5	53.062
2	60.63	60.63	22.41	18.49	16.83	tr|A6NG51|A6NG51_HUMAN; sp|Q13813|SPTN1_HUMAN	Spectrin alpha chain, non-erythrocytic 1 OS=Homo sapiens GN=SPTAN1 PE=2 SV=2; Spectrin alpha chain, non-erythrocytic 1 OS=Homo sapiens GN=SPTAN1 PE=1 SV=3			0	88.42	EKEPIVGSTDYGKDEDSAEALLK		missed K-E@2; missed K-D@13	0.00438726	2493.22	832.08	2493.21	832.078	3	10	1.1.1.2630.21	1	52.9982	13608.2	53.104
2	60.63	60.63	22.41	18.49	16.83	tr|A6NG51|A6NG51_HUMAN; sp|Q13813|SPTN1_HUMAN	Spectrin alpha chain, non-erythrocytic 1 OS=Homo sapiens GN=SPTAN1 PE=2 SV=2; Spectrin alpha chain, non-erythrocytic 1 OS=Homo sapiens GN=SPTAN1 PE=1 SV=3			0	99	EKEQLMASDDFGR		missed K-E@2	0.00117169	1524.69	509.237	1524.69	509.237	3	8	1.1.1.2216.6	1	35.5817	1910.53	35.6581
2	60.63	60.63	22.41	18.49	16.83	tr|A6NG51|A6NG51_HUMAN; sp|Q13813|SPTN1_HUMAN	Spectrin alpha chain, non-erythrocytic 1 OS=Homo sapiens GN=SPTAN1 PE=2 SV=2; Spectrin alpha chain, non-erythrocytic 1 OS=Homo sapiens GN=SPTAN1 PE=1 SV=3			0	99	EKEQLMASDDFGR		missed K-E@2	-0.0036976	1524.68	763.349	1524.69	763.351	2	12	1.1.1.2219.24	1	35.7233	2513.26	35.6581
2	60.63	60.63	22.41	18.49	16.83	tr|A6NG51|A6NG51_HUMAN; sp|Q13813|SPTN1_HUMAN	Spectrin alpha chain, non-erythrocytic 1 OS=Homo sapiens GN=SPTAN1 PE=2 SV=2; Spectrin alpha chain, non-erythrocytic 1 OS=Homo sapiens GN=SPTAN1 PE=1 SV=3			0	96.02	EKEQLMASDDFGR		missed K-E@2	0.00117169	1524.69	509.237	1524.69	509.237	3	7	1.1.1.2218.3	1	35.6636	1910.53	35.6581
2	60.63	60.63	22.41	18.49	16.83	tr|A6NG51|A6NG51_HUMAN; sp|Q13813|SPTN1_HUMAN	Spectrin alpha chain, non-erythrocytic 1 OS=Homo sapiens GN=SPTAN1 PE=2 SV=2; Spectrin alpha chain, non-erythrocytic 1 OS=Homo sapiens GN=SPTAN1 PE=1 SV=3			0	99	EQLMASDDFGR			0.00133773	1267.55	634.783	1267.55	634.782	2	11	1.1.1.2367.3	1	41.9161	8133.51	41.8694
2	60.63	60.63	22.41	18.49	16.83	tr|A6NG51|A6NG51_HUMAN; sp|Q13813|SPTN1_HUMAN	Spectrin alpha chain, non-erythrocytic 1 OS=Homo sapiens GN=SPTAN1 PE=2 SV=2; Spectrin alpha chain, non-erythrocytic 1 OS=Homo sapiens GN=SPTAN1 PE=1 SV=3			0	99	LDILDQER			-0.000122625	1000.52	501.267	1000.52	501.267	2	8	1.1.1.2382.3	1	42.5473	4912.43	42.8374
2	60.63	60.63	22.41	18.49	16.83	tr|A6NG51|A6NG51_HUMAN; sp|Q13813|SPTN1_HUMAN	Spectrin alpha chain, non-erythrocytic 1 OS=Homo sapiens GN=SPTAN1 PE=2 SV=2; Spectrin alpha chain, non-erythrocytic 1 OS=Homo sapiens GN=SPTAN1 PE=1 SV=3			0	99	LDILDQER			-0.000122625	1000.52	501.267	1000.52	501.267	2	9	1.1.1.2390.2	1	42.8843	4912.43	42.8374
2	60.63	60.63	22.41	18.49	16.83	tr|A6NG51|A6NG51_HUMAN; sp|Q13813|SPTN1_HUMAN	Spectrin alpha chain, non-erythrocytic 1 OS=Homo sapiens GN=SPTAN1 PE=2 SV=2; Spectrin alpha chain, non-erythrocytic 1 OS=Homo sapiens GN=SPTAN1 PE=1 SV=3			0	96.58	LSDDNTIGKEEIQQR		missed K-E@9	0.0017108	1744.86	582.628	1744.86	582.627	3	11	1.1.1.2051.8	1	28.6697	17247.1	28.578
2	60.63	60.63	22.41	18.49	16.83	tr|A6NG51|A6NG51_HUMAN; sp|Q13813|SPTN1_HUMAN	Spectrin alpha chain, non-erythrocytic 1 OS=Homo sapiens GN=SPTAN1 PE=2 SV=2; Spectrin alpha chain, non-erythrocytic 1 OS=Homo sapiens GN=SPTAN1 PE=1 SV=3			0	71.37	LSDDNTIGKEEIQQR	Deamidated(N)@5	missed K-E@9	0.0111688	1745.85	873.934	1745.84	873.929	2	8	1.1.1.2043.24	1	28.3624	1202.56	28.578
2	60.63	60.63	22.41	18.49	16.83	tr|A6NG51|A6NG51_HUMAN; sp|Q13813|SPTN1_HUMAN	Spectrin alpha chain, non-erythrocytic 1 OS=Homo sapiens GN=SPTAN1 PE=2 SV=2; Spectrin alpha chain, non-erythrocytic 1 OS=Homo sapiens GN=SPTAN1 PE=1 SV=3			0	45.37	LSDDNTIGKEEIQQR		missed K-E@9	0.0017108	1744.86	582.628	1744.86	582.627	3	9	1.1.1.2043.11	1	28.3407	17247.1	28.578
2	60.63	60.63	22.41	18.49	16.83	tr|A6NG51|A6NG51_HUMAN; sp|Q13813|SPTN1_HUMAN	Spectrin alpha chain, non-erythrocytic 1 OS=Homo sapiens GN=SPTAN1 PE=2 SV=2; Spectrin alpha chain, non-erythrocytic 1 OS=Homo sapiens GN=SPTAN1 PE=1 SV=3			0	99	SADESGQALLAAGHYASDEVR			0.00455974	2146	716.34	2145.99	716.338	3	16	1.1.1.2674.11	1	54.8331	7402.35	54.6958
2	60.63	60.63	22.41	18.49	16.83	tr|A6NG51|A6NG51_HUMAN; sp|Q13813|SPTN1_HUMAN	Spectrin alpha chain, non-erythrocytic 1 OS=Homo sapiens GN=SPTAN1 PE=2 SV=2; Spectrin alpha chain, non-erythrocytic 1 OS=Homo sapiens GN=SPTAN1 PE=1 SV=3			0	99	SLQQLAEER	Phospho(S)@1		-0.00351791	1152.51	577.264	1152.52	577.266	2	9	1.1.1.2333.8	1	40.4982	2251.24	40.6152
2	60.63	60.63	22.41	18.49	16.83	tr|A6NG51|A6NG51_HUMAN; sp|Q13813|SPTN1_HUMAN	Spectrin alpha chain, non-erythrocytic 1 OS=Homo sapiens GN=SPTAN1 PE=2 SV=2; Spectrin alpha chain, non-erythrocytic 1 OS=Homo sapiens GN=SPTAN1 PE=1 SV=3			0	46.52	SSEEIESAFR			-0.00077573	1153.52	577.769	1153.53	577.77	2	5	1.1.1.2318.4	1	39.8614	5022.12	40.2777
2	60.63	60.63	22.41	18.49	16.83	tr|A6NG51|A6NG51_HUMAN; sp|Q13813|SPTN1_HUMAN	Spectrin alpha chain, non-erythrocytic 1 OS=Homo sapiens GN=SPTAN1 PE=2 SV=2; Spectrin alpha chain, non-erythrocytic 1 OS=Homo sapiens GN=SPTAN1 PE=1 SV=3			0	99	VLETAEDIQER			-0.000784928	1301.65	651.83	1301.65	651.83	2	12	1.1.1.2133.15	1	32.1083	14323.8	31.674
2	60.63	60.63	22.41	18.49	16.83	tr|A6NG51|A6NG51_HUMAN; sp|Q13813|SPTN1_HUMAN	Spectrin alpha chain, non-erythrocytic 1 OS=Homo sapiens GN=SPTAN1 PE=2 SV=2; Spectrin alpha chain, non-erythrocytic 1 OS=Homo sapiens GN=SPTAN1 PE=1 SV=3			0	99	VLETAEDIQER			6.95651e-05	1301.65	651.83	1301.65	651.83	2	13	1.1.1.2125.19	1	31.7765	23666.7	31.632
2	60.63	60.63	22.41	18.49	16.83	tr|A6NG51|A6NG51_HUMAN; sp|Q13813|SPTN1_HUMAN	Spectrin alpha chain, non-erythrocytic 1 OS=Homo sapiens GN=SPTAN1 PE=2 SV=2; Spectrin alpha chain, non-erythrocytic 1 OS=Homo sapiens GN=SPTAN1 PE=1 SV=3			0	99	VLETAEDIQER			6.95651e-05	1301.65	651.83	1301.65	651.83	2	11	1.1.1.2109.16	1	31.1039	47120.9	31.422
2	60.63	60.63	22.41	18.49	16.83	tr|A6NG51|A6NG51_HUMAN; sp|Q13813|SPTN1_HUMAN	Spectrin alpha chain, non-erythrocytic 1 OS=Homo sapiens GN=SPTAN1 PE=2 SV=2; Spectrin alpha chain, non-erythrocytic 1 OS=Homo sapiens GN=SPTAN1 PE=1 SV=3			0	99	VLETAEDIQER			0.00409789	1301.65	651.832	1301.65	651.83	2	11	1.1.1.2151.17	1	32.8623	1973.85	32.7193
2	60.63	60.63	22.41	18.49	16.83	tr|A6NG51|A6NG51_HUMAN; sp|Q13813|SPTN1_HUMAN	Spectrin alpha chain, non-erythrocytic 1 OS=Homo sapiens GN=SPTAN1 PE=2 SV=2; Spectrin alpha chain, non-erythrocytic 1 OS=Homo sapiens GN=SPTAN1 PE=1 SV=3			0	99	VLETAEDIQER			0.00348754	1301.65	651.832	1301.65	651.83	2	12	1.1.1.2141.12	1	32.4398	2248.42	32.4266
2	60.63	60.63	22.41	18.49	16.83	tr|A6NG51|A6NG51_HUMAN; sp|Q13813|SPTN1_HUMAN	Spectrin alpha chain, non-erythrocytic 1 OS=Homo sapiens GN=SPTAN1 PE=2 SV=2; Spectrin alpha chain, non-erythrocytic 1 OS=Homo sapiens GN=SPTAN1 PE=1 SV=3			0	23.26	VLETAEDIQER			-0.00900887	1301.64	651.826	1301.65	651.83	2	8	1.1.1.2159.21	1	33.2028	2013.38	33.2666
3	50.14	50.14	19.63	18.02	12.69	sp|Q01082|SPTB2_HUMAN	Spectrin beta chain, non-erythrocytic 1 OS=Homo sapiens GN=SPTBN1 PE=1 SV=2			2	99	DLDDFQSWLSR			-0.000690218	1380.63	691.322	1380.63	691.323	2	13	1.1.1.3131.2	1	74.1093	2591.4	74.1891
3	50.14	50.14	19.63	18.02	12.69	sp|Q01082|SPTB2_HUMAN	Spectrin beta chain, non-erythrocytic 1 OS=Homo sapiens GN=SPTBN1 PE=1 SV=2			2	99	DVEDEILWVGER			-0.000203876	1458.7	730.357	1458.7	730.357	2	17	1.1.1.3125.6	1	73.8581	40001.1	73.9774
3	50.14	50.14	19.63	18.02	12.69	sp|Q01082|SPTB2_HUMAN	Spectrin beta chain, non-erythrocytic 1 OS=Homo sapiens GN=SPTBN1 PE=1 SV=2			2	99	EAEKLESEHPDQAQAILSR		missed K-L@4	0.0022429	2150.06	717.695	2150.06	717.694	3	18	1.1.1.2214.24	1	35.512	22413.7	35.6159
3	50.14	50.14	19.63	18.02	12.69	sp|Q01082|SPTB2_HUMAN	Spectrin beta chain, non-erythrocytic 1 OS=Homo sapiens GN=SPTBN1 PE=1 SV=2			2	99	EAVCEVALDYK	Carbamidomethyl(C)@4		-0.00064814	1295.61	648.81	1295.61	648.811	2	10	1.1.1.2432.11	1	44.659	2007.02	44.7735
3	50.14	50.14	19.63	18.02	12.69	sp|Q01082|SPTB2_HUMAN	Spectrin beta chain, non-erythrocytic 1 OS=Homo sapiens GN=SPTBN1 PE=1 SV=2			2	99	EGEDMIAEEHFGSEK			-0.00044583	1706.71	854.362	1706.71	854.362	2	17	1.1.1.2336.33	1	40.6456	14281.2	40.573
3	50.14	50.14	19.63	18.02	12.69	sp|Q01082|SPTB2_HUMAN	Spectrin beta chain, non-erythrocytic 1 OS=Homo sapiens GN=SPTBN1 PE=1 SV=2			2	99	EIEELQSQAQALSQEGK			-0.000458262	1886.92	944.468	1886.92	944.468	2	17	1.1.1.2564.37	1	50.2266	90538.5	50.5307
3	50.14	50.14	19.63	18.02	12.69	sp|Q01082|SPTB2_HUMAN	Spectrin beta chain, non-erythrocytic 1 OS=Homo sapiens GN=SPTBN1 PE=1 SV=2			2	99	EIGQSVDEVEK			0.000231194	1231.59	616.804	1231.59	616.804	2	12	1.1.1.2002.14	1	26.6398	74069.1	26.9141
3	50.14	50.14	19.63	18.02	12.69	sp|Q01082|SPTB2_HUMAN	Spectrin beta chain, non-erythrocytic 1 OS=Homo sapiens GN=SPTBN1 PE=1 SV=2			2	99	ELEAENYHDIK			0.00113506	1359.63	680.823	1359.63	680.823	2	12	1.1.1.2026.24	1	27.6416	6621.28	27.7449
3	50.14	50.14	19.63	18.02	12.69	sp|Q01082|SPTB2_HUMAN	Spectrin beta chain, non-erythrocytic 1 OS=Homo sapiens GN=SPTBN1 PE=1 SV=2			2	99	ENEVLEAWK			0.000120413	1116.55	559.28	1116.55	559.28	2	6	1.1.1.2551.2	1	49.6517	8957.18	49.2289
3	50.14	50.14	19.63	18.02	12.69	sp|Q01082|SPTB2_HUMAN	Spectrin beta chain, non-erythrocytic 1 OS=Homo sapiens GN=SPTBN1 PE=1 SV=2			2	99	EVDDLEQWIAER			0.00811056	1501.71	751.864	1501.7	751.86	2	8	1.1.1.3462.12	1	87.8886	221.601	87.9178
3	50.14	50.14	19.63	18.02	12.69	sp|Q01082|SPTB2_HUMAN	Spectrin beta chain, non-erythrocytic 1 OS=Homo sapiens GN=SPTBN1 PE=1 SV=2			2	99	EVVAGSHELGQDYEHVTMLQER			0.00122341	2526.18	843.068	2526.18	843.068	3	12	1.1.1.2568.23	1	50.3837	5088.04	50.4038
3	50.14	50.14	19.63	18.02	12.69	sp|Q01082|SPTB2_HUMAN	Spectrin beta chain, non-erythrocytic 1 OS=Homo sapiens GN=SPTBN1 PE=1 SV=2			2	99	FESLEPEMNNQASR			0.0018053	1650.73	826.374	1650.73	826.373	2	15	1.1.1.2351.23	1	41.2647	11205.6	41.0346
3	50.14	50.14	19.63	18.02	12.69	sp|Q01082|SPTB2_HUMAN	Spectrin beta chain, non-erythrocytic 1 OS=Homo sapiens GN=SPTBN1 PE=1 SV=2			2	99	IDDIFER			0.000640057	906.445	454.23	906.445	454.23	2	8	1.1.1.2437.2	1	44.862	20860.1	45.1514
3	50.14	50.14	19.63	18.02	12.69	sp|Q01082|SPTB2_HUMAN	Spectrin beta chain, non-erythrocytic 1 OS=Homo sapiens GN=SPTBN1 PE=1 SV=2			2	99	LAEISDVWEEMK			-0.00138348	1448.68	725.349	1448.69	725.35	2	13	1.1.1.3085.6	1	72.1582	8737.63	72.4473
3	50.14	50.14	19.63	18.02	12.69	sp|Q01082|SPTB2_HUMAN	Spectrin beta chain, non-erythrocytic 1 OS=Homo sapiens GN=SPTBN1 PE=1 SV=2			2	99	LVSDGNINSDR			-0.00168613	1188.57	595.293	1188.57	595.294	2	9	1.1.1.1868.13	1	21.0334	10566.5	21.23
3	50.14	50.14	19.63	18.02	12.69	sp|Q01082|SPTB2_HUMAN	Spectrin beta chain, non-erythrocytic 1 OS=Homo sapiens GN=SPTBN1 PE=1 SV=2			2	99	MAETVDTSEMVNGATEQR	Deamidated(N)@12		-0.000959946	1968.84	985.427	1968.84	985.427	2	15	1.1.1.2317.37	1	39.8468	2429.62	39.7287
3	50.14	50.14	19.63	18.02	12.69	sp|Q01082|SPTB2_HUMAN	Spectrin beta chain, non-erythrocytic 1 OS=Homo sapiens GN=SPTBN1 PE=1 SV=2			2	99	MLTAQDMSYDEAR			-0.00184917	1529.65	765.831	1529.65	765.832	2	16	1.1.1.2393.24	1	43.0291	13273.7	43.0484
3	50.14	50.14	19.63	18.02	12.69	sp|Q01082|SPTB2_HUMAN	Spectrin beta chain, non-erythrocytic 1 OS=Homo sapiens GN=SPTBN1 PE=1 SV=2			2	99	NEIDNYEEDYQK			-0.00118777	1558.64	780.328	1558.64	780.328	2	13	1.1.1.2307.24	1	39.4143	6690.44	39.3914
3	50.14	50.14	19.63	18.02	12.69	sp|Q01082|SPTB2_HUMAN	Spectrin beta chain, non-erythrocytic 1 OS=Homo sapiens GN=SPTBN1 PE=1 SV=2			2	99	TQTAIASEDMPNTLTEAEK			0.000252681	2048.96	1025.49	2048.96	1025.49	2	19	1.1.1.2515.36	1	48.1668	40071.4	48.2604
3	50.14	50.14	19.63	18.02	12.69	sp|Q01082|SPTB2_HUMAN	Spectrin beta chain, non-erythrocytic 1 OS=Homo sapiens GN=SPTBN1 PE=1 SV=2			2	99	VLDNAIETEK			4.97784e-05	1130.58	566.298	1130.58	566.298	2	10	1.1.1.2011.10	1	27.0074	5702.18	27.2037
3	50.14	50.14	19.63	18.02	12.69	sp|Q01082|SPTB2_HUMAN	Spectrin beta chain, non-erythrocytic 1 OS=Homo sapiens GN=SPTBN1 PE=1 SV=2			1.72125	98.16	LLDPEDISVDHPDEK			-0.00729076	1720.81	861.411	1720.82	861.415	2	10	1.1.1.2483.29	1	46.8154	4432.14	46.8305
3	50.14	50.14	19.63	18.02	12.69	sp|Q01082|SPTB2_HUMAN	Spectrin beta chain, non-erythrocytic 1 OS=Homo sapiens GN=SPTBN1 PE=1 SV=2			1.69897	98.02	AFEDEMSGR			-0.00112484	1040.42	521.218	1040.42	521.219	2	9	1.1.1.2068.7	1	29.3735	8323.96	29.6986
3	50.14	50.14	19.63	18.02	12.69	sp|Q01082|SPTB2_HUMAN	Spectrin beta chain, non-erythrocytic 1 OS=Homo sapiens GN=SPTBN1 PE=1 SV=2			1.69897	98	DQNTVETLQR			-0.00109179	1202.59	602.301	1202.59	602.302	2	11	1.1.1.1940.17	1	24.0498	9113.85	23.9489
3	50.14	50.14	19.63	18.02	12.69	sp|Q01082|SPTB2_HUMAN	Spectrin beta chain, non-erythrocytic 1 OS=Homo sapiens GN=SPTBN1 PE=1 SV=2			1.284	94.88	SLLDACESR	Carbamidomethyl(C)@6		-0.00207735	1049.48	525.747	1049.48	525.748	2	8	1.1.1.2108.4	1	31.0522	4304.06	31.4638
3	50.14	50.14	19.63	18.02	12.69	sp|Q01082|SPTB2_HUMAN	Spectrin beta chain, non-erythrocytic 1 OS=Homo sapiens GN=SPTBN1 PE=1 SV=2			1.18046	93.46	DVAEEIANYRPTLDTLHEQASALPQEHAESPDVR			0.00596437	3800.83	951.215	3800.82	951.213	4	11	1.1.1.3004.22	1	68.7537	5951.62	68.9428
3	50.14	50.14	19.63	18.02	12.69	sp|Q01082|SPTB2_HUMAN	Spectrin beta chain, non-erythrocytic 1 OS=Homo sapiens GN=SPTBN1 PE=1 SV=2			0.924453	88.32	TQETPSAQMEGFLNR			-0.012189	1707.78	854.895	1707.79	854.902	2	8	1.1.1.2736.20	1	57.4527	1632.92	57.3066
3	50.14	50.14	19.63	18.02	12.69	sp|Q01082|SPTB2_HUMAN	Spectrin beta chain, non-erythrocytic 1 OS=Homo sapiens GN=SPTBN1 PE=1 SV=2			0.562249	86.82	ESSPIPSPTSDRK	Phospho(S)@3; Phospho(S)@10	missed R-K@12	-0.00627995	1559.62	780.818	1559.63	780.821	2	7	1.1.1.1866.27	1	20.9611	1859.93	20.8517
3	50.14	50.14	19.63	18.02	12.69	sp|Q01082|SPTB2_HUMAN	Spectrin beta chain, non-erythrocytic 1 OS=Homo sapiens GN=SPTBN1 PE=1 SV=2			0.383	59.03	DASVAEAWLLGQEPYLSSR			-0.000627912	2091.03	1046.52	2091.03	1046.52	2	8	1.1.1.3198.18	1	76.9695	7045.71	76.7418
3	50.14	50.14	19.63	18.02	12.69	sp|Q01082|SPTB2_HUMAN	Spectrin beta chain, non-erythrocytic 1 OS=Homo sapiens GN=SPTBN1 PE=1 SV=2			0.355561	87.46	TSSKESSPIPSPTSDRK	Phospho(S)@3; Phospho(S)@7; Phospho(S)@11	missed K-E@4; missed R-K@16	0.00763609	2042.81	1022.41	2042.8	1022.41	2	8	1.1.1.1861.41	1	20.7623	456.903	20.7252
3	50.14	50.14	19.63	18.02	12.69	sp|Q01082|SPTB2_HUMAN	Spectrin beta chain, non-erythrocytic 1 OS=Homo sapiens GN=SPTBN1 PE=1 SV=2			0.229148	75.03	VSEEAESQQQWDTSKGEQVSQNGLPAEQGSPR	Deamidated(N)@22	missed K-G@15	-0.00346608	3486.57	1163.2	3486.58	1163.2	3	11	1.1.1.2347.33	1	41.113	2111.74	41.1598
3	50.14	50.14	19.63	18.02	12.69	sp|Q01082|SPTB2_HUMAN	Spectrin beta chain, non-erythrocytic 1 OS=Homo sapiens GN=SPTBN1 PE=1 SV=2			0.0990869	20.7	ETWLSENQR			0.00685275	1161.55	581.781	1161.54	581.778	2	6	1.1.1.2190.9	0	34.4889	2264.3	34.4787
3	50.14	50.14	19.63	18.02	12.69	sp|Q01082|SPTB2_HUMAN	Spectrin beta chain, non-erythrocytic 1 OS=Homo sapiens GN=SPTBN1 PE=1 SV=2			0	73.57	AFEDEMSGR			-0.00112484	1040.42	521.218	1040.42	521.219	2	9	1.1.1.2076.7	1	29.7071	8400.05	29.6986
3	50.14	50.14	19.63	18.02	12.69	sp|Q01082|SPTB2_HUMAN	Spectrin beta chain, non-erythrocytic 1 OS=Homo sapiens GN=SPTBN1 PE=1 SV=2			0	49.36	AFEDEMSGR			-0.00112484	1040.42	521.218	1040.42	521.219	2	8	1.1.1.2079.11	1	29.8366	8400.05	29.6986
3	50.14	50.14	19.63	18.02	12.69	sp|Q01082|SPTB2_HUMAN	Spectrin beta chain, non-erythrocytic 1 OS=Homo sapiens GN=SPTBN1 PE=1 SV=2			0	99	DLDDFQSWLSR			0.00175119	1380.63	691.324	1380.63	691.323	2	12	1.1.1.3167.2	1	75.6382	111792	75.8038
3	50.14	50.14	19.63	18.02	12.69	sp|Q01082|SPTB2_HUMAN	Spectrin beta chain, non-erythrocytic 1 OS=Homo sapiens GN=SPTBN1 PE=1 SV=2			0	99	DLDDFQSWLSR			-0.00142264	1380.63	691.322	1380.63	691.323	2	10	1.1.1.3192.2	1	76.7041	933.772	76.6991
3	50.14	50.14	19.63	18.02	12.69	sp|Q01082|SPTB2_HUMAN	Spectrin beta chain, non-erythrocytic 1 OS=Homo sapiens GN=SPTBN1 PE=1 SV=2			0	99	DLDDFQSWLSR			-7.98663e-05	1380.63	691.323	1380.63	691.323	2	12	1.1.1.3183.3	1	76.3205	39769.3	75.889
3	50.14	50.14	19.63	18.02	12.69	sp|Q01082|SPTB2_HUMAN	Spectrin beta chain, non-erythrocytic 1 OS=Homo sapiens GN=SPTBN1 PE=1 SV=2			0	99	DLDDFQSWLSR			0.00175119	1380.63	691.324	1380.63	691.323	2	12	1.1.1.3175.2	1	75.9785	111792	75.8038
3	50.14	50.14	19.63	18.02	12.69	sp|Q01082|SPTB2_HUMAN	Spectrin beta chain, non-erythrocytic 1 OS=Homo sapiens GN=SPTBN1 PE=1 SV=2			0	99	DLDDFQSWLSR			-0.00191827	1380.63	691.322	1380.63	691.323	2	7	1.1.1.3249.3	0	79.1005	471.387	79.0531
3	50.14	50.14	19.63	18.02	12.69	sp|Q01082|SPTB2_HUMAN	Spectrin beta chain, non-erythrocytic 1 OS=Homo sapiens GN=SPTBN1 PE=1 SV=2			0	98.69	DLDDFQSWLSR			0.00174384	1380.63	691.324	1380.63	691.323	2	7	1.1.1.3257.7	0	79.4375	593.608	79.3865
3	50.14	50.14	19.63	18.02	12.69	sp|Q01082|SPTB2_HUMAN	Spectrin beta chain, non-erythrocytic 1 OS=Homo sapiens GN=SPTBN1 PE=1 SV=2			0	98.69	DLDDFQSWLSR			-0.00130792	1380.63	691.322	1380.63	691.323	2	12	1.1.1.3797.2	0	96.0356	148.189	95.9981
3	50.14	50.14	19.63	18.02	12.69	sp|Q01082|SPTB2_HUMAN	Spectrin beta chain, non-erythrocytic 1 OS=Homo sapiens GN=SPTBN1 PE=1 SV=2			0	97.65	DLDDFQSWLSR			0.00309396	1380.63	691.324	1380.63	691.323	2	7	1.1.1.3200.2	1	77.0405	1268.75	77.0358
3	50.14	50.14	19.63	18.02	12.69	sp|Q01082|SPTB2_HUMAN	Spectrin beta chain, non-erythrocytic 1 OS=Homo sapiens GN=SPTBN1 PE=1 SV=2			0	97.57	DLDDFQSWLSR			-0.00265069	1380.63	691.322	1380.63	691.323	2	11	1.1.1.3397.3	0	85.2202	181.477	85.322
3	50.14	50.14	19.63	18.02	12.69	sp|Q01082|SPTB2_HUMAN	Spectrin beta chain, non-erythrocytic 1 OS=Homo sapiens GN=SPTBN1 PE=1 SV=2			0	97.21	DLDDFQSWLSR			-0.00228448	1380.63	691.322	1380.63	691.323	2	8	1.1.1.3334.11	0	82.7107	773.035	82.6554
3	50.14	50.14	19.63	18.02	12.69	sp|Q01082|SPTB2_HUMAN	Spectrin beta chain, non-erythrocytic 1 OS=Homo sapiens GN=SPTBN1 PE=1 SV=2			0	95.53	DLDDFQSWLSR			-0.00204034	1380.63	691.322	1380.63	691.323	2	8	1.1.1.3438.2	0	86.8704	568.22	86.9467
3	50.14	50.14	19.63	18.02	12.69	sp|Q01082|SPTB2_HUMAN	Spectrin beta chain, non-erythrocytic 1 OS=Homo sapiens GN=SPTBN1 PE=1 SV=2			0	93.36	DLDDFQSWLSR			-0.00204034	1380.63	691.322	1380.63	691.323	2	7	1.1.1.3302.7	0	81.3441	673.545	81.2949
3	50.14	50.14	19.63	18.02	12.69	sp|Q01082|SPTB2_HUMAN	Spectrin beta chain, non-erythrocytic 1 OS=Homo sapiens GN=SPTBN1 PE=1 SV=2			0	90.25	DLDDFQSWLSR			-0.00265069	1380.63	691.322	1380.63	691.323	2	11	1.1.1.3421.2	0	86.2192	521.804	86.2876
3	50.14	50.14	19.63	18.02	12.69	sp|Q01082|SPTB2_HUMAN	Spectrin beta chain, non-erythrocytic 1 OS=Homo sapiens GN=SPTBN1 PE=1 SV=2			0	89.62	DLDDFQSWLSR			-0.00240655	1380.63	691.322	1380.63	691.323	2	10	1.1.1.3405.3	0	85.5547	215.101	85.8309
3	50.14	50.14	19.63	18.02	12.69	sp|Q01082|SPTB2_HUMAN	Spectrin beta chain, non-erythrocytic 1 OS=Homo sapiens GN=SPTBN1 PE=1 SV=2			0	88.96	DLDDFQSWLSR			-0.00167413	1380.63	691.322	1380.63	691.323	2	7	1.1.1.3495.3	0	89.2866	431.623	89.3218
3	50.14	50.14	19.63	18.02	12.69	sp|Q01082|SPTB2_HUMAN	Spectrin beta chain, non-erythrocytic 1 OS=Homo sapiens GN=SPTBN1 PE=1 SV=2			0	86.75	DLDDFQSWLSR			-0.00265069	1380.63	691.322	1380.63	691.323	2	10	1.1.1.3373.3	0	84.2224	144.239	84.4765
3	50.14	50.14	19.63	18.02	12.69	sp|Q01082|SPTB2_HUMAN	Spectrin beta chain, non-erythrocytic 1 OS=Homo sapiens GN=SPTBN1 PE=1 SV=2			0	85.93	DLDDFQSWLSR			-0.00167413	1380.63	691.322	1380.63	691.323	2	7	1.1.1.3290.10	0	80.8451	719.292	80.5774
3	50.14	50.14	19.63	18.02	12.69	sp|Q01082|SPTB2_HUMAN	Spectrin beta chain, non-erythrocytic 1 OS=Homo sapiens GN=SPTBN1 PE=1 SV=2			0	85.08	DLDDFQSWLSR			0.00357489	1380.63	691.325	1380.63	691.323	2	9	1.1.1.3413.3	0	85.8873	450.57	86.1236
3	50.14	50.14	19.63	18.02	12.69	sp|Q01082|SPTB2_HUMAN	Spectrin beta chain, non-erythrocytic 1 OS=Homo sapiens GN=SPTBN1 PE=1 SV=2			0	77.91	DLDDFQSWLSR			-0.00142999	1380.63	691.322	1380.63	691.323	2	8	1.1.1.3637.2	0	93.07	98.272	92.9648
3	50.14	50.14	19.63	18.02	12.69	sp|Q01082|SPTB2_HUMAN	Spectrin beta chain, non-erythrocytic 1 OS=Homo sapiens GN=SPTBN1 PE=1 SV=2			0	56.48	DLDDFQSWLSR			-0.00240655	1380.63	691.322	1380.63	691.323	2	11	1.1.1.3430.2	0	86.5566	433.298	86.4967
3	50.14	50.14	19.63	18.02	12.69	sp|Q01082|SPTB2_HUMAN	Spectrin beta chain, non-erythrocytic 1 OS=Homo sapiens GN=SPTBN1 PE=1 SV=2			0	34.27	DLDDFQSWLSR			-0.00167413	1380.63	691.322	1380.63	691.323	2	6	1.1.1.3470.6	0	88.2235	494.097	88.2578
3	50.14	50.14	19.63	18.02	12.69	sp|Q01082|SPTB2_HUMAN	Spectrin beta chain, non-erythrocytic 1 OS=Homo sapiens GN=SPTBN1 PE=1 SV=2			0	22.95	DLDDFQSWLSR			-0.00167413	1380.63	691.322	1380.63	691.323	2	7	1.1.1.3350.3	0	83.3918	84.9746	83.4136
3	50.14	50.14	19.63	18.02	12.69	sp|Q01082|SPTB2_HUMAN	Spectrin beta chain, non-erythrocytic 1 OS=Homo sapiens GN=SPTBN1 PE=1 SV=2			0	22.95	DLDDFQSWLSR			0.00137763	1380.63	691.323	1380.63	691.323	2	7	1.1.1.3670.2	0	93.8391	86.3108	93.7372
3	50.14	50.14	19.63	18.02	12.69	sp|Q01082|SPTB2_HUMAN	Spectrin beta chain, non-erythrocytic 1 OS=Homo sapiens GN=SPTBN1 PE=1 SV=2			0	19.43	DLDDFQSWLSR			-0.00204034	1380.63	691.322	1380.63	691.323	2	7	1.1.1.3273.5	0	80.1156	660.017	80.1507
3	50.14	50.14	19.63	18.02	12.69	sp|Q01082|SPTB2_HUMAN	Spectrin beta chain, non-erythrocytic 1 OS=Homo sapiens GN=SPTBN1 PE=1 SV=2			0	16.3	DLDDFQSWLSR			-0.00167413	1380.63	691.322	1380.63	691.323	2	6	1.1.1.3282.5	0	80.4996	719.292	80.5774
3	50.14	50.14	19.63	18.02	12.69	sp|Q01082|SPTB2_HUMAN	Spectrin beta chain, non-erythrocytic 1 OS=Homo sapiens GN=SPTBN1 PE=1 SV=2			0	15.88	DLDDFQSWLSR			-0.00167413	1380.63	691.322	1380.63	691.323	2	6	1.1.1.3650.2	0	93.5014	82.4784	93.4054
3	50.14	50.14	19.63	18.02	12.69	sp|Q01082|SPTB2_HUMAN	Spectrin beta chain, non-erythrocytic 1 OS=Homo sapiens GN=SPTBN1 PE=1 SV=2			0	15.48	DLDDFQSWLSR			-0.00191827	1380.63	691.322	1380.63	691.323	2	6	1.1.1.3503.5	0	89.6305	419.264	89.7048
3	50.14	50.14	19.63	18.02	12.69	sp|Q01082|SPTB2_HUMAN	Spectrin beta chain, non-erythrocytic 1 OS=Homo sapiens GN=SPTBN1 PE=1 SV=2			0	90.58	DQNTVETLQR			-0.00109179	1202.59	602.301	1202.59	602.302	2	9	1.1.1.1932.13	1	23.7104	9113.85	23.9489
3	50.14	50.14	19.63	18.02	12.69	sp|Q01082|SPTB2_HUMAN	Spectrin beta chain, non-erythrocytic 1 OS=Homo sapiens GN=SPTBN1 PE=1 SV=2			0	99	DVEDEILWVGER			-0.000203876	1458.7	730.357	1458.7	730.357	2	14	1.1.1.3133.4	1	74.1954	40001.1	73.9774
3	50.14	50.14	19.63	18.02	12.69	sp|Q01082|SPTB2_HUMAN	Spectrin beta chain, non-erythrocytic 1 OS=Homo sapiens GN=SPTBN1 PE=1 SV=2			0	99	EIEELQSQAQALSQEGK			0.0055232	1886.93	944.471	1886.92	944.468	2	14	1.1.1.2432.35	1	44.679	2751.93	44.6891
3	50.14	50.14	19.63	18.02	12.69	sp|Q01082|SPTB2_HUMAN	Spectrin beta chain, non-erythrocytic 1 OS=Homo sapiens GN=SPTBN1 PE=1 SV=2			0	99	EIEELQSQAQALSQEGK			-0.000458262	1886.92	944.468	1886.92	944.468	2	23	1.1.1.2572.34	1	50.5619	90894.2	50.5307
3	50.14	50.14	19.63	18.02	12.69	sp|Q01082|SPTB2_HUMAN	Spectrin beta chain, non-erythrocytic 1 OS=Homo sapiens GN=SPTBN1 PE=1 SV=2			0	99	EIEELQSQAQALSQEGK			-0.00140711	1886.92	944.468	1886.92	944.468	2	20	1.1.1.2580.29	1	50.8955	90894.2	50.5307
3	50.14	50.14	19.63	18.02	12.69	sp|Q01082|SPTB2_HUMAN	Spectrin beta chain, non-erythrocytic 1 OS=Homo sapiens GN=SPTBN1 PE=1 SV=2			0	99	EIEELQSQAQALSQEGK			-0.00140711	1886.92	944.468	1886.92	944.468	2	14	1.1.1.2588.28	1	51.2335	21583	50.7838
3	50.14	50.14	19.63	18.02	12.69	sp|Q01082|SPTB2_HUMAN	Spectrin beta chain, non-erythrocytic 1 OS=Homo sapiens GN=SPTBN1 PE=1 SV=2			0	96.33	EIEELQSQAQALSQEGK	Deamidated(Q)@8		0.0140904	1887.92	944.967	1887.91	944.96	2	11	1.1.1.2584.29	1	51.065	26281.2	50.615
3	50.14	50.14	19.63	18.02	12.69	sp|Q01082|SPTB2_HUMAN	Spectrin beta chain, non-erythrocytic 1 OS=Homo sapiens GN=SPTBN1 PE=1 SV=2			0	94.47	EIEELQSQAQALSQEGK			-0.00860927	1886.91	944.464	1886.92	944.468	2	10	1.1.1.2596.30	1	51.5737	2544.13	51.3763
3	50.14	50.14	19.63	18.02	12.69	sp|Q01082|SPTB2_HUMAN	Spectrin beta chain, non-erythrocytic 1 OS=Homo sapiens GN=SPTBN1 PE=1 SV=2			0	86.62	EIEELQSQAQALSQEGK			-0.00946377	1886.91	944.464	1886.92	944.468	2	9	1.1.1.2604.25	1	51.9075	2281.29	51.7571
3	50.14	50.14	19.63	18.02	12.69	sp|Q01082|SPTB2_HUMAN	Spectrin beta chain, non-erythrocytic 1 OS=Homo sapiens GN=SPTBN1 PE=1 SV=2			0	89.47	EIGQSVDEVEK			0.000231194	1231.59	616.804	1231.59	616.804	2	10	1.1.1.2010.15	1	26.9701	74069.1	26.9141
3	50.14	50.14	19.63	18.02	12.69	sp|Q01082|SPTB2_HUMAN	Spectrin beta chain, non-erythrocytic 1 OS=Homo sapiens GN=SPTBN1 PE=1 SV=2			0	46.57	ELEAENYHDIK	Deamidated(N)@6		-0.00102083	1360.61	681.314	1360.61	681.315	2	8	1.1.1.2201.20	1	34.9604	1517.31	34.941
3	50.14	50.14	19.63	18.02	12.69	sp|Q01082|SPTB2_HUMAN	Spectrin beta chain, non-erythrocytic 1 OS=Homo sapiens GN=SPTBN1 PE=1 SV=2			0	17.44	ELEAENYHDIK			0.00357647	1359.63	680.824	1359.63	680.823	2	6	1.1.1.2039.21	0	28.1824	6870.31	27.7449
3	50.14	50.14	19.63	18.02	12.69	sp|Q01082|SPTB2_HUMAN	Spectrin beta chain, non-erythrocytic 1 OS=Homo sapiens GN=SPTBN1 PE=1 SV=2			0	94.04	ENEVLEAWK			0.000120413	1116.55	559.28	1116.55	559.28	2	9	1.1.1.2543.3	1	49.3178	9972.84	49.187
3	50.14	50.14	19.63	18.02	12.69	sp|Q01082|SPTB2_HUMAN	Spectrin beta chain, non-erythrocytic 1 OS=Homo sapiens GN=SPTBN1 PE=1 SV=2			0	59.28	ENEVLEAWK	Deamidated(N)@2		0.00744018	1117.54	559.776	1117.53	559.772	2	6	1.1.1.2571.2	1	50.493	487.912	50.4038
3	50.14	50.14	19.63	18.02	12.69	sp|Q01082|SPTB2_HUMAN	Spectrin beta chain, non-erythrocytic 1 OS=Homo sapiens GN=SPTBN1 PE=1 SV=2			0	40.18	ENEVLEAWK			0.000120413	1116.55	559.28	1116.55	559.28	2	8	1.1.1.2535.3	1	48.9823	9972.84	49.187
3	50.14	50.14	19.63	18.02	12.69	sp|Q01082|SPTB2_HUMAN	Spectrin beta chain, non-erythrocytic 1 OS=Homo sapiens GN=SPTBN1 PE=1 SV=2			0	99	EVDDLEQWIAER			-5.72813e-05	1501.7	751.86	1501.7	751.86	2	18	1.1.1.3124.7	1	73.8166	133352	73.7228
3	50.14	50.14	19.63	18.02	12.69	sp|Q01082|SPTB2_HUMAN	Spectrin beta chain, non-erythrocytic 1 OS=Homo sapiens GN=SPTBN1 PE=1 SV=2			0	99	EVDDLEQWIAER			-5.72813e-05	1501.7	751.86	1501.7	751.86	2	14	1.1.1.3116.8	1	73.4772	133352	73.7228
3	50.14	50.14	19.63	18.02	12.69	sp|Q01082|SPTB2_HUMAN	Spectrin beta chain, non-erythrocytic 1 OS=Homo sapiens GN=SPTBN1 PE=1 SV=2			0	99	EVDDLEQWIAER			-5.72813e-05	1501.7	751.86	1501.7	751.86	2	13	1.1.1.3132.6	1	74.1548	128030	73.7228
3	50.14	50.14	19.63	18.02	12.69	sp|Q01082|SPTB2_HUMAN	Spectrin beta chain, non-erythrocytic 1 OS=Homo sapiens GN=SPTBN1 PE=1 SV=2			0	99	EVDDLEQWIAER			0.00603537	1501.71	751.863	1501.7	751.86	2	9	1.1.1.3436.4	1	86.7926	239.946	86.8646
3	50.14	50.14	19.63	18.02	12.69	sp|Q01082|SPTB2_HUMAN	Spectrin beta chain, non-erythrocytic 1 OS=Homo sapiens GN=SPTBN1 PE=1 SV=2			0	99	EVDDLEQWIAER			0.0092092	1501.71	751.864	1501.7	751.86	2	8	1.1.1.3327.14	1	82.4147	360.13	82.4423
3	50.14	50.14	19.63	18.02	12.69	sp|Q01082|SPTB2_HUMAN	Spectrin beta chain, non-erythrocytic 1 OS=Homo sapiens GN=SPTBN1 PE=1 SV=2			0	93.78	EVDDLEQWIAER			0.00981955	1501.71	751.865	1501.7	751.86	2	7	1.1.1.3500.5	1	89.5028	204.368	89.4068
3	50.14	50.14	19.63	18.02	12.69	sp|Q01082|SPTB2_HUMAN	Spectrin beta chain, non-erythrocytic 1 OS=Homo sapiens GN=SPTBN1 PE=1 SV=2			0	64.28	EVDDLEQWIAER			0.0100637	1501.71	751.865	1501.7	751.86	2	6	1.1.1.3337.8	1	82.8357	370.832	82.9534
3	50.14	50.14	19.63	18.02	12.69	sp|Q01082|SPTB2_HUMAN	Spectrin beta chain, non-erythrocytic 1 OS=Homo sapiens GN=SPTBN1 PE=1 SV=2			0	34.27	EVDDLEQWIAER			0.00200706	1501.71	751.861	1501.7	751.86	2	5	1.1.1.3484.12	1	88.824	234.82	88.8108
3	50.14	50.14	19.63	18.02	12.69	sp|Q01082|SPTB2_HUMAN	Spectrin beta chain, non-erythrocytic 1 OS=Homo sapiens GN=SPTBN1 PE=1 SV=2			0	99	EVVAGSHELGQDYEHVTMLQER			0.00122341	2526.18	843.068	2526.18	843.068	3	11	1.1.1.2570.29	1	50.4734	5088.04	50.4038
3	50.14	50.14	19.63	18.02	12.69	sp|Q01082|SPTB2_HUMAN	Spectrin beta chain, non-erythrocytic 1 OS=Homo sapiens GN=SPTBN1 PE=1 SV=2			0	99	FESLEPEMNNQASR			0.0018053	1650.73	826.374	1650.73	826.373	2	14	1.1.1.2343.27	1	40.9344	11205.6	41.0346
3	50.14	50.14	19.63	18.02	12.69	sp|Q01082|SPTB2_HUMAN	Spectrin beta chain, non-erythrocytic 1 OS=Homo sapiens GN=SPTBN1 PE=1 SV=2			0	99	FESLEPEMNNQASR	Deamidated(N)@10		0.00370879	1651.72	826.866	1651.71	826.865	2	11	1.1.1.2399.24	1	43.2809	5341.7	43.0484
3	50.14	50.14	19.63	18.02	12.69	sp|Q01082|SPTB2_HUMAN	Spectrin beta chain, non-erythrocytic 1 OS=Homo sapiens GN=SPTBN1 PE=1 SV=2			0	99	IDDIFER			0.000640057	906.445	454.23	906.445	454.23	2	7	1.1.1.2453.2	0	45.5328	21288.7	45.1514
3	50.14	50.14	19.63	18.02	12.69	sp|Q01082|SPTB2_HUMAN	Spectrin beta chain, non-erythrocytic 1 OS=Homo sapiens GN=SPTBN1 PE=1 SV=2			0	99	IDDIFER			0.000640057	906.445	454.23	906.445	454.23	2	8	1.1.1.2445.2	0	45.1975	20860.1	45.1514
3	50.14	50.14	19.63	18.02	12.69	sp|Q01082|SPTB2_HUMAN	Spectrin beta chain, non-erythrocytic 1 OS=Homo sapiens GN=SPTBN1 PE=1 SV=2			0	99	LAEISDVWEEMK			-0.00138348	1448.68	725.349	1448.69	725.35	2	13	1.1.1.3093.7	1	72.4987	8737.63	72.4473
3	50.14	50.14	19.63	18.02	12.69	sp|Q01082|SPTB2_HUMAN	Spectrin beta chain, non-erythrocytic 1 OS=Homo sapiens GN=SPTBN1 PE=1 SV=2			0	98.24	LAEISDVWEEMK			-0.00138348	1448.68	725.349	1448.69	725.35	2	8	1.1.1.3101.6	1	72.8377	9084.77	72.4048
3	50.14	50.14	19.63	18.02	12.69	sp|Q01082|SPTB2_HUMAN	Spectrin beta chain, non-erythrocytic 1 OS=Homo sapiens GN=SPTBN1 PE=1 SV=2			0	27.98	LAEISDVWEEMK	Oxidation(M)@11		0.00120484	1464.68	733.348	1464.68	733.348	2	8	1.1.1.2709.7	1	56.3002	2536.61	56.4179
3	50.14	50.14	19.63	18.02	12.69	sp|Q01082|SPTB2_HUMAN	Spectrin beta chain, non-erythrocytic 1 OS=Homo sapiens GN=SPTBN1 PE=1 SV=2			0	53.44	LLDPEDISVDHPDEK			-0.000736179	1720.81	574.612	1720.82	574.612	3	7	1.1.1.2480.3	1	46.6677	26165	46.7885
3	50.14	50.14	19.63	18.02	12.69	sp|Q01082|SPTB2_HUMAN	Spectrin beta chain, non-erythrocytic 1 OS=Homo sapiens GN=SPTBN1 PE=1 SV=2			0	43.37	LLDPEDISVDHPDEK			-0.000736179	1720.81	574.612	1720.82	574.612	3	6	1.1.1.2488.4	1	47.0047	26165	46.7885
3	50.14	50.14	19.63	18.02	12.69	sp|Q01082|SPTB2_HUMAN	Spectrin beta chain, non-erythrocytic 1 OS=Homo sapiens GN=SPTBN1 PE=1 SV=2			0	98.11	LVSDGNINSDR	Deamidated(N)@8		-0.00242256	1189.56	595.785	1189.56	595.786	2	11	1.1.1.1909.13	1	22.7512	4608.89	22.7378
3	50.14	50.14	19.63	18.02	12.69	sp|Q01082|SPTB2_HUMAN	Spectrin beta chain, non-erythrocytic 1 OS=Homo sapiens GN=SPTBN1 PE=1 SV=2			0	95.27	LVSDGNINSDR			-0.00144199	1188.57	595.293	1188.57	595.294	2	10	1.1.1.1876.11	1	21.3679	11140.3	21.272
3	50.14	50.14	19.63	18.02	12.69	sp|Q01082|SPTB2_HUMAN	Spectrin beta chain, non-erythrocytic 1 OS=Homo sapiens GN=SPTBN1 PE=1 SV=2			0	99	MAETVDTSEMVNGATEQR	Deamidated(N)@12		-0.000959946	1968.84	985.427	1968.84	985.427	2	12	1.1.1.2309.39	1	39.5111	2429.62	39.7287
3	50.14	50.14	19.63	18.02	12.69	sp|Q01082|SPTB2_HUMAN	Spectrin beta chain, non-erythrocytic 1 OS=Homo sapiens GN=SPTBN1 PE=1 SV=2			0	99	MAETVDTSEMVNGATEQR	Deamidated(N)@12		0.0073144	1968.85	985.431	1968.84	985.427	2	12	1.1.1.2427.38	1	44.4707	1066.46	44.4363
3	50.14	50.14	19.63	18.02	12.69	sp|Q01082|SPTB2_HUMAN	Spectrin beta chain, non-erythrocytic 1 OS=Homo sapiens GN=SPTBN1 PE=1 SV=2			0	96.07	MAETVDTSEMVNGATEQR	Deamidated(N)@12		0.00294631	1968.84	985.429	1968.84	985.427	2	9	1.1.1.2329.40	1	40.3561	1832.89	39.8974
3	50.14	50.14	19.63	18.02	12.69	sp|Q01082|SPTB2_HUMAN	Spectrin beta chain, non-erythrocytic 1 OS=Homo sapiens GN=SPTBN1 PE=1 SV=2			0	62.66	MAETVDTSEMVNGATEQR	Deamidated(N)@12		0.0115869	1968.85	985.433	1968.84	985.427	2	8	1.1.1.2467.37	1	46.1499	807.45	46.2427
3	50.14	50.14	19.63	18.02	12.69	sp|Q01082|SPTB2_HUMAN	Spectrin beta chain, non-erythrocytic 1 OS=Homo sapiens GN=SPTBN1 PE=1 SV=2			0	99	MLTAQDMSYDEAR			-0.00184917	1529.65	765.831	1529.65	765.832	2	14	1.1.1.2401.28	1	43.3679	13273.7	43.0484
3	50.14	50.14	19.63	18.02	12.69	sp|Q01082|SPTB2_HUMAN	Spectrin beta chain, non-erythrocytic 1 OS=Homo sapiens GN=SPTBN1 PE=1 SV=2			0	49.72	NEIDNYEEDYQK			-0.00155398	1558.64	780.328	1558.64	780.328	2	9	1.1.1.2310.21	1	39.5383	4782.81	39.5179
3	50.14	50.14	19.63	18.02	12.69	sp|Q01082|SPTB2_HUMAN	Spectrin beta chain, non-erythrocytic 1 OS=Homo sapiens GN=SPTBN1 PE=1 SV=2			0	92.02	SLLDACESR	Carbamidomethyl(C)@6		-0.00207735	1049.48	525.747	1049.48	525.748	2	9	1.1.1.2116.5	0	31.3869	4969.3	31.59
3	50.14	50.14	19.63	18.02	12.69	sp|Q01082|SPTB2_HUMAN	Spectrin beta chain, non-erythrocytic 1 OS=Homo sapiens GN=SPTBN1 PE=1 SV=2			0	99	TQTAIASEDMPNTLTEAEK			0.000252681	2048.96	1025.49	2048.96	1025.49	2	16	1.1.1.2523.37	1	48.5047	40071.4	48.2604
3	50.14	50.14	19.63	18.02	12.69	sp|Q01082|SPTB2_HUMAN	Spectrin beta chain, non-erythrocytic 1 OS=Homo sapiens GN=SPTBN1 PE=1 SV=2			0	99	TQTAIASEDMPNTLTEAEK	Oxidation(M)@10		0.00360174	2064.96	1033.48	2064.95	1033.48	2	12	1.1.1.2249.38	1	36.9949	1542.68	37.0865
3	50.14	50.14	19.63	18.02	12.69	sp|Q01082|SPTB2_HUMAN	Spectrin beta chain, non-erythrocytic 1 OS=Homo sapiens GN=SPTBN1 PE=1 SV=2			0	68.28	TQTAIASEDMPNTLTEAEK	Deamidated(N)@12		0.00720619	2049.95	1025.98	2049.94	1025.98	2	10	1.1.1.2451.36	1	45.4773	1052.05	45.4029
3	50.14	50.14	19.63	18.02	12.69	sp|Q01082|SPTB2_HUMAN	Spectrin beta chain, non-erythrocytic 1 OS=Homo sapiens GN=SPTBN1 PE=1 SV=2			0	50.32	TQTAIASEDMPNTLTEAEK			0.000252681	2048.96	1025.49	2048.96	1025.49	2	9	1.1.1.2526.38	1	48.6321	40071.4	48.2604
3	50.14	50.14	19.63	18.02	12.69	sp|Q01082|SPTB2_HUMAN	Spectrin beta chain, non-erythrocytic 1 OS=Homo sapiens GN=SPTBN1 PE=1 SV=2			0	18.2	TSSKESSPIPSPTSDRK	Phospho(S)@3; Phospho(S)@7; Phospho(S)@11	missed K-E@4; missed R-K@16	0.00641538	2042.81	1022.41	2042.8	1022.41	2	6	1.1.1.1869.37	1	21.0954	530.336	21.0619
3	50.14	50.14	19.63	18.02	12.69	sp|Q01082|SPTB2_HUMAN	Spectrin beta chain, non-erythrocytic 1 OS=Homo sapiens GN=SPTBN1 PE=1 SV=2			0	98.14	VLDNAIETEK			4.97784e-05	1130.58	566.298	1130.58	566.298	2	9	1.1.1.2019.10	1	27.3383	5702.18	27.2037
4	47.22	47.22	30.39	27.9	26.24	sp|P08238|HS90B_HUMAN	Heat shock protein HSP 90-beta OS=Homo sapiens GN=HSP90AB1 PE=1 SV=4			2	99	ADLINNLGTIAK			-0.00361913	1241.69	621.854	1241.7	621.856	2	9	1.1.1.2721.3	0	56.804	439.123	56.7985
4	47.22	47.22	30.39	27.9	26.24	sp|P08238|HS90B_HUMAN	Heat shock protein HSP 90-beta OS=Homo sapiens GN=HSP90AB1 PE=1 SV=4			2	99	APFDLFENK			0.00197607	1079.53	540.773	1079.53	540.772	2	8	1.1.1.2828.3	1	61.3003	883.298	61.2526
4	47.22	47.22	30.39	27.9	26.24	sp|P08238|HS90B_HUMAN	Heat shock protein HSP 90-beta OS=Homo sapiens GN=HSP90AB1 PE=1 SV=4			2	99	EDQTEYLEER			0.000131421	1310.56	656.289	1310.56	656.289	2	15	1.1.1.2144.17	0	32.5683	499190	32.1351
4	47.22	47.22	30.39	27.9	26.24	sp|P08238|HS90B_HUMAN	Heat shock protein HSP 90-beta OS=Homo sapiens GN=HSP90AB1 PE=1 SV=4			2	99	EGLELPEDEEEK			0.00221492	1415.63	708.823	1415.63	708.822	2	18	1.1.1.2361.17	0	41.6772	384629	41.8276
4	47.22	47.22	30.39	27.9	26.24	sp|P08238|HS90B_HUMAN	Heat shock protein HSP 90-beta OS=Homo sapiens GN=HSP90AB1 PE=1 SV=4			2	99	EGLELPEDEEEKK		missed K-K@12	0.0015867	1543.73	772.871	1543.73	772.87	2	17	1.1.1.2188.18	0	34.4126	124164	34.6886
4	47.22	47.22	30.39	27.9	26.24	sp|P08238|HS90B_HUMAN	Heat shock protein HSP 90-beta OS=Homo sapiens GN=HSP90AB1 PE=1 SV=4			2	99	EGLELPEDEEEKKK		missed K-K@12; missed K-K@13	0.00189123	1671.82	558.281	1671.82	558.281	3	12	1.1.1.2027.11	0	27.6727	208608	27.8285
4	47.22	47.22	30.39	27.9	26.24	sp|P08238|HS90B_HUMAN	Heat shock protein HSP 90-beta OS=Homo sapiens GN=HSP90AB1 PE=1 SV=4			2	99	EISDDEAEEEKGEK	Phospho(S)@3	missed K-G@11	0.00309243	1686.65	844.334	1686.65	844.333	2	14	1.1.1.1821.35	1	19.0787	9313.77	18.9202
4	47.22	47.22	30.39	27.9	26.24	sp|P08238|HS90B_HUMAN	Heat shock protein HSP 90-beta OS=Homo sapiens GN=HSP90AB1 PE=1 SV=4			2	99	EKEISDDEAEEEK	Phospho(S)@5	missed K-E@2	0.000466024	1629.63	815.822	1629.63	815.822	2	17	1.1.1.1816.36	1	18.8687	7204.29	18.8358
4	47.22	47.22	30.39	27.9	26.24	sp|P08238|HS90B_HUMAN	Heat shock protein HSP 90-beta OS=Homo sapiens GN=HSP90AB1 PE=1 SV=4			2	99	EKEISDDEAEEEKGEK	Phospho(S)@5	missed K-E@2; missed K-G@13	6.96597e-05	1943.79	972.902	1943.79	972.902	2	14	1.1.1.1798.37	1	18.1154	3740.21	18.2903
4	47.22	47.22	30.39	27.9	26.24	sp|P08238|HS90B_HUMAN	Heat shock protein HSP 90-beta OS=Homo sapiens GN=HSP90AB1 PE=1 SV=4			2	99	EKYIDQEELNK		missed K-Y@2	-0.00115269	1407.69	704.851	1407.69	704.851	2	16	1.1.1.2000.20	0	26.5618	9692.11	26.4986
4	47.22	47.22	30.39	27.9	26.24	sp|P08238|HS90B_HUMAN	Heat shock protein HSP 90-beta OS=Homo sapiens GN=HSP90AB1 PE=1 SV=4			2	99	ELISNASDALDK			-0.00196608	1274.63	638.324	1274.64	638.325	2	11	1.1.1.2201.16	0	34.957	3389.34	34.7307
4	47.22	47.22	30.39	27.9	26.24	sp|P08238|HS90B_HUMAN	Heat shock protein HSP 90-beta OS=Homo sapiens GN=HSP90AB1 PE=1 SV=4			2	99	EQVANSAFVER			-0.00102131	1248.61	625.312	1248.61	625.312	2	13	1.1.1.2078.19	1	29.8011	27981.2	29.8668
4	47.22	47.22	30.39	27.9	26.24	sp|P08238|HS90B_HUMAN	Heat shock protein HSP 90-beta OS=Homo sapiens GN=HSP90AB1 PE=1 SV=4			2	99	GVVDSEDLPLNISR			-0.00161561	1512.78	757.396	1512.78	757.396	2	16	1.1.1.2628.13	0	52.9076	5467.32	53.062
4	47.22	47.22	30.39	27.9	26.24	sp|P08238|HS90B_HUMAN	Heat shock protein HSP 90-beta OS=Homo sapiens GN=HSP90AB1 PE=1 SV=4			2	99	IDIIPNPQER			0.000585431	1193.64	597.828	1193.64	597.828	2	11	1.1.1.2451.4	1	45.4506	19989.7	45.8641
4	47.22	47.22	30.39	27.9	26.24	sp|P08238|HS90B_HUMAN	Heat shock protein HSP 90-beta OS=Homo sapiens GN=HSP90AB1 PE=1 SV=4			2	99	IEDVGSDEEDDSGK	Phospho(S)@6		-0.000327448	1573.57	787.79	1573.57	787.791	2	16	1.1.1.1919.25	1	23.1822	13406.9	23.3629
4	47.22	47.22	30.39	27.9	26.24	sp|P08238|HS90B_HUMAN	Heat shock protein HSP 90-beta OS=Homo sapiens GN=HSP90AB1 PE=1 SV=4			2	99	IEDVGSDEEDDSGKDK	Phospho(S)@6	missed K-D@14	0.000660314	1816.69	909.352	1816.69	909.352	2	18	1.1.1.1854.38	1	20.4645	119727	20.0128
4	47.22	47.22	30.39	27.9	26.24	sp|P08238|HS90B_HUMAN	Heat shock protein HSP 90-beta OS=Homo sapiens GN=HSP90AB1 PE=1 SV=4			2	99	IEDVGSDEEDDSGKDKK	Phospho(S)@6	missed K-D@14; missed K-K@16	-0.000791665	1944.78	973.399	1944.78	973.399	2	12	1.1.1.1739.26	1	15.6641	2092	15.7543
4	47.22	47.22	30.39	27.9	26.24	sp|P08238|HS90B_HUMAN	Heat shock protein HSP 90-beta OS=Homo sapiens GN=HSP90AB1 PE=1 SV=4			2	99	NPDDITQEEYGEFYK			-0.00503911	1846.78	924.4	1846.79	924.402	2	19	1.1.1.2713.25	1	56.4839	29836.6	56.3337
4	47.22	47.22	30.39	27.9	26.24	sp|P08238|HS90B_HUMAN	Heat shock protein HSP 90-beta OS=Homo sapiens GN=HSP90AB1 PE=1 SV=4			2	99	VILHLKEDQTEYLEER		missed K-E@6	0.00385529	2014.04	672.354	2014.04	672.353	3	9	1.1.1.2446.11	0	45.247	1413.64	45.2351
4	47.22	47.22	30.39	27.9	26.24	sp|P08238|HS90B_HUMAN	Heat shock protein HSP 90-beta OS=Homo sapiens GN=HSP90AB1 PE=1 SV=4			2	99	YESLTDPSK			-0.00032037	1038.49	520.251	1038.49	520.251	2	9	1.1.1.1931.7	0	23.6634	8605.24	23.3629
4	47.22	47.22	30.39	27.9	26.24	sp|P08238|HS90B_HUMAN	Heat shock protein HSP 90-beta OS=Homo sapiens GN=HSP90AB1 PE=1 SV=4			2	99	YESLTDPSKLDSGK		missed K-L@9	-0.00106372	1538.75	770.38	1538.75	770.38	2	16	1.1.1.2200.18	0	34.9167	14018.6	34.7728
4	47.22	47.22	30.39	27.9	26.24	sp|P08238|HS90B_HUMAN	Heat shock protein HSP 90-beta OS=Homo sapiens GN=HSP90AB1 PE=1 SV=4			2	99	YHTSQSGDEMTSLSEYVSR			9.09052e-05	2175.94	726.32	2175.94	726.32	3	17	1.1.1.2597.14	1	51.6026	7039.2	51.7571
4	47.22	47.22	30.39	27.9	26.24	sp|P08238|HS90B_HUMAN	Heat shock protein HSP 90-beta OS=Homo sapiens GN=HSP90AB1 PE=1 SV=4			2	99	YIDQEELNK			0.000979113	1150.55	576.283	1150.55	576.283	2	13	1.1.1.1991.10	0	26.1752	156943	26.1644
4	47.22	47.22	30.39	27.9	26.24	sp|P08238|HS90B_HUMAN	Heat shock protein HSP 90-beta OS=Homo sapiens GN=HSP90AB1 PE=1 SV=4			0.943095	88.78	CLELFSELAEDK	Carbamidomethyl(C)@1		-0.00179321	1452.68	727.347	1452.68	727.348	2	7	1.1.1.3124.4	0	73.8141	1834.71	73.7228
4	47.22	47.22	30.39	27.9	26.24	sp|P08238|HS90B_HUMAN	Heat shock protein HSP 90-beta OS=Homo sapiens GN=HSP90AB1 PE=1 SV=4			0.194499	36.6	SIYYITGESK			-0.00192778	1159.57	580.794	1159.58	580.795	2	8	1.1.1.2306.9	1	39.3596	2469.58	39.4336
4	47.22	47.22	30.39	27.9	26.24	sp|P08238|HS90B_HUMAN	Heat shock protein HSP 90-beta OS=Homo sapiens GN=HSP90AB1 PE=1 SV=4			0.0851282	18.08	EDQTEYLEERR		missed R-R@10	-0.00157004	1466.66	734.338	1466.66	734.339	2	6	1.1.1.2013.20	0	27.1026	3162.12	26.6649
4	47.22	47.22	30.39	27.9	26.24	sp|P08238|HS90B_HUMAN	Heat shock protein HSP 90-beta OS=Homo sapiens GN=HSP90AB1 PE=1 SV=4			0	99	EDQTEYLEER			0.000131421	1310.56	656.289	1310.56	656.289	2	15	1.1.1.2128.18	0	31.902	514569	32.0935
4	47.22	47.22	30.39	27.9	26.24	sp|P08238|HS90B_HUMAN	Heat shock protein HSP 90-beta OS=Homo sapiens GN=HSP90AB1 PE=1 SV=4			0	99	EDQTEYLEER			0.000131421	1310.56	656.289	1310.56	656.289	2	14	1.1.1.2136.11	0	32.23	514569	32.0935
4	47.22	47.22	30.39	27.9	26.24	sp|P08238|HS90B_HUMAN	Heat shock protein HSP 90-beta OS=Homo sapiens GN=HSP90AB1 PE=1 SV=4			0	99	EDQTEYLEER			0.00034418	1310.56	656.289	1310.56	656.289	2	12	1.1.1.2160.14	0	33.2389	42646.6	32.8032
4	47.22	47.22	30.39	27.9	26.24	sp|P08238|HS90B_HUMAN	Heat shock protein HSP 90-beta OS=Homo sapiens GN=HSP90AB1 PE=1 SV=4			0	99	EDQTEYLEER			-0.00209723	1310.56	656.288	1310.56	656.289	2	10	1.1.1.2192.16	0	34.5787	3342.34	34.4368
4	47.22	47.22	30.39	27.9	26.24	sp|P08238|HS90B_HUMAN	Heat shock protein HSP 90-beta OS=Homo sapiens GN=HSP90AB1 PE=1 SV=4			0	99	EDQTEYLEER			0.000100039	1310.56	656.289	1310.56	656.289	2	10	1.1.1.2184.11	0	34.2397	7003.7	33.8109
4	47.22	47.22	30.39	27.9	26.24	sp|P08238|HS90B_HUMAN	Heat shock protein HSP 90-beta OS=Homo sapiens GN=HSP90AB1 PE=1 SV=4			0	99	EDQTEYLEER			-0.00173102	1310.56	656.288	1310.56	656.289	2	8	1.1.1.2222.13	0	35.8405	2377.57	35.7004
4	47.22	47.22	30.39	27.9	26.24	sp|P08238|HS90B_HUMAN	Heat shock protein HSP 90-beta OS=Homo sapiens GN=HSP90AB1 PE=1 SV=4			0	98.95	EDQTEYLEER			0.00984944	1310.57	656.293	1310.56	656.289	2	8	1.1.1.2669.8	0	54.6211	689.184	54.5283
4	47.22	47.22	30.39	27.9	26.24	sp|P08238|HS90B_HUMAN	Heat shock protein HSP 90-beta OS=Homo sapiens GN=HSP90AB1 PE=1 SV=4			0	98.76	EDQTEYLEER			0.00034418	1310.56	656.289	1310.56	656.289	2	10	1.1.1.2176.12	0	33.9066	7331.05	33.7692
4	47.22	47.22	30.39	27.9	26.24	sp|P08238|HS90B_HUMAN	Heat shock protein HSP 90-beta OS=Homo sapiens GN=HSP90AB1 PE=1 SV=4			0	98.36	EDQTEYLEER			-0.00148688	1310.56	656.288	1310.56	656.289	2	8	1.1.1.2238.12	0	36.5098	2281.46	36.4136
4	47.22	47.22	30.39	27.9	26.24	sp|P08238|HS90B_HUMAN	Heat shock protein HSP 90-beta OS=Homo sapiens GN=HSP90AB1 PE=1 SV=4			0	98.01	EDQTEYLEER			-0.00011272	1310.56	656.288	1310.56	656.289	2	11	1.1.1.2123.15	0	31.6892	493467	32.0935
4	47.22	47.22	30.39	27.9	26.24	sp|P08238|HS90B_HUMAN	Heat shock protein HSP 90-beta OS=Homo sapiens GN=HSP90AB1 PE=1 SV=4			0	97.9	EDQTEYLEER			0.00144282	1310.56	656.289	1310.56	656.289	2	8	1.1.1.2230.8	0	36.1723	1884.11	36.1213
4	47.22	47.22	30.39	27.9	26.24	sp|P08238|HS90B_HUMAN	Heat shock protein HSP 90-beta OS=Homo sapiens GN=HSP90AB1 PE=1 SV=4			0	97.88	EDQTEYLEER			0.000375562	1310.56	656.289	1310.56	656.289	2	11	1.1.1.2152.18	0	32.9053	197218	32.4683
4	47.22	47.22	30.39	27.9	26.24	sp|P08238|HS90B_HUMAN	Heat shock protein HSP 90-beta OS=Homo sapiens GN=HSP90AB1 PE=1 SV=4			0	97.39	EDQTEYLEER			0.010568	1310.57	656.294	1310.56	656.289	2	6	1.1.1.3083.2	0	72.0701	545.059	72.1502
4	47.22	47.22	30.39	27.9	26.24	sp|P08238|HS90B_HUMAN	Heat shock protein HSP 90-beta OS=Homo sapiens GN=HSP90AB1 PE=1 SV=4			0	86.01	EDQTEYLEER			0.0109342	1310.57	656.294	1310.56	656.289	2	5	1.1.1.3202.2	0	77.1255	243.058	77.0781
4	47.22	47.22	30.39	27.9	26.24	sp|P08238|HS90B_HUMAN	Heat shock protein HSP 90-beta OS=Homo sapiens GN=HSP90AB1 PE=1 SV=4			0	84.12	EDQTEYLEER			0.0124129	1310.58	656.295	1310.56	656.289	2	6	1.1.1.2633.5	0	53.1109	789.03	52.978
4	47.22	47.22	30.39	27.9	26.24	sp|P08238|HS90B_HUMAN	Heat shock protein HSP 90-beta OS=Homo sapiens GN=HSP90AB1 PE=1 SV=4			0	70.84	EDQTEYLEER			0.00294315	1310.57	656.29	1310.56	656.289	2	6	1.1.1.3398.3	0	85.2577	94.2609	85.237
4	47.22	47.22	30.39	27.9	26.24	sp|P08238|HS90B_HUMAN	Heat shock protein HSP 90-beta OS=Homo sapiens GN=HSP90AB1 PE=1 SV=4			0	65.95	EDQTEYLEER			0.00547115	1310.57	656.291	1310.56	656.289	2	7	1.1.1.2282.9	0	38.353	3037.09	37.9258
4	47.22	47.22	30.39	27.9	26.24	sp|P08238|HS90B_HUMAN	Heat shock protein HSP 90-beta OS=Homo sapiens GN=HSP90AB1 PE=1 SV=4			0	63.32	EDQTEYLEER			0.000100039	1310.56	656.289	1310.56	656.289	2	9	1.1.1.2168.12	0	33.5733	17350.7	33.1402
4	47.22	47.22	30.39	27.9	26.24	sp|P08238|HS90B_HUMAN	Heat shock protein HSP 90-beta OS=Homo sapiens GN=HSP90AB1 PE=1 SV=4			0	60.89	EDQTEYLEER			0.0103238	1310.57	656.294	1310.56	656.289	2	4	1.1.1.3074.3	0	71.6896	581.143	71.5155
4	47.22	47.22	30.39	27.9	26.24	sp|P08238|HS90B_HUMAN	Heat shock protein HSP 90-beta OS=Homo sapiens GN=HSP90AB1 PE=1 SV=4			0	52.96	EDQTEYLEER			-0.00185309	1310.56	656.288	1310.56	656.289	2	7	1.1.1.2200.12	0	34.9117	3221.32	34.6886
4	47.22	47.22	30.39	27.9	26.24	sp|P08238|HS90B_HUMAN	Heat shock protein HSP 90-beta OS=Homo sapiens GN=HSP90AB1 PE=1 SV=4			0	45.95	EDQTEYLEER			0.00888912	1310.57	656.293	1310.56	656.289	2	7	1.1.1.2273.17	0	37.9844	12082	37.5497
4	47.22	47.22	30.39	27.9	26.24	sp|P08238|HS90B_HUMAN	Heat shock protein HSP 90-beta OS=Homo sapiens GN=HSP90AB1 PE=1 SV=4			0	36.26	EDQTEYLEER			0.00618732	1310.57	656.292	1310.56	656.289	2	6	1.1.1.2740.5	0	57.608	558.808	57.6431
4	47.22	47.22	30.39	27.9	26.24	sp|P08238|HS90B_HUMAN	Heat shock protein HSP 90-beta OS=Homo sapiens GN=HSP90AB1 PE=1 SV=4			0	34.51	EDQTEYLEER	Deamidated(Q)@3		0.00372481	1311.55	656.783	1311.55	656.781	2	6	1.1.1.3056.3	0	70.9346	2426.52	70.7624
4	47.22	47.22	30.39	27.9	26.24	sp|P08238|HS90B_HUMAN	Heat shock protein HSP 90-beta OS=Homo sapiens GN=HSP90AB1 PE=1 SV=4			0	20.06	EDQTEYLEER			0.00538455	1310.57	656.291	1310.56	656.289	2	5	1.1.1.3446.3	0	87.2013	251.939	87.2381
4	47.22	47.22	30.39	27.9	26.24	sp|P08238|HS90B_HUMAN	Heat shock protein HSP 90-beta OS=Homo sapiens GN=HSP90AB1 PE=1 SV=4			0	15.73	EDQTEYLEER			0.00643146	1310.57	656.292	1310.56	656.289	2	5	1.1.1.2711.2	0	56.3802	896.825	56.3337
4	47.22	47.22	30.39	27.9	26.24	sp|P08238|HS90B_HUMAN	Heat shock protein HSP 90-beta OS=Homo sapiens GN=HSP90AB1 PE=1 SV=4			0	15.41	EDQTEYLEERR		missed R-R@10	-0.00218039	1466.66	734.338	1466.66	734.339	2	8	1.1.1.2005.19	0	26.7745	12615.2	26.4149
4	47.22	47.22	30.39	27.9	26.24	sp|P08238|HS90B_HUMAN	Heat shock protein HSP 90-beta OS=Homo sapiens GN=HSP90AB1 PE=1 SV=4			0	99	EGLELPEDEEEK			0.00245906	1415.63	708.824	1415.63	708.822	2	15	1.1.1.2353.13	0	41.3397	319988	41.7441
4	47.22	47.22	30.39	27.9	26.24	sp|P08238|HS90B_HUMAN	Heat shock protein HSP 90-beta OS=Homo sapiens GN=HSP90AB1 PE=1 SV=4			0	99	EGLELPEDEEEK			0.00175787	1415.63	708.823	1415.63	708.822	2	16	1.1.1.2369.21	0	42.0148	384629	41.8276
4	47.22	47.22	30.39	27.9	26.24	sp|P08238|HS90B_HUMAN	Heat shock protein HSP 90-beta OS=Homo sapiens GN=HSP90AB1 PE=1 SV=4			0	99	EGLELPEDEEEK			0.00175787	1415.63	708.823	1415.63	708.822	2	15	1.1.1.2377.16	0	42.3471	346084	41.9113
4	47.22	47.22	30.39	27.9	26.24	sp|P08238|HS90B_HUMAN	Heat shock protein HSP 90-beta OS=Homo sapiens GN=HSP90AB1 PE=1 SV=4			0	99	EGLELPEDEEEK			0.000170948	1415.63	708.823	1415.63	708.822	2	14	1.1.1.2385.18	0	42.6865	102759	42.2464
4	47.22	47.22	30.39	27.9	26.24	sp|P08238|HS90B_HUMAN	Heat shock protein HSP 90-beta OS=Homo sapiens GN=HSP90AB1 PE=1 SV=4			0	99	EGLELPEDEEEK			0.000170948	1415.63	708.823	1415.63	708.822	2	12	1.1.1.2393.16	0	43.0224	24715	42.5841
4	47.22	47.22	30.39	27.9	26.24	sp|P08238|HS90B_HUMAN	Heat shock protein HSP 90-beta OS=Homo sapiens GN=HSP90AB1 PE=1 SV=4			0	99	EGLELPEDEEEK			-0.00429188	1415.63	708.82	1415.63	708.822	2	8	1.1.1.3323.6	0	82.2375	512.419	82.2718
4	47.22	47.22	30.39	27.9	26.24	sp|P08238|HS90B_HUMAN	Heat shock protein HSP 90-beta OS=Homo sapiens GN=HSP90AB1 PE=1 SV=4			0	99	EGLELPEDEEEK			-0.00185048	1415.63	708.822	1415.63	708.822	2	8	1.1.1.3315.5	0	81.8952	541.033	81.9303
4	47.22	47.22	30.39	27.9	26.24	sp|P08238|HS90B_HUMAN	Heat shock protein HSP 90-beta OS=Homo sapiens GN=HSP90AB1 PE=1 SV=4			0	99	EGLELPEDEEEK			-0.00111806	1415.63	708.822	1415.63	708.822	2	9	1.1.1.3404.3	0	85.5055	84.3271	85.4916
4	47.22	47.22	30.39	27.9	26.24	sp|P08238|HS90B_HUMAN	Heat shock protein HSP 90-beta OS=Homo sapiens GN=HSP90AB1 PE=1 SV=4			0	99	EGLELPEDEEEK			-0.0013622	1415.63	708.822	1415.63	708.822	2	8	1.1.1.3339.13	0	82.925	595.577	82.9534
4	47.22	47.22	30.39	27.9	26.24	sp|P08238|HS90B_HUMAN	Heat shock protein HSP 90-beta OS=Homo sapiens GN=HSP90AB1 PE=1 SV=4			0	99	EGLELPEDEEEK			0.00168955	1415.63	708.823	1415.63	708.822	2	7	1.1.1.3450.11	0	87.3776	266.62	87.4077
4	47.22	47.22	30.39	27.9	26.24	sp|P08238|HS90B_HUMAN	Heat shock protein HSP 90-beta OS=Homo sapiens GN=HSP90AB1 PE=1 SV=4			0	99	EGLELPEDEEEK			0.00132334	1415.63	708.823	1415.63	708.822	2	7	1.1.1.3331.10	0	82.5818	530.414	82.5701
4	47.22	47.22	30.39	27.9	26.24	sp|P08238|HS90B_HUMAN	Heat shock protein HSP 90-beta OS=Homo sapiens GN=HSP90AB1 PE=1 SV=4			0	99	EGLELPEDEEEK			-0.00368153	1415.63	708.821	1415.63	708.822	2	7	1.1.1.3292.9	0	80.9294	473.621	80.9185
4	47.22	47.22	30.39	27.9	26.24	sp|P08238|HS90B_HUMAN	Heat shock protein HSP 90-beta OS=Homo sapiens GN=HSP90AB1 PE=1 SV=4			0	99	EGLELPEDEEEK			-0.00429188	1415.63	708.82	1415.63	708.822	2	7	1.1.1.3378.2	0	84.3999	51.692	84.3937
4	47.22	47.22	30.39	27.9	26.24	sp|P08238|HS90B_HUMAN	Heat shock protein HSP 90-beta OS=Homo sapiens GN=HSP90AB1 PE=1 SV=4			0	93.78	EGLELPEDEEEK			0.00669443	1415.64	708.826	1415.63	708.822	2	7	1.1.1.3284.5	0	80.5851	558.584	80.4494
4	47.22	47.22	30.39	27.9	26.24	sp|P08238|HS90B_HUMAN	Heat shock protein HSP 90-beta OS=Homo sapiens GN=HSP90AB1 PE=1 SV=4			0	90.25	EGLELPEDEEEK			0.00352061	1415.63	708.824	1415.63	708.822	2	6	1.1.1.3260.2	0	79.5608	403.976	79.5135
4	47.22	47.22	30.39	27.9	26.24	sp|P08238|HS90B_HUMAN	Heat shock protein HSP 90-beta OS=Homo sapiens GN=HSP90AB1 PE=1 SV=4			0	86.75	EGLELPEDEEEK			0.00266611	1415.63	708.824	1415.63	708.822	2	6	1.1.1.3508.5	0	89.8415	195.269	89.7048
4	47.22	47.22	30.39	27.9	26.24	sp|P08238|HS90B_HUMAN	Heat shock protein HSP 90-beta OS=Homo sapiens GN=HSP90AB1 PE=1 SV=4			0	55.58	EGLELPEDEEEK			-0.00349117	1415.63	708.821	1415.63	708.822	2	7	1.1.1.2459.16	0	45.7961	1574.57	45.7801
4	47.22	47.22	30.39	27.9	26.24	sp|P08238|HS90B_HUMAN	Heat shock protein HSP 90-beta OS=Homo sapiens GN=HSP90AB1 PE=1 SV=4			0	38.85	EGLELPEDEEEK			-0.00300289	1415.63	708.821	1415.63	708.822	2	6	1.1.1.2467.16	0	46.1324	1637.36	45.9482
4	47.22	47.22	30.39	27.9	26.24	sp|P08238|HS90B_HUMAN	Heat shock protein HSP 90-beta OS=Homo sapiens GN=HSP90AB1 PE=1 SV=4			0	15.88	EGLELPEDEEEK			0.00651862	1415.64	708.826	1415.63	708.822	2	5	1.1.1.2479.10	0	46.6316	1037.54	46.7465
4	47.22	47.22	30.39	27.9	26.24	sp|P08238|HS90B_HUMAN	Heat shock protein HSP 90-beta OS=Homo sapiens GN=HSP90AB1 PE=1 SV=4			0	99	EGLELPEDEEEKK		missed K-K@12	0.0015867	1543.73	772.871	1543.73	772.87	2	15	1.1.1.2196.22	0	34.7519	124164	34.6886
4	47.22	47.22	30.39	27.9	26.24	sp|P08238|HS90B_HUMAN	Heat shock protein HSP 90-beta OS=Homo sapiens GN=HSP90AB1 PE=1 SV=4			0	99	EGLELPEDEEEKK		missed K-K@12	0.00183084	1543.73	772.871	1543.73	772.87	2	14	1.1.1.2204.27	0	35.0927	125289	34.6466
4	47.22	47.22	30.39	27.9	26.24	sp|P08238|HS90B_HUMAN	Heat shock protein HSP 90-beta OS=Homo sapiens GN=HSP90AB1 PE=1 SV=4			0	99	EGLELPEDEEEKK		missed K-K@12	0.00056663	1543.73	515.583	1543.73	515.582	3	10	1.1.1.2212.2	0	35.4093	48354.1	34.983
4	47.22	47.22	30.39	27.9	26.24	sp|P08238|HS90B_HUMAN	Heat shock protein HSP 90-beta OS=Homo sapiens GN=HSP90AB1 PE=1 SV=4			0	99	EGLELPEDEEEKK	Glu->pyro-Glu@N-term	missed K-K@12	-0.0031598	1525.71	763.863	1525.71	763.865	2	11	1.1.1.2393.22	0	43.0274	7714.62	43.1742
4	47.22	47.22	30.39	27.9	26.24	sp|P08238|HS90B_HUMAN	Heat shock protein HSP 90-beta OS=Homo sapiens GN=HSP90AB1 PE=1 SV=4			0	97.84	EGLELPEDEEEKK		missed K-K@12	-0.000854713	1543.72	772.87	1543.73	772.87	2	10	1.1.1.2234.17	0	36.3466	3210.7	36.1631
4	47.22	47.22	30.39	27.9	26.24	sp|P08238|HS90B_HUMAN	Heat shock protein HSP 90-beta OS=Homo sapiens GN=HSP90AB1 PE=1 SV=4			0	77.16	EGLELPEDEEEKK	Glu->pyro-Glu@N-term	missed K-K@12	-0.0031598	1525.71	763.863	1525.71	763.865	2	10	1.1.1.2396.17	0	43.1491	7714.62	43.1742
4	47.22	47.22	30.39	27.9	26.24	sp|P08238|HS90B_HUMAN	Heat shock protein HSP 90-beta OS=Homo sapiens GN=HSP90AB1 PE=1 SV=4			0	50.4	EGLELPEDEEEKK		missed K-K@12	0.0025808	1543.73	515.583	1543.73	515.582	3	6	1.1.1.2219.6	0	35.7083	9560.88	35.2781
4	47.22	47.22	30.39	27.9	26.24	sp|P08238|HS90B_HUMAN	Heat shock protein HSP 90-beta OS=Homo sapiens GN=HSP90AB1 PE=1 SV=4			0	42.3	EGLELPEDEEEKK		missed K-K@12	0.000854276	1543.73	772.87	1543.73	772.87	2	7	1.1.1.2252.26	0	37.1111	1371.19	37.0445
4	47.22	47.22	30.39	27.9	26.24	sp|P08238|HS90B_HUMAN	Heat shock protein HSP 90-beta OS=Homo sapiens GN=HSP90AB1 PE=1 SV=4			0	25.76	EGLELPEDEEEKK		missed K-K@12	0.00313011	1543.73	515.583	1543.73	515.582	3	6	1.1.1.2180.3	0	34.0657	66991.1	34.4787
4	47.22	47.22	30.39	27.9	26.24	sp|P08238|HS90B_HUMAN	Heat shock protein HSP 90-beta OS=Homo sapiens GN=HSP90AB1 PE=1 SV=4			0	24.34	EGLELPEDEEEKK		missed K-K@12	0.00294701	1543.73	515.583	1543.73	515.582	3	7	1.1.1.2210.4	0	35.3267	66598.4	34.899
4	47.22	47.22	30.39	27.9	26.24	sp|P08238|HS90B_HUMAN	Heat shock protein HSP 90-beta OS=Homo sapiens GN=HSP90AB1 PE=1 SV=4			0	96.6	EGLELPEDEEEKKK		missed K-K@12; missed K-K@13	0.00189123	1671.82	558.281	1671.82	558.281	3	11	1.1.1.2035.10	0	28.0062	208608	27.8285
4	47.22	47.22	30.39	27.9	26.24	sp|P08238|HS90B_HUMAN	Heat shock protein HSP 90-beta OS=Homo sapiens GN=HSP90AB1 PE=1 SV=4			0	85.97	EGLELPEDEEEKKK		missed K-K@12; missed K-K@13	0.00189123	1671.82	558.281	1671.82	558.281	3	10	1.1.1.2021.12	0	27.4229	195981	27.8285
4	47.22	47.22	30.39	27.9	26.24	sp|P08238|HS90B_HUMAN	Heat shock protein HSP 90-beta OS=Homo sapiens GN=HSP90AB1 PE=1 SV=4			0	90.06	EISDDEAEEEKGEK	Phospho(S)@3	missed K-G@11	0.00309243	1686.65	844.334	1686.65	844.333	2	10	1.1.1.1813.27	1	18.7351	9313.77	18.9202
4	47.22	47.22	30.39	27.9	26.24	sp|P08238|HS90B_HUMAN	Heat shock protein HSP 90-beta OS=Homo sapiens GN=HSP90AB1 PE=1 SV=4			0	97.24	EKEISDDEAEEEK	Phospho(S)@5	missed K-E@2	0.000466024	1629.63	815.822	1629.63	815.822	2	8	1.1.1.1824.38	1	19.2077	7204.29	18.8358
4	47.22	47.22	30.39	27.9	26.24	sp|P08238|HS90B_HUMAN	Heat shock protein HSP 90-beta OS=Homo sapiens GN=HSP90AB1 PE=1 SV=4			0	88.58	EKEISDDEAEEEK	Phospho(S)@5	missed K-E@2	0.000466024	1629.63	815.822	1629.63	815.822	2	7	1.1.1.1808.33	1	18.5299	7155.34	18.8358
4	47.22	47.22	30.39	27.9	26.24	sp|P08238|HS90B_HUMAN	Heat shock protein HSP 90-beta OS=Homo sapiens GN=HSP90AB1 PE=1 SV=4			0	99	EKEISDDEAEEEKGEK	Phospho(S)@5	missed K-E@2; missed K-G@13	0.00105093	1943.79	648.937	1943.79	648.937	3	13	1.1.1.1806.20	1	18.4352	10493.7	18.3323
4	47.22	47.22	30.39	27.9	26.24	sp|P08238|HS90B_HUMAN	Heat shock protein HSP 90-beta OS=Homo sapiens GN=HSP90AB1 PE=1 SV=4			0	59.82	EKYIDQEELNK		missed K-Y@2	-0.00115269	1407.69	704.851	1407.69	704.851	2	9	1.1.1.2008.15	0	26.8956	9860.89	26.4568
4	47.22	47.22	30.39	27.9	26.24	sp|P08238|HS90B_HUMAN	Heat shock protein HSP 90-beta OS=Homo sapiens GN=HSP90AB1 PE=1 SV=4			0	99	ELISNASDALDK			-0.00196608	1274.63	638.324	1274.64	638.325	2	11	1.1.1.2193.17	0	34.6215	3389.34	34.7307
4	47.22	47.22	30.39	27.9	26.24	sp|P08238|HS90B_HUMAN	Heat shock protein HSP 90-beta OS=Homo sapiens GN=HSP90AB1 PE=1 SV=4			0	99	ELISNASDALDK			0.000475336	1274.64	638.325	1274.64	638.325	2	16	1.1.1.2347.9	0	41.0864	521856	41.0765
4	47.22	47.22	30.39	27.9	26.24	sp|P08238|HS90B_HUMAN	Heat shock protein HSP 90-beta OS=Homo sapiens GN=HSP90AB1 PE=1 SV=4			0	99	ELISNASDALDK			0.000430272	1274.64	638.325	1274.64	638.325	2	13	1.1.1.2371.12	0	42.0911	32929.8	41.6604
4	47.22	47.22	30.39	27.9	26.24	sp|P08238|HS90B_HUMAN	Heat shock protein HSP 90-beta OS=Homo sapiens GN=HSP90AB1 PE=1 SV=4			0	99	ELISNASDALDK			0.000660597	1274.64	638.325	1274.64	638.325	2	11	1.1.1.3409.2	0	85.7118	101.065	85.7035
4	47.22	47.22	30.39	27.9	26.24	sp|P08238|HS90B_HUMAN	Heat shock protein HSP 90-beta OS=Homo sapiens GN=HSP90AB1 PE=1 SV=4			0	99	ELISNASDALDK			-0.00140079	1274.63	638.324	1274.64	638.325	2	12	1.1.1.2379.15	0	42.4308	17040.3	41.9948
4	47.22	47.22	30.39	27.9	26.24	sp|P08238|HS90B_HUMAN	Heat shock protein HSP 90-beta OS=Homo sapiens GN=HSP90AB1 PE=1 SV=4			0	99	ELISNASDALDK			0.00104062	1274.64	638.326	1274.64	638.325	2	12	1.1.1.2395.12	0	43.1029	6636.62	43.0484
4	47.22	47.22	30.39	27.9	26.24	sp|P08238|HS90B_HUMAN	Heat shock protein HSP 90-beta OS=Homo sapiens GN=HSP90AB1 PE=1 SV=4			0	99	ELISNASDALDK			-0.00140079	1274.63	638.324	1274.64	638.325	2	10	1.1.1.2420.14	0	44.1555	8386.91	43.7202
4	47.22	47.22	30.39	27.9	26.24	sp|P08238|HS90B_HUMAN	Heat shock protein HSP 90-beta OS=Homo sapiens GN=HSP90AB1 PE=1 SV=4			0	99	ELISNASDALDK	Deamidated(N)@5		0.000181649	1275.62	638.817	1275.62	638.817	2	13	1.1.1.2440.6	0	44.9915	92690.3	44.9838
4	47.22	47.22	30.39	27.9	26.24	sp|P08238|HS90B_HUMAN	Heat shock protein HSP 90-beta OS=Homo sapiens GN=HSP90AB1 PE=1 SV=4			0	99	ELISNASDALDK	Deamidated(N)@5		-0.00140527	1275.62	638.816	1275.62	638.817	2	12	1.1.1.2464.7	0	45.9988	17909	46.2849
4	47.22	47.22	30.39	27.9	26.24	sp|P08238|HS90B_HUMAN	Heat shock protein HSP 90-beta OS=Homo sapiens GN=HSP90AB1 PE=1 SV=4			0	99	ELISNASDALDK			0.000128194	1274.64	638.325	1274.64	638.325	2	9	1.1.1.2829.4	0	61.3433	586.723	61.2948
4	47.22	47.22	30.39	27.9	26.24	sp|P08238|HS90B_HUMAN	Heat shock protein HSP 90-beta OS=Homo sapiens GN=HSP90AB1 PE=1 SV=4			0	99	ELISNASDALDK			0.000475336	1274.64	638.325	1274.64	638.325	2	13	1.1.1.2355.11	0	41.4213	521856	41.0765
4	47.22	47.22	30.39	27.9	26.24	sp|P08238|HS90B_HUMAN	Heat shock protein HSP 90-beta OS=Homo sapiens GN=HSP90AB1 PE=1 SV=4			0	99	ELISNASDALDK			0.000597407	1274.64	638.325	1274.64	638.325	2	13	1.1.1.2363.9	0	41.754	202745	41.3265
4	47.22	47.22	30.39	27.9	26.24	sp|P08238|HS90B_HUMAN	Heat shock protein HSP 90-beta OS=Homo sapiens GN=HSP90AB1 PE=1 SV=4			0	99	ELISNASDALDK			-0.00140079	1274.63	638.324	1274.64	638.325	2	12	1.1.1.2411.16	0	43.7782	8488.83	43.7202
4	47.22	47.22	30.39	27.9	26.24	sp|P08238|HS90B_HUMAN	Heat shock protein HSP 90-beta OS=Homo sapiens GN=HSP90AB1 PE=1 SV=4			0	99	ELISNASDALDK	Deamidated(N)@5		0.00042579	1275.62	638.817	1275.62	638.817	2	10	1.1.1.2456.8	0	45.6636	22830.5	45.2351
4	47.22	47.22	30.39	27.9	26.24	sp|P08238|HS90B_HUMAN	Heat shock protein HSP 90-beta OS=Homo sapiens GN=HSP90AB1 PE=1 SV=4			0	99	ELISNASDALDK			0.000538527	1274.64	638.325	1274.64	638.325	2	8	1.1.1.3327.7	0	82.4088	535.053	82.485
4	47.22	47.22	30.39	27.9	26.24	sp|P08238|HS90B_HUMAN	Heat shock protein HSP 90-beta OS=Homo sapiens GN=HSP90AB1 PE=1 SV=4			0	99	ELISNASDALDK			-0.00145284	1274.63	638.324	1274.64	638.325	2	8	1.1.1.2745.2	0	57.8153	4210.54	58.2321
4	47.22	47.22	30.39	27.9	26.24	sp|P08238|HS90B_HUMAN	Heat shock protein HSP 90-beta OS=Homo sapiens GN=HSP90AB1 PE=1 SV=4			0	99	ELISNASDALDK			5.02465e-05	1274.64	638.325	1274.64	638.325	2	7	1.1.1.3283.6	0	80.5431	555.193	80.5774
4	47.22	47.22	30.39	27.9	26.24	sp|P08238|HS90B_HUMAN	Heat shock protein HSP 90-beta OS=Homo sapiens GN=HSP90AB1 PE=1 SV=4			0	99	ELISNASDALDK			0.00421446	1274.64	638.327	1274.64	638.325	2	8	1.1.1.2544.5	0	49.3614	1237.58	49.2709
4	47.22	47.22	30.39	27.9	26.24	sp|P08238|HS90B_HUMAN	Heat shock protein HSP 90-beta OS=Homo sapiens GN=HSP90AB1 PE=1 SV=4			0	99	ELISNASDALDK			0.00140684	1274.64	638.326	1274.64	638.325	2	8	1.1.1.2489.11	0	47.0527	1873.78	47.2093
4	47.22	47.22	30.39	27.9	26.24	sp|P08238|HS90B_HUMAN	Heat shock protein HSP 90-beta OS=Homo sapiens GN=HSP90AB1 PE=1 SV=4			0	99	ELISNASDALDK			0.000475336	1274.64	638.325	1274.64	638.325	2	12	1.1.1.2339.10	0	40.7527	518473	41.0765
4	47.22	47.22	30.39	27.9	26.24	sp|P08238|HS90B_HUMAN	Heat shock protein HSP 90-beta OS=Homo sapiens GN=HSP90AB1 PE=1 SV=4			0	99	ELISNASDALDK			-0.00140079	1274.63	638.324	1274.64	638.325	2	11	1.1.1.2403.11	0	43.4377	8488.83	43.7202
4	47.22	47.22	30.39	27.9	26.24	sp|P08238|HS90B_HUMAN	Heat shock protein HSP 90-beta OS=Homo sapiens GN=HSP90AB1 PE=1 SV=4			0	99	ELISNASDALDK	Deamidated(N)@5		0.000181649	1275.62	638.817	1275.62	638.817	2	9	1.1.1.2498.8	0	47.4297	1947.72	47.4202
4	47.22	47.22	30.39	27.9	26.24	sp|P08238|HS90B_HUMAN	Heat shock protein HSP 90-beta OS=Homo sapiens GN=HSP90AB1 PE=1 SV=4			0	99	ELISNASDALDK			6.406e-05	1274.64	638.325	1274.64	638.325	2	11	1.1.1.2387.13	0	42.7668	10609.1	42.3307
4	47.22	47.22	30.39	27.9	26.24	sp|P08238|HS90B_HUMAN	Heat shock protein HSP 90-beta OS=Homo sapiens GN=HSP90AB1 PE=1 SV=4			0	99	ELISNASDALDK			0.000294387	1274.64	638.325	1274.64	638.325	2	7	1.1.1.3311.7	0	81.7265	554.645	81.8877
4	47.22	47.22	30.39	27.9	26.24	sp|P08238|HS90B_HUMAN	Heat shock protein HSP 90-beta OS=Homo sapiens GN=HSP90AB1 PE=1 SV=4			0	99	ELISNASDALDK			5.02465e-05	1274.64	638.325	1274.64	638.325	2	8	1.1.1.3396.2	0	85.1602	82.5794	85.152
4	47.22	47.22	30.39	27.9	26.24	sp|P08238|HS90B_HUMAN	Heat shock protein HSP 90-beta OS=Homo sapiens GN=HSP90AB1 PE=1 SV=4			0	99	ELISNASDALDK	Deamidated(N)@5		0.0116563	1275.63	638.823	1275.62	638.817	2	8	1.1.1.2424.15	0	44.3252	1857.07	44.2255
4	47.22	47.22	30.39	27.9	26.24	sp|P08238|HS90B_HUMAN	Heat shock protein HSP 90-beta OS=Homo sapiens GN=HSP90AB1 PE=1 SV=4			0	99	ELISNASDALDK			-0.0100626	1274.63	638.32	1274.64	638.325	2	8	1.1.1.3027.2	0	69.7138	1030.06	70.0496
4	47.22	47.22	30.39	27.9	26.24	sp|P08238|HS90B_HUMAN	Heat shock protein HSP 90-beta OS=Homo sapiens GN=HSP90AB1 PE=1 SV=4			0	99	ELISNASDALDK			-0.00261631	1274.63	638.324	1274.64	638.325	2	7	1.1.1.3084.2	0	72.1126	447.333	72.1077
4	47.22	47.22	30.39	27.9	26.24	sp|P08238|HS90B_HUMAN	Heat shock protein HSP 90-beta OS=Homo sapiens GN=HSP90AB1 PE=1 SV=4			0	99	ELISNASDALDK	Deamidated(N)@5		-0.00140527	1275.62	638.816	1275.62	638.817	2	11	1.1.1.2480.5	0	46.6694	18120	46.2427
4	47.22	47.22	30.39	27.9	26.24	sp|P08238|HS90B_HUMAN	Heat shock protein HSP 90-beta OS=Homo sapiens GN=HSP90AB1 PE=1 SV=4			0	99	ELISNASDALDK			-0.000315964	1274.64	638.325	1274.64	638.325	2	7	1.1.1.3344.3	0	83.1296	503.301	83.0386
4	47.22	47.22	30.39	27.9	26.24	sp|P08238|HS90B_HUMAN	Heat shock protein HSP 90-beta OS=Homo sapiens GN=HSP90AB1 PE=1 SV=4			0	99	ELISNASDALDK	Deamidated(N)@5		0.000181649	1275.62	638.817	1275.62	638.817	2	11	1.1.1.2432.10	0	44.6582	92274.1	44.9838
4	47.22	47.22	30.39	27.9	26.24	sp|P08238|HS90B_HUMAN	Heat shock protein HSP 90-beta OS=Homo sapiens GN=HSP90AB1 PE=1 SV=4			0	99	ELISNASDALDK	Deamidated(N)@5		-0.00140527	1275.62	638.816	1275.62	638.817	2	11	1.1.1.2472.8	0	46.3366	17909	46.2849
4	47.22	47.22	30.39	27.9	26.24	sp|P08238|HS90B_HUMAN	Heat shock protein HSP 90-beta OS=Homo sapiens GN=HSP90AB1 PE=1 SV=4			0	99	ELISNASDALDK	Deamidated(N)@5		5.95785e-05	1275.62	638.817	1275.62	638.817	2	11	1.1.1.2448.9	0	45.3291	93554.2	44.9418
4	47.22	47.22	30.39	27.9	26.24	sp|P08238|HS90B_HUMAN	Heat shock protein HSP 90-beta OS=Homo sapiens GN=HSP90AB1 PE=1 SV=4			0	98.76	ELISNASDALDK			-0.00170286	1274.63	638.324	1274.64	638.325	2	6	1.1.1.2942.2	0	66.1157	547.404	66.1115
4	47.22	47.22	30.39	27.9	26.24	sp|P08238|HS90B_HUMAN	Heat shock protein HSP 90-beta OS=Homo sapiens GN=HSP90AB1 PE=1 SV=4			0	98.69	ELISNASDALDK			5.02465e-05	1274.64	638.325	1274.64	638.325	2	5	1.1.1.3463.5	0	87.9252	272.871	87.9178
4	47.22	47.22	30.39	27.9	26.24	sp|P08238|HS90B_HUMAN	Heat shock protein HSP 90-beta OS=Homo sapiens GN=HSP90AB1 PE=1 SV=4			0	98.5	ELISNASDALDK			-7.18236e-05	1274.64	638.325	1274.64	638.325	2	6	1.1.1.3265.5	0	79.7753	489.855	79.7679
4	47.22	47.22	30.39	27.9	26.24	sp|P08238|HS90B_HUMAN	Heat shock protein HSP 90-beta OS=Homo sapiens GN=HSP90AB1 PE=1 SV=4			0	98.5	ELISNASDALDK			0.000538527	1274.64	638.325	1274.64	638.325	2	6	1.1.1.3319.6	0	82.0669	508.5	82.1865
4	47.22	47.22	30.39	27.9	26.24	sp|P08238|HS90B_HUMAN	Heat shock protein HSP 90-beta OS=Homo sapiens GN=HSP90AB1 PE=1 SV=4			0	98.28	ELISNASDALDK			0.000904737	1274.64	638.325	1274.64	638.325	2	6	1.1.1.3256.2	0	79.3908	557.662	79.4285
4	47.22	47.22	30.39	27.9	26.24	sp|P08238|HS90B_HUMAN	Heat shock protein HSP 90-beta OS=Homo sapiens GN=HSP90AB1 PE=1 SV=4			0	97.4	ELISNASDALDK			0.000294387	1274.64	638.325	1274.64	638.325	2	5	1.1.1.3498.3	0	89.4126	221.72	89.4494
4	47.22	47.22	30.39	27.9	26.24	sp|P08238|HS90B_HUMAN	Heat shock protein HSP 90-beta OS=Homo sapiens GN=HSP90AB1 PE=1 SV=4			0	97.21	ELISNASDALDK			-0.000560104	1274.63	638.325	1274.64	638.325	2	6	1.1.1.3291.8	0	80.8859	390.737	80.8334
4	47.22	47.22	30.39	27.9	26.24	sp|P08238|HS90B_HUMAN	Heat shock protein HSP 90-beta OS=Homo sapiens GN=HSP90AB1 PE=1 SV=4			0	96.35	ELISNASDALDK			0.000904737	1274.64	638.325	1274.64	638.325	2	6	1.1.1.3301.4	0	81.3001	592.078	81.336
4	47.22	47.22	30.39	27.9	26.24	sp|P08238|HS90B_HUMAN	Heat shock protein HSP 90-beta OS=Homo sapiens GN=HSP90AB1 PE=1 SV=4			0	96.35	ELISNASDALDK			0.000294387	1274.64	638.325	1274.64	638.325	2	6	1.1.1.3336.5	0	82.7907	557.49	82.7833
4	47.22	47.22	30.39	27.9	26.24	sp|P08238|HS90B_HUMAN	Heat shock protein HSP 90-beta OS=Homo sapiens GN=HSP90AB1 PE=1 SV=4			0	94.75	ELISNASDALDK			0.00758038	1274.64	638.329	1274.64	638.325	2	8	1.1.1.2584.6	0	51.0458	4722.33	50.615
4	47.22	47.22	30.39	27.9	26.24	sp|P08238|HS90B_HUMAN	Heat shock protein HSP 90-beta OS=Homo sapiens GN=HSP90AB1 PE=1 SV=4			0	92.13	ELISNASDALDK			-0.0040222	1274.63	638.323	1274.64	638.325	2	6	1.1.1.2837.4	0	61.6813	592.462	61.6327
4	47.22	47.22	30.39	27.9	26.24	sp|P08238|HS90B_HUMAN	Heat shock protein HSP 90-beta OS=Homo sapiens GN=HSP90AB1 PE=1 SV=4			0	81.24	ELISNASDALDK			0.00127095	1274.64	638.326	1274.64	638.325	2	5	1.1.1.3452.3	0	87.4574	268.786	87.4925
4	47.22	47.22	30.39	27.9	26.24	sp|P08238|HS90B_HUMAN	Heat shock protein HSP 90-beta OS=Homo sapiens GN=HSP90AB1 PE=1 SV=4			0	62.75	ELISNASDALDK			-0.000315964	1274.64	638.325	1274.64	638.325	2	5	1.1.1.3274.5	0	80.1585	550.611	80.1936
4	47.22	47.22	30.39	27.9	26.24	sp|P08238|HS90B_HUMAN	Heat shock protein HSP 90-beta OS=Homo sapiens GN=HSP90AB1 PE=1 SV=4			0	62.75	ELISNASDALDK			-0.000926315	1274.63	638.324	1274.64	638.325	2	5	1.1.1.3520.2	0	90.3486	148.903	90.3854
4	47.22	47.22	30.39	27.9	26.24	sp|P08238|HS90B_HUMAN	Heat shock protein HSP 90-beta OS=Homo sapiens GN=HSP90AB1 PE=1 SV=4			0	50.14	ELISNASDALDK			-0.000315964	1274.64	638.325	1274.64	638.325	2	5	1.1.1.3481.5	0	88.6905	246.497	88.8958
4	47.22	47.22	30.39	27.9	26.24	sp|P08238|HS90B_HUMAN	Heat shock protein HSP 90-beta OS=Homo sapiens GN=HSP90AB1 PE=1 SV=4			0	39.47	ELISNASDALDK			0.0123983	1274.65	638.331	1274.64	638.325	2	5	1.1.1.3095.2	0	72.5794	2165.76	72.872
4	47.22	47.22	30.39	27.9	26.24	sp|P08238|HS90B_HUMAN	Heat shock protein HSP 90-beta OS=Homo sapiens GN=HSP90AB1 PE=1 SV=4			0	27.46	ELISNASDALDK			5.02465e-05	1274.64	638.325	1274.64	638.325	2	6	1.1.1.3793.2	0	95.8401	84.9138	95.8278
4	47.22	47.22	30.39	27.9	26.24	sp|P08238|HS90B_HUMAN	Heat shock protein HSP 90-beta OS=Homo sapiens GN=HSP90AB1 PE=1 SV=4			0	22.12	ELISNASDALDK			0.00513897	1274.64	638.328	1274.64	638.325	2	7	1.1.1.2610.9	0	52.1471	13997.1	51.9259
4	47.22	47.22	30.39	27.9	26.24	sp|P08238|HS90B_HUMAN	Heat shock protein HSP 90-beta OS=Homo sapiens GN=HSP90AB1 PE=1 SV=4			0	99	EQVANSAFVER			-0.00102131	1248.61	625.312	1248.61	625.312	2	12	1.1.1.2070.14	1	29.4623	27289.3	29.8668
4	47.22	47.22	30.39	27.9	26.24	sp|P08238|HS90B_HUMAN	Heat shock protein HSP 90-beta OS=Homo sapiens GN=HSP90AB1 PE=1 SV=4			0	99	EQVANSAFVER			-0.00102131	1248.61	625.312	1248.61	625.312	2	12	1.1.1.2086.12	1	30.1326	27981.2	29.8668
4	47.22	47.22	30.39	27.9	26.24	sp|P08238|HS90B_HUMAN	Heat shock protein HSP 90-beta OS=Homo sapiens GN=HSP90AB1 PE=1 SV=4			0	93.2	EQVANSAFVER	Deamidated(N)@5		-0.000782818	1249.59	625.804	1249.59	625.804	2	10	1.1.1.2106.10	1	30.9729	8124.59	31.0882
4	47.22	47.22	30.39	27.9	26.24	sp|P08238|HS90B_HUMAN	Heat shock protein HSP 90-beta OS=Homo sapiens GN=HSP90AB1 PE=1 SV=4			0	99	GVVDSEDLPLNISR			-0.000272837	1512.78	757.396	1512.78	757.396	2	23	1.1.1.2736.10	0	57.4443	552414	57.5593
4	47.22	47.22	30.39	27.9	26.24	sp|P08238|HS90B_HUMAN	Heat shock protein HSP 90-beta OS=Homo sapiens GN=HSP90AB1 PE=1 SV=4			0	99	GVVDSEDLPLNISR			-0.000272837	1512.78	757.396	1512.78	757.396	2	17	1.1.1.2737.11	0	57.4872	552414	57.5593
4	47.22	47.22	30.39	27.9	26.24	sp|P08238|HS90B_HUMAN	Heat shock protein HSP 90-beta OS=Homo sapiens GN=HSP90AB1 PE=1 SV=4			0	99	GVVDSEDLPLNISR			-0.000272837	1512.78	757.396	1512.78	757.396	2	23	1.1.1.2744.9	0	57.7791	552414	57.5593
4	47.22	47.22	30.39	27.9	26.24	sp|P08238|HS90B_HUMAN	Heat shock protein HSP 90-beta OS=Homo sapiens GN=HSP90AB1 PE=1 SV=4			0	99	GVVDSEDLPLNISR			-0.000272837	1512.78	757.396	1512.78	757.396	2	20	1.1.1.2746.12	0	57.8655	552414	57.5593
4	47.22	47.22	30.39	27.9	26.24	sp|P08238|HS90B_HUMAN	Heat shock protein HSP 90-beta OS=Homo sapiens GN=HSP90AB1 PE=1 SV=4			0	99	GVVDSEDLPLNISR			-0.000272837	1512.78	757.396	1512.78	757.396	2	18	1.1.1.2752.11	0	58.1178	433216	57.6849
4	47.22	47.22	30.39	27.9	26.24	sp|P08238|HS90B_HUMAN	Heat shock protein HSP 90-beta OS=Homo sapiens GN=HSP90AB1 PE=1 SV=4			0	99	GVVDSEDLPLNISR			-0.0012494	1512.78	757.396	1512.78	757.396	2	17	1.1.1.2760.12	0	58.4551	72098.4	58.0213
4	47.22	47.22	30.39	27.9	26.24	sp|P08238|HS90B_HUMAN	Heat shock protein HSP 90-beta OS=Homo sapiens GN=HSP90AB1 PE=1 SV=4			0	99	GVVDSEDLPLNISR			-0.00100526	1512.78	757.396	1512.78	757.396	2	17	1.1.1.2768.15	0	58.7954	17968.4	58.3582
4	47.22	47.22	30.39	27.9	26.24	sp|P08238|HS90B_HUMAN	Heat shock protein HSP 90-beta OS=Homo sapiens GN=HSP90AB1 PE=1 SV=4			0	99	GVVDSEDLPLNISR			-0.00100526	1512.78	757.396	1512.78	757.396	2	15	1.1.1.2776.8	0	59.1264	5766.81	59.075
4	47.22	47.22	30.39	27.9	26.24	sp|P08238|HS90B_HUMAN	Heat shock protein HSP 90-beta OS=Homo sapiens GN=HSP90AB1 PE=1 SV=4			0	99	GVVDSEDLPLNISR			-0.00512622	1512.77	757.394	1512.78	757.396	2	12	1.1.1.2784.5	0	59.4592	2576.31	59.4944
4	47.22	47.22	30.39	27.9	26.24	sp|P08238|HS90B_HUMAN	Heat shock protein HSP 90-beta OS=Homo sapiens GN=HSP90AB1 PE=1 SV=4			0	99	GVVDSEDLPLNISR			-0.00329516	1512.78	757.395	1512.78	757.396	2	12	1.1.1.2792.7	0	59.7947	2329.15	59.7448
4	47.22	47.22	30.39	27.9	26.24	sp|P08238|HS90B_HUMAN	Heat shock protein HSP 90-beta OS=Homo sapiens GN=HSP90AB1 PE=1 SV=4			0	99	GVVDSEDLPLNISR			-0.00292895	1512.78	757.395	1512.78	757.396	2	13	1.1.1.2801.7	0	60.1699	2402.09	60.2033
4	47.22	47.22	30.39	27.9	26.24	sp|P08238|HS90B_HUMAN	Heat shock protein HSP 90-beta OS=Homo sapiens GN=HSP90AB1 PE=1 SV=4			0	99	GVVDSEDLPLNISR			-0.00573657	1512.77	757.394	1512.78	757.396	2	13	1.1.1.2817.12	0	60.843	1974.36	60.8723
4	47.22	47.22	30.39	27.9	26.24	sp|P08238|HS90B_HUMAN	Heat shock protein HSP 90-beta OS=Homo sapiens GN=HSP90AB1 PE=1 SV=4			0	99	GVVDSEDLPLNISR			-0.000365475	1512.78	757.396	1512.78	757.396	2	13	1.1.1.2825.11	0	61.1801	1941.97	61.0834
4	47.22	47.22	30.39	27.9	26.24	sp|P08238|HS90B_HUMAN	Heat shock protein HSP 90-beta OS=Homo sapiens GN=HSP90AB1 PE=1 SV=4			0	99	GVVDSEDLPLNISR			-0.00317309	1512.78	757.395	1512.78	757.396	2	10	1.1.1.2898.9	0	64.262	892.205	64.2089
4	47.22	47.22	30.39	27.9	26.24	sp|P08238|HS90B_HUMAN	Heat shock protein HSP 90-beta OS=Homo sapiens GN=HSP90AB1 PE=1 SV=4			0	99	GVVDSEDLPLNISR			-0.00144084	1512.78	757.396	1512.78	757.396	2	10	1.1.1.3272.9	0	80.0763	692.547	80.1936
4	47.22	47.22	30.39	27.9	26.24	sp|P08238|HS90B_HUMAN	Heat shock protein HSP 90-beta OS=Homo sapiens GN=HSP90AB1 PE=1 SV=4			0	99	GVVDSEDLPLNISR			-0.00229533	1512.78	757.395	1512.78	757.396	2	11	1.1.1.3312.17	0	81.7776	730.835	81.8452
4	47.22	47.22	30.39	27.9	26.24	sp|P08238|HS90B_HUMAN	Heat shock protein HSP 90-beta OS=Homo sapiens GN=HSP90AB1 PE=1 SV=4			0	99	GVVDSEDLPLNISR			-0.00229533	1512.78	757.395	1512.78	757.396	2	10	1.1.1.3336.16	0	82.7998	819.287	82.8683
4	47.22	47.22	30.39	27.9	26.24	sp|P08238|HS90B_HUMAN	Heat shock protein HSP 90-beta OS=Homo sapiens GN=HSP90AB1 PE=1 SV=4			0	99	GVVDSEDLPLNISR			-0.00339396	1512.78	757.395	1512.78	757.396	2	14	1.1.1.3362.2	0	83.8178	87.4161	83.8396
4	47.22	47.22	30.39	27.9	26.24	sp|P08238|HS90B_HUMAN	Heat shock protein HSP 90-beta OS=Homo sapiens GN=HSP90AB1 PE=1 SV=4			0	99	GVVDSEDLPLNISR			-0.00290568	1512.78	757.395	1512.78	757.396	2	16	1.1.1.3371.2	0	84.1219	80.1619	84.0539
4	47.22	47.22	30.39	27.9	26.24	sp|P08238|HS90B_HUMAN	Heat shock protein HSP 90-beta OS=Homo sapiens GN=HSP90AB1 PE=1 SV=4			0	99	GVVDSEDLPLNISR			-0.0024174	1512.78	757.395	1512.78	757.396	2	14	1.1.1.3388.2	0	84.8247	111.13	84.8973
4	47.22	47.22	30.39	27.9	26.24	sp|P08238|HS90B_HUMAN	Heat shock protein HSP 90-beta OS=Homo sapiens GN=HSP90AB1 PE=1 SV=4			0	99	GVVDSEDLPLNISR			-0.0024174	1512.78	757.395	1512.78	757.396	2	12	1.1.1.3396.4	0	85.1685	161.599	85.152
4	47.22	47.22	30.39	27.9	26.24	sp|P08238|HS90B_HUMAN	Heat shock protein HSP 90-beta OS=Homo sapiens GN=HSP90AB1 PE=1 SV=4			0	99	GVVDSEDLPLNISR			-0.0011967	1512.78	757.396	1512.78	757.396	2	13	1.1.1.3404.4	0	85.5114	153.687	85.4916
4	47.22	47.22	30.39	27.9	26.24	sp|P08238|HS90B_HUMAN	Heat shock protein HSP 90-beta OS=Homo sapiens GN=HSP90AB1 PE=1 SV=4			0	99	GVVDSEDLPLNISR			-0.00266154	1512.78	757.395	1512.78	757.396	2	14	1.1.1.3412.2	0	85.84	284.378	85.9581
4	47.22	47.22	30.39	27.9	26.24	sp|P08238|HS90B_HUMAN	Heat shock protein HSP 90-beta OS=Homo sapiens GN=HSP90AB1 PE=1 SV=4			0	99	GVVDSEDLPLNISR			-0.00266154	1512.78	757.395	1512.78	757.396	2	18	1.1.1.3420.2	0	86.1782	411.229	86.1236
4	47.22	47.22	30.39	27.9	26.24	sp|P08238|HS90B_HUMAN	Heat shock protein HSP 90-beta OS=Homo sapiens GN=HSP90AB1 PE=1 SV=4			0	99	GVVDSEDLPLNISR			-0.00107463	1512.78	757.396	1512.78	757.396	2	12	1.1.1.3435.4	0	86.7541	483.459	86.7417
4	47.22	47.22	30.39	27.9	26.24	sp|P08238|HS90B_HUMAN	Heat shock protein HSP 90-beta OS=Homo sapiens GN=HSP90AB1 PE=1 SV=4			0	99	GVVDSEDLPLNISR			-0.00180705	1512.78	757.396	1512.78	757.396	2	10	1.1.1.3483.8	0	88.7782	455.127	88.8533
4	47.22	47.22	30.39	27.9	26.24	sp|P08238|HS90B_HUMAN	Heat shock protein HSP 90-beta OS=Homo sapiens GN=HSP90AB1 PE=1 SV=4			0	99	GVVDSEDLPLNISR			-0.00205119	1512.78	757.395	1512.78	757.396	2	10	1.1.1.3507.7	0	89.804	373.781	89.7048
4	47.22	47.22	30.39	27.9	26.24	sp|P08238|HS90B_HUMAN	Heat shock protein HSP 90-beta OS=Homo sapiens GN=HSP90AB1 PE=1 SV=4			0	99	GVVDSEDLPLNISR			-0.00290568	1512.78	757.395	1512.78	757.396	2	9	1.1.1.3515.4	0	90.1368	253.216	90.0874
4	47.22	47.22	30.39	27.9	26.24	sp|P08238|HS90B_HUMAN	Heat shock protein HSP 90-beta OS=Homo sapiens GN=HSP90AB1 PE=1 SV=4			0	99	GVVDSEDLPLNISR			-0.00229533	1512.78	757.395	1512.78	757.396	2	8	1.1.1.3523.6	0	90.4788	223.793	90.4279
4	47.22	47.22	30.39	27.9	26.24	sp|P08238|HS90B_HUMAN	Heat shock protein HSP 90-beta OS=Homo sapiens GN=HSP90AB1 PE=1 SV=4			0	99	GVVDSEDLPLNISR			-0.00229533	1512.78	757.395	1512.78	757.396	2	13	1.1.1.3793.3	0	95.8485	105.323	95.8702
4	47.22	47.22	30.39	27.9	26.24	sp|P08238|HS90B_HUMAN	Heat shock protein HSP 90-beta OS=Homo sapiens GN=HSP90AB1 PE=1 SV=4			0	99	GVVDSEDLPLNISR			-0.00302775	1512.78	757.395	1512.78	757.396	2	16	1.1.1.3803.2	0	96.2378	116.053	96.0407
4	47.22	47.22	30.39	27.9	26.24	sp|P08238|HS90B_HUMAN	Heat shock protein HSP 90-beta OS=Homo sapiens GN=HSP90AB1 PE=1 SV=4			0	99	GVVDSEDLPLNISR			-0.000487546	1512.78	757.396	1512.78	757.396	2	12	1.1.1.2809.11	0	60.507	2384.87	60.5371
4	47.22	47.22	30.39	27.9	26.24	sp|P08238|HS90B_HUMAN	Heat shock protein HSP 90-beta OS=Homo sapiens GN=HSP90AB1 PE=1 SV=4			0	99	GVVDSEDLPLNISR			-0.000487546	1512.78	757.396	1512.78	757.396	2	10	1.1.1.2950.8	0	66.456	535.17	66.4045
4	47.22	47.22	30.39	27.9	26.24	sp|P08238|HS90B_HUMAN	Heat shock protein HSP 90-beta OS=Homo sapiens GN=HSP90AB1 PE=1 SV=4			0	99	GVVDSEDLPLNISR			-0.00180705	1512.78	757.396	1512.78	757.396	2	9	1.1.1.3328.11	0	82.4548	810.931	82.5701
4	47.22	47.22	30.39	27.9	26.24	sp|P08238|HS90B_HUMAN	Heat shock protein HSP 90-beta OS=Homo sapiens GN=HSP90AB1 PE=1 SV=4			0	99	GVVDSEDLPLNISR			-0.00266154	1512.78	757.395	1512.78	757.396	2	9	1.1.1.3288.14	0	80.7631	667.746	80.7907
4	47.22	47.22	30.39	27.9	26.24	sp|P08238|HS90B_HUMAN	Heat shock protein HSP 90-beta OS=Homo sapiens GN=HSP90AB1 PE=1 SV=4			0	99	GVVDSEDLPLNISR			-0.00168498	1512.78	757.396	1512.78	757.396	2	10	1.1.1.3352.2	0	83.4645	94.9509	83.4962
4	47.22	47.22	30.39	27.9	26.24	sp|P08238|HS90B_HUMAN	Heat shock protein HSP 90-beta OS=Homo sapiens GN=HSP90AB1 PE=1 SV=4			0	99	GVVDSEDLPLNISR			-0.00229533	1512.78	757.395	1512.78	757.396	2	9	1.1.1.3344.9	0	83.1346	763.594	83.0386
4	47.22	47.22	30.39	27.9	26.24	sp|P08238|HS90B_HUMAN	Heat shock protein HSP 90-beta OS=Homo sapiens GN=HSP90AB1 PE=1 SV=4			0	99	GVVDSEDLPLNISR			-0.0024174	1512.78	757.395	1512.78	757.396	2	8	1.1.1.3467.6	0	88.0959	469.172	88.0453
4	47.22	47.22	30.39	27.9	26.24	sp|P08238|HS90B_HUMAN	Heat shock protein HSP 90-beta OS=Homo sapiens GN=HSP90AB1 PE=1 SV=4			0	99	GVVDSEDLPLNISR			-0.00229533	1512.78	757.395	1512.78	757.396	2	9	1.1.1.3303.9	0	81.3876	725.45	81.5895
4	47.22	47.22	30.39	27.9	26.24	sp|P08238|HS90B_HUMAN	Heat shock protein HSP 90-beta OS=Homo sapiens GN=HSP90AB1 PE=1 SV=4			0	99	GVVDSEDLPLNISR			-0.00083049	1512.78	757.396	1512.78	757.396	2	8	1.1.1.3255.6	0	79.3522	719.288	79.2618
4	47.22	47.22	30.39	27.9	26.24	sp|P08238|HS90B_HUMAN	Heat shock protein HSP 90-beta OS=Homo sapiens GN=HSP90AB1 PE=1 SV=4			0	99	GVVDSEDLPLNISR			0.000390211	1512.78	757.397	1512.78	757.396	2	8	1.1.1.3226.4	0	78.1437	485.432	78.011
4	47.22	47.22	30.39	27.9	26.24	sp|P08238|HS90B_HUMAN	Heat shock protein HSP 90-beta OS=Homo sapiens GN=HSP90AB1 PE=1 SV=4			0	99	GVVDSEDLPLNISR			-0.00180705	1512.78	757.396	1512.78	757.396	2	8	1.1.1.3443.14	0	87.0846	470.759	87.1539
4	47.22	47.22	30.39	27.9	26.24	sp|P08238|HS90B_HUMAN	Heat shock protein HSP 90-beta OS=Homo sapiens GN=HSP90AB1 PE=1 SV=4			0	99	GVVDSEDLPLNISR			-0.00302775	1512.78	757.395	1512.78	757.396	2	8	1.1.1.3264.7	0	79.7345	525.29	79.7256
4	47.22	47.22	30.39	27.9	26.24	sp|P08238|HS90B_HUMAN	Heat shock protein HSP 90-beta OS=Homo sapiens GN=HSP90AB1 PE=1 SV=4			0	99	GVVDSEDLPLNISR			-0.0024174	1512.78	757.395	1512.78	757.396	2	8	1.1.1.3451.12	0	87.4209	438.351	87.4925
4	47.22	47.22	30.39	27.9	26.24	sp|P08238|HS90B_HUMAN	Heat shock protein HSP 90-beta OS=Homo sapiens GN=HSP90AB1 PE=1 SV=4			0	99	GVVDSEDLPLNISR			-0.00229533	1512.78	757.395	1512.78	757.396	2	8	1.1.1.3280.11	0	80.4193	673.542	80.748
4	47.22	47.22	30.39	27.9	26.24	sp|P08238|HS90B_HUMAN	Heat shock protein HSP 90-beta OS=Homo sapiens GN=HSP90AB1 PE=1 SV=4			0	99	GVVDSEDLPLNISR			-0.0128931	1512.77	757.39	1512.78	757.396	2	8	1.1.1.3032.5	0	69.9293	396.074	69.9218
4	47.22	47.22	30.39	27.9	26.24	sp|P08238|HS90B_HUMAN	Heat shock protein HSP 90-beta OS=Homo sapiens GN=HSP90AB1 PE=1 SV=4			0	99	GVVDSEDLPLNISR			-0.00161561	1512.78	757.396	1512.78	757.396	2	11	1.1.1.2636.12	0	53.2427	5467.32	53.062
4	47.22	47.22	30.39	27.9	26.24	sp|P08238|HS90B_HUMAN	Heat shock protein HSP 90-beta OS=Homo sapiens GN=HSP90AB1 PE=1 SV=4			0	99	GVVDSEDLPLNISR			-0.0116724	1512.77	757.391	1512.78	757.396	2	8	1.1.1.3078.6	0	71.8612	707.175	71.7685
4	47.22	47.22	30.39	27.9	26.24	sp|P08238|HS90B_HUMAN	Heat shock protein HSP 90-beta OS=Homo sapiens GN=HSP90AB1 PE=1 SV=4			0	99	GVVDSEDLPLNISR			-0.00205119	1512.78	757.395	1512.78	757.396	2	8	1.1.1.3320.13	0	82.1154	676.632	82.1012
4	47.22	47.22	30.39	27.9	26.24	sp|P08238|HS90B_HUMAN	Heat shock protein HSP 90-beta OS=Homo sapiens GN=HSP90AB1 PE=1 SV=4			0	99	GVVDSEDLPLNISR			-0.00229533	1512.78	757.395	1512.78	757.396	2	9	1.1.1.3380.2	0	84.4844	153.32	84.5179
4	47.22	47.22	30.39	27.9	26.24	sp|P08238|HS90B_HUMAN	Heat shock protein HSP 90-beta OS=Homo sapiens GN=HSP90AB1 PE=1 SV=4			0	98.86	GVVDSEDLPLNISR			-0.00205119	1512.78	757.395	1512.78	757.396	2	7	1.1.1.3499.9	0	89.4603	375.453	89.4921
4	47.22	47.22	30.39	27.9	26.24	sp|P08238|HS90B_HUMAN	Heat shock protein HSP 90-beta OS=Homo sapiens GN=HSP90AB1 PE=1 SV=4			0	98.85	GVVDSEDLPLNISR			-0.000272837	1512.78	757.396	1512.78	757.396	2	11	1.1.1.2728.8	0	57.1043	509405	57.5173
4	47.22	47.22	30.39	27.9	26.24	sp|P08238|HS90B_HUMAN	Heat shock protein HSP 90-beta OS=Homo sapiens GN=HSP90AB1 PE=1 SV=4			0	97.96	GVVDSEDLPLNISR			-0.0035393	1512.77	757.395	1512.78	757.396	2	9	1.1.1.2833.10	0	61.5175	1303.45	61.5061
4	47.22	47.22	30.39	27.9	26.24	sp|P08238|HS90B_HUMAN	Heat shock protein HSP 90-beta OS=Homo sapiens GN=HSP90AB1 PE=1 SV=4			0	97.73	GVVDSEDLPLNISR			-0.00107463	1512.78	757.396	1512.78	757.396	2	7	1.1.1.3491.11	0	89.1213	386.15	89.1939
4	47.22	47.22	30.39	27.9	26.24	sp|P08238|HS90B_HUMAN	Heat shock protein HSP 90-beta OS=Homo sapiens GN=HSP90AB1 PE=1 SV=4			0	97.58	GVVDSEDLPLNISR			0.000290452	1512.78	757.397	1512.78	757.396	2	7	1.1.1.3200.4	0	77.0421	460.461	77.0781
4	47.22	47.22	30.39	27.9	26.24	sp|P08238|HS90B_HUMAN	Heat shock protein HSP 90-beta OS=Homo sapiens GN=HSP90AB1 PE=1 SV=4			0	95.2	GVVDSEDLPLNISR			-0.000365475	1512.78	757.396	1512.78	757.396	2	7	1.1.1.2881.5	0	63.5385	984.019	63.616
4	47.22	47.22	30.39	27.9	26.24	sp|P08238|HS90B_HUMAN	Heat shock protein HSP 90-beta OS=Homo sapiens GN=HSP90AB1 PE=1 SV=4			0	93.85	GVVDSEDLPLNISR			-0.00117439	1512.78	757.396	1512.78	757.396	2	8	1.1.1.3090.6	0	72.3705	3701.57	72.7018
4	47.22	47.22	30.39	27.9	26.24	sp|P08238|HS90B_HUMAN	Heat shock protein HSP 90-beta OS=Homo sapiens GN=HSP90AB1 PE=1 SV=4			0	90.76	GVVDSEDLPLNISR			-0.00292895	1512.78	757.395	1512.78	757.396	2	7	1.1.1.2932.5	0	65.6987	715.336	65.6918
4	47.22	47.22	30.39	27.9	26.24	sp|P08238|HS90B_HUMAN	Heat shock protein HSP 90-beta OS=Homo sapiens GN=HSP90AB1 PE=1 SV=4			0	90.25	GVVDSEDLPLNISR			-0.00168498	1512.78	757.396	1512.78	757.396	2	6	1.1.1.3475.13	0	88.442	376.361	88.428
4	47.22	47.22	30.39	27.9	26.24	sp|P08238|HS90B_HUMAN	Heat shock protein HSP 90-beta OS=Homo sapiens GN=HSP90AB1 PE=1 SV=4			0	87.12	GVVDSEDLPLNISR			0.000244876	1512.78	757.397	1512.78	757.396	2	7	1.1.1.2920.9	0	65.1936	641.061	64.9287
4	47.22	47.22	30.39	27.9	26.24	sp|P08238|HS90B_HUMAN	Heat shock protein HSP 90-beta OS=Homo sapiens GN=HSP90AB1 PE=1 SV=4			0	85.36	GVVDSEDLPLNISR			-0.000731686	1512.78	757.396	1512.78	757.396	2	7	1.1.1.2986.6	0	67.9816	593.87	68.0159
4	47.22	47.22	30.39	27.9	26.24	sp|P08238|HS90B_HUMAN	Heat shock protein HSP 90-beta OS=Homo sapiens GN=HSP90AB1 PE=1 SV=4			0	81.53	GVVDSEDLPLNISR			-0.00068611	1512.78	757.396	1512.78	757.396	2	7	1.1.1.3107.6	0	73.0928	3829.98	72.6593
4	47.22	47.22	30.39	27.9	26.24	sp|P08238|HS90B_HUMAN	Heat shock protein HSP 90-beta OS=Homo sapiens GN=HSP90AB1 PE=1 SV=4			0	74.16	GVVDSEDLPLNISR			0.00688225	1512.79	757.4	1512.78	757.396	2	6	1.1.1.3184.3	0	76.3633	490.662	76.3573
4	47.22	47.22	30.39	27.9	26.24	sp|P08238|HS90B_HUMAN	Heat shock protein HSP 90-beta OS=Homo sapiens GN=HSP90AB1 PE=1 SV=4			0	70.38	GVVDSEDLPLNISR	Deamidated(N)@11		0.0106136	1513.77	757.894	1513.76	757.888	2	7	1.1.1.2903.9	0	64.4738	461.518	64.3784
4	47.22	47.22	30.39	27.9	26.24	sp|P08238|HS90B_HUMAN	Heat shock protein HSP 90-beta OS=Homo sapiens GN=HSP90AB1 PE=1 SV=4			0	63.14	GVVDSEDLPLNISR			-0.00610278	1512.77	757.393	1512.78	757.396	2	6	1.1.1.2872.13	0	63.164	811.305	63.1925
4	47.22	47.22	30.39	27.9	26.24	sp|P08238|HS90B_HUMAN	Heat shock protein HSP 90-beta OS=Homo sapiens GN=HSP90AB1 PE=1 SV=4			0	58.25	GVVDSEDLPLNISR			0.000611087	1512.78	757.397	1512.78	757.396	2	6	1.1.1.2911.7	0	64.8108	627.281	64.8866
4	47.22	47.22	30.39	27.9	26.24	sp|P08238|HS90B_HUMAN	Heat shock protein HSP 90-beta OS=Homo sapiens GN=HSP90AB1 PE=1 SV=4			0	35.65	GVVDSEDLPLNISR			-0.0035393	1512.77	757.395	1512.78	757.396	2	5	1.1.1.2834.11	0	61.5605	1303.45	61.5061
4	47.22	47.22	30.39	27.9	26.24	sp|P08238|HS90B_HUMAN	Heat shock protein HSP 90-beta OS=Homo sapiens GN=HSP90AB1 PE=1 SV=4			0	33.03	GVVDSEDLPLNISR			-0.000220139	1512.78	757.396	1512.78	757.396	2	6	1.1.1.3247.6	0	79.0189	777.594	79.0115
4	47.22	47.22	30.39	27.9	26.24	sp|P08238|HS90B_HUMAN	Heat shock protein HSP 90-beta OS=Homo sapiens GN=HSP90AB1 PE=1 SV=4			0	30.43	GVVDSEDLPLNISR			-2.86964e-05	1512.78	757.396	1512.78	757.396	2	6	1.1.1.2646.14	0	53.6645	1010.97	53.566
4	47.22	47.22	30.39	27.9	26.24	sp|P08238|HS90B_HUMAN	Heat shock protein HSP 90-beta OS=Homo sapiens GN=HSP90AB1 PE=1 SV=4			0	25.66	GVVDSEDLPLNISR			-0.0012494	1512.78	757.396	1512.78	757.396	2	6	1.1.1.2720.14	0	56.7709	12312.7	57.1795
4	47.22	47.22	30.39	27.9	26.24	sp|P08238|HS90B_HUMAN	Heat shock protein HSP 90-beta OS=Homo sapiens GN=HSP90AB1 PE=1 SV=4			0	99	IDIIPNPQER			-0.000757345	1193.64	597.827	1193.64	597.828	2	11	1.1.1.2459.5	1	45.7869	20080.1	45.8221
4	47.22	47.22	30.39	27.9	26.24	sp|P08238|HS90B_HUMAN	Heat shock protein HSP 90-beta OS=Homo sapiens GN=HSP90AB1 PE=1 SV=4			0	99	IDIIPNPQER			-0.000757345	1193.64	597.827	1193.64	597.828	2	11	1.1.1.2467.3	1	46.1216	19888.7	45.9902
4	47.22	47.22	30.39	27.9	26.24	sp|P08238|HS90B_HUMAN	Heat shock protein HSP 90-beta OS=Homo sapiens GN=HSP90AB1 PE=1 SV=4			0	99	IDIIPNPQER			0.000829573	1193.64	597.828	1193.64	597.828	2	9	1.1.1.2443.5	1	45.1163	10890.9	45.5284
4	47.22	47.22	30.39	27.9	26.24	sp|P08238|HS90B_HUMAN	Heat shock protein HSP 90-beta OS=Homo sapiens GN=HSP90AB1 PE=1 SV=4			0	99	IDIIPNPQER			-0.00100149	1193.64	597.827	1193.64	597.828	2	9	1.1.1.2475.3	1	46.4582	12121.4	46.2006
4	47.22	47.22	30.39	27.9	26.24	sp|P08238|HS90B_HUMAN	Heat shock protein HSP 90-beta OS=Homo sapiens GN=HSP90AB1 PE=1 SV=4			0	99	IEDVGSDEEDDSGK	Phospho(S)@6		-0.000288096	1573.57	787.791	1573.57	787.791	2	13	1.1.1.1935.28	1	23.849	12561.5	23.4044
4	47.22	47.22	30.39	27.9	26.24	sp|P08238|HS90B_HUMAN	Heat shock protein HSP 90-beta OS=Homo sapiens GN=HSP90AB1 PE=1 SV=4			0	99	IEDVGSDEEDDSGK	Phospho(S)@6		-0.000410166	1573.57	787.79	1573.57	787.791	2	14	1.1.1.1927.28	1	23.5133	13296.1	23.3629
4	47.22	47.22	30.39	27.9	26.24	sp|P08238|HS90B_HUMAN	Heat shock protein HSP 90-beta OS=Homo sapiens GN=HSP90AB1 PE=1 SV=4			0	99	IEDVGSDEEDDSGK			0.00178412	1493.6	747.808	1493.6	747.808	2	9	1.1.1.1838.26	1	19.787	3000.96	19.5526
4	47.22	47.22	30.39	27.9	26.24	sp|P08238|HS90B_HUMAN	Heat shock protein HSP 90-beta OS=Homo sapiens GN=HSP90AB1 PE=1 SV=4			0	76.54	IEDVGSDEEDDSGK	Phospho(S)@6		-0.000288096	1573.57	787.791	1573.57	787.791	2	7	1.1.1.1939.31	1	24.0194	5843.98	23.5711
4	47.22	47.22	30.39	27.9	26.24	sp|P08238|HS90B_HUMAN	Heat shock protein HSP 90-beta OS=Homo sapiens GN=HSP90AB1 PE=1 SV=4			0	99	IEDVGSDEEDDSGKDK	Phospho(S)@6	missed K-D@14	0.000782385	1816.69	909.352	1816.69	909.352	2	23	1.1.1.1838.35	1	19.7945	188986	19.8881
4	47.22	47.22	30.39	27.9	26.24	sp|P08238|HS90B_HUMAN	Heat shock protein HSP 90-beta OS=Homo sapiens GN=HSP90AB1 PE=1 SV=4			0	99	IEDVGSDEEDDSGKDK	Phospho(S)@6	missed K-D@14	0.000782385	1816.69	909.352	1816.69	909.352	2	21	1.1.1.1846.33	1	20.1273	188986	19.8881
4	47.22	47.22	30.39	27.9	26.24	sp|P08238|HS90B_HUMAN	Heat shock protein HSP 90-beta OS=Homo sapiens GN=HSP90AB1 PE=1 SV=4			0	99	IEDVGSDEEDDSGKDK	Phospho(S)@6	missed K-D@14	-0.000926605	1816.69	909.351	1816.69	909.352	2	14	1.1.1.1822.37	1	19.1225	1557.64	19.131
4	47.22	47.22	30.39	27.9	26.24	sp|P08238|HS90B_HUMAN	Heat shock protein HSP 90-beta OS=Homo sapiens GN=HSP90AB1 PE=1 SV=4			0	99	IEDVGSDEEDDSGKDK	Phospho(S)@6	missed K-D@14	-0.00300181	1816.69	909.35	1816.69	909.352	2	12	1.1.1.1870.36	1	21.1368	1739.43	21.146
4	47.22	47.22	30.39	27.9	26.24	sp|P08238|HS90B_HUMAN	Heat shock protein HSP 90-beta OS=Homo sapiens GN=HSP90AB1 PE=1 SV=4			0	99	IEDVGSDEEDDSGKDK	Phospho(S)@6	missed K-D@14	0.000782385	1816.69	909.352	1816.69	909.352	2	10	1.1.1.1830.37	1	19.4599	153963	19.8465
4	47.22	47.22	30.39	27.9	26.24	sp|P08238|HS90B_HUMAN	Heat shock protein HSP 90-beta OS=Homo sapiens GN=HSP90AB1 PE=1 SV=4			0	99	IEDVGSDEEDDSGKDK	Phospho(S)@6	missed K-D@14	0.000782385	1816.69	909.352	1816.69	909.352	2	10	1.1.1.1862.37	1	20.8011	12892.1	20.3459
4	47.22	47.22	30.39	27.9	26.24	sp|P08238|HS90B_HUMAN	Heat shock protein HSP 90-beta OS=Homo sapiens GN=HSP90AB1 PE=1 SV=4			0	99	IEDVGSDEEDDSGKDKK	Phospho(S)@6	missed K-D@14; missed K-K@16	-0.000791665	1944.78	973.399	1944.78	973.399	2	11	1.1.1.1742.33	1	15.7844	2092	15.7543
4	47.22	47.22	30.39	27.9	26.24	sp|P08238|HS90B_HUMAN	Heat shock protein HSP 90-beta OS=Homo sapiens GN=HSP90AB1 PE=1 SV=4			0	99	IEDVGSDEEDDSGKDKK	Phospho(S)@6	missed K-D@14; missed K-K@16	0.00153233	1944.79	649.269	1944.78	649.268	3	12	1.1.1.1741.18	1	15.73	25026	15.7125
4	47.22	47.22	30.39	27.9	26.24	sp|P08238|HS90B_HUMAN	Heat shock protein HSP 90-beta OS=Homo sapiens GN=HSP90AB1 PE=1 SV=4			0	96.78	IEDVGSDEEDDSGKDKK	Phospho(S)@6	missed K-D@14; missed K-K@16	0.00153233	1944.79	649.269	1944.78	649.268	3	9	1.1.1.1749.21	1	16.0677	25026	15.7125
4	47.22	47.22	30.39	27.9	26.24	sp|P08238|HS90B_HUMAN	Heat shock protein HSP 90-beta OS=Homo sapiens GN=HSP90AB1 PE=1 SV=4			0	94.43	IEDVGSDEEDDSGKDKK	Phospho(S)@6; Phospho(S)@12	missed K-D@14; missed K-K@16	0.0149219	2024.77	1013.39	2024.75	1013.38	2	8	1.1.1.1757.39	1	16.4199	376.114	16.5509
4	47.22	47.22	30.39	27.9	26.24	sp|P08238|HS90B_HUMAN	Heat shock protein HSP 90-beta OS=Homo sapiens GN=HSP90AB1 PE=1 SV=4			0	99	NPDDITQEEYGEFYK			0.00289547	1846.79	924.404	1846.79	924.402	2	20	1.1.1.2649.28	1	53.8025	735998	54.1946
4	47.22	47.22	30.39	27.9	26.24	sp|P08238|HS90B_HUMAN	Heat shock protein HSP 90-beta OS=Homo sapiens GN=HSP90AB1 PE=1 SV=4			0	99	NPDDITQEEYGEFYK			0.00289547	1846.79	924.404	1846.79	924.402	2	22	1.1.1.2657.20	1	54.1379	1077224	54.4448
4	47.22	47.22	30.39	27.9	26.24	sp|P08238|HS90B_HUMAN	Heat shock protein HSP 90-beta OS=Homo sapiens GN=HSP90AB1 PE=1 SV=4			0	99	NPDDITQEEYGEFYK			0.00289547	1846.79	924.404	1846.79	924.402	2	21	1.1.1.2665.25	1	54.4697	1094453	54.4865
4	47.22	47.22	30.39	27.9	26.24	sp|P08238|HS90B_HUMAN	Heat shock protein HSP 90-beta OS=Homo sapiens GN=HSP90AB1 PE=1 SV=4			0	99	NPDDITQEEYGEFYK			0.00289547	1846.79	924.404	1846.79	924.402	2	21	1.1.1.2673.24	1	54.8021	1094453	54.4865
4	47.22	47.22	30.39	27.9	26.24	sp|P08238|HS90B_HUMAN	Heat shock protein HSP 90-beta OS=Homo sapiens GN=HSP90AB1 PE=1 SV=4			0	99	NPDDITQEEYGEFYK			0.00289547	1846.79	924.404	1846.79	924.402	2	19	1.1.1.2681.21	1	55.1351	861456	54.6958
4	47.22	47.22	30.39	27.9	26.24	sp|P08238|HS90B_HUMAN	Heat shock protein HSP 90-beta OS=Homo sapiens GN=HSP90AB1 PE=1 SV=4			0	99	NPDDITQEEYGEFYK			0.00155269	1846.79	924.403	1846.79	924.402	2	19	1.1.1.2689.29	1	55.4779	191036	55.0309
4	47.22	47.22	30.39	27.9	26.24	sp|P08238|HS90B_HUMAN	Heat shock protein HSP 90-beta OS=Homo sapiens GN=HSP90AB1 PE=1 SV=4			0	99	NPDDITQEEYGEFYK			0.00130855	1846.79	924.403	1846.79	924.402	2	19	1.1.1.2697.28	1	55.8141	61153.1	55.3667
4	47.22	47.22	30.39	27.9	26.24	sp|P08238|HS90B_HUMAN	Heat shock protein HSP 90-beta OS=Homo sapiens GN=HSP90AB1 PE=1 SV=4			0	99	NPDDITQEEYGEFYK			-0.00113286	1846.79	924.402	1846.79	924.402	2	19	1.1.1.2705.20	1	56.1429	41125.6	55.7039
4	47.22	47.22	30.39	27.9	26.24	sp|P08238|HS90B_HUMAN	Heat shock protein HSP 90-beta OS=Homo sapiens GN=HSP90AB1 PE=1 SV=4			0	99	NPDDITQEEYGEFYK			-0.00174321	1846.79	924.401	1846.79	924.402	2	18	1.1.1.2721.24	1	56.8215	18412.7	56.8408
4	47.22	47.22	30.39	27.9	26.24	sp|P08238|HS90B_HUMAN	Heat shock protein HSP 90-beta OS=Homo sapiens GN=HSP90AB1 PE=1 SV=4			0	99	NPDDITQEEYGEFYK			-0.00174321	1846.79	924.401	1846.79	924.402	2	15	1.1.1.2729.26	1	57.1619	18412.7	56.8408
4	47.22	47.22	30.39	27.9	26.24	sp|P08238|HS90B_HUMAN	Heat shock protein HSP 90-beta OS=Homo sapiens GN=HSP90AB1 PE=1 SV=4			0	99	NPDDITQEEYGEFYK	Deamidated(N)@1		0.00374457	1847.78	924.896	1847.77	924.894	2	17	1.1.1.2736.26	1	57.4577	16040.9	57.6431
4	47.22	47.22	30.39	27.9	26.24	sp|P08238|HS90B_HUMAN	Heat shock protein HSP 90-beta OS=Homo sapiens GN=HSP90AB1 PE=1 SV=4			0	99	NPDDITQEEYGEFYK			-0.00125493	1846.79	924.402	1846.79	924.402	2	17	1.1.1.2745.25	1	57.8345	7287.72	57.8529
4	47.22	47.22	30.39	27.9	26.24	sp|P08238|HS90B_HUMAN	Heat shock protein HSP 90-beta OS=Homo sapiens GN=HSP90AB1 PE=1 SV=4			0	99	NPDDITQEEYGEFYK			-0.00125493	1846.79	924.402	1846.79	924.402	2	15	1.1.1.2753.23	1	58.17	7287.72	57.8529
4	47.22	47.22	30.39	27.9	26.24	sp|P08238|HS90B_HUMAN	Heat shock protein HSP 90-beta OS=Homo sapiens GN=HSP90AB1 PE=1 SV=4			0	99	NPDDITQEEYGEFYK			0.00228512	1846.79	924.403	1846.79	924.402	2	16	1.1.1.2761.24	1	58.5075	5489.53	58.4422
4	47.22	47.22	30.39	27.9	26.24	sp|P08238|HS90B_HUMAN	Heat shock protein HSP 90-beta OS=Homo sapiens GN=HSP90AB1 PE=1 SV=4			0	99	NPDDITQEEYGEFYK			-0.000904646	1846.79	924.402	1846.79	924.402	2	17	1.1.1.2793.11	1	59.848	3773.03	59.9115
4	47.22	47.22	30.39	27.9	26.24	sp|P08238|HS90B_HUMAN	Heat shock protein HSP 90-beta OS=Homo sapiens GN=HSP90AB1 PE=1 SV=4			0	99	NPDDITQEEYGEFYK			-0.000294295	1846.79	924.402	1846.79	924.402	2	15	1.1.1.2801.14	1	60.1757	4091.66	60.245
4	47.22	47.22	30.39	27.9	26.24	sp|P08238|HS90B_HUMAN	Heat shock protein HSP 90-beta OS=Homo sapiens GN=HSP90AB1 PE=1 SV=4			0	99	NPDDITQEEYGEFYK			7.19156e-05	1846.79	924.402	1846.79	924.402	2	14	1.1.1.2817.26	1	60.8547	4158.7	60.7464
4	47.22	47.22	30.39	27.9	26.24	sp|P08238|HS90B_HUMAN	Heat shock protein HSP 90-beta OS=Homo sapiens GN=HSP90AB1 PE=1 SV=4			0	99	NPDDITQEEYGEFYK			-0.00261363	1846.79	924.401	1846.79	924.402	2	16	1.1.1.2857.26	1	62.5431	2666.21	62.349
4	47.22	47.22	30.39	27.9	26.24	sp|P08238|HS90B_HUMAN	Heat shock protein HSP 90-beta OS=Homo sapiens GN=HSP90AB1 PE=1 SV=4			0	99	NPDDITQEEYGEFYK			0.00524267	1846.8	924.405	1846.79	924.402	2	15	1.1.1.3252.6	1	79.2359	1390.8	79.1791
4	47.22	47.22	30.39	27.9	26.24	sp|P08238|HS90B_HUMAN	Heat shock protein HSP 90-beta OS=Homo sapiens GN=HSP90AB1 PE=1 SV=4			0	99	NPDDITQEEYGEFYK			-0.00147118	1846.79	924.401	1846.79	924.402	2	13	1.1.1.3260.17	1	79.5733	1458.02	79.641
4	47.22	47.22	30.39	27.9	26.24	sp|P08238|HS90B_HUMAN	Heat shock protein HSP 90-beta OS=Homo sapiens GN=HSP90AB1 PE=1 SV=4			0	99	NPDDITQEEYGEFYK			-0.00147118	1846.79	924.401	1846.79	924.402	2	12	1.1.1.3268.22	1	79.917	1585.34	80.1081
4	47.22	47.22	30.39	27.9	26.24	sp|P08238|HS90B_HUMAN	Heat shock protein HSP 90-beta OS=Homo sapiens GN=HSP90AB1 PE=1 SV=4			0	99	NPDDITQEEYGEFYK			0.0038999	1846.79	924.404	1846.79	924.402	2	16	1.1.1.3300.5	1	81.2697	1815.5	81.1717
4	47.22	47.22	30.39	27.9	26.24	sp|P08238|HS90B_HUMAN	Heat shock protein HSP 90-beta OS=Homo sapiens GN=HSP90AB1 PE=1 SV=4			0	99	NPDDITQEEYGEFYK			-0.00232567	1846.79	924.401	1846.79	924.402	2	13	1.1.1.3308.19	1	81.6086	1651.92	81.5469
4	47.22	47.22	30.39	27.9	26.24	sp|P08238|HS90B_HUMAN	Heat shock protein HSP 90-beta OS=Homo sapiens GN=HSP90AB1 PE=1 SV=4			0	99	NPDDITQEEYGEFYK			0.000848149	1846.79	924.403	1846.79	924.402	2	12	1.1.1.3316.21	1	81.9514	2032.97	82.2291
4	47.22	47.22	30.39	27.9	26.24	sp|P08238|HS90B_HUMAN	Heat shock protein HSP 90-beta OS=Homo sapiens GN=HSP90AB1 PE=1 SV=4			0	99	NPDDITQEEYGEFYK			0.000848149	1846.79	924.403	1846.79	924.402	2	13	1.1.1.3324.26	1	82.2967	2032.97	82.2291
4	47.22	47.22	30.39	27.9	26.24	sp|P08238|HS90B_HUMAN	Heat shock protein HSP 90-beta OS=Homo sapiens GN=HSP90AB1 PE=1 SV=4			0	99	NPDDITQEEYGEFYK			-0.00195946	1846.79	924.401	1846.79	924.402	2	13	1.1.1.3332.27	1	82.6387	1931.6	82.5701
4	47.22	47.22	30.39	27.9	26.24	sp|P08238|HS90B_HUMAN	Heat shock protein HSP 90-beta OS=Homo sapiens GN=HSP90AB1 PE=1 SV=4			0	99	NPDDITQEEYGEFYK			-0.00195946	1846.79	924.401	1846.79	924.402	2	20	1.1.1.3348.2	1	83.3093	2006.99	83.0386
4	47.22	47.22	30.39	27.9	26.24	sp|P08238|HS90B_HUMAN	Heat shock protein HSP 90-beta OS=Homo sapiens GN=HSP90AB1 PE=1 SV=4			0	99	NPDDITQEEYGEFYK			-0.00147118	1846.79	924.401	1846.79	924.402	2	21	1.1.1.3357.2	1	83.6263	263.989	83.5791
4	47.22	47.22	30.39	27.9	26.24	sp|P08238|HS90B_HUMAN	Heat shock protein HSP 90-beta OS=Homo sapiens GN=HSP90AB1 PE=1 SV=4			0	99	NPDDITQEEYGEFYK			-0.00256981	1846.79	924.401	1846.79	924.402	2	16	1.1.1.3365.3	1	83.9593	262.244	83.9644
4	47.22	47.22	30.39	27.9	26.24	sp|P08238|HS90B_HUMAN	Heat shock protein HSP 90-beta OS=Homo sapiens GN=HSP90AB1 PE=1 SV=4			0	99	NPDDITQEEYGEFYK			-0.00134911	1846.79	924.402	1846.79	924.402	2	19	1.1.1.3374.3	1	84.2643	402.278	84.3524
4	47.22	47.22	30.39	27.9	26.24	sp|P08238|HS90B_HUMAN	Heat shock protein HSP 90-beta OS=Homo sapiens GN=HSP90AB1 PE=1 SV=4			0	99	NPDDITQEEYGEFYK			-0.00269188	1846.79	924.401	1846.79	924.402	2	17	1.1.1.3382.4	1	84.5879	396.196	84.5595
4	47.22	47.22	30.39	27.9	26.24	sp|P08238|HS90B_HUMAN	Heat shock protein HSP 90-beta OS=Homo sapiens GN=HSP90AB1 PE=1 SV=4			0	99	NPDDITQEEYGEFYK			-0.00171532	1846.79	924.401	1846.79	924.402	2	19	1.1.1.3390.3	1	84.9346	440.924	85.1945
4	47.22	47.22	30.39	27.9	26.24	sp|P08238|HS90B_HUMAN	Heat shock protein HSP 90-beta OS=Homo sapiens GN=HSP90AB1 PE=1 SV=4			0	99	NPDDITQEEYGEFYK			-0.00171532	1846.79	924.401	1846.79	924.402	2	18	1.1.1.3398.5	1	85.2744	440.924	85.1945
4	47.22	47.22	30.39	27.9	26.24	sp|P08238|HS90B_HUMAN	Heat shock protein HSP 90-beta OS=Homo sapiens GN=HSP90AB1 PE=1 SV=4			0	99	NPDDITQEEYGEFYK			-0.00171532	1846.79	924.401	1846.79	924.402	2	16	1.1.1.3406.6	1	85.6037	484.691	85.7035
4	47.22	47.22	30.39	27.9	26.24	sp|P08238|HS90B_HUMAN	Heat shock protein HSP 90-beta OS=Homo sapiens GN=HSP90AB1 PE=1 SV=4			0	99	NPDDITQEEYGEFYK			0.00182471	1846.79	924.403	1846.79	924.402	2	18	1.1.1.3422.5	1	86.2708	1078.41	86.2876
4	47.22	47.22	30.39	27.9	26.24	sp|P08238|HS90B_HUMAN	Heat shock protein HSP 90-beta OS=Homo sapiens GN=HSP90AB1 PE=1 SV=4			0	99	NPDDITQEEYGEFYK			0.0014585	1846.79	924.403	1846.79	924.402	2	20	1.1.1.3431.3	1	86.6025	809.261	86.5784
4	47.22	47.22	30.39	27.9	26.24	sp|P08238|HS90B_HUMAN	Heat shock protein HSP 90-beta OS=Homo sapiens GN=HSP90AB1 PE=1 SV=4			0	99	NPDDITQEEYGEFYK			-0.00208153	1846.79	924.401	1846.79	924.402	2	16	1.1.1.3439.9	1	86.9241	1159.16	86.9879
4	47.22	47.22	30.39	27.9	26.24	sp|P08238|HS90B_HUMAN	Heat shock protein HSP 90-beta OS=Homo sapiens GN=HSP90AB1 PE=1 SV=4			0	99	NPDDITQEEYGEFYK			0.000726079	1846.79	924.403	1846.79	924.402	2	16	1.1.1.3447.16	1	87.2619	1086.08	87.5777
4	47.22	47.22	30.39	27.9	26.24	sp|P08238|HS90B_HUMAN	Heat shock protein HSP 90-beta OS=Homo sapiens GN=HSP90AB1 PE=1 SV=4			0	99	NPDDITQEEYGEFYK			0.000726079	1846.79	924.403	1846.79	924.402	2	12	1.1.1.3455.27	1	87.6034	1092.25	87.5777
4	47.22	47.22	30.39	27.9	26.24	sp|P08238|HS90B_HUMAN	Heat shock protein HSP 90-beta OS=Homo sapiens GN=HSP90AB1 PE=1 SV=4			0	99	NPDDITQEEYGEFYK			-0.00147118	1846.79	924.401	1846.79	924.402	2	12	1.1.1.3463.23	1	87.9402	1114.45	88.1302
4	47.22	47.22	30.39	27.9	26.24	sp|P08238|HS90B_HUMAN	Heat shock protein HSP 90-beta OS=Homo sapiens GN=HSP90AB1 PE=1 SV=4			0	99	NPDDITQEEYGEFYK			0.000848149	1846.79	924.403	1846.79	924.402	2	13	1.1.1.3479.18	1	88.6189	979.244	88.7683
4	47.22	47.22	30.39	27.9	26.24	sp|P08238|HS90B_HUMAN	Heat shock protein HSP 90-beta OS=Homo sapiens GN=HSP90AB1 PE=1 SV=4			0	99	NPDDITQEEYGEFYK			-0.00134911	1846.79	924.402	1846.79	924.402	2	14	1.1.1.3495.12	1	89.3017	980.046	89.4068
4	47.22	47.22	30.39	27.9	26.24	sp|P08238|HS90B_HUMAN	Heat shock protein HSP 90-beta OS=Homo sapiens GN=HSP90AB1 PE=1 SV=4			0	99	NPDDITQEEYGEFYK			-0.00256981	1846.79	924.401	1846.79	924.402	2	14	1.1.1.3503.13	1	89.6446	881.138	89.6622
4	47.22	47.22	30.39	27.9	26.24	sp|P08238|HS90B_HUMAN	Heat shock protein HSP 90-beta OS=Homo sapiens GN=HSP90AB1 PE=1 SV=4			0	99	NPDDITQEEYGEFYK			-0.00256981	1846.79	924.401	1846.79	924.402	2	14	1.1.1.3511.13	1	89.9873	881.138	89.6622
4	47.22	47.22	30.39	27.9	26.24	sp|P08238|HS90B_HUMAN	Heat shock protein HSP 90-beta OS=Homo sapiens GN=HSP90AB1 PE=1 SV=4			0	99	NPDDITQEEYGEFYK			0.0014585	1846.79	924.403	1846.79	924.402	2	15	1.1.1.3624.2	1	92.679	132.445	92.7696
4	47.22	47.22	30.39	27.9	26.24	sp|P08238|HS90B_HUMAN	Heat shock protein HSP 90-beta OS=Homo sapiens GN=HSP90AB1 PE=1 SV=4			0	99	NPDDITQEEYGEFYK			0.00463232	1846.79	924.404	1846.79	924.402	2	15	1.1.1.3635.2	1	93.002	161.512	92.9648
4	47.22	47.22	30.39	27.9	26.24	sp|P08238|HS90B_HUMAN	Heat shock protein HSP 90-beta OS=Homo sapiens GN=HSP90AB1 PE=1 SV=4			0	99	NPDDITQEEYGEFYK			0.00426611	1846.79	924.404	1846.79	924.402	2	16	1.1.1.3646.2	1	93.3583	141.657	93.2794
4	47.22	47.22	30.39	27.9	26.24	sp|P08238|HS90B_HUMAN	Heat shock protein HSP 90-beta OS=Homo sapiens GN=HSP90AB1 PE=1 SV=4			0	99	NPDDITQEEYGEFYK			0.00463232	1846.79	924.404	1846.79	924.402	2	17	1.1.1.3665.2	1	93.6898	128.165	93.6949
4	47.22	47.22	30.39	27.9	26.24	sp|P08238|HS90B_HUMAN	Heat shock protein HSP 90-beta OS=Homo sapiens GN=HSP90AB1 PE=1 SV=4			0	99	NPDDITQEEYGEFYK			0.00426611	1846.79	924.404	1846.79	924.402	2	17	1.1.1.3751.2	1	95.0692	109.778	95.1641
4	47.22	47.22	30.39	27.9	26.24	sp|P08238|HS90B_HUMAN	Heat shock protein HSP 90-beta OS=Homo sapiens GN=HSP90AB1 PE=1 SV=4			0	99	NPDDITQEEYGEFYK			0.00402197	1846.79	924.404	1846.79	924.402	2	13	1.1.1.3773.3	1	95.4048	117.921	95.32
4	47.22	47.22	30.39	27.9	26.24	sp|P08238|HS90B_HUMAN	Heat shock protein HSP 90-beta OS=Homo sapiens GN=HSP90AB1 PE=1 SV=4			0	99	NPDDITQEEYGEFYK			-0.00269188	1846.79	924.401	1846.79	924.402	2	15	1.1.1.3790.4	1	95.7195	337.395	95.9129
4	47.22	47.22	30.39	27.9	26.24	sp|P08238|HS90B_HUMAN	Heat shock protein HSP 90-beta OS=Homo sapiens GN=HSP90AB1 PE=1 SV=4			0	99	NPDDITQEEYGEFYK			-0.00110497	1846.79	924.402	1846.79	924.402	2	15	1.1.1.3798.4	1	96.0608	327.242	96.0407
4	47.22	47.22	30.39	27.9	26.24	sp|P08238|HS90B_HUMAN	Heat shock protein HSP 90-beta OS=Homo sapiens GN=HSP90AB1 PE=1 SV=4			0	99	NPDDITQEEYGEFYK			-0.00208153	1846.79	924.401	1846.79	924.402	2	15	1.1.1.3806.4	1	96.3741	276.823	96.3876
4	47.22	47.22	30.39	27.9	26.24	sp|P08238|HS90B_HUMAN	Heat shock protein HSP 90-beta OS=Homo sapiens GN=HSP90AB1 PE=1 SV=4			0	99	NPDDITQEEYGEFYK			0.00121436	1846.79	924.403	1846.79	924.402	2	19	1.1.1.3819.2	1	96.6828	185.81	96.6245
4	47.22	47.22	30.39	27.9	26.24	sp|P08238|HS90B_HUMAN	Heat shock protein HSP 90-beta OS=Homo sapiens GN=HSP90AB1 PE=1 SV=4			0	99	NPDDITQEEYGEFYK			0.00216305	1846.79	924.403	1846.79	924.402	2	14	1.1.1.2769.27	1	58.8476	5629.42	58.4002
4	47.22	47.22	30.39	27.9	26.24	sp|P08238|HS90B_HUMAN	Heat shock protein HSP 90-beta OS=Homo sapiens GN=HSP90AB1 PE=1 SV=4			0	99	NPDDITQEEYGEFYK			0.000316056	1846.79	924.402	1846.79	924.402	2	14	1.1.1.2785.13	1	59.5144	3006.93	59.285
4	47.22	47.22	30.39	27.9	26.24	sp|P08238|HS90B_HUMAN	Heat shock protein HSP 90-beta OS=Homo sapiens GN=HSP90AB1 PE=1 SV=4			0	99	NPDDITQEEYGEFYK			0.0050768	1846.79	924.405	1846.79	924.402	2	12	1.1.1.2911.25	1	64.8258	2032.79	64.7594
4	47.22	47.22	30.39	27.9	26.24	sp|P08238|HS90B_HUMAN	Heat shock protein HSP 90-beta OS=Homo sapiens GN=HSP90AB1 PE=1 SV=4			0	99	NPDDITQEEYGEFYK			0.0014585	1846.79	924.403	1846.79	924.402	2	14	1.1.1.3680.2	1	93.9961	131.612	94.1693
4	47.22	47.22	30.39	27.9	26.24	sp|P08238|HS90B_HUMAN	Heat shock protein HSP 90-beta OS=Homo sapiens GN=HSP90AB1 PE=1 SV=4			0	99	NPDDITQEEYGEFYK			0.00155269	1846.79	924.403	1846.79	924.402	2	12	1.1.1.2777.14	1	59.1734	4537.39	58.7377
4	47.22	47.22	30.39	27.9	26.24	sp|P08238|HS90B_HUMAN	Heat shock protein HSP 90-beta OS=Homo sapiens GN=HSP90AB1 PE=1 SV=4			0	99	NPDDITQEEYGEFYK			-0.00134911	1846.79	924.402	1846.79	924.402	2	12	1.1.1.3340.25	1	82.9775	2076.27	82.7833
4	47.22	47.22	30.39	27.9	26.24	sp|P08238|HS90B_HUMAN	Heat shock protein HSP 90-beta OS=Homo sapiens GN=HSP90AB1 PE=1 SV=4			0	99	NPDDITQEEYGEFYK			0.00170264	1846.79	924.403	1846.79	924.402	2	13	1.1.1.3414.11	1	85.938	1076.89	86.2468
4	47.22	47.22	30.39	27.9	26.24	sp|P08238|HS90B_HUMAN	Heat shock protein HSP 90-beta OS=Homo sapiens GN=HSP90AB1 PE=1 SV=4			0	99	NPDDITQEEYGEFYK			0.00191891	1846.79	924.403	1846.79	924.402	2	13	1.1.1.2737.21	1	57.4955	11340.9	57.0523
4	47.22	47.22	30.39	27.9	26.24	sp|P08238|HS90B_HUMAN	Heat shock protein HSP 90-beta OS=Homo sapiens GN=HSP90AB1 PE=1 SV=4			0	99	NPDDITQEEYGEFYK			7.19156e-05	1846.79	924.402	1846.79	924.402	2	13	1.1.1.2809.24	1	60.5178	4513.7	60.4953
4	47.22	47.22	30.39	27.9	26.24	sp|P08238|HS90B_HUMAN	Heat shock protein HSP 90-beta OS=Homo sapiens GN=HSP90AB1 PE=1 SV=4			0	99	NPDDITQEEYGEFYK			0.000848149	1846.79	924.403	1846.79	924.402	2	10	1.1.1.3487.19	1	88.9575	979.244	88.7683
4	47.22	47.22	30.39	27.9	26.24	sp|P08238|HS90B_HUMAN	Heat shock protein HSP 90-beta OS=Homo sapiens GN=HSP90AB1 PE=1 SV=4			0	99	NPDDITQEEYGEFYK			0.00129262	1846.79	924.403	1846.79	924.402	2	12	1.1.1.2833.25	1	61.53	3196.58	61.4216
4	47.22	47.22	30.39	27.9	26.24	sp|P08238|HS90B_HUMAN	Heat shock protein HSP 90-beta OS=Homo sapiens GN=HSP90AB1 PE=1 SV=4			0	99	NPDDITQEEYGEFYK			0.00060384	1846.79	924.403	1846.79	924.402	2	12	1.1.1.3009.18	1	68.9609	1893.73	68.9428
4	47.22	47.22	30.39	27.9	26.24	sp|P08238|HS90B_HUMAN	Heat shock protein HSP 90-beta OS=Homo sapiens GN=HSP90AB1 PE=1 SV=4			0	99	NPDDITQEEYGEFYK			0.00524267	1846.8	924.405	1846.79	924.402	2	10	1.1.1.3236.8	1	78.5629	1379.64	78.6377
4	47.22	47.22	30.39	27.9	26.24	sp|P08238|HS90B_HUMAN	Heat shock protein HSP 90-beta OS=Homo sapiens GN=HSP90AB1 PE=1 SV=4			0	99	NPDDITQEEYGEFYK			0.00451009	1846.79	924.404	1846.79	924.402	2	11	1.1.1.3072.17	1	71.6169	1552.06	71.642
4	47.22	47.22	30.39	27.9	26.24	sp|P08238|HS90B_HUMAN	Heat shock protein HSP 90-beta OS=Homo sapiens GN=HSP90AB1 PE=1 SV=4			0	99	NPDDITQEEYGEFYK			0.000926407	1846.79	924.403	1846.79	924.402	2	11	1.1.1.2841.25	1	61.8674	2964.28	61.6751
4	47.22	47.22	30.39	27.9	26.24	sp|P08238|HS90B_HUMAN	Heat shock protein HSP 90-beta OS=Homo sapiens GN=HSP90AB1 PE=1 SV=4			0	99	NPDDITQEEYGEFYK			0.00573095	1846.8	924.405	1846.79	924.402	2	10	1.1.1.3219.17	1	77.8594	1725.52	78.0529
4	47.22	47.22	30.39	27.9	26.24	sp|P08238|HS90B_HUMAN	Heat shock protein HSP 90-beta OS=Homo sapiens GN=HSP90AB1 PE=1 SV=4			0	99	NPDDITQEEYGEFYK			-0.00894537	1846.78	924.398	1846.79	924.402	2	12	1.1.1.2641.25	1	53.4636	4094.2	53.356
4	47.22	47.22	30.39	27.9	26.24	sp|P08238|HS90B_HUMAN	Heat shock protein HSP 90-beta OS=Homo sapiens GN=HSP90AB1 PE=1 SV=4			0	99	NPDDITQEEYGEFYK			-0.00171532	1846.79	924.401	1846.79	924.402	2	10	1.1.1.3519.15	1	90.3261	581.258	90.3854
4	47.22	47.22	30.39	27.9	26.24	sp|P08238|HS90B_HUMAN	Heat shock protein HSP 90-beta OS=Homo sapiens GN=HSP90AB1 PE=1 SV=4			0	99	NPDDITQEEYGEFYK			-0.00195946	1846.79	924.401	1846.79	924.402	2	10	1.1.1.3284.23	1	80.6001	1746.82	80.4494
4	47.22	47.22	30.39	27.9	26.24	sp|P08238|HS90B_HUMAN	Heat shock protein HSP 90-beta OS=Homo sapiens GN=HSP90AB1 PE=1 SV=4			0	99	NPDDITQEEYGEFYK			0.0081722	1846.8	924.406	1846.79	924.402	2	11	1.1.1.3001.17	1	68.6237	2053.29	68.6489
4	47.22	47.22	30.39	27.9	26.24	sp|P08238|HS90B_HUMAN	Heat shock protein HSP 90-beta OS=Homo sapiens GN=HSP90AB1 PE=1 SV=4			0	99	NPDDITQEEYGEFYK			0.00548681	1846.8	924.405	1846.79	924.402	2	8	1.1.1.3537.4	1	91.0622	145.762	91.0517
4	47.22	47.22	30.39	27.9	26.24	sp|P08238|HS90B_HUMAN	Heat shock protein HSP 90-beta OS=Homo sapiens GN=HSP90AB1 PE=1 SV=4			0	99	NPDDITQEEYGEFYK			7.19156e-05	1846.79	924.402	1846.79	924.402	2	11	1.1.1.2849.25	1	62.2038	2378.84	62.138
4	47.22	47.22	30.39	27.9	26.24	sp|P08238|HS90B_HUMAN	Heat shock protein HSP 90-beta OS=Homo sapiens GN=HSP90AB1 PE=1 SV=4			0	99	NPDDITQEEYGEFYK			0.00190297	1846.79	924.403	1846.79	924.402	2	12	1.1.1.2938.19	1	65.9624	2295.16	66.0697
4	47.22	47.22	30.39	27.9	26.24	sp|P08238|HS90B_HUMAN	Heat shock protein HSP 90-beta OS=Homo sapiens GN=HSP90AB1 PE=1 SV=4			0	99	NPDDITQEEYGEFYK			0.0017809	1846.79	924.403	1846.79	924.402	2	11	1.1.1.2928.23	1	65.5449	2676.77	65.4377
4	47.22	47.22	30.39	27.9	26.24	sp|P08238|HS90B_HUMAN	Heat shock protein HSP 90-beta OS=Homo sapiens GN=HSP90AB1 PE=1 SV=4			0	99	NPDDITQEEYGEFYK			0.00133626	1846.79	924.403	1846.79	924.402	2	10	1.1.1.3106.17	1	73.0595	1608.04	72.957
4	47.22	47.22	30.39	27.9	26.24	sp|P08238|HS90B_HUMAN	Heat shock protein HSP 90-beta OS=Homo sapiens GN=HSP90AB1 PE=1 SV=4			0	99	NPDDITQEEYGEFYK			0.00890462	1846.8	924.407	1846.79	924.402	2	11	1.1.1.2999.17	1	68.5399	1629.49	68.4392
4	47.22	47.22	30.39	27.9	26.24	sp|P08238|HS90B_HUMAN	Heat shock protein HSP 90-beta OS=Homo sapiens GN=HSP90AB1 PE=1 SV=4			0	99	NPDDITQEEYGEFYK			0.00129262	1846.79	924.403	1846.79	924.402	2	10	1.1.1.2956.21	1	66.7217	1521.63	66.701
4	47.22	47.22	30.39	27.9	26.24	sp|P08238|HS90B_HUMAN	Heat shock protein HSP 90-beta OS=Homo sapiens GN=HSP90AB1 PE=1 SV=4			0	99	NPDDITQEEYGEFYK			-0.00147118	1846.79	924.401	1846.79	924.402	2	10	1.1.1.3292.21	1	80.9394	1709.03	80.9185
4	47.22	47.22	30.39	27.9	26.24	sp|P08238|HS90B_HUMAN	Heat shock protein HSP 90-beta OS=Homo sapiens GN=HSP90AB1 PE=1 SV=4			0	99	NPDDITQEEYGEFYK			0.00719563	1846.8	924.406	1846.79	924.402	2	10	1.1.1.3081.21	1	72.0011	1801.55	72.0652
4	47.22	47.22	30.39	27.9	26.24	sp|P08238|HS90B_HUMAN	Heat shock protein HSP 90-beta OS=Homo sapiens GN=HSP90AB1 PE=1 SV=4			0	98.69	NPDDITQEEYGEFYK			-0.00147118	1846.79	924.401	1846.79	924.402	2	9	1.1.1.3471.16	1	88.2744	1114.45	88.1302
4	47.22	47.22	30.39	27.9	26.24	sp|P08238|HS90B_HUMAN	Heat shock protein HSP 90-beta OS=Homo sapiens GN=HSP90AB1 PE=1 SV=4			0	98.66	NPDDITQEEYGEFYK			0.00471058	1846.79	924.404	1846.79	924.402	2	9	1.1.1.2865.22	1	62.8772	1444.78	62.814
4	47.22	47.22	30.39	27.9	26.24	sp|P08238|HS90B_HUMAN	Heat shock protein HSP 90-beta OS=Homo sapiens GN=HSP90AB1 PE=1 SV=4			0	98.63	NPDDITQEEYGEFYK			0.0147363	1846.8	924.409	1846.79	924.402	2	11	1.1.1.2633.25	1	53.1276	3373.8	53.104
4	47.22	47.22	30.39	27.9	26.24	sp|P08238|HS90B_HUMAN	Heat shock protein HSP 90-beta OS=Homo sapiens GN=HSP90AB1 PE=1 SV=4			0	98.29	NPDDITQEEYGEFYK			0.000359699	1846.79	924.402	1846.79	924.402	2	9	1.1.1.3042.12	1	70.3567	1802.07	70.1766
4	47.22	47.22	30.39	27.9	26.24	sp|P08238|HS90B_HUMAN	Heat shock protein HSP 90-beta OS=Homo sapiens GN=HSP90AB1 PE=1 SV=4			0	97.8	NPDDITQEEYGEFYK			0.000682267	1846.79	924.403	1846.79	924.402	2	11	1.1.1.2873.17	1	63.2095	1793.66	63.1925
4	47.22	47.22	30.39	27.9	26.24	sp|P08238|HS90B_HUMAN	Heat shock protein HSP 90-beta OS=Homo sapiens GN=HSP90AB1 PE=1 SV=4			0	97.75	NPDDITQEEYGEFYK			0.00214711	1846.79	924.403	1846.79	924.402	2	11	1.1.1.2947.18	1	66.3384	1960.82	66.3208
4	47.22	47.22	30.39	27.9	26.24	sp|P08238|HS90B_HUMAN	Heat shock protein HSP 90-beta OS=Homo sapiens GN=HSP90AB1 PE=1 SV=4			0	97.63	NPDDITQEEYGEFYK			0.00568715	1846.8	924.405	1846.79	924.402	2	10	1.1.1.2981.20	1	67.7813	1791.78	67.6766
4	47.22	47.22	30.39	27.9	26.24	sp|P08238|HS90B_HUMAN	Heat shock protein HSP 90-beta OS=Homo sapiens GN=HSP90AB1 PE=1 SV=4			0	97.19	NPDDITQEEYGEFYK			-5.01546e-05	1846.79	924.402	1846.79	924.402	2	11	1.1.1.2825.21	1	61.1885	3704.92	61.1259
4	47.22	47.22	30.39	27.9	26.24	sp|P08238|HS90B_HUMAN	Heat shock protein HSP 90-beta OS=Homo sapiens GN=HSP90AB1 PE=1 SV=4			0	95.85	NPDDITQEEYGEFYK			0.0050768	1846.79	924.405	1846.79	924.402	2	11	1.1.1.2889.22	1	63.8913	1806.21	63.9123
4	47.22	47.22	30.39	27.9	26.24	sp|P08238|HS90B_HUMAN	Heat shock protein HSP 90-beta OS=Homo sapiens GN=HSP90AB1 PE=1 SV=4			0	91.74	NPDDITQEEYGEFYK			0.00719563	1846.8	924.406	1846.79	924.402	2	7	1.1.1.3084.22	1	72.1292	1801.55	72.0652
4	47.22	47.22	30.39	27.9	26.24	sp|P08238|HS90B_HUMAN	Heat shock protein HSP 90-beta OS=Homo sapiens GN=HSP90AB1 PE=1 SV=4			0	88.95	NPDDITQEEYGEFYK			0.00129262	1846.79	924.403	1846.79	924.402	2	8	1.1.1.2964.16	1	67.058	1707.8	66.8713
4	47.22	47.22	30.39	27.9	26.24	sp|P08238|HS90B_HUMAN	Heat shock protein HSP 90-beta OS=Homo sapiens GN=HSP90AB1 PE=1 SV=4			0	88.45	NPDDITQEEYGEFYK			-0.00346812	1846.79	924.4	1846.79	924.402	2	10	1.1.1.2881.22	1	63.5527	2243.7	63.616
4	47.22	47.22	30.39	27.9	26.24	sp|P08238|HS90B_HUMAN	Heat shock protein HSP 90-beta OS=Homo sapiens GN=HSP90AB1 PE=1 SV=4			0	87.93	NPDDITQEEYGEFYK			0.00251332	1846.79	924.403	1846.79	924.402	2	9	1.1.1.2919.24	1	65.1636	2682.65	65.1829
4	47.22	47.22	30.39	27.9	26.24	sp|P08238|HS90B_HUMAN	Heat shock protein HSP 90-beta OS=Homo sapiens GN=HSP90AB1 PE=1 SV=4			0	87.52	NPDDITQEEYGEFYK			0.00109229	1846.79	924.403	1846.79	924.402	2	7	1.1.1.3310.22	1	81.6964	1754.96	81.76
4	47.22	47.22	30.39	27.9	26.24	sp|P08238|HS90B_HUMAN	Heat shock protein HSP 90-beta OS=Homo sapiens GN=HSP90AB1 PE=1 SV=4			0	87.12	NPDDITQEEYGEFYK			7.19156e-05	1846.79	924.402	1846.79	924.402	2	8	1.1.1.2967.18	1	67.1873	1642.68	67.2541
4	47.22	47.22	30.39	27.9	26.24	sp|P08238|HS90B_HUMAN	Heat shock protein HSP 90-beta OS=Homo sapiens GN=HSP90AB1 PE=1 SV=4			0	86.75	NPDDITQEEYGEFYK			0.00585302	1846.8	924.405	1846.79	924.402	2	10	1.1.1.3244.6	1	78.9025	1466.35	79.0115
4	47.22	47.22	30.39	27.9	26.24	sp|P08238|HS90B_HUMAN	Heat shock protein HSP 90-beta OS=Homo sapiens GN=HSP90AB1 PE=1 SV=4			0	84.18	NPDDITQEEYGEFYK			0.00573095	1846.8	924.405	1846.79	924.402	2	7	1.1.1.3220.7	1	77.8936	1725.52	78.0529
4	47.22	47.22	30.39	27.9	26.24	sp|P08238|HS90B_HUMAN	Heat shock protein HSP 90-beta OS=Homo sapiens GN=HSP90AB1 PE=1 SV=4			0	83.99	NPDDITQEEYGEFYK			-0.00244792	1846.79	924.401	1846.79	924.402	2	8	1.1.1.3034.16	1	70.0237	1586.44	69.9644
4	47.22	47.22	30.39	27.9	26.24	sp|P08238|HS90B_HUMAN	Heat shock protein HSP 90-beta OS=Homo sapiens GN=HSP90AB1 PE=1 SV=4			0	79.96	NPDDITQEEYGEFYK			0.00328939	1846.79	924.404	1846.79	924.402	2	7	1.1.1.3210.9	1	77.4708	1064.53	77.4177
4	47.22	47.22	30.39	27.9	26.24	sp|P08238|HS90B_HUMAN	Heat shock protein HSP 90-beta OS=Homo sapiens GN=HSP90AB1 PE=1 SV=4			0	77.56	NPDDITQEEYGEFYK			0.0073177	1846.8	924.406	1846.79	924.402	2	8	1.1.1.3202.21	1	77.1413	1307.93	76.9518
4	47.22	47.22	30.39	27.9	26.24	sp|P08238|HS90B_HUMAN	Heat shock protein HSP 90-beta OS=Homo sapiens GN=HSP90AB1 PE=1 SV=4			0	62.6	NPDDITQEEYGEFYK			0.00129262	1846.79	924.403	1846.79	924.402	2	7	1.1.1.2975.11	1	67.5198	1698.57	67.5078
4	47.22	47.22	30.39	27.9	26.24	sp|P08238|HS90B_HUMAN	Heat shock protein HSP 90-beta OS=Homo sapiens GN=HSP90AB1 PE=1 SV=4			0	55.52	NPDDITQEEYGEFYK			0.000682267	1846.79	924.403	1846.79	924.402	2	9	1.1.1.2893.20	1	64.0592	2520.44	64.2089
4	47.22	47.22	30.39	27.9	26.24	sp|P08238|HS90B_HUMAN	Heat shock protein HSP 90-beta OS=Homo sapiens GN=HSP90AB1 PE=1 SV=4			0	26.63	NPDDITQEEYGEFYK			0.000970051	1846.79	924.403	1846.79	924.402	2	7	1.1.1.3017.18	1	69.3014	1810.91	69.2832
4	47.22	47.22	30.39	27.9	26.24	sp|P08238|HS90B_HUMAN	Heat shock protein HSP 90-beta OS=Homo sapiens GN=HSP90AB1 PE=1 SV=4			0	22.95	NPDDITQEEYGEFYK			0.00585302	1846.8	924.405	1846.79	924.402	2	7	1.1.1.3244.5	1	78.9	1466.35	79.0115
4	47.22	47.22	30.39	27.9	26.24	sp|P08238|HS90B_HUMAN	Heat shock protein HSP 90-beta OS=Homo sapiens GN=HSP90AB1 PE=1 SV=4			0	18.39	NPDDITQEEYGEFYK			0.000359699	1846.79	924.402	1846.79	924.402	2	7	1.1.1.3095.14	1	72.5894	1699.63	72.617
4	47.22	47.22	30.39	27.9	26.24	sp|P08238|HS90B_HUMAN	Heat shock protein HSP 90-beta OS=Homo sapiens GN=HSP90AB1 PE=1 SV=4			0	17.75	NPDDITQEEYGEFYK			0.00117055	1846.79	924.403	1846.79	924.402	2	8	1.1.1.2902.18	1	64.439	2694.17	64.4209
4	47.22	47.22	30.39	27.9	26.24	sp|P08238|HS90B_HUMAN	Heat shock protein HSP 90-beta OS=Homo sapiens GN=HSP90AB1 PE=1 SV=4			0	99	YESLTDPSK			-0.00032037	1038.49	520.251	1038.49	520.251	2	10	1.1.1.1923.3	0	23.3261	8605.24	23.3629
4	47.22	47.22	30.39	27.9	26.24	sp|P08238|HS90B_HUMAN	Heat shock protein HSP 90-beta OS=Homo sapiens GN=HSP90AB1 PE=1 SV=4			0	99	YESLTDPSKLDSGK		missed K-L@9	0.00340925	1538.75	513.924	1538.75	513.923	3	10	1.1.1.2190.4	0	34.4847	28531.9	34.7307
4	47.22	47.22	30.39	27.9	26.24	sp|P08238|HS90B_HUMAN	Heat shock protein HSP 90-beta OS=Homo sapiens GN=HSP90AB1 PE=1 SV=4			0	99	YESLTDPSKLDSGK		missed K-L@9	0.00340925	1538.75	513.924	1538.75	513.923	3	11	1.1.1.2198.5	0	34.8217	28531.9	34.7307
4	47.22	47.22	30.39	27.9	26.24	sp|P08238|HS90B_HUMAN	Heat shock protein HSP 90-beta OS=Homo sapiens GN=HSP90AB1 PE=1 SV=4			0	99	YHTSQSGDEMTSLSEYVSR			9.09052e-05	2175.94	726.32	2175.94	726.32	3	12	1.1.1.2606.9	1	51.9785	7039.2	51.7571
4	47.22	47.22	30.39	27.9	26.24	sp|P08238|HS90B_HUMAN	Heat shock protein HSP 90-beta OS=Homo sapiens GN=HSP90AB1 PE=1 SV=4			0	93.51	YIDQEELNK			-0.0014623	1150.55	576.282	1150.55	576.283	2	9	1.1.1.2015.11	0	27.1736	5987.65	26.7481
4	47.22	47.22	30.39	27.9	26.24	sp|P08238|HS90B_HUMAN	Heat shock protein HSP 90-beta OS=Homo sapiens GN=HSP90AB1 PE=1 SV=4			0	93.2	YIDQEELNK			-0.000851944	1150.55	576.282	1150.55	576.283	2	9	1.1.1.2007.7	0	26.8391	41399.6	26.4149
4	47.22	47.22	30.39	27.9	26.24	sp|P08238|HS90B_HUMAN	Heat shock protein HSP 90-beta OS=Homo sapiens GN=HSP90AB1 PE=1 SV=4			0	92.37	YIDQEELNK			0.000979113	1150.55	576.283	1150.55	576.283	2	10	1.1.1.1983.7	0	25.84	156109	26.1644
4	47.22	47.22	30.39	27.9	26.24	sp|P08238|HS90B_HUMAN	Heat shock protein HSP 90-beta OS=Homo sapiens GN=HSP90AB1 PE=1 SV=4			0	91.71	YIDQEELNK			0.000979113	1150.55	576.283	1150.55	576.283	2	10	1.1.1.1999.11	0	26.5101	156943	26.1644
5	41.78	41.78	21.8	11.19	9.084	sp|Q9UQ35|SRRM2_HUMAN	Serine/arginine repetitive matrix protein 2 OS=Homo sapiens GN=SRRM2 PE=1 SV=2			2	99	AGMSSNQSISSPVLDAVPR	Phospho(S)@11		-0.00268324	1994.91	998.463	1994.91	998.464	2	17	1.1.1.2833.32	1	61.5358	9480.16	61.6751
5	41.78	41.78	21.8	11.19	9.084	sp|Q9UQ35|SRRM2_HUMAN	Serine/arginine repetitive matrix protein 2 OS=Homo sapiens GN=SRRM2 PE=1 SV=2			2	99	AQTPPGPSLSGSK	Phospho(T)@3		-0.00306887	1305.59	653.804	1305.6	653.806	2	13	1.1.1.1971.14	1	25.3534	11881.4	25.1651
5	41.78	41.78	21.8	11.19	9.084	sp|Q9UQ35|SRRM2_HUMAN	Serine/arginine repetitive matrix protein 2 OS=Homo sapiens GN=SRRM2 PE=1 SV=2			2	99	EDLNGPFLNQLETDPSLDMK	Deamidated(N)@4		0.00180397	2276.05	1139.03	2276.05	1139.03	2	18	1.1.1.3150.30	1	74.9388	20370.7	74.9104
5	41.78	41.78	21.8	11.19	9.084	sp|Q9UQ35|SRRM2_HUMAN	Serine/arginine repetitive matrix protein 2 OS=Homo sapiens GN=SRRM2 PE=1 SV=2			2	99	ENSFGSPLEFR	Phospho(S)@6		-0.00144433	1361.56	681.789	1361.57	681.79	2	10	1.1.1.2849.5	1	62.1871	7926.38	61.8437
5	41.78	41.78	21.8	11.19	9.084	sp|Q9UQ35|SRRM2_HUMAN	Serine/arginine repetitive matrix protein 2 OS=Homo sapiens GN=SRRM2 PE=1 SV=2			2	99	GEFSASPMLK	Phospho(S)@6		-0.000716708	1145.48	573.748	1145.48	573.749	2	11	1.1.1.2561.4	1	50.0724	11696.2	50.0243
5	41.78	41.78	21.8	11.19	9.084	sp|Q9UQ35|SRRM2_HUMAN	Serine/arginine repetitive matrix protein 2 OS=Homo sapiens GN=SRRM2 PE=1 SV=2			2	99	MALPPQEDATASPPR	Phospho(S)@12		0.00167262	1659.73	830.875	1659.73	830.874	2	17	1.1.1.2335.29	1	40.6001	6454.47	40.362
5	41.78	41.78	21.8	11.19	9.084	sp|Q9UQ35|SRRM2_HUMAN	Serine/arginine repetitive matrix protein 2 OS=Homo sapiens GN=SRRM2 PE=1 SV=2			2	99	MAPALSGANLTSPR	Phospho(S)@12		-0.00194679	1464.68	733.346	1464.68	733.347	2	16	1.1.1.2455.22	1	45.6333	8092.44	45.3609
5	41.78	41.78	21.8	11.19	9.084	sp|Q9UQ35|SRRM2_HUMAN	Serine/arginine repetitive matrix protein 2 OS=Homo sapiens GN=SRRM2 PE=1 SV=2			2	99	QSHSGSISPYPK	Gln->pyro-Glu@N-term; Phospho(S)@8		-0.00113917	1349.56	675.789	1349.57	675.79	2	16	1.1.1.2026.22	1	27.6399	10257.6	27.7867
5	41.78	41.78	21.8	11.19	9.084	sp|Q9UQ35|SRRM2_HUMAN	Serine/arginine repetitive matrix protein 2 OS=Homo sapiens GN=SRRM2 PE=1 SV=2			2	99	SCFESSPDPELK	Carbamidomethyl(C)@2; Phospho(S)@6		-0.000178761	1474.57	738.292	1474.57	738.292	2	13	1.1.1.2305.23	1	39.329	33719.7	39.4757
5	41.78	41.78	21.8	11.19	9.084	sp|Q9UQ35|SRRM2_HUMAN	Serine/arginine repetitive matrix protein 2 OS=Homo sapiens GN=SRRM2 PE=1 SV=2			2	99	SPGMLEPLGSSR	Phospho(S)@1		0.0027224	1309.58	655.795	1309.57	655.794	2	15	1.1.1.2548.10	1	49.5329	8457.4	49.6475
5	41.78	41.78	21.8	11.19	9.084	sp|Q9UQ35|SRRM2_HUMAN	Serine/arginine repetitive matrix protein 2 OS=Homo sapiens GN=SRRM2 PE=1 SV=2			2	99	SPVPSAFSDQSR	Phospho(S)@1		-0.000800992	1356.57	679.292	1356.57	679.293	2	10	1.1.1.2229.11	1	36.133	2658.29	36.1631
5	41.78	41.78	21.8	11.19	9.084	sp|Q9UQ35|SRRM2_HUMAN	Serine/arginine repetitive matrix protein 2 OS=Homo sapiens GN=SRRM2 PE=1 SV=2			2	99	SRSPLAIR	Phospho(S)@1; Phospho(S)@3	missed R-S@2	-0.00123429	1058.47	530.24	1058.47	530.241	2	11	1.1.1.2064.3	1	29.2047	4678.19	28.785
5	41.78	41.78	21.8	11.19	9.084	sp|Q9UQ35|SRRM2_HUMAN	Serine/arginine repetitive matrix protein 2 OS=Homo sapiens GN=SRRM2 PE=1 SV=2			2	99	SSGHSSSELSPDAVEK	Phospho(S)@10		0.00147588	1695.7	848.857	1695.7	848.857	2	20	1.1.1.1961.30	1	24.9416	3401.55	24.997
5	41.78	41.78	21.8	11.19	9.084	sp|Q9UQ35|SRRM2_HUMAN	Serine/arginine repetitive matrix protein 2 OS=Homo sapiens GN=SRRM2 PE=1 SV=2			2	99	SSTPPGESYFGVSSLQLK	Phospho(T)@3		-0.00074274	1962.9	982.456	1962.9	982.456	2	16	1.1.1.3112.26	1	73.3217	30587.6	73.1695
5	41.78	41.78	21.8	11.19	9.084	sp|Q9UQ35|SRRM2_HUMAN	Serine/arginine repetitive matrix protein 2 OS=Homo sapiens GN=SRRM2 PE=1 SV=2			2	99	THTTALAGRSPSPASGR	Phospho(T)@1; Phospho(S)@12	missed R-S@9	0.00192803	1825.79	609.604	1825.79	609.603	3	13	1.1.1.1755.11	1	16.3107	27509.3	16.2151
5	41.78	41.78	21.8	11.19	9.084	sp|Q9UQ35|SRRM2_HUMAN	Serine/arginine repetitive matrix protein 2 OS=Homo sapiens GN=SRRM2 PE=1 SV=2			1.95861	98.96	CRSPGMLEPLGSSR	Carbamidomethyl(C)@1; Phospho(S)@3	missed R-S@2	-0.00141065	1625.7	542.909	1625.71	542.909	3	8	1.1.1.2334.4	1	40.5371	2558.34	40.4887
5	41.78	41.78	21.8	11.19	9.084	sp|Q9UQ35|SRRM2_HUMAN	Serine/arginine repetitive matrix protein 2 OS=Homo sapiens GN=SRRM2 PE=1 SV=2			1.82391	99	ELSNSPLRENSFGSPLEFR	Phospho(S)@3; Deamidated(N)@10	missed R-E@8	0.00381817	2259.02	754.015	2259.02	754.014	3	12	1.1.1.3000.6	1	68.5726	2899.65	68.3547
5	41.78	41.78	21.8	11.19	9.084	sp|Q9UQ35|SRRM2_HUMAN	Serine/arginine repetitive matrix protein 2 OS=Homo sapiens GN=SRRM2 PE=1 SV=2			1.46852	99	TPAAAAAMNLASPR	Deamidated(N)@9; Phospho(S)@12		-0.0149019	1421.62	711.818	1421.64	711.826	2	10	1.1.1.2390.12	1	42.8926	12852.5	43.3002
5	41.78	41.78	21.8	11.19	9.084	sp|Q9UQ35|SRRM2_HUMAN	Serine/arginine repetitive matrix protein 2 OS=Homo sapiens GN=SRRM2 PE=1 SV=2			1.35655	95.74	SSTGPEPPAPTPLLAER			-0.00204119	1718.88	860.448	1718.88	860.449	2	8	1.1.1.2487.21	1	46.9769	1218.52	47.0828
5	41.78	41.78	21.8	11.19	9.084	sp|Q9UQ35|SRRM2_HUMAN	Serine/arginine repetitive matrix protein 2 OS=Homo sapiens GN=SRRM2 PE=1 SV=2			1.25964	94.66	EQNSALPTSSQDEELMEVVEK			0.001388	2362.09	1182.05	2362.08	1182.05	2	11	1.1.1.2996.36	1	68.4299	6574.58	68.4392
5	41.78	41.78	21.8	11.19	9.084	sp|Q9UQ35|SRRM2_HUMAN	Serine/arginine repetitive matrix protein 2 OS=Homo sapiens GN=SRRM2 PE=1 SV=2			1.21467	94.16	VSGRTSPPLLDR	Phospho(T)@5	missed R-T@4	0.00229157	1376.68	459.902	1376.68	459.901	3	7	1.1.1.2079.6	1	29.8325	7263.73	29.8668
5	41.78	41.78	21.8	11.19	9.084	sp|Q9UQ35|SRRM2_HUMAN	Serine/arginine repetitive matrix protein 2 OS=Homo sapiens GN=SRRM2 PE=1 SV=2			0.89279	94.55	SRTSPAPWKR	Phospho(S)@1; Phospho(S)@4	missed R-T@2; missed K-R@9	-0.000643409	1344.57	673.294	1344.57	673.294	2	8	1.1.1.1884.15	1	21.7069	3073.56	21.8588
5	41.78	41.78	21.8	11.19	9.084	sp|Q9UQ35|SRRM2_HUMAN	Serine/arginine repetitive matrix protein 2 OS=Homo sapiens GN=SRRM2 PE=1 SV=2			0.446117	82.04	SRTPLLPR	Phospho(S)@1; Phospho(T)@3	missed R-T@2	-0.000846423	1098.5	550.256	1098.5	550.257	2	10	1.1.1.2171.6	1	33.6933	15488.3	33.6859
5	41.78	41.78	21.8	11.19	9.084	sp|Q9UQ35|SRRM2_HUMAN	Serine/arginine repetitive matrix protein 2 OS=Homo sapiens GN=SRRM2 PE=1 SV=2			0.353596	56.58	TSPPLLDR	Phospho(S)@2		0.000325542	977.459	489.737	977.458	489.736	2	6	1.1.1.2216.5	1	35.5808	10967.6	35.1518
5	41.78	41.78	21.8	11.19	9.084	sp|Q9UQ35|SRRM2_HUMAN	Serine/arginine repetitive matrix protein 2 OS=Homo sapiens GN=SRRM2 PE=1 SV=2			0.276544	69.33	AQTPPGPSLSGSKSPCPQEK	Phospho(S)@8; Phospho(S)@14; Carbamidomethyl(C)@16	missed K-S@13	0.00303038	2211.93	738.317	2211.93	738.316	3	10	1.1.1.2052.20	1	28.7252	5816.73	28.9925
5	41.78	41.78	21.8	11.19	9.084	sp|Q9UQ35|SRRM2_HUMAN	Serine/arginine repetitive matrix protein 2 OS=Homo sapiens GN=SRRM2 PE=1 SV=2			0.197226	37.38	SLSYSPVER	Phospho(S)@3		0.00738608	1116.49	559.254	1116.49	559.25	2	5	1.1.1.2243.8	1	36.7171	745.165	36.6654
5	41.78	41.78	21.8	11.19	9.084	sp|Q9UQ35|SRRM2_HUMAN	Serine/arginine repetitive matrix protein 2 OS=Homo sapiens GN=SRRM2 PE=1 SV=2			0.154902	30.75	SSSPVTELASR	Phospho(S)@3		-0.0142329	1212.52	607.269	1212.54	607.277	2	7	1.1.1.2226.13	1	36.0088	40441.4	36.4136
5	41.78	41.78	21.8	11.19	9.084	sp|Q9UQ35|SRRM2_HUMAN	Serine/arginine repetitive matrix protein 2 OS=Homo sapiens GN=SRRM2 PE=1 SV=2			0.129011	26.42	QPSSPYEDKDKDK		missed K-D@9; missed K-D@11	-0.00177157	1535.71	768.862	1535.71	768.862	2	8	1.1.1.2395.21	0	43.1104	8932.44	42.9219
5	41.78	41.78	21.8	11.19	9.084	sp|Q9UQ35|SRRM2_HUMAN	Serine/arginine repetitive matrix protein 2 OS=Homo sapiens GN=SRRM2 PE=1 SV=2			0.0501223	23.72	SRTPPVTR	Phospho(S)@1; Phospho(T)@3	missed R-T@2	-0.000431368	1072.45	537.231	1072.45	537.231	2	6	1.1.1.1642.3	1	11.7796	256.011	11.931
5	41.78	41.78	21.8	11.19	9.084	sp|Q9UQ35|SRRM2_HUMAN	Serine/arginine repetitive matrix protein 2 OS=Homo sapiens GN=SRRM2 PE=1 SV=2			0.0447935	32.32	NSGPLGTEMNTGFSSEVK	Deamidated(N)@1		0.00514675	1854.84	928.425	1854.83	928.423	2	9	1.1.1.2803.16	1	60.2682	1003.72	60.2866
5	41.78	41.78	21.8	11.19	9.084	sp|Q9UQ35|SRRM2_HUMAN	Serine/arginine repetitive matrix protein 2 OS=Homo sapiens GN=SRRM2 PE=1 SV=2			0.0315171	16.05	SRTPPSAPSQSR	Phospho(S)@1; Phospho(T)@3	missed R-T@2	-0.00237737	1429.57	715.794	1429.58	715.795	2	8	1.1.1.1701.21	1	14.0738	1919.77	13.9698
5	41.78	41.78	21.8	11.19	9.084	sp|Q9UQ35|SRRM2_HUMAN	Serine/arginine repetitive matrix protein 2 OS=Homo sapiens GN=SRRM2 PE=1 SV=2			0.0310503	15.76	SLTRSPPAIR	Phospho(T)@3; Phospho(S)@5	missed R-S@4	0.00794121	1256.58	629.295	1256.57	629.291	2	6	1.1.1.2147.18	1	32.695	1009.8	32.7193
5	41.78	41.78	21.8	11.19	9.084	sp|Q9UQ35|SRRM2_HUMAN	Serine/arginine repetitive matrix protein 2 OS=Homo sapiens GN=SRRM2 PE=1 SV=2			0	99	AGMSSNQSISSPVLDAVPR	Phospho(S)@11		-0.00268324	1994.91	998.463	1994.91	998.464	2	17	1.1.1.2841.30	1	61.8716	9480.16	61.6751
5	41.78	41.78	21.8	11.19	9.084	sp|Q9UQ35|SRRM2_HUMAN	Serine/arginine repetitive matrix protein 2 OS=Homo sapiens GN=SRRM2 PE=1 SV=2			0	99	AGMSSNQSISSPVLDAVPR	Phospho(S)@11		-0.00268324	1994.91	998.463	1994.91	998.464	2	14	1.1.1.2840.25	1	61.8253	9480.16	61.6751
5	41.78	41.78	21.8	11.19	9.084	sp|Q9UQ35|SRRM2_HUMAN	Serine/arginine repetitive matrix protein 2 OS=Homo sapiens GN=SRRM2 PE=1 SV=2			0	99	AGMSSNQSISSPVLDAVPR	Phospho(S)@11		-0.00268324	1994.91	998.463	1994.91	998.464	2	13	1.1.1.2832.27	1	61.4893	9480.16	61.6751
5	41.78	41.78	21.8	11.19	9.084	sp|Q9UQ35|SRRM2_HUMAN	Serine/arginine repetitive matrix protein 2 OS=Homo sapiens GN=SRRM2 PE=1 SV=2			0	99	AGMSSNQSISSPVLDAVPR	Phospho(S)@11		-0.00231703	1994.91	998.463	1994.91	998.464	2	12	1.1.1.2850.24	1	62.2451	7880.06	61.8016
5	41.78	41.78	21.8	11.19	9.084	sp|Q9UQ35|SRRM2_HUMAN	Serine/arginine repetitive matrix protein 2 OS=Homo sapiens GN=SRRM2 PE=1 SV=2			0	99	AGMSSNQSISSPVLDAVPR	Phospho(S)@11		0.000490589	1994.91	998.464	1994.91	998.464	2	12	1.1.1.2825.28	1	61.1943	8080.24	61.5906
5	41.78	41.78	21.8	11.19	9.084	sp|Q9UQ35|SRRM2_HUMAN	Serine/arginine repetitive matrix protein 2 OS=Homo sapiens GN=SRRM2 PE=1 SV=2			0	98.6	AGMSSNQSISSPVLDAVPR	Phospho(S)@11		-0.00304945	1994.91	998.462	1994.91	998.464	2	12	1.1.1.2848.29	1	62.1649	9278.04	61.7172
5	41.78	41.78	21.8	11.19	9.084	sp|Q9UQ35|SRRM2_HUMAN	Serine/arginine repetitive matrix protein 2 OS=Homo sapiens GN=SRRM2 PE=1 SV=2			0	65.85	AQTPPGPSLSGSK	Phospho(T)@3		-0.00428957	1305.59	653.803	1305.6	653.806	2	8	1.1.1.1955.21	1	24.6811	3315.21	24.7449
5	41.78	41.78	21.8	11.19	9.084	sp|Q9UQ35|SRRM2_HUMAN	Serine/arginine repetitive matrix protein 2 OS=Homo sapiens GN=SRRM2 PE=1 SV=2			0	26.67	AQTPPGPSLSGSKSPCPQEK	Phospho(S)@14; Carbamidomethyl(C)@16	missed K-S@13	-0.00111963	2131.96	711.66	2131.96	711.661	3	9	1.1.1.1973.17	1	25.4314	3380.7	25.415
5	41.78	41.78	21.8	11.19	9.084	sp|Q9UQ35|SRRM2_HUMAN	Serine/arginine repetitive matrix protein 2 OS=Homo sapiens GN=SRRM2 PE=1 SV=2			0	79.06	CRSPGMLEPLGSSR	Carbamidomethyl(C)@1; Phospho(S)@3	missed R-S@2	0.00247575	1625.71	813.861	1625.71	813.86	2	8	1.1.1.2326.23	1	40.2154	3213.47	40.4465
5	41.78	41.78	21.8	11.19	9.084	sp|Q9UQ35|SRRM2_HUMAN	Serine/arginine repetitive matrix protein 2 OS=Homo sapiens GN=SRRM2 PE=1 SV=2			0	75.59	CRSPGMLEPLGSSR	Carbamidomethyl(C)@1; Phospho(S)@3	missed R-S@2	0.00247575	1625.71	813.861	1625.71	813.86	2	10	1.1.1.2335.26	1	40.5976	3213.47	40.4465
5	41.78	41.78	21.8	11.19	9.084	sp|Q9UQ35|SRRM2_HUMAN	Serine/arginine repetitive matrix protein 2 OS=Homo sapiens GN=SRRM2 PE=1 SV=2			0	98.55	EDLNGPFLNQLETDPSLDMK	Deamidated(N)@4		0.00131569	2276.05	1139.03	2276.05	1139.03	2	12	1.1.1.3166.31	1	75.6199	5758.81	75.4217
5	41.78	41.78	21.8	11.19	9.084	sp|Q9UQ35|SRRM2_HUMAN	Serine/arginine repetitive matrix protein 2 OS=Homo sapiens GN=SRRM2 PE=1 SV=2			0	42.07	EDLNGPFLNQLETDPSLDMK			-0.00221698	2275.07	1138.54	2275.07	1138.54	2	8	1.1.1.3141.31	1	74.5569	6001.94	74.7829
5	41.78	41.78	21.8	11.19	9.084	sp|Q9UQ35|SRRM2_HUMAN	Serine/arginine repetitive matrix protein 2 OS=Homo sapiens GN=SRRM2 PE=1 SV=2			0	99	ELSNSPLRENSFGSPLEFR	Phospho(S)@3; Deamidated(N)@10	missed R-E@8	0.00345196	2259.02	754.015	2259.02	754.014	3	10	1.1.1.3022.5	1	69.5032	1376.23	69.6661
5	41.78	41.78	21.8	11.19	9.084	sp|Q9UQ35|SRRM2_HUMAN	Serine/arginine repetitive matrix protein 2 OS=Homo sapiens GN=SRRM2 PE=1 SV=2			0	93.07	ELSNSPLRENSFGSPLEFR	Phospho(S)@5; Deamidated(N)@10	missed R-E@8	0.0224261	2259.04	754.022	2259.02	754.014	3	10	1.1.1.2977.6	1	67.6	3973.09	67.5499
5	41.78	41.78	21.8	11.19	9.084	sp|Q9UQ35|SRRM2_HUMAN	Serine/arginine repetitive matrix protein 2 OS=Homo sapiens GN=SRRM2 PE=1 SV=2			0	80.87	ELSNSPLRENSFGSPLEFR	Phospho(S)@3; Phospho(S)@14	missed R-E@8	0.00821911	2338.01	780.344	2338	780.342	3	7	1.1.1.3056.5	1	70.9363	1801.34	71.0969
5	41.78	41.78	21.8	11.19	9.084	sp|Q9UQ35|SRRM2_HUMAN	Serine/arginine repetitive matrix protein 2 OS=Homo sapiens GN=SRRM2 PE=1 SV=2			0	70.87	ELSNSPLRENSFGSPLEFR	Phospho(S)@5	missed R-E@8	0.00284108	2258.04	753.687	2258.04	753.686	3	10	1.1.1.2978.9	1	67.6448	9310.02	67.5499
5	41.78	41.78	21.8	11.19	9.084	sp|Q9UQ35|SRRM2_HUMAN	Serine/arginine repetitive matrix protein 2 OS=Homo sapiens GN=SRRM2 PE=1 SV=2			0	99	ENSFGSPLEFR	Deamidated(N)@2; Phospho(S)@6		0.00160026	1362.55	682.283	1362.55	682.282	2	9	1.1.1.2890.3	1	63.9178	1753.62	64.2514
5	41.78	41.78	21.8	11.19	9.084	sp|Q9UQ35|SRRM2_HUMAN	Serine/arginine repetitive matrix protein 2 OS=Homo sapiens GN=SRRM2 PE=1 SV=2			0	99	ENSFGSPLEFR	Phospho(S)@6		-0.00144433	1361.56	681.789	1361.57	681.79	2	12	1.1.1.2841.6	1	61.8516	7926.38	61.8437
5	41.78	41.78	21.8	11.19	9.084	sp|Q9UQ35|SRRM2_HUMAN	Serine/arginine repetitive matrix protein 2 OS=Homo sapiens GN=SRRM2 PE=1 SV=2			0	98.66	ENSFGSPLEFR	Deamidated(N)@2; Phospho(S)@6		0.00196647	1362.55	682.283	1362.55	682.282	2	10	1.1.1.2898.4	1	64.2578	1908.88	64.2937
5	41.78	41.78	21.8	11.19	9.084	sp|Q9UQ35|SRRM2_HUMAN	Serine/arginine repetitive matrix protein 2 OS=Homo sapiens GN=SRRM2 PE=1 SV=2			0	95.85	ENSFGSPLEFR	Deamidated(N)@2; Phospho(S)@6		0.000623697	1362.55	682.282	1362.55	682.282	2	9	1.1.1.2906.4	1	64.5966	2117.4	64.5056
5	41.78	41.78	21.8	11.19	9.084	sp|Q9UQ35|SRRM2_HUMAN	Serine/arginine repetitive matrix protein 2 OS=Homo sapiens GN=SRRM2 PE=1 SV=2			0	88.95	ENSFGSPLEFR	Phospho(S)@6		-0.00144433	1361.56	681.789	1361.57	681.79	2	8	1.1.1.2833.3	1	61.5116	7789.7	61.8437
5	41.78	41.78	21.8	11.19	9.084	sp|Q9UQ35|SRRM2_HUMAN	Serine/arginine repetitive matrix protein 2 OS=Homo sapiens GN=SRRM2 PE=1 SV=2			0	99	GEFSASPMLK	Phospho(S)@6		-0.000664719	1145.48	573.748	1145.48	573.749	2	9	1.1.1.2577.4	1	50.7478	9788.43	50.3195
5	41.78	41.78	21.8	11.19	9.084	sp|Q9UQ35|SRRM2_HUMAN	Serine/arginine repetitive matrix protein 2 OS=Homo sapiens GN=SRRM2 PE=1 SV=2			0	99	GEFSASPMLK	Phospho(S)@6		-0.000472567	1145.48	573.749	1145.48	573.749	2	10	1.1.1.2569.6	1	50.412	11857.8	50.1927
5	41.78	41.78	21.8	11.19	9.084	sp|Q9UQ35|SRRM2_HUMAN	Serine/arginine repetitive matrix protein 2 OS=Homo sapiens GN=SRRM2 PE=1 SV=2			0	95.03	GEFSASPMLK	Phospho(S)@6		-0.000716708	1145.48	573.748	1145.48	573.749	2	9	1.1.1.2553.4	1	49.7372	11696.2	50.0243
5	41.78	41.78	21.8	11.19	9.084	sp|Q9UQ35|SRRM2_HUMAN	Serine/arginine repetitive matrix protein 2 OS=Homo sapiens GN=SRRM2 PE=1 SV=2			0	99	MALPPQEDATASPPR	Phospho(S)@12		0.00472438	1659.74	830.876	1659.73	830.874	2	14	1.1.1.2343.28	1	40.9352	4609.08	40.7837
5	41.78	41.78	21.8	11.19	9.084	sp|Q9UQ35|SRRM2_HUMAN	Serine/arginine repetitive matrix protein 2 OS=Homo sapiens GN=SRRM2 PE=1 SV=2			0	99	MALPPQEDATASPPR	Phospho(S)@12		0.00260112	1659.74	830.875	1659.73	830.874	2	12	1.1.1.2414.23	1	43.9104	2193.1	44.0567
5	41.78	41.78	21.8	11.19	9.084	sp|Q9UQ35|SRRM2_HUMAN	Serine/arginine repetitive matrix protein 2 OS=Homo sapiens GN=SRRM2 PE=1 SV=2			0	99	MALPPQEDATASPPR	Phospho(S)@12		-0.00069479	1659.73	830.873	1659.73	830.874	2	11	1.1.1.2423.26	1	44.2922	2316.7	44.1832
5	41.78	41.78	21.8	11.19	9.084	sp|Q9UQ35|SRRM2_HUMAN	Serine/arginine repetitive matrix protein 2 OS=Homo sapiens GN=SRRM2 PE=1 SV=2			0	99	MALPPQEDATASPPR	Phospho(S)@12		-0.000816861	1659.73	830.873	1659.73	830.874	2	12	1.1.1.2387.29	1	42.7801	3172.56	42.4576
5	41.78	41.78	21.8	11.19	9.084	sp|Q9UQ35|SRRM2_HUMAN	Serine/arginine repetitive matrix protein 2 OS=Homo sapiens GN=SRRM2 PE=1 SV=2			0	99	MALPPQEDATASPPR	Phospho(S)@12		0.00167262	1659.73	830.875	1659.73	830.874	2	13	1.1.1.2319.28	1	39.9238	7142.69	40.1087
5	41.78	41.78	21.8	11.19	9.084	sp|Q9UQ35|SRRM2_HUMAN	Serine/arginine repetitive matrix protein 2 OS=Homo sapiens GN=SRRM2 PE=1 SV=2			0	99	MALPPQEDATASPPR	Phospho(T)@10		0.00167262	1659.73	830.875	1659.73	830.874	2	13	1.1.1.2327.23	1	40.2576	7142.69	40.1087
5	41.78	41.78	21.8	11.19	9.084	sp|Q9UQ35|SRRM2_HUMAN	Serine/arginine repetitive matrix protein 2 OS=Homo sapiens GN=SRRM2 PE=1 SV=2			0	99	MALPPQEDATASPPR	Phospho(S)@12		-0.00130514	1659.73	830.873	1659.73	830.874	2	10	1.1.1.2406.26	1	43.5764	2001.75	43.4678
5	41.78	41.78	21.8	11.19	9.084	sp|Q9UQ35|SRRM2_HUMAN	Serine/arginine repetitive matrix protein 2 OS=Homo sapiens GN=SRRM2 PE=1 SV=2			0	99	MALPPQEDATASPPR	Phospho(S)@12		-0.00142721	1659.73	830.873	1659.73	830.874	2	11	1.1.1.2370.22	0	42.06	4179.87	41.9529
5	41.78	41.78	21.8	11.19	9.084	sp|Q9UQ35|SRRM2_HUMAN	Serine/arginine repetitive matrix protein 2 OS=Homo sapiens GN=SRRM2 PE=1 SV=2			0	99	MAPALSGANLTSPR	Phospho(S)@12		-0.00194679	1464.68	733.346	1464.68	733.347	2	16	1.1.1.2447.17	1	45.2938	8092.44	45.3609
5	41.78	41.78	21.8	11.19	9.084	sp|Q9UQ35|SRRM2_HUMAN	Serine/arginine repetitive matrix protein 2 OS=Homo sapiens GN=SRRM2 PE=1 SV=2			0	92.41	MAPALSGANLTSPR	Phospho(S)@12		0.000616692	1464.68	733.347	1464.68	733.347	2	10	1.1.1.2439.21	1	44.962	5754	45.1514
5	41.78	41.78	21.8	11.19	9.084	sp|Q9UQ35|SRRM2_HUMAN	Serine/arginine repetitive matrix protein 2 OS=Homo sapiens GN=SRRM2 PE=1 SV=2			0	99	QSHSGSISPYPK	Gln->pyro-Glu@N-term; Phospho(S)@8		-0.00113917	1349.56	675.789	1349.57	675.79	2	15	1.1.1.2034.20	1	27.9729	10257.6	27.7867
5	41.78	41.78	21.8	11.19	9.084	sp|Q9UQ35|SRRM2_HUMAN	Serine/arginine repetitive matrix protein 2 OS=Homo sapiens GN=SRRM2 PE=1 SV=2			0	99	QSHSGSISPYPK	Gln->pyro-Glu@N-term; Phospho(S)@6		-4.05355e-05	1349.57	675.79	1349.57	675.79	2	11	1.1.1.2018.19	1	27.3044	9042.23	27.7029
5	41.78	41.78	21.8	11.19	9.084	sp|Q9UQ35|SRRM2_HUMAN	Serine/arginine repetitive matrix protein 2 OS=Homo sapiens GN=SRRM2 PE=1 SV=2			0	83.67	QSHSGSISPYPK	Gln->pyro-Glu@N-term; Phospho(S)@8		-0.00113917	1349.56	675.789	1349.57	675.79	2	10	1.1.1.2039.20	1	28.1816	10446.8	27.7449
5	41.78	41.78	21.8	11.19	9.084	sp|Q9UQ35|SRRM2_HUMAN	Serine/arginine repetitive matrix protein 2 OS=Homo sapiens GN=SRRM2 PE=1 SV=2			0	99	SCFESSPDPELK	Carbamidomethyl(C)@2; Phospho(S)@6		-0.000178761	1474.57	738.292	1474.57	738.292	2	12	1.1.1.2305.24	1	39.3298	33719.7	39.4757
5	41.78	41.78	21.8	11.19	9.084	sp|Q9UQ35|SRRM2_HUMAN	Serine/arginine repetitive matrix protein 2 OS=Homo sapiens GN=SRRM2 PE=1 SV=2			0	99	SCFESSPDPELK	Carbamidomethyl(C)@2; Phospho(S)@6		-0.000178761	1474.57	738.292	1474.57	738.292	2	12	1.1.1.2313.22	1	39.6656	33719.7	39.4757
5	41.78	41.78	21.8	11.19	9.084	sp|Q9UQ35|SRRM2_HUMAN	Serine/arginine repetitive matrix protein 2 OS=Homo sapiens GN=SRRM2 PE=1 SV=2			0	96.43	SCFESSPDPELK	Carbamidomethyl(C)@2; Phospho(S)@6		-0.000178761	1474.57	738.292	1474.57	738.292	2	9	1.1.1.2321.27	1	40.0074	28759.8	39.5601
5	41.78	41.78	21.8	11.19	9.084	sp|Q9UQ35|SRRM2_HUMAN	Serine/arginine repetitive matrix protein 2 OS=Homo sapiens GN=SRRM2 PE=1 SV=2			0	27.13	SCFESSPDPELK	Carbamidomethyl(C)@2; Phospho(S)@6		0.00140816	1474.57	738.292	1474.57	738.292	2	7	1.1.1.2329.27	1	40.3452	919.727	40.3199
5	41.78	41.78	21.8	11.19	9.084	sp|Q9UQ35|SRRM2_HUMAN	Serine/arginine repetitive matrix protein 2 OS=Homo sapiens GN=SRRM2 PE=1 SV=2			0	99	SPGMLEPLGSSR	Phospho(S)@1		0.00333276	1309.58	655.796	1309.57	655.794	2	15	1.1.1.2556.10	1	49.8677	7942.23	49.8568
5	41.78	41.78	21.8	11.19	9.084	sp|Q9UQ35|SRRM2_HUMAN	Serine/arginine repetitive matrix protein 2 OS=Homo sapiens GN=SRRM2 PE=1 SV=2			0	99	SPGMLEPLGSSR	Phospho(S)@1		0.00333276	1309.58	655.796	1309.57	655.794	2	12	1.1.1.2564.9	1	50.2032	7942.23	49.8568
5	41.78	41.78	21.8	11.19	9.084	sp|Q9UQ35|SRRM2_HUMAN	Serine/arginine repetitive matrix protein 2 OS=Homo sapiens GN=SRRM2 PE=1 SV=2			0	99	SPVPSAFSDQSR	Phospho(S)@1		-0.00421897	1356.57	679.291	1356.57	679.293	2	9	1.1.1.2237.14	1	36.4694	3298.49	36.2466
5	41.78	41.78	21.8	11.19	9.084	sp|Q9UQ35|SRRM2_HUMAN	Serine/arginine repetitive matrix protein 2 OS=Homo sapiens GN=SRRM2 PE=1 SV=2			0	99	SRSPLAIR	Phospho(S)@1; Phospho(S)@3	missed R-S@2	0.00230575	1058.47	530.242	1058.47	530.241	2	9	1.1.1.2083.8	1	30.0028	2204.68	29.9089
5	41.78	41.78	21.8	11.19	9.084	sp|Q9UQ35|SRRM2_HUMAN	Serine/arginine repetitive matrix protein 2 OS=Homo sapiens GN=SRRM2 PE=1 SV=2			0	99	SRSPLAIR	Phospho(S)@1; Phospho(S)@3	missed R-S@2	-0.00111222	1058.47	530.24	1058.47	530.241	2	10	1.1.1.2032.9	1	27.8802	11083.1	28.2878
5	41.78	41.78	21.8	11.19	9.084	sp|Q9UQ35|SRRM2_HUMAN	Serine/arginine repetitive matrix protein 2 OS=Homo sapiens GN=SRRM2 PE=1 SV=2			0	99	SRSPLAIR	Phospho(S)@1; Phospho(S)@3	missed R-S@2	-0.00111222	1058.47	530.24	1058.47	530.241	2	11	1.1.1.2056.4	1	28.8735	9880.13	28.4536
5	41.78	41.78	21.8	11.19	9.084	sp|Q9UQ35|SRRM2_HUMAN	Serine/arginine repetitive matrix protein 2 OS=Homo sapiens GN=SRRM2 PE=1 SV=2			0	97.44	SRSPLAIR	Phospho(S)@1; Phospho(S)@3	missed R-S@2	-0.00123429	1058.47	530.24	1058.47	530.241	2	11	1.1.1.2040.10	1	28.2152	12162.5	28.3708
5	41.78	41.78	21.8	11.19	9.084	sp|Q9UQ35|SRRM2_HUMAN	Serine/arginine repetitive matrix protein 2 OS=Homo sapiens GN=SRRM2 PE=1 SV=2			0	97.44	SRSPLAIR	Phospho(S)@1; Phospho(S)@3	missed R-S@2	-0.00123429	1058.47	530.24	1058.47	530.241	2	11	1.1.1.2048.3	1	28.5429	12162.5	28.3708
5	41.78	41.78	21.8	11.19	9.084	sp|Q9UQ35|SRRM2_HUMAN	Serine/arginine repetitive matrix protein 2 OS=Homo sapiens GN=SRRM2 PE=1 SV=2			0	85.37	SRSPLAIR	Phospho(S)@1; Phospho(S)@3	missed R-S@2	0.00120712	1058.47	530.242	1058.47	530.241	2	8	1.1.1.2072.5	1	29.538	2603.17	29.6147
5	41.78	41.78	21.8	11.19	9.084	sp|Q9UQ35|SRRM2_HUMAN	Serine/arginine repetitive matrix protein 2 OS=Homo sapiens GN=SRRM2 PE=1 SV=2			0	81.94	SRTPLLPR	Phospho(S)@1; Phospho(T)@3	missed R-T@2	0.00159499	1098.5	550.258	1098.5	550.257	2	10	1.1.1.2163.9	1	33.3613	15372.9	33.5607
5	41.78	41.78	21.8	11.19	9.084	sp|Q9UQ35|SRRM2_HUMAN	Serine/arginine repetitive matrix protein 2 OS=Homo sapiens GN=SRRM2 PE=1 SV=2			0	15.02	SSGHSSSELSPDAVEK	Phospho(S)@6		0.00526006	1695.7	848.859	1695.7	848.857	2	7	1.1.1.1991.28	1	26.1943	655.744	26.1228
5	41.78	41.78	21.8	11.19	9.084	sp|Q9UQ35|SRRM2_HUMAN	Serine/arginine repetitive matrix protein 2 OS=Homo sapiens GN=SRRM2 PE=1 SV=2			0	99	SSTPPGESYFGVSSLQLK	Phospho(T)@3		-0.00074274	1962.9	982.456	1962.9	982.456	2	14	1.1.1.3104.19	1	72.9762	30587.6	73.1695
5	41.78	41.78	21.8	11.19	9.084	sp|Q9UQ35|SRRM2_HUMAN	Serine/arginine repetitive matrix protein 2 OS=Homo sapiens GN=SRRM2 PE=1 SV=2			0	71.91	SSTPPGESYFGVSSLQLK	Phospho(T)@3		-0.00074274	1962.9	982.456	1962.9	982.456	2	9	1.1.1.3123.20	1	73.785	17494.6	73.3393
5	41.78	41.78	21.8	11.19	9.084	sp|Q9UQ35|SRRM2_HUMAN	Serine/arginine repetitive matrix protein 2 OS=Homo sapiens GN=SRRM2 PE=1 SV=2			0	15.22	SSTPPGESYFGVSSLQLK	Phospho(T)@3		0.0130512	1962.91	982.463	1962.9	982.456	2	8	1.1.1.3121.21	1	73.701	10579.2	73.5524
5	41.78	41.78	21.8	11.19	9.084	sp|Q9UQ35|SRRM2_HUMAN	Serine/arginine repetitive matrix protein 2 OS=Homo sapiens GN=SRRM2 PE=1 SV=2			0	99	THTTALAGRSPSPASGR	Phospho(T)@3; Phospho(S)@12	missed R-S@9	0.00192803	1825.79	609.604	1825.79	609.603	3	12	1.1.1.1763.3	1	16.6523	28240.7	16.2151
5	41.78	41.78	21.8	11.19	9.084	sp|Q9UQ35|SRRM2_HUMAN	Serine/arginine repetitive matrix protein 2 OS=Homo sapiens GN=SRRM2 PE=1 SV=2			0	98.9	THTTALAGRSPSPASGR	Phospho(T)@4; Phospho(S)@12	missed R-S@9	0.000878673	1825.79	913.901	1825.79	913.901	2	9	1.1.1.1747.23	1	15.9937	1376.77	16.2151
5	41.78	41.78	21.8	11.19	9.084	sp|Q9UQ35|SRRM2_HUMAN	Serine/arginine repetitive matrix protein 2 OS=Homo sapiens GN=SRRM2 PE=1 SV=2			0	59.98	THTTALAGRSPSPASGR	Phospho(S)@10	missed R-S@9	-0.0170144	1745.8	582.942	1745.82	582.948	3	9	1.1.1.1717.9	1	14.7403	12637	15.0484
5	41.78	41.78	21.8	11.19	9.084	sp|Q9UQ35|SRRM2_HUMAN	Serine/arginine repetitive matrix protein 2 OS=Homo sapiens GN=SRRM2 PE=1 SV=2			0	51.82	TSPPLLDR	Phospho(S)@2		0.000508648	977.459	489.737	977.458	489.736	2	8	1.1.1.2208.4	1	35.2422	40686	34.8148
5	41.78	41.78	21.8	11.19	9.084	sp|Q9UQ35|SRRM2_HUMAN	Serine/arginine repetitive matrix protein 2 OS=Homo sapiens GN=SRRM2 PE=1 SV=2			0	51.1	TSPPLLDR	Phospho(S)@2		0.000508648	977.459	489.737	977.458	489.736	2	5	1.1.1.2176.2	1	33.8982	19721.7	34.3117
5	41.78	41.78	21.8	11.19	9.084	sp|Q9UQ35|SRRM2_HUMAN	Serine/arginine repetitive matrix protein 2 OS=Homo sapiens GN=SRRM2 PE=1 SV=2			0	41.88	TSPPLLDR	Phospho(S)@2		0.000325542	977.459	489.737	977.458	489.736	2	8	1.1.1.2184.2	1	34.2322	47018.3	34.5627
5	41.78	41.78	21.8	11.19	9.084	sp|Q9UQ35|SRRM2_HUMAN	Serine/arginine repetitive matrix protein 2 OS=Homo sapiens GN=SRRM2 PE=1 SV=2			0	28.43	TSPPLLDR	Phospho(S)@2		0.000508648	977.459	489.737	977.458	489.736	2	8	1.1.1.2192.3	1	34.5679	50272.4	34.6886
5	41.78	41.78	21.8	11.19	9.084	sp|Q9UQ35|SRRM2_HUMAN	Serine/arginine repetitive matrix protein 2 OS=Homo sapiens GN=SRRM2 PE=1 SV=2			0	91.32	VSGRTSPPLLDR	Phospho(T)@5	missed R-T@4	-0.0015421	1376.68	689.347	1376.68	689.348	2	9	1.1.1.2071.18	0	29.5071	7011.05	29.9089
6	38.4	45.11	18.52	13.82	13.51	sp|P35580|MYH10_HUMAN	Myosin-10 OS=Homo sapiens GN=MYH10 PE=1 SV=3			2	99	ADMEDLMSSKDDVGK		missed K-D@10	0.000190868	1639.71	820.861	1639.71	820.861	2	18	1.1.1.2403.26	1	43.4502	6899.04	43.552
6	38.4	45.11	18.52	13.82	13.51	sp|P35580|MYH10_HUMAN	Myosin-10 OS=Homo sapiens GN=MYH10 PE=1 SV=3			2	99	DAASLESQLQDTQELLQEETR			0.000588443	2403.14	1202.58	2403.14	1202.58	2	19	1.1.1.3192.35	1	76.7317	80829.3	76.4428
6	38.4	45.11	18.52	13.82	13.51	sp|P35580|MYH10_HUMAN	Myosin-10 OS=Homo sapiens GN=MYH10 PE=1 SV=3			2	99	DHNIPGELER			-0.00281836	1178.57	590.29	1178.57	590.291	2	10	1.1.1.2018.11	1	27.2978	3202.02	27.4937
6	38.4	45.11	18.52	13.82	13.51	sp|P35580|MYH10_HUMAN	Myosin-10 OS=Homo sapiens GN=MYH10 PE=1 SV=3			2	99	ELDDATEANEGLSR			0.000382662	1518.68	760.347	1518.68	760.347	2	21	1.1.1.2127.30	1	31.8699	106574	31.716
6	38.4	45.11	18.52	13.82	13.51	sp|P35580|MYH10_HUMAN	Myosin-10 OS=Homo sapiens GN=MYH10 PE=1 SV=3			2	99	ELEAELEDER			0.0010641	1231.56	616.786	1231.56	616.786	2	10	1.1.1.2289.11	1	38.6473	23530.8	39.0538
6	38.4	45.11	18.52	13.82	13.51	sp|P35580|MYH10_HUMAN	Myosin-10 OS=Homo sapiens GN=MYH10 PE=1 SV=3			2	99	ELEAELEDERK		missed R-K@10	-0.000829249	1359.65	680.833	1359.65	680.833	2	14	1.1.1.2103.17	1	30.8534	13833.6	30.7104
6	38.4	45.11	18.52	13.82	13.51	sp|P35580|MYH10_HUMAN	Myosin-10 OS=Homo sapiens GN=MYH10 PE=1 SV=3			2	99	IGQLEEQLEQEAK			-0.00197846	1513.76	757.888	1513.76	757.888	2	17	1.1.1.2573.18	1	50.5907	25608.6	50.826
6	38.4	45.11	18.52	13.82	13.51	sp|P35580|MYH10_HUMAN	Myosin-10 OS=Homo sapiens GN=MYH10 PE=1 SV=3			2	99	KLDGETTDLQDQIAELQAQIDELK		missed K-L@1	0.00420659	2713.37	905.464	2713.37	905.463	3	17	1.1.1.3222.6	1	77.9792	5037.97	78.0529
6	38.4	45.11	18.52	13.82	13.51	sp|P35580|MYH10_HUMAN	Myosin-10 OS=Homo sapiens GN=MYH10 PE=1 SV=3			2	99	KVDDDLGTIESLEEAK		missed K-V@1	0.0012939	1760.87	587.964	1760.87	587.963	3	13	1.1.1.2725.3	1	56.973	8574.32	56.8831
6	38.4	45.11	18.52	13.82	13.51	sp|P35580|MYH10_HUMAN	Myosin-10 OS=Homo sapiens GN=MYH10 PE=1 SV=3			2	99	LQQELDDLTVDLDHQR			0.00188012	1936.95	646.658	1936.95	646.657	3	15	1.1.1.2771.6	1	58.9144	8833.71	58.8644
6	38.4	45.11	18.52	13.82	13.51	sp|P35580|MYH10_HUMAN	Myosin-10 OS=Homo sapiens GN=MYH10 PE=1 SV=3			2	99	MQAHIQDLEEQLDEEEGAR			0.00183059	2240	747.675	2240	747.674	3	20	1.1.1.2730.16	1	57.196	7561.73	57.137
6	38.4	45.11	18.52	13.82	13.51	sp|P35580|MYH10_HUMAN	Myosin-10 OS=Homo sapiens GN=MYH10 PE=1 SV=3			2	99	NSLQEQQEEEEEAR			-0.00111813	1717.74	859.876	1717.74	859.877	2	16	1.1.1.1936.35	1	23.8968	10231.6	23.8229
6	38.4	45.11	18.52	13.82	13.51	sp|P35580|MYH10_HUMAN	Myosin-10 OS=Homo sapiens GN=MYH10 PE=1 SV=3			2	99	NSLQEQQEEEEEARK		missed R-K@14	-0.000131877	1845.83	923.924	1845.83	923.924	2	9	1.1.1.1850.41	1	20.299	1198.12	20.4721
6	38.4	45.11	18.52	13.82	13.51	sp|P35580|MYH10_HUMAN	Myosin-10 OS=Homo sapiens GN=MYH10 PE=1 SV=3			2	99	QEEELQAKDEELLK	Gln->pyro-Glu@N-term	missed K-D@8	-0.00593698	1683.81	842.914	1683.82	842.917	2	18	1.1.1.2598.22	1	51.6516	9231.45	51.7994
6	38.4	45.11	18.52	13.82	13.51	sp|P35580|MYH10_HUMAN	Myosin-10 OS=Homo sapiens GN=MYH10 PE=1 SV=3			2	99	QLEEAEEEATR			-0.000790707	1303.59	652.802	1303.59	652.802	2	13	1.1.1.1950.20	1	24.4711	20414.8	24.2849
6	38.4	45.11	18.52	13.82	13.51	sp|P35580|MYH10_HUMAN	Myosin-10 OS=Homo sapiens GN=MYH10 PE=1 SV=3			2	99	QLEEEKNSLQEQQEEEEEAR	Gln->pyro-Glu@N-term	missed K-N@6	0.00108064	2457.08	1229.55	2457.08	1229.55	2	15	1.1.1.2453.38	1	45.5653	1635.67	45.5704
6	38.4	45.11	18.52	13.82	13.51	sp|P35580|MYH10_HUMAN	Myosin-10 OS=Homo sapiens GN=MYH10 PE=1 SV=3			2	99	VDDDLGTIESLEEAK			-0.000189814	1632.77	817.394	1632.77	817.394	2	12	1.1.1.2868.8	1	62.9914	23098.6	62.5607
6	38.4	45.11	18.52	13.82	13.51	sp|P35580|MYH10_HUMAN	Myosin-10 OS=Homo sapiens GN=MYH10 PE=1 SV=3			2	99	VEGELEEMER			-0.00415871	1219.53	610.775	1219.54	610.777	2	13	1.1.1.2238.8	1	36.5064	18468.4	36.5391
6	38.4	45.11	18.52	13.82	13.51	sp|P35580|MYH10_HUMAN	Myosin-10 OS=Homo sapiens GN=MYH10 PE=1 SV=3			1.30103	95.18	DLEAQIEAANK			0.0129881	1200.61	601.313	1200.6	601.307	2	10	1.1.1.2477.5	0	46.5436	29825.2	46.8725
6	38.4	45.11	18.52	13.82	13.51	sp|P35580|MYH10_HUMAN	Myosin-10 OS=Homo sapiens GN=MYH10 PE=1 SV=3			0.939302	88.93	RQLEEAEEEATR		missed R-Q@1	-0.00445341	1459.69	730.85	1459.69	730.852	2	9	1.1.1.1903.28	1	22.5122	4338.6	22.5281
6	38.4	45.11	18.52	13.82	13.51	sp|P35580|MYH10_HUMAN	Myosin-10 OS=Homo sapiens GN=MYH10 PE=1 SV=3			0.104577	22.17	QLEEEKNSLQEQQEEEEEARK		missed K-N@6; missed R-K@20	0.00395454	2602.2	651.558	2602.2	651.557	4	7	1.1.1.2062.11	1	29.1283	2143.77	29.1169
6	38.4	45.11	18.52	13.82	13.51	sp|P35580|MYH10_HUMAN	Myosin-10 OS=Homo sapiens GN=MYH10 PE=1 SV=3			0	99	DAASLESQLQDTQELLQEETR			0.000588443	2403.14	1202.58	2403.14	1202.58	2	23	1.1.1.3184.38	1	76.3925	80829.3	76.4428
6	38.4	45.11	18.52	13.82	13.51	sp|P35580|MYH10_HUMAN	Myosin-10 OS=Homo sapiens GN=MYH10 PE=1 SV=3			0	99	DAASLESQLQDTQELLQEETR	Deamidated(Q)@17		0.00851563	2404.13	1203.07	2404.12	1203.07	2	14	1.1.1.3202.39	1	77.1563	1126.75	77.1631
6	38.4	45.11	18.52	13.82	13.51	sp|P35580|MYH10_HUMAN	Myosin-10 OS=Homo sapiens GN=MYH10 PE=1 SV=3			0	91.39	DHNIPGELER			-0.00294044	1178.57	590.29	1178.57	590.291	2	10	1.1.1.2029.10	1	27.7557	3293.64	27.6189
6	38.4	45.11	18.52	13.82	13.51	sp|P35580|MYH10_HUMAN	Myosin-10 OS=Homo sapiens GN=MYH10 PE=1 SV=3			0	83.22	DHNIPGELER			-0.0113633	1178.56	590.286	1178.57	590.291	2	9	1.1.1.2042.9	1	28.2992	2384.46	27.8703
6	38.4	45.11	18.52	13.82	13.51	sp|P35580|MYH10_HUMAN	Myosin-10 OS=Homo sapiens GN=MYH10 PE=1 SV=3			0	68.28	DLEAQIEAANK			0.0134764	1200.61	601.313	1200.6	601.307	2	10	1.1.1.2485.3	0	46.8777	31547.2	46.9565
6	38.4	45.11	18.52	13.82	13.51	sp|P35580|MYH10_HUMAN	Myosin-10 OS=Homo sapiens GN=MYH10 PE=1 SV=3			0	99	EDQSILCTGESGAGK	Carbamidomethyl(C)@7		0.00147074	1550.69	776.352	1550.69	776.351	2	14	1.1.1.2156.27	0	33.0815	19225.7	32.8874
6	38.4	45.11	18.52	13.82	13.51	sp|P35580|MYH10_HUMAN	Myosin-10 OS=Homo sapiens GN=MYH10 PE=1 SV=3			0	99	EDQSILCTGESGAGK	Carbamidomethyl(C)@7		0.00111323	1550.69	776.352	1550.69	776.351	2	16	1.1.1.2148.29	0	32.7462	19227.7	32.8874
6	38.4	45.11	18.52	13.82	13.51	sp|P35580|MYH10_HUMAN	Myosin-10 OS=Homo sapiens GN=MYH10 PE=1 SV=3			0	99	EDQSILCTGESGAGK	Carbamidomethyl(C)@7		-0.00145025	1550.69	776.351	1550.69	776.351	2	13	1.1.1.2140.25	0	32.4082	16596.5	32.8032
6	38.4	45.11	18.52	13.82	13.51	sp|P35580|MYH10_HUMAN	Myosin-10 OS=Homo sapiens GN=MYH10 PE=1 SV=3			0	32.06	EDQSILCTGESGAGK	Carbamidomethyl(C)@7		0.00171488	1550.69	776.352	1550.69	776.351	2	7	1.1.1.2164.27	0	33.4183	14655	32.9717
6	38.4	45.11	18.52	13.82	13.51	sp|P35580|MYH10_HUMAN	Myosin-10 OS=Homo sapiens GN=MYH10 PE=1 SV=3			0	80.77	EDQSILCTGESGAGKTENTK	Carbamidomethyl(C)@7	missed K-T@15	0.0044427	2123.97	708.997	2123.96	708.995	3	10	1.1.1.2075.22	0	29.6776	4920.27	29.8246
6	38.4	45.11	18.52	13.82	13.51	sp|P35580|MYH10_HUMAN	Myosin-10 OS=Homo sapiens GN=MYH10 PE=1 SV=3			0	99	ELDDATEANEGLSR			0.000382662	1518.68	760.347	1518.68	760.347	2	16	1.1.1.2119.31	1	31.5345	106574	31.716
6	38.4	45.11	18.52	13.82	13.51	sp|P35580|MYH10_HUMAN	Myosin-10 OS=Homo sapiens GN=MYH10 PE=1 SV=3			0	99	ELDDATEANEGLSR			0.000138521	1518.68	760.347	1518.68	760.347	2	16	1.1.1.2135.26	1	32.2008	100865	31.758
6	38.4	45.11	18.52	13.82	13.51	sp|P35580|MYH10_HUMAN	Myosin-10 OS=Homo sapiens GN=MYH10 PE=1 SV=3			0	99	ELDDATEANEGLSR			-0.000471832	1518.68	760.347	1518.68	760.347	2	13	1.1.1.2143.28	1	32.5357	14330.5	32.0935
6	38.4	45.11	18.52	13.82	13.51	sp|P35580|MYH10_HUMAN	Myosin-10 OS=Homo sapiens GN=MYH10 PE=1 SV=3			0	99	ELDDATEANEGLSR	Deamidated(N)@9		0.00135341	1519.67	760.84	1519.66	760.839	2	13	1.1.1.2103.27	1	30.8617	7449.77	30.7945
6	38.4	45.11	18.52	13.82	13.51	sp|P35580|MYH10_HUMAN	Myosin-10 OS=Homo sapiens GN=MYH10 PE=1 SV=3			0	95.46	ELDDATEANEGLSR	Deamidated(N)@9		0.00312386	1519.67	760.841	1519.66	760.839	2	11	1.1.1.2211.24	1	35.3855	2333.03	35.3626
6	38.4	45.11	18.52	13.82	13.51	sp|P35580|MYH10_HUMAN	Myosin-10 OS=Homo sapiens GN=MYH10 PE=1 SV=3			0	78.36	ELDDATEANEGLSR	Deamidated(N)@9		0.00135341	1519.67	760.84	1519.66	760.839	2	10	1.1.1.2111.25	1	31.1997	7704.72	30.7524
6	38.4	45.11	18.52	13.82	13.51	sp|P35580|MYH10_HUMAN	Myosin-10 OS=Homo sapiens GN=MYH10 PE=1 SV=3			0	75.59	ELDDATEANEGLSR			-0.00431828	1518.68	760.345	1518.68	760.347	2	9	1.1.1.2237.27	1	36.4803	1033.61	36.4552
6	38.4	45.11	18.52	13.82	13.51	sp|P35580|MYH10_HUMAN	Myosin-10 OS=Homo sapiens GN=MYH10 PE=1 SV=3			0	50.74	ELDDATEANEGLSR			0.00373839	1518.68	760.349	1518.68	760.347	2	9	1.1.1.2175.20	1	33.8716	1565.38	33.8525
6	38.4	45.11	18.52	13.82	13.51	sp|P35580|MYH10_HUMAN	Myosin-10 OS=Homo sapiens GN=MYH10 PE=1 SV=3			0	48.85	ELDDATEANEGLSR			-0.000900297	1518.68	760.347	1518.68	760.347	2	9	1.1.1.2201.30	1	34.9687	900.525	34.941
6	38.4	45.11	18.52	13.82	13.51	sp|P35580|MYH10_HUMAN	Myosin-10 OS=Homo sapiens GN=MYH10 PE=1 SV=3			0	46.52	ELDDATEANEGLSR			-0.00248722	1518.68	760.346	1518.68	760.347	2	8	1.1.1.2229.20	1	36.1405	1032.03	36.4552
6	38.4	45.11	18.52	13.82	13.51	sp|P35580|MYH10_HUMAN	Myosin-10 OS=Homo sapiens GN=MYH10 PE=1 SV=3			0	18.86	ELDDATEANEGLSR			-0.00225824	1518.68	760.346	1518.68	760.347	2	5	1.1.1.2631.10	1	53.0311	650.568	52.978
6	38.4	45.11	18.52	13.82	13.51	sp|P35580|MYH10_HUMAN	Myosin-10 OS=Homo sapiens GN=MYH10 PE=1 SV=3			0	16.64	ELDDATEANEGLSR			0.00312803	1518.68	760.349	1518.68	760.347	2	7	1.1.1.2245.26	1	36.8164	1256.49	36.6232
6	38.4	45.11	18.52	13.82	13.51	sp|P35580|MYH10_HUMAN	Myosin-10 OS=Homo sapiens GN=MYH10 PE=1 SV=3			0	99	ELEAELEDER			0.0010641	1231.56	616.786	1231.56	616.786	2	13	1.1.1.2297.12	1	38.9825	23126.2	39.0118
6	38.4	45.11	18.52	13.82	13.51	sp|P35580|MYH10_HUMAN	Myosin-10 OS=Homo sapiens GN=MYH10 PE=1 SV=3			0	99	ELEAELEDER			0.0010641	1231.56	616.786	1231.56	616.786	2	11	1.1.1.2305.10	1	39.3181	23126.2	39.0118
6	38.4	45.11	18.52	13.82	13.51	sp|P35580|MYH10_HUMAN	Myosin-10 OS=Homo sapiens GN=MYH10 PE=1 SV=3			0	97.75	ELEAELEDERK		missed R-K@10	-0.000829249	1359.65	680.833	1359.65	680.833	2	11	1.1.1.2095.24	1	30.5224	13833.6	30.7104
6	38.4	45.11	18.52	13.82	13.51	sp|P35580|MYH10_HUMAN	Myosin-10 OS=Homo sapiens GN=MYH10 PE=1 SV=3			0	91.54	ELEAELEDERK	Glu->pyro-Glu@N-term	missed R-K@10	0.00380682	1341.65	671.83	1341.64	671.828	2	8	1.1.1.2459.13	0	45.7936	1630.23	45.7801
6	38.4	45.11	18.52	13.82	13.51	sp|P35580|MYH10_HUMAN	Myosin-10 OS=Homo sapiens GN=MYH10 PE=1 SV=3			0	99	FDQLLAEEK			-0.00214037	1091.55	546.781	1091.55	546.782	2	9	1.1.1.2295.4	0	38.892	2204.78	38.9698
6	38.4	45.11	18.52	13.82	13.51	sp|P35580|MYH10_HUMAN	Myosin-10 OS=Homo sapiens GN=MYH10 PE=1 SV=3			0	99	IGQLEEQLEQEAK			-0.00259752	1513.76	757.887	1513.76	757.888	2	19	1.1.1.2581.16	1	50.927	25607	50.826
6	38.4	45.11	18.52	13.82	13.51	sp|P35580|MYH10_HUMAN	Myosin-10 OS=Homo sapiens GN=MYH10 PE=1 SV=3			0	99	IGQLEEQLEQEAK			-0.00247544	1513.76	757.887	1513.76	757.888	2	13	1.1.1.2589.17	1	51.2667	25595	50.826
6	38.4	45.11	18.52	13.82	13.51	sp|P35580|MYH10_HUMAN	Myosin-10 OS=Homo sapiens GN=MYH10 PE=1 SV=3			0	99	KVDDDLGTIESLEEAK		missed K-V@1	0.0012939	1760.87	587.964	1760.87	587.963	3	11	1.1.1.2717.2	1	56.6337	8574.32	56.8831
6	38.4	45.11	18.52	13.82	13.51	sp|P35580|MYH10_HUMAN	Myosin-10 OS=Homo sapiens GN=MYH10 PE=1 SV=3			0	99	LQQELDDLTVDLDHQR			0.00188012	1936.95	646.658	1936.95	646.657	3	13	1.1.1.2769.4	1	58.8284	8833.71	58.8644
6	38.4	45.11	18.52	13.82	13.51	sp|P35580|MYH10_HUMAN	Myosin-10 OS=Homo sapiens GN=MYH10 PE=1 SV=3			0	99	LQQELDDLTVDLDHQR			0.00188012	1936.95	646.658	1936.95	646.657	3	12	1.1.1.2770.4	1	58.8706	8833.71	58.8644
6	38.4	45.11	18.52	13.82	13.51	sp|P35580|MYH10_HUMAN	Myosin-10 OS=Homo sapiens GN=MYH10 PE=1 SV=3			0	99	LQQELDDLTVDLDHQR	Phospho(T)@9		0.0121114	2016.93	673.316	2016.92	673.312	3	8	1.1.1.2766.4	1	58.7018	2579.37	58.6111
6	38.4	45.11	18.52	13.82	13.51	sp|P35580|MYH10_HUMAN	Myosin-10 OS=Homo sapiens GN=MYH10 PE=1 SV=3			0	99	LQQELDDLTVDLDHQR			0.00188012	1936.95	646.658	1936.95	646.657	3	10	1.1.1.2768.4	1	58.7863	8833.71	58.8644
6	38.4	45.11	18.52	13.82	13.51	sp|P35580|MYH10_HUMAN	Myosin-10 OS=Homo sapiens GN=MYH10 PE=1 SV=3			0	35.77	MQAHIQDLEEQLDEEEGAR			0.00183059	2240	747.675	2240	747.674	3	7	1.1.1.2732.13	1	57.2782	7561.73	57.137
6	38.4	45.11	18.52	13.82	13.51	sp|P35580|MYH10_HUMAN	Myosin-10 OS=Homo sapiens GN=MYH10 PE=1 SV=3			0	99	QEEELQAKDEELLK	Gln->pyro-Glu@N-term	missed K-D@8	-0.00593698	1683.81	842.914	1683.82	842.917	2	17	1.1.1.2606.16	1	51.9843	9231.45	51.7994
6	38.4	45.11	18.52	13.82	13.51	sp|P35580|MYH10_HUMAN	Myosin-10 OS=Homo sapiens GN=MYH10 PE=1 SV=3			0	99	QLEEAEEEATR			-0.000790707	1303.59	652.802	1303.59	652.802	2	12	1.1.1.1942.23	1	24.1388	20414.8	24.2849
6	38.4	45.11	18.52	13.82	13.51	sp|P35580|MYH10_HUMAN	Myosin-10 OS=Homo sapiens GN=MYH10 PE=1 SV=3			0	99	QLEEEKNSLQEQQEEEEEAR	Gln->pyro-Glu@N-term	missed K-N@6	0.00108064	2457.08	1229.55	2457.08	1229.55	2	12	1.1.1.2449.36	1	45.3978	1635.67	45.5704
6	38.4	45.11	18.52	13.82	13.51	sp|P35580|MYH10_HUMAN	Myosin-10 OS=Homo sapiens GN=MYH10 PE=1 SV=3			0	94.47	QLEEEKNSLQEQQEEEEEAR	Deamidated(N)@7	missed K-N@6	0.00763884	2475.1	826.039	2475.09	826.037	3	8	1.1.1.2084.23	1	30.0575	365.685	30.0354
6	38.4	45.11	18.52	13.82	13.51	sp|P35580|MYH10_HUMAN	Myosin-10 OS=Homo sapiens GN=MYH10 PE=1 SV=3			0	99	TQLEELEDELQATEDAK			-0.000303483	1960.91	981.463	1960.91	981.463	2	24	1.1.1.3132.14	0	74.1615	235914	74.0621
6	38.4	45.11	18.52	13.82	13.51	sp|P35580|MYH10_HUMAN	Myosin-10 OS=Homo sapiens GN=MYH10 PE=1 SV=3			0	99	VDDDLGTIESLEEAK			-6.77437e-05	1632.77	817.394	1632.77	817.394	2	18	1.1.1.2860.8	1	62.6549	34975.9	62.4758
6	38.4	45.11	18.52	13.82	13.51	sp|P35580|MYH10_HUMAN	Myosin-10 OS=Homo sapiens GN=MYH10 PE=1 SV=3			0	99	VDDDLGTIESLEEAK			-6.77437e-05	1632.77	817.394	1632.77	817.394	2	14	1.1.1.2852.10	1	62.3181	34975.9	62.4758
6	38.4	45.11	18.52	13.82	13.51	sp|P35580|MYH10_HUMAN	Myosin-10 OS=Homo sapiens GN=MYH10 PE=1 SV=3			0	99	VDDDLGTIESLEEAK			-0.00690368	1632.77	817.39	1632.77	817.394	2	9	1.1.1.2878.13	1	63.4179	1412.14	63.5736
6	38.4	45.11	18.52	13.82	13.51	sp|P35580|MYH10_HUMAN	Myosin-10 OS=Homo sapiens GN=MYH10 PE=1 SV=3			0	90.12	VDDDLGTIESLEEAK			-6.77437e-05	1632.77	817.394	1632.77	817.394	2	9	1.1.1.2850.11	1	62.2342	34975.9	62.4758
6	38.4	45.11	18.52	13.82	13.51	sp|P35580|MYH10_HUMAN	Myosin-10 OS=Homo sapiens GN=MYH10 PE=1 SV=3			0	99	VEGELEEMER			0.00304346	1219.54	610.778	1219.54	610.777	2	8	1.1.1.2230.5	1	36.1698	1815.07	36.1631
6	38.4	45.11	18.52	13.82	13.51	sp|P35580|MYH10_HUMAN	Myosin-10 OS=Homo sapiens GN=MYH10 PE=1 SV=3			0	99	VEGELEEMER			-0.00183936	1219.54	610.776	1219.54	610.777	2	12	1.1.1.2246.4	1	36.8403	14982	36.6654
6	38.4	45.11	18.52	13.82	13.51	sp|P35580|MYH10_HUMAN	Myosin-10 OS=Homo sapiens GN=MYH10 PE=1 SV=3			0	67.64	VEGELEEMER			0.0020669	1219.54	610.778	1219.54	610.777	2	8	1.1.1.2254.12	1	37.1839	1719.77	37.2977
6	38.4	45.11	18.52	13.82	13.51	sp|P35580|MYH10_HUMAN	Myosin-10 OS=Homo sapiens GN=MYH10 PE=1 SV=3			0	61.72	VEGELEEMER	Oxidation(M)@8		-0.00746616	1235.53	618.77	1235.53	618.774	2	6	1.1.1.1868.16	1	21.0359	1665.79	21.188
7	34.99	34.99	8.028	5.101	4.305	sp|Q14204|DYHC1_HUMAN	Cytoplasmic dynein 1 heavy chain 1 OS=Homo sapiens GN=DYNC1H1 PE=1 SV=5			2	99	DFPLNDLLSATELDK			-0.000123474	1689.85	845.93	1689.85	845.93	2	13	1.1.1.3228.3	1	78.2286	2443.48	78.5537
7	34.99	34.99	8.028	5.101	4.305	sp|Q14204|DYHC1_HUMAN	Cytoplasmic dynein 1 heavy chain 1 OS=Homo sapiens GN=DYNC1H1 PE=1 SV=5			2	99	DIQMPDGIR			0.00685788	1043.51	522.764	1043.51	522.761	2	7	1.1.1.2470.4	1	46.2489	808.197	46.2427
7	34.99	34.99	8.028	5.101	4.305	sp|Q14204|DYHC1_HUMAN	Cytoplasmic dynein 1 heavy chain 1 OS=Homo sapiens GN=DYNC1H1 PE=1 SV=5			2	99	EALELTDTGLLSGSEER			-0.00381076	1818.88	910.448	1818.88	910.45	2	18	1.1.1.2897.21	1	64.2296	4382.33	64.2514
7	34.99	34.99	8.028	5.101	4.305	sp|Q14204|DYHC1_HUMAN	Cytoplasmic dynein 1 heavy chain 1 OS=Homo sapiens GN=DYNC1H1 PE=1 SV=5			2	99	EVDGLDVSK			0.000128198	960.477	481.245	960.476	481.245	2	8	1.1.1.2003.3	1	26.6696	6097.88	26.8726
7	34.99	34.99	8.028	5.101	4.305	sp|Q14204|DYHC1_HUMAN	Cytoplasmic dynein 1 heavy chain 1 OS=Homo sapiens GN=DYNC1H1 PE=1 SV=5			2	99	GKEDEGEEAASPMLQIQR		missed K-E@2	0.00276771	1986.93	663.319	1986.93	663.318	3	11	1.1.1.2349.10	1	41.1705	2023.25	41.0765
7	34.99	34.99	8.028	5.101	4.305	sp|Q14204|DYHC1_HUMAN	Cytoplasmic dynein 1 heavy chain 1 OS=Homo sapiens GN=DYNC1H1 PE=1 SV=5			2	99	KYTGEDFDEDLR		missed K-Y@1	0.00399468	1486.66	744.338	1486.66	744.336	2	14	1.1.1.2291.17	1	38.7358	3307.11	38.8026
7	34.99	34.99	8.028	5.101	4.305	sp|Q14204|DYHC1_HUMAN	Cytoplasmic dynein 1 heavy chain 1 OS=Homo sapiens GN=DYNC1H1 PE=1 SV=5			2	99	LDMEIER			2.21063e-05	904.432	453.224	904.432	453.223	2	5	1.1.1.2248.2	1	36.9227	525.451	36.9184
7	34.99	34.99	8.028	5.101	4.305	sp|Q14204|DYHC1_HUMAN	Cytoplasmic dynein 1 heavy chain 1 OS=Homo sapiens GN=DYNC1H1 PE=1 SV=5			2	99	MQMLEDEDDLAYAETEK			0.00502111	2029.86	1015.93	2029.85	1015.93	2	10	1.1.1.2759.31	1	58.4288	1435.77	58.6111
7	34.99	34.99	8.028	5.101	4.305	sp|Q14204|DYHC1_HUMAN	Cytoplasmic dynein 1 heavy chain 1 OS=Homo sapiens GN=DYNC1H1 PE=1 SV=5			2	99	QDLADVVQVCEGK	Carbamidomethyl(C)@10		-0.000628353	1459.7	730.856	1459.7	730.856	2	13	1.1.1.2534.13	1	48.9486	4869.79	48.9351
7	34.99	34.99	8.028	5.101	4.305	sp|Q14204|DYHC1_HUMAN	Cytoplasmic dynein 1 heavy chain 1 OS=Homo sapiens GN=DYNC1H1 PE=1 SV=5			2	99	SIPLDEGEDEAQR			-6.5055e-05	1457.66	729.839	1457.66	729.839	2	13	1.1.1.2159.29	1	33.2095	26738.7	33.3509
7	34.99	34.99	8.028	5.101	4.305	sp|Q14204|DYHC1_HUMAN	Cytoplasmic dynein 1 heavy chain 1 OS=Homo sapiens GN=DYNC1H1 PE=1 SV=5			2	99	TTDLLTDWEK			0.000470961	1220.59	611.304	1220.59	611.304	2	8	1.1.1.2832.2	1	61.4684	1318.89	61.3371
7	34.99	34.99	8.028	5.101	4.305	sp|Q14204|DYHC1_HUMAN	Cytoplasmic dynein 1 heavy chain 1 OS=Homo sapiens GN=DYNC1H1 PE=1 SV=5			2	99	VTDFGDKVEDPTFLNQLQSGVNR	Deamidated(N)@15	missed K-V@7	0.0175304	2579.27	860.763	2579.25	860.757	3	13	1.1.1.2989.14	1	68.1153	1945	68.1006
7	34.99	34.99	8.028	5.101	4.305	sp|Q14204|DYHC1_HUMAN	Cytoplasmic dynein 1 heavy chain 1 OS=Homo sapiens GN=DYNC1H1 PE=1 SV=5			2	99	YTGEDFDEDLR			0.00174263	1358.56	680.289	1358.56	680.289	2	11	1.1.1.2446.12	1	45.2478	8627.58	45.3609
7	34.99	34.99	8.028	5.101	4.305	sp|Q14204|DYHC1_HUMAN	Cytoplasmic dynein 1 heavy chain 1 OS=Homo sapiens GN=DYNC1H1 PE=1 SV=5			1.82391	98.52	DYIPVDQEELR			-0.00110194	1375.66	688.838	1375.66	688.838	2	10	1.1.1.2528.10	1	48.6931	13534.6	48.5552
7	34.99	34.99	8.028	5.101	4.305	sp|Q14204|DYHC1_HUMAN	Cytoplasmic dynein 1 heavy chain 1 OS=Homo sapiens GN=DYNC1H1 PE=1 SV=5			1.65758	97.85	EVDGLDVSKEGTEAWEAAMK		missed K-E@9	-0.000536502	2164	722.34	2164	722.34	3	9	1.1.1.3003.6	1	68.6984	2677.29	68.8165
7	34.99	34.99	8.028	5.101	4.305	sp|Q14204|DYHC1_HUMAN	Cytoplasmic dynein 1 heavy chain 1 OS=Homo sapiens GN=DYNC1H1 PE=1 SV=5			1.50864	97.02	STLKEDVGDEGEEEK		missed K-E@4	0.00733274	1663.75	832.882	1663.74	832.878	2	7	1.1.1.1907.30	1	22.6874	271.69	22.6538
7	34.99	34.99	8.028	5.101	4.305	sp|Q14204|DYHC1_HUMAN	Cytoplasmic dynein 1 heavy chain 1 OS=Homo sapiens GN=DYNC1H1 PE=1 SV=5			1.01323	90.67	EDEGEEAASPMLQIQR			-0.00654086	1801.81	901.912	1801.82	901.915	2	9	1.1.1.2518.25	1	48.2842	4360.62	48.0918
7	34.99	34.99	8.028	5.101	4.305	sp|Q14204|DYHC1_HUMAN	Cytoplasmic dynein 1 heavy chain 1 OS=Homo sapiens GN=DYNC1H1 PE=1 SV=5			0.906578	88.06	DPTVEFPPDLCSR	Carbamidomethyl(C)@11		0.0131803	1531.71	766.863	1531.7	766.856	2	7	1.1.1.2881.7	1	63.5402	496.524	63.5736
7	34.99	34.99	8.028	5.101	4.305	sp|Q14204|DYHC1_HUMAN	Cytoplasmic dynein 1 heavy chain 1 OS=Homo sapiens GN=DYNC1H1 PE=1 SV=5			0.74958	82.82	TEYLSNADER			-0.000166394	1196.53	599.273	1196.53	599.273	2	7	1.1.1.1944.12	1	24.2138	1407.74	24.201
7	34.99	34.99	8.028	5.101	4.305	sp|Q14204|DYHC1_HUMAN	Cytoplasmic dynein 1 heavy chain 1 OS=Homo sapiens GN=DYNC1H1 PE=1 SV=5			0.653647	78.58	MQMLEDEDDLAYAETEKK		missed K-K@17	-0.00153377	2157.94	720.322	2157.94	720.322	3	8	1.1.1.2601.10	1	51.7685	3789.86	51.8838
7	34.99	34.99	8.028	5.101	4.305	sp|Q14204|DYHC1_HUMAN	Cytoplasmic dynein 1 heavy chain 1 OS=Homo sapiens GN=DYNC1H1 PE=1 SV=5			0.565431	73.7	TDSTSDGRPAWMR	Phospho(S)@3		0.00124535	1558.62	780.32	1558.62	780.319	2	9	1.1.1.2324.27	1	40.1344	4233.98	40.1087
7	34.99	34.99	8.028	5.101	4.305	sp|Q14204|DYHC1_HUMAN	Cytoplasmic dynein 1 heavy chain 1 OS=Homo sapiens GN=DYNC1H1 PE=1 SV=5			0.0893756	19.35	YEFGESDLR			-0.0127179	1114.48	558.247	1114.49	558.254	2	6	1.1.1.1973.7	1	25.423	1508.64	25.4565
7	34.99	34.99	8.028	5.101	4.305	sp|Q14204|DYHC1_HUMAN	Cytoplasmic dynein 1 heavy chain 1 OS=Homo sapiens GN=DYNC1H1 PE=1 SV=5			0.025028	30.53	LEDDAKDNQQK	Deamidated(Q)@10	missed K-D@6	0.00832239	1303.6	652.806	1303.59	652.802	2	9	1.1.1.2182.22	0	34.1652	278036	33.7275
7	34.99	34.99	8.028	5.101	4.305	sp|Q14204|DYHC1_HUMAN	Cytoplasmic dynein 1 heavy chain 1 OS=Homo sapiens GN=DYNC1H1 PE=1 SV=5			0	99	DFPLNDLLSATELDK			0.000120666	1689.85	845.93	1689.85	845.93	2	14	1.1.1.3237.13	1	78.6092	9149.78	78.8045
7	34.99	34.99	8.028	5.101	4.305	sp|Q14204|DYHC1_HUMAN	Cytoplasmic dynein 1 heavy chain 1 OS=Homo sapiens GN=DYNC1H1 PE=1 SV=5			0	99	DFPLNDLLSATELDK			0.000120666	1689.85	845.93	1689.85	845.93	2	15	1.1.1.3245.7	1	78.9365	9149.78	78.8045
7	34.99	34.99	8.028	5.101	4.305	sp|Q14204|DYHC1_HUMAN	Cytoplasmic dynein 1 heavy chain 1 OS=Homo sapiens GN=DYNC1H1 PE=1 SV=5			0	99	DFPLNDLLSATELDK	Deamidated(N)@5		-0.00672358	1690.82	846.419	1690.83	846.422	2	10	1.1.1.3263.5	1	79.6905	709.354	79.7256
7	34.99	34.99	8.028	5.101	4.305	sp|Q14204|DYHC1_HUMAN	Cytoplasmic dynein 1 heavy chain 1 OS=Homo sapiens GN=DYNC1H1 PE=1 SV=5			0	98.51	DYIPVDQEELR			-0.00110194	1375.66	688.838	1375.66	688.838	2	10	1.1.1.2520.9	1	48.3548	13534.6	48.5552
7	34.99	34.99	8.028	5.101	4.305	sp|Q14204|DYHC1_HUMAN	Cytoplasmic dynein 1 heavy chain 1 OS=Homo sapiens GN=DYNC1H1 PE=1 SV=5			0	97.43	DYIPVDQEELR			-0.00110194	1375.66	688.838	1375.66	688.838	2	10	1.1.1.2529.13	1	48.7378	13534.6	48.5552
7	34.99	34.99	8.028	5.101	4.305	sp|Q14204|DYHC1_HUMAN	Cytoplasmic dynein 1 heavy chain 1 OS=Homo sapiens GN=DYNC1H1 PE=1 SV=5			0	99	EALELTDTGLLSGSEER			-2.65815e-05	1818.88	910.45	1818.88	910.45	2	14	1.1.1.2865.20	1	62.8756	2617.97	63.277
7	34.99	34.99	8.028	5.101	4.305	sp|Q14204|DYHC1_HUMAN	Cytoplasmic dynein 1 heavy chain 1 OS=Homo sapiens GN=DYNC1H1 PE=1 SV=5			0	99	EALELTDTGLLSGSEER			-0.000636933	1818.88	910.449	1818.88	910.45	2	13	1.1.1.2872.23	1	63.1724	4016.07	63.5736
7	34.99	34.99	8.028	5.101	4.305	sp|Q14204|DYHC1_HUMAN	Cytoplasmic dynein 1 heavy chain 1 OS=Homo sapiens GN=DYNC1H1 PE=1 SV=5			0	99	EALELTDTGLLSGSEER			-0.000270722	1818.88	910.449	1818.88	910.45	2	15	1.1.1.2881.20	1	63.551	5790.07	63.743
7	34.99	34.99	8.028	5.101	4.305	sp|Q14204|DYHC1_HUMAN	Cytoplasmic dynein 1 heavy chain 1 OS=Homo sapiens GN=DYNC1H1 PE=1 SV=5			0	99	EALELTDTGLLSGSEER			-0.000759003	1818.88	910.449	1818.88	910.45	2	16	1.1.1.2889.19	1	63.8888	5759.44	63.9123
7	34.99	34.99	8.028	5.101	4.305	sp|Q14204|DYHC1_HUMAN	Cytoplasmic dynein 1 heavy chain 1 OS=Homo sapiens GN=DYNC1H1 PE=1 SV=5			0	99	EALELTDTGLLSGSEER			-0.00381076	1818.88	910.448	1818.88	910.45	2	11	1.1.1.2930.22	1	65.6289	1932.75	65.3952
7	34.99	34.99	8.028	5.101	4.305	sp|Q14204|DYHC1_HUMAN	Cytoplasmic dynein 1 heavy chain 1 OS=Homo sapiens GN=DYNC1H1 PE=1 SV=5			0	99	EALELTDTGLLSGSEER			-0.00417697	1818.88	910.447	1818.88	910.45	2	11	1.1.1.2916.22	1	65.0346	1568.43	65.1829
7	34.99	34.99	8.028	5.101	4.305	sp|Q14204|DYHC1_HUMAN	Cytoplasmic dynein 1 heavy chain 1 OS=Homo sapiens GN=DYNC1H1 PE=1 SV=5			0	99	EALELTDTGLLSGSEER			-0.00442111	1818.88	910.447	1818.88	910.45	2	12	1.1.1.2907.22	1	64.654	2518.57	64.5902
7	34.99	34.99	8.028	5.101	4.305	sp|Q14204|DYHC1_HUMAN	Cytoplasmic dynein 1 heavy chain 1 OS=Homo sapiens GN=DYNC1H1 PE=1 SV=5			0	37.79	EALELTDTGLLSGSEER			-0.00246799	1818.88	910.448	1818.88	910.45	2	6	1.1.1.2962.22	1	66.978	1305.84	66.786
7	34.99	34.99	8.028	5.101	4.305	sp|Q14204|DYHC1_HUMAN	Cytoplasmic dynein 1 heavy chain 1 OS=Homo sapiens GN=DYNC1H1 PE=1 SV=5			0	99	EVDGLDVSK			0.000128198	960.477	481.245	960.476	481.245	2	8	1.1.1.2011.2	1	27.0008	6097.88	26.8726
7	34.99	34.99	8.028	5.101	4.305	sp|Q14204|DYHC1_HUMAN	Cytoplasmic dynein 1 heavy chain 1 OS=Homo sapiens GN=DYNC1H1 PE=1 SV=5			0	96.13	GKEDEGEEAASPMLQIQR		missed K-E@2	0.00459877	1986.94	663.319	1986.93	663.318	3	8	1.1.1.2357.12	1	41.5057	1908.54	41.4098
7	34.99	34.99	8.028	5.101	4.305	sp|Q14204|DYHC1_HUMAN	Cytoplasmic dynein 1 heavy chain 1 OS=Homo sapiens GN=DYNC1H1 PE=1 SV=5			0	30.05	LEDDAKDNQQK	Deamidated(Q)@10	missed K-D@6	0.00807825	1303.6	652.806	1303.59	652.802	2	9	1.1.1.2166.7	0	33.4854	346513	33.5607
7	34.99	34.99	8.028	5.101	4.305	sp|Q14204|DYHC1_HUMAN	Cytoplasmic dynein 1 heavy chain 1 OS=Homo sapiens GN=DYNC1H1 PE=1 SV=5			0	99	SIPLDEGEDEAQR			-6.5055e-05	1457.66	729.839	1457.66	729.839	2	13	1.1.1.2167.18	1	33.5364	26738.7	33.3509
7	34.99	34.99	8.028	5.101	4.305	sp|Q14204|DYHC1_HUMAN	Cytoplasmic dynein 1 heavy chain 1 OS=Homo sapiens GN=DYNC1H1 PE=1 SV=5			0	99	SIPLDEGEDEAQR			-6.5055e-05	1457.66	729.839	1457.66	729.839	2	11	1.1.1.2175.17	1	33.8691	20478.1	33.4351
7	34.99	34.99	8.028	5.101	4.305	sp|Q14204|DYHC1_HUMAN	Cytoplasmic dynein 1 heavy chain 1 OS=Homo sapiens GN=DYNC1H1 PE=1 SV=5			0	84.09	VTDFGDKVEDPTFLNQLQSGVNR		missed K-V@7	-0.00400625	2578.26	860.428	2578.27	860.429	3	10	1.1.1.2997.13	1	68.4528	3342.89	68.2701
7	34.99	34.99	8.028	5.101	4.305	sp|Q14204|DYHC1_HUMAN	Cytoplasmic dynein 1 heavy chain 1 OS=Homo sapiens GN=DYNC1H1 PE=1 SV=5			0	99	YTGEDFDEDLR			0.00174263	1358.56	680.289	1358.56	680.289	2	11	1.1.1.2449.9	1	45.3711	8627.58	45.3609
8	31.9	31.9	14.55	10.27	8.52	tr|J3KPX8|J3KPX8_HUMAN; tr|E9PGC8|E9PGC8_HUMAN; sp|P78559|MAP1A_HUMAN	MAP1 light chain LC2 OS=Homo sapiens GN=MAP1A PE=2 SV=1; MAP1 light chain LC2 OS=Homo sapiens GN=MAP1A PE=2 SV=1; Microtubule-associated protein 1A OS=Homo sapiens GN=MAP1A PE=1 SV=6			2	99	AENEEAAACPAWER	Carbamidomethyl(C)@9		0.00120926	1602.67	802.345	1602.67	802.344	2	14	1.1.1.2188.22	1	34.4159	7011.7	34.1443
8	31.9	31.9	14.55	10.27	8.52	tr|J3KPX8|J3KPX8_HUMAN; tr|E9PGC8|E9PGC8_HUMAN; sp|P78559|MAP1A_HUMAN	MAP1 light chain LC2 OS=Homo sapiens GN=MAP1A PE=2 SV=1; MAP1 light chain LC2 OS=Homo sapiens GN=MAP1A PE=2 SV=1; Microtubule-associated protein 1A OS=Homo sapiens GN=MAP1A PE=1 SV=6			2	99	ELAPAWEDTSPEQDNR			-0.00153179	1856.82	929.415	1856.82	929.416	2	18	1.1.1.2431.35	1	44.6369	11686.5	44.4783
8	31.9	31.9	14.55	10.27	8.52	tr|J3KPX8|J3KPX8_HUMAN; tr|E9PGC8|E9PGC8_HUMAN; sp|P78559|MAP1A_HUMAN	MAP1 light chain LC2 OS=Homo sapiens GN=MAP1A PE=2 SV=1; MAP1 light chain LC2 OS=Homo sapiens GN=MAP1A PE=2 SV=1; Microtubule-associated protein 1A OS=Homo sapiens GN=MAP1A PE=1 SV=6			2	99	ELVPEVPEEQGSK			-0.00091485	1439.71	720.864	1439.71	720.864	2	11	1.1.1.2342.18	1	40.885	2839.4	40.8675
8	31.9	31.9	14.55	10.27	8.52	tr|J3KPX8|J3KPX8_HUMAN; tr|E9PGC8|E9PGC8_HUMAN; sp|P78559|MAP1A_HUMAN	MAP1 light chain LC2 OS=Homo sapiens GN=MAP1A PE=2 SV=1; MAP1 light chain LC2 OS=Homo sapiens GN=MAP1A PE=2 SV=1; Microtubule-associated protein 1A OS=Homo sapiens GN=MAP1A PE=1 SV=6			2	99	ESTFLDEGPDDEQEVPLR			-0.000383559	2074.93	1038.47	2074.93	1038.47	2	18	1.1.1.2755.28	1	58.2583	13340.8	58.1058
8	31.9	31.9	14.55	10.27	8.52	tr|J3KPX8|J3KPX8_HUMAN; tr|E9PGC8|E9PGC8_HUMAN; sp|P78559|MAP1A_HUMAN	MAP1 light chain LC2 OS=Homo sapiens GN=MAP1A PE=2 SV=1; MAP1 light chain LC2 OS=Homo sapiens GN=MAP1A PE=2 SV=1; Microtubule-associated protein 1A OS=Homo sapiens GN=MAP1A PE=1 SV=6			2	99	GELSPSFLNPPLPPSIDDR	Phospho(S)@4		-0.00879959	2130	1066.01	2130	1066.01	2	15	1.1.1.3161.24	1	75.4024	7314.75	75.4638
8	31.9	31.9	14.55	10.27	8.52	tr|J3KPX8|J3KPX8_HUMAN; tr|E9PGC8|E9PGC8_HUMAN; sp|P78559|MAP1A_HUMAN	MAP1 light chain LC2 OS=Homo sapiens GN=MAP1A PE=2 SV=1; MAP1 light chain LC2 OS=Homo sapiens GN=MAP1A PE=2 SV=1; Microtubule-associated protein 1A OS=Homo sapiens GN=MAP1A PE=1 SV=6			2	99	NTSAEKELSSPISPK	Phospho(S)@13	missed K-E@6	-0.00223321	1666.78	834.397	1666.78	834.398	2	11	1.1.1.2214.34	1	35.5203	2000.1	35.4469
8	31.9	31.9	14.55	10.27	8.52	tr|J3KPX8|J3KPX8_HUMAN; tr|E9PGC8|E9PGC8_HUMAN; sp|P78559|MAP1A_HUMAN	MAP1 light chain LC2 OS=Homo sapiens GN=MAP1A PE=2 SV=1; MAP1 light chain LC2 OS=Homo sapiens GN=MAP1A PE=2 SV=1; Microtubule-associated protein 1A OS=Homo sapiens GN=MAP1A PE=1 SV=6			2	99	SEPQDFQEADSWGDTK			-0.00161764	1838.76	920.386	1838.76	920.387	2	13	1.1.1.2486.32	1	46.9439	5378.39	46.8305
8	31.9	31.9	14.55	10.27	8.52	tr|J3KPX8|J3KPX8_HUMAN; tr|E9PGC8|E9PGC8_HUMAN; sp|P78559|MAP1A_HUMAN	MAP1 light chain LC2 OS=Homo sapiens GN=MAP1A PE=2 SV=1; MAP1 light chain LC2 OS=Homo sapiens GN=MAP1A PE=2 SV=1; Microtubule-associated protein 1A OS=Homo sapiens GN=MAP1A PE=1 SV=6			2	99	SHWDDSTSDSELEK	Phospho(S)@8		0.000462747	1714.64	858.326	1714.64	858.325	2	15	1.1.1.2152.32	1	32.917	2580.72	32.8874
8	31.9	31.9	14.55	10.27	8.52	tr|J3KPX8|J3KPX8_HUMAN; tr|E9PGC8|E9PGC8_HUMAN; sp|P78559|MAP1A_HUMAN	MAP1 light chain LC2 OS=Homo sapiens GN=MAP1A PE=2 SV=1; MAP1 light chain LC2 OS=Homo sapiens GN=MAP1A PE=2 SV=1; Microtubule-associated protein 1A OS=Homo sapiens GN=MAP1A PE=1 SV=6			2	99	SPCGLTEQYLHK	Phospho(S)@1; Carbamidomethyl(C)@3		0.00135496	1511.65	756.832	1511.65	756.831	2	18	1.1.1.2449.15	1	45.3761	7942.45	45.3189
8	31.9	31.9	14.55	10.27	8.52	tr|J3KPX8|J3KPX8_HUMAN; tr|E9PGC8|E9PGC8_HUMAN; sp|P78559|MAP1A_HUMAN	MAP1 light chain LC2 OS=Homo sapiens GN=MAP1A PE=2 SV=1; MAP1 light chain LC2 OS=Homo sapiens GN=MAP1A PE=2 SV=1; Microtubule-associated protein 1A OS=Homo sapiens GN=MAP1A PE=1 SV=6			2	99	SPPCEDFSVTGESEK	Carbamidomethyl(C)@4		0.00400214	1667.7	834.859	1667.7	834.857	2	14	1.1.1.2258.33	1	37.3702	2786.65	37.4662
8	31.9	31.9	14.55	10.27	8.52	tr|J3KPX8|J3KPX8_HUMAN; tr|E9PGC8|E9PGC8_HUMAN; sp|P78559|MAP1A_HUMAN	MAP1 light chain LC2 OS=Homo sapiens GN=MAP1A PE=2 SV=1; MAP1 light chain LC2 OS=Homo sapiens GN=MAP1A PE=2 SV=1; Microtubule-associated protein 1A OS=Homo sapiens GN=MAP1A PE=1 SV=6			2	99	VPSAPGQESPIPDPK	Phospho(S)@9		0.0016025	1597.74	799.878	1597.74	799.877	2	15	1.1.1.2221.30	1	35.8127	5974.5	35.5736
8	31.9	31.9	14.55	10.27	8.52	tr|J3KPX8|J3KPX8_HUMAN; tr|E9PGC8|E9PGC8_HUMAN; sp|P78559|MAP1A_HUMAN	MAP1 light chain LC2 OS=Homo sapiens GN=MAP1A PE=2 SV=1; MAP1 light chain LC2 OS=Homo sapiens GN=MAP1A PE=2 SV=1; Microtubule-associated protein 1A OS=Homo sapiens GN=MAP1A PE=1 SV=6			2	99	WLAESPVGLPPEEEDKLTR	Phospho(S)@5	missed K-L@16	0.0174995	2245.08	749.369	2245.07	749.363	3	11	1.1.1.2845.4	1	62.0181	4905.55	62.4334
8	31.9	31.9	14.55	10.27	8.52	tr|J3KPX8|J3KPX8_HUMAN; tr|E9PGC8|E9PGC8_HUMAN; sp|P78559|MAP1A_HUMAN	MAP1 light chain LC2 OS=Homo sapiens GN=MAP1A PE=2 SV=1; MAP1 light chain LC2 OS=Homo sapiens GN=MAP1A PE=2 SV=1; Microtubule-associated protein 1A OS=Homo sapiens GN=MAP1A PE=1 SV=6			1.88606	98.8	YSAQTDITDDSLDR			0.00227232	1598.71	800.361	1598.71	800.36	2	11	1.1.1.2306.27	1	39.3746	5759.45	39.6444
8	31.9	31.9	14.55	10.27	8.52	tr|J3KPX8|J3KPX8_HUMAN; tr|E9PGC8|E9PGC8_HUMAN; sp|P78559|MAP1A_HUMAN	MAP1 light chain LC2 OS=Homo sapiens GN=MAP1A PE=2 SV=1; MAP1 light chain LC2 OS=Homo sapiens GN=MAP1A PE=2 SV=1; Microtubule-associated protein 1A OS=Homo sapiens GN=MAP1A PE=1 SV=6			1.79588	98.44	STTSQVTPAEEKDGHSPMSK	Phospho(S)@16	missed K-D@12	-4.1482e-07	2195.94	732.987	2195.94	732.987	3	9	1.1.1.1802.25	1	18.2719	1972.39	18.3742
8	31.9	31.9	14.55	10.27	8.52	tr|J3KPX8|J3KPX8_HUMAN; tr|E9PGC8|E9PGC8_HUMAN; sp|P78559|MAP1A_HUMAN	MAP1 light chain LC2 OS=Homo sapiens GN=MAP1A PE=2 SV=1; MAP1 light chain LC2 OS=Homo sapiens GN=MAP1A PE=2 SV=1; Microtubule-associated protein 1A OS=Homo sapiens GN=MAP1A PE=1 SV=6			1.56864	97.46	SPFEIISPPASPPEMVGQR	Phospho(S)@1		-0.00470598	2117.98	1060	2117.99	1060	2	11	1.1.1.3096.28	1	72.6434	3527.65	72.872
8	31.9	31.9	14.55	10.27	8.52	tr|J3KPX8|J3KPX8_HUMAN; tr|E9PGC8|E9PGC8_HUMAN; sp|P78559|MAP1A_HUMAN	MAP1 light chain LC2 OS=Homo sapiens GN=MAP1A PE=2 SV=1; MAP1 light chain LC2 OS=Homo sapiens GN=MAP1A PE=2 SV=1; Microtubule-associated protein 1A OS=Homo sapiens GN=MAP1A PE=1 SV=6			0.917215	88.36	ELSSEPQTPPAQK	Phospho(T)@8		-0.00534772	1490.66	746.337	1490.67	746.34	2	7	1.1.1.1848.24	1	20.2015	851.579	20.2624
8	31.9	31.9	14.55	10.27	8.52	tr|J3KPX8|J3KPX8_HUMAN; tr|E9PGC8|E9PGC8_HUMAN; sp|P78559|MAP1A_HUMAN	MAP1 light chain LC2 OS=Homo sapiens GN=MAP1A PE=2 SV=1; MAP1 light chain LC2 OS=Homo sapiens GN=MAP1A PE=2 SV=1; Microtubule-associated protein 1A OS=Homo sapiens GN=MAP1A PE=1 SV=6			0.673664	79.62	NEPTTPSWLADIPPWVPK	Phospho(S)@7		-0.0040414	2127	1064.51	2127.01	1064.51	2	8	1.1.1.3268.32	1	79.9253	2168.88	79.8104
8	31.9	31.9	14.55	10.27	8.52	tr|J3KPX8|J3KPX8_HUMAN; tr|E9PGC8|E9PGC8_HUMAN; sp|P78559|MAP1A_HUMAN	MAP1 light chain LC2 OS=Homo sapiens GN=MAP1A PE=2 SV=1; MAP1 light chain LC2 OS=Homo sapiens GN=MAP1A PE=2 SV=1; Microtubule-associated protein 1A OS=Homo sapiens GN=MAP1A PE=1 SV=6			0.517126	70.58	ELSSPISPK	Phospho(S)@7		-0.000554926	1036.48	519.249	1036.48	519.249	2	8	1.1.1.2192.5	1	34.5695	10808.9	34.899
8	31.9	31.9	14.55	10.27	8.52	tr|J3KPX8|J3KPX8_HUMAN; tr|E9PGC8|E9PGC8_HUMAN; sp|P78559|MAP1A_HUMAN	MAP1 light chain LC2 OS=Homo sapiens GN=MAP1A PE=2 SV=1; MAP1 light chain LC2 OS=Homo sapiens GN=MAP1A PE=2 SV=1; Microtubule-associated protein 1A OS=Homo sapiens GN=MAP1A PE=1 SV=6			0.437707	64.61	ELVPEVPEEQGSKDR		missed K-D@13	-0.00377604	1710.84	571.287	1710.84	571.288	3	8	1.1.1.2226.9	1	36.0055	10302.6	35.8689
8	31.9	31.9	14.55	10.27	8.52	tr|J3KPX8|J3KPX8_HUMAN; tr|E9PGC8|E9PGC8_HUMAN; sp|P78559|MAP1A_HUMAN	MAP1 light chain LC2 OS=Homo sapiens GN=MAP1A PE=2 SV=1; MAP1 light chain LC2 OS=Homo sapiens GN=MAP1A PE=2 SV=1; Microtubule-associated protein 1A OS=Homo sapiens GN=MAP1A PE=1 SV=6			0.0952845	69.3	SPASSFSHSTPSGNGK	Phospho(S)@1; Deamidated(N)@14		0.0041443	1627.66	814.835	1627.65	814.833	2	7	1.1.1.1879.33	1	21.5122	1458.99	21.566
8	31.9	31.9	14.55	10.27	8.52	tr|J3KPX8|J3KPX8_HUMAN; tr|E9PGC8|E9PGC8_HUMAN; sp|P78559|MAP1A_HUMAN	MAP1 light chain LC2 OS=Homo sapiens GN=MAP1A PE=2 SV=1; MAP1 light chain LC2 OS=Homo sapiens GN=MAP1A PE=2 SV=1; Microtubule-associated protein 1A OS=Homo sapiens GN=MAP1A PE=1 SV=6			0	99	AENEEAAACPAWER	Carbamidomethyl(C)@9		0.00120926	1602.67	802.345	1602.67	802.344	2	19	1.1.1.2180.25	1	34.0841	7011.7	34.1443
8	31.9	31.9	14.55	10.27	8.52	tr|J3KPX8|J3KPX8_HUMAN; tr|E9PGC8|E9PGC8_HUMAN; sp|P78559|MAP1A_HUMAN	MAP1 light chain LC2 OS=Homo sapiens GN=MAP1A PE=2 SV=1; MAP1 light chain LC2 OS=Homo sapiens GN=MAP1A PE=2 SV=1; Microtubule-associated protein 1A OS=Homo sapiens GN=MAP1A PE=1 SV=6			0	99	ELAPAWEDTSPEQDNR			-0.00153179	1856.82	929.415	1856.82	929.416	2	12	1.1.1.2423.32	1	44.2972	11686.5	44.4783
8	31.9	31.9	14.55	10.27	8.52	tr|J3KPX8|J3KPX8_HUMAN; tr|E9PGC8|E9PGC8_HUMAN; sp|P78559|MAP1A_HUMAN	MAP1 light chain LC2 OS=Homo sapiens GN=MAP1A PE=2 SV=1; MAP1 light chain LC2 OS=Homo sapiens GN=MAP1A PE=2 SV=1; Microtubule-associated protein 1A OS=Homo sapiens GN=MAP1A PE=1 SV=6			0	54.31	ELSSPISPK	Phospho(S)@7		-0.000432856	1036.48	519.249	1036.48	519.249	2	9	1.1.1.2208.6	1	35.2438	11953.5	35.0673
8	31.9	31.9	14.55	10.27	8.52	tr|J3KPX8|J3KPX8_HUMAN; tr|E9PGC8|E9PGC8_HUMAN; sp|P78559|MAP1A_HUMAN	MAP1 light chain LC2 OS=Homo sapiens GN=MAP1A PE=2 SV=1; MAP1 light chain LC2 OS=Homo sapiens GN=MAP1A PE=2 SV=1; Microtubule-associated protein 1A OS=Homo sapiens GN=MAP1A PE=1 SV=6			0	52.45	ELSSPISPK	Phospho(S)@7		-0.000432856	1036.48	519.249	1036.48	519.249	2	9	1.1.1.2200.4	1	34.905	11953.5	35.0673
8	31.9	31.9	14.55	10.27	8.52	tr|J3KPX8|J3KPX8_HUMAN; tr|E9PGC8|E9PGC8_HUMAN; sp|P78559|MAP1A_HUMAN	MAP1 light chain LC2 OS=Homo sapiens GN=MAP1A PE=2 SV=1; MAP1 light chain LC2 OS=Homo sapiens GN=MAP1A PE=2 SV=1; Microtubule-associated protein 1A OS=Homo sapiens GN=MAP1A PE=1 SV=6			0	41.29	ELSSPISPK	Phospho(S)@7		-0.000188714	1036.48	519.249	1036.48	519.249	2	6	1.1.1.2184.3	1	34.2331	5449.85	34.6466
8	31.9	31.9	14.55	10.27	8.52	tr|J3KPX8|J3KPX8_HUMAN; tr|E9PGC8|E9PGC8_HUMAN; sp|P78559|MAP1A_HUMAN	MAP1 light chain LC2 OS=Homo sapiens GN=MAP1A PE=2 SV=1; MAP1 light chain LC2 OS=Homo sapiens GN=MAP1A PE=2 SV=1; Microtubule-associated protein 1A OS=Homo sapiens GN=MAP1A PE=1 SV=6			0	21.07	ELSSPISPK	Phospho(S)@7		-0.000554926	1036.48	519.249	1036.48	519.249	2	6	1.1.1.2216.9	1	35.5842	10839.9	35.1518
8	31.9	31.9	14.55	10.27	8.52	tr|J3KPX8|J3KPX8_HUMAN; tr|E9PGC8|E9PGC8_HUMAN; sp|P78559|MAP1A_HUMAN	MAP1 light chain LC2 OS=Homo sapiens GN=MAP1A PE=2 SV=1; MAP1 light chain LC2 OS=Homo sapiens GN=MAP1A PE=2 SV=1; Microtubule-associated protein 1A OS=Homo sapiens GN=MAP1A PE=1 SV=6			0	36.95	ELVPEVPEEQGSK			-0.00335626	1439.71	720.863	1439.71	720.864	2	6	1.1.1.2350.20	1	41.2205	2794.42	40.8257
8	31.9	31.9	14.55	10.27	8.52	tr|J3KPX8|J3KPX8_HUMAN; tr|E9PGC8|E9PGC8_HUMAN; sp|P78559|MAP1A_HUMAN	MAP1 light chain LC2 OS=Homo sapiens GN=MAP1A PE=2 SV=1; MAP1 light chain LC2 OS=Homo sapiens GN=MAP1A PE=2 SV=1; Microtubule-associated protein 1A OS=Homo sapiens GN=MAP1A PE=1 SV=6			0	41.88	ELVPEVPEEQGSKDR		missed K-D@13	-0.00166203	1710.84	856.428	1710.84	856.429	2	8	1.1.1.2226.30	1	36.023	1907.16	35.9953
8	31.9	31.9	14.55	10.27	8.52	tr|J3KPX8|J3KPX8_HUMAN; tr|E9PGC8|E9PGC8_HUMAN; sp|P78559|MAP1A_HUMAN	MAP1 light chain LC2 OS=Homo sapiens GN=MAP1A PE=2 SV=1; MAP1 light chain LC2 OS=Homo sapiens GN=MAP1A PE=2 SV=1; Microtubule-associated protein 1A OS=Homo sapiens GN=MAP1A PE=1 SV=6			0	99	ESTFLDEGPDDEQEVPLR			-0.000383559	2074.93	1038.47	2074.93	1038.47	2	16	1.1.1.2751.33	1	58.094	13340.8	58.1058
8	31.9	31.9	14.55	10.27	8.52	tr|J3KPX8|J3KPX8_HUMAN; tr|E9PGC8|E9PGC8_HUMAN; sp|P78559|MAP1A_HUMAN	MAP1 light chain LC2 OS=Homo sapiens GN=MAP1A PE=2 SV=1; MAP1 light chain LC2 OS=Homo sapiens GN=MAP1A PE=2 SV=1; Microtubule-associated protein 1A OS=Homo sapiens GN=MAP1A PE=1 SV=6			0	99	ESTFLDEGPDDEQEVPLR			-0.000383559	2074.93	1038.47	2074.93	1038.47	2	13	1.1.1.2747.31	1	57.9233	13340.8	58.1058
8	31.9	31.9	14.55	10.27	8.52	tr|J3KPX8|J3KPX8_HUMAN; tr|E9PGC8|E9PGC8_HUMAN; sp|P78559|MAP1A_HUMAN	MAP1 light chain LC2 OS=Homo sapiens GN=MAP1A PE=2 SV=1; MAP1 light chain LC2 OS=Homo sapiens GN=MAP1A PE=2 SV=1; Microtubule-associated protein 1A OS=Homo sapiens GN=MAP1A PE=1 SV=6			0	60.88	ESTFLDEGPDDEQEVPLR			0.000104723	2074.93	1038.47	2074.93	1038.47	2	9	1.1.1.2763.32	1	58.5985	12929.4	58.1479
8	31.9	31.9	14.55	10.27	8.52	tr|J3KPX8|J3KPX8_HUMAN; tr|E9PGC8|E9PGC8_HUMAN; sp|P78559|MAP1A_HUMAN	MAP1 light chain LC2 OS=Homo sapiens GN=MAP1A PE=2 SV=1; MAP1 light chain LC2 OS=Homo sapiens GN=MAP1A PE=2 SV=1; Microtubule-associated protein 1A OS=Homo sapiens GN=MAP1A PE=1 SV=6			0	99	GELSPSFLNPPLPPSIDDR	Phospho(S)@6; Deamidated(N)@9		0.00498699	2130.99	1066.5	2130.99	1066.5	2	13	1.1.1.3167.28	1	75.6599	8389.39	75.3365
8	31.9	31.9	14.55	10.27	8.52	tr|J3KPX8|J3KPX8_HUMAN; tr|E9PGC8|E9PGC8_HUMAN; sp|P78559|MAP1A_HUMAN	MAP1 light chain LC2 OS=Homo sapiens GN=MAP1A PE=2 SV=1; MAP1 light chain LC2 OS=Homo sapiens GN=MAP1A PE=2 SV=1; Microtubule-associated protein 1A OS=Homo sapiens GN=MAP1A PE=1 SV=6			0	99	SEPQDFQEADSWGDTK			-0.00161764	1838.76	920.386	1838.76	920.387	2	15	1.1.1.2478.29	1	46.6072	5378.39	46.8305
8	31.9	31.9	14.55	10.27	8.52	tr|J3KPX8|J3KPX8_HUMAN; tr|E9PGC8|E9PGC8_HUMAN; sp|P78559|MAP1A_HUMAN	MAP1 light chain LC2 OS=Homo sapiens GN=MAP1A PE=2 SV=1; MAP1 light chain LC2 OS=Homo sapiens GN=MAP1A PE=2 SV=1; Microtubule-associated protein 1A OS=Homo sapiens GN=MAP1A PE=1 SV=6			0	80.87	SPFEIISPPASPPEMVGQR	Phospho(S)@11		-0.00739153	2117.98	1060	2117.99	1060	2	9	1.1.1.3116.30	1	73.4955	2489.4	73.4671
8	31.9	31.9	14.55	10.27	8.52	tr|J3KPX8|J3KPX8_HUMAN; tr|E9PGC8|E9PGC8_HUMAN; sp|P78559|MAP1A_HUMAN	MAP1 light chain LC2 OS=Homo sapiens GN=MAP1A PE=2 SV=1; MAP1 light chain LC2 OS=Homo sapiens GN=MAP1A PE=2 SV=1; Microtubule-associated protein 1A OS=Homo sapiens GN=MAP1A PE=1 SV=6			0	67.21	SPPCEDFSVTGESEK	Carbamidomethyl(C)@4		0.00534492	1667.7	834.859	1667.7	834.857	2	9	1.1.1.2278.23	1	38.198	2854.35	37.8837
8	31.9	31.9	14.55	10.27	8.52	tr|J3KPX8|J3KPX8_HUMAN; tr|E9PGC8|E9PGC8_HUMAN; sp|P78559|MAP1A_HUMAN	MAP1 light chain LC2 OS=Homo sapiens GN=MAP1A PE=2 SV=1; MAP1 light chain LC2 OS=Homo sapiens GN=MAP1A PE=2 SV=1; Microtubule-associated protein 1A OS=Homo sapiens GN=MAP1A PE=1 SV=6			0	99	VPSAPGQESPIPDPK	Phospho(S)@9		0.0016025	1597.74	799.878	1597.74	799.877	2	16	1.1.1.2213.32	1	35.4765	5974.5	35.5736
8	31.9	31.9	14.55	10.27	8.52	tr|J3KPX8|J3KPX8_HUMAN; tr|E9PGC8|E9PGC8_HUMAN; sp|P78559|MAP1A_HUMAN	MAP1 light chain LC2 OS=Homo sapiens GN=MAP1A PE=2 SV=1; MAP1 light chain LC2 OS=Homo sapiens GN=MAP1A PE=2 SV=1; Microtubule-associated protein 1A OS=Homo sapiens GN=MAP1A PE=1 SV=6			0	92.29	VPSAPGQESPIPDPK	Phospho(S)@9		0.00135836	1597.74	799.877	1597.74	799.877	2	8	1.1.1.2229.22	1	36.1421	4343.34	35.7004
8	31.9	31.9	14.55	10.27	8.52	tr|J3KPX8|J3KPX8_HUMAN; tr|E9PGC8|E9PGC8_HUMAN; sp|P78559|MAP1A_HUMAN	MAP1 light chain LC2 OS=Homo sapiens GN=MAP1A PE=2 SV=1; MAP1 light chain LC2 OS=Homo sapiens GN=MAP1A PE=2 SV=1; Microtubule-associated protein 1A OS=Homo sapiens GN=MAP1A PE=1 SV=6			0	99	WLAESPVGLPPEEEDKLTR	Phospho(S)@5	missed K-L@16	0.00376655	2245.07	749.364	2245.07	749.363	3	11	1.1.1.2837.6	1	61.6829	3049.76	61.7594
8	31.9	31.9	14.55	10.27	8.52	tr|J3KPX8|J3KPX8_HUMAN; tr|E9PGC8|E9PGC8_HUMAN; sp|P78559|MAP1A_HUMAN	MAP1 light chain LC2 OS=Homo sapiens GN=MAP1A PE=2 SV=1; MAP1 light chain LC2 OS=Homo sapiens GN=MAP1A PE=2 SV=1; Microtubule-associated protein 1A OS=Homo sapiens GN=MAP1A PE=1 SV=6			0	39.25	YSAQTDITDDSLDR			0.00227232	1598.71	800.361	1598.71	800.36	2	8	1.1.1.2323.26	1	40.0911	5652.38	39.6444
9	30.63	30.63	36.68	36.04	34.93	sp|P13796|PLSL_HUMAN	Plastin-2 OS=Homo sapiens GN=LCP1 PE=1 SV=6			2	99	AECMLQQAER	Carbamidomethyl(C)@3		0.000200096	1234.54	618.279	1234.54	618.279	2	13	1.1.1.2033.13	1	27.9252	15351.8	27.9955
9	30.63	30.63	36.68	36.04	34.93	sp|P13796|PLSL_HUMAN	Plastin-2 OS=Homo sapiens GN=LCP1 PE=1 SV=6			2	99	EGESLEDLMK			-0.000284259	1149.52	575.768	1149.52	575.768	2	14	1.1.1.2700.3	1	55.9187	311085	55.8719
9	30.63	30.63	36.68	36.04	34.93	sp|P13796|PLSL_HUMAN	Plastin-2 OS=Homo sapiens GN=LCP1 PE=1 SV=6			2	99	EGICAIGGTSEQSSVGTQHSYSEEEK	Carbamidomethyl(C)@4		-0.00165152	2769.2	924.075	2769.2	924.075	3	12	1.1.1.2251.26	1	37.0714	7857.65	36.8762
9	30.63	30.63	36.68	36.04	34.93	sp|P13796|PLSL_HUMAN	Plastin-2 OS=Homo sapiens GN=LCP1 PE=1 SV=6			2	99	EITENLMATGDLDQDGR	Oxidation(M)@7		-0.00312127	1892.84	947.427	1892.84	947.428	2	13	1.1.1.2475.28	1	46.4791	1369.17	46.5369
9	30.63	30.63	36.68	36.04	34.93	sp|P13796|PLSL_HUMAN	Plastin-2 OS=Homo sapiens GN=LCP1 PE=1 SV=6			2	99	FSLVGIGGQDLNEGNR			-0.00101647	1674.83	838.423	1674.83	838.424	2	16	1.1.1.2850.13	1	62.2359	38107.3	61.8016
9	30.63	30.63	36.68	36.04	34.93	sp|P13796|PLSL_HUMAN	Plastin-2 OS=Homo sapiens GN=LCP1 PE=1 SV=6			2	99	GDEEGVPAVVIDMSGLR			0.00248774	1742.85	872.434	1742.85	872.433	2	17	1.1.1.3160.6	1	75.3447	40407.2	75.2088
9	30.63	30.63	36.68	36.04	34.93	sp|P13796|PLSL_HUMAN	Plastin-2 OS=Homo sapiens GN=LCP1 PE=1 SV=6			2	99	GSVSDEEMMELR			-0.0015204	1381.58	691.799	1381.59	691.8	2	14	1.1.1.2498.16	1	47.4364	20897.2	47.4202
9	30.63	30.63	36.68	36.04	34.93	sp|P13796|PLSL_HUMAN	Plastin-2 OS=Homo sapiens GN=LCP1 PE=1 SV=6			2	99	LENCNYAVELGK	Carbamidomethyl(C)@4		-0.000857175	1408.66	705.34	1408.67	705.34	2	9	1.1.1.2339.15	0	40.7569	1368.37	40.8257
9	30.63	30.63	36.68	36.04	34.93	sp|P13796|PLSL_HUMAN	Plastin-2 OS=Homo sapiens GN=LCP1 PE=1 SV=6			2	99	MINLSVPDTIDER	Oxidation(M)@1		-0.00233074	1517.74	759.876	1517.74	759.877	2	14	1.1.1.2694.10	1	55.6729	4966.56	55.4509
9	30.63	30.63	36.68	36.04	34.93	sp|P13796|PLSL_HUMAN	Plastin-2 OS=Homo sapiens GN=LCP1 PE=1 SV=6			2	99	TENLNDDEKLNNAK		missed K-L@9	-0.000503043	1616.76	809.389	1616.76	809.389	2	21	1.1.1.1849.29	1	20.249	52110.7	20.0958
9	30.63	30.63	36.68	36.04	34.93	sp|P13796|PLSL_HUMAN	Plastin-2 OS=Homo sapiens GN=LCP1 PE=1 SV=6			2	99	VDTDGNGYISFNELNDLFK	Deamidated(N)@6		0.00245455	2160.99	1081.5	2160.99	1081.5	2	20	1.1.1.3238.15	1	78.6529	233463	78.6377
9	30.63	30.63	36.68	36.04	34.93	sp|P13796|PLSL_HUMAN	Plastin-2 OS=Homo sapiens GN=LCP1 PE=1 SV=6			2	99	VNDDIIVNWVNETLR			-0.00142763	1798.92	900.467	1798.92	900.468	2	11	1.1.1.3247.14	1	79.0255	1923.38	79.0952
9	30.63	30.63	36.68	36.04	34.93	sp|P13796|PLSL_HUMAN	Plastin-2 OS=Homo sapiens GN=LCP1 PE=1 SV=6			2	99	VREITENLMATGDLDQDGR		missed R-E@2	-0.00168409	2132.02	711.679	2132.02	711.68	3	18	1.1.1.2575.12	1	50.6702	3262.09	50.8683
9	30.63	30.63	36.68	36.04	34.93	sp|P13796|PLSL_HUMAN	Plastin-2 OS=Homo sapiens GN=LCP1 PE=1 SV=6			2	99	VYALPEDLVEVNPK			-0.00151219	1584.84	793.427	1584.84	793.427	2	14	1.1.1.2911.11	1	64.8141	19826.6	64.5479
9	30.63	30.63	36.68	36.04	34.93	sp|P13796|PLSL_HUMAN	Plastin-2 OS=Homo sapiens GN=LCP1 PE=1 SV=6			2	99	YPALHKPENQDIDWGALEGETR			0.00295779	2538.22	635.562	2538.21	635.561	4	13	1.1.1.2693.7	1	55.6283	20743.7	55.7461
9	30.63	30.63	36.68	36.04	34.93	sp|P13796|PLSL_HUMAN	Plastin-2 OS=Homo sapiens GN=LCP1 PE=1 SV=6			0.627088	77.32	EKDDIQR		missed K-D@2	-0.00233333	902.443	452.229	902.446	452.23	2	7	1.1.1.1320.2	1	7.1155	78.1521	7.1258
9	30.63	30.63	36.68	36.04	34.93	sp|P13796|PLSL_HUMAN	Plastin-2 OS=Homo sapiens GN=LCP1 PE=1 SV=6			0	90.37	AECMLQQAER	Carbamidomethyl(C)@3		0.000200096	1234.54	618.279	1234.54	618.279	2	10	1.1.1.2041.19	1	28.2644	15351.8	27.9955
9	30.63	30.63	36.68	36.04	34.93	sp|P13796|PLSL_HUMAN	Plastin-2 OS=Homo sapiens GN=LCP1 PE=1 SV=6			0	99	EGESLEDLMK			0.000743219	1149.52	575.769	1149.52	575.768	2	8	1.1.1.3334.5	1	82.7057	788.743	82.8258
9	30.63	30.63	36.68	36.04	34.93	sp|P13796|PLSL_HUMAN	Plastin-2 OS=Homo sapiens GN=LCP1 PE=1 SV=6			0	99	EGESLEDLMK			-0.000284259	1149.52	575.768	1149.52	575.768	2	13	1.1.1.2692.3	1	55.5828	311085	55.8719
9	30.63	30.63	36.68	36.04	34.93	sp|P13796|PLSL_HUMAN	Plastin-2 OS=Homo sapiens GN=LCP1 PE=1 SV=6			0	99	EGESLEDLMK			8.19526e-05	1149.52	575.769	1149.52	575.768	2	10	1.1.1.2756.2	1	58.2786	2559.85	58.2321
9	30.63	30.63	36.68	36.04	34.93	sp|P13796|PLSL_HUMAN	Plastin-2 OS=Homo sapiens GN=LCP1 PE=1 SV=6			0	99	EGESLEDLMK			0.00491599	1149.53	575.771	1149.52	575.768	2	8	1.1.1.2489.4	1	47.0469	2833.52	47.378
9	30.63	30.63	36.68	36.04	34.93	sp|P13796|PLSL_HUMAN	Plastin-2 OS=Homo sapiens GN=LCP1 PE=1 SV=6			0	99	EGESLEDLMK			0.000377009	1149.52	575.769	1149.52	575.768	2	8	1.1.1.3342.2	1	83.0436	752.863	82.9959
9	30.63	30.63	36.68	36.04	34.93	sp|P13796|PLSL_HUMAN	Plastin-2 OS=Homo sapiens GN=LCP1 PE=1 SV=6			0	99	EGESLEDLMK			0.000377009	1149.52	575.769	1149.52	575.768	2	11	1.1.1.3397.2	1	85.2094	140.986	85.237
9	30.63	30.63	36.68	36.04	34.93	sp|P13796|PLSL_HUMAN	Plastin-2 OS=Homo sapiens GN=LCP1 PE=1 SV=6			0	99	EGESLEDLMK			-0.00108783	1149.52	575.768	1149.52	575.768	2	9	1.1.1.3435.2	1	86.7475	424.823	86.7826
9	30.63	30.63	36.68	36.04	34.93	sp|P13796|PLSL_HUMAN	Plastin-2 OS=Homo sapiens GN=LCP1 PE=1 SV=6			0	99	EGESLEDLMK			0.000132869	1149.52	575.769	1149.52	575.768	2	11	1.1.1.3373.2	1	84.2058	97.4745	84.2694
9	30.63	30.63	36.68	36.04	34.93	sp|P13796|PLSL_HUMAN	Plastin-2 OS=Homo sapiens GN=LCP1 PE=1 SV=6			0	99	EGESLEDLMK			0.000377009	1149.52	575.769	1149.52	575.768	2	7	1.1.1.3467.2	1	88.0925	454.644	88.0029
9	30.63	30.63	36.68	36.04	34.93	sp|P13796|PLSL_HUMAN	Plastin-2 OS=Homo sapiens GN=LCP1 PE=1 SV=6			0	99	EGESLEDLMK			0.00238307	1149.52	575.77	1149.52	575.768	2	7	1.1.1.2819.2	1	60.919	699.827	61.0413
9	30.63	30.63	36.68	36.04	34.93	sp|P13796|PLSL_HUMAN	Plastin-2 OS=Homo sapiens GN=LCP1 PE=1 SV=6			0	99	EGESLEDLMK			-0.00108783	1149.52	575.768	1149.52	575.768	2	9	1.1.1.3406.3	1	85.5887	283.517	85.9581
9	30.63	30.63	36.68	36.04	34.93	sp|P13796|PLSL_HUMAN	Plastin-2 OS=Homo sapiens GN=LCP1 PE=1 SV=6			0	99	EGESLEDLMK			-0.00211532	1149.52	575.767	1149.52	575.768	2	9	1.1.1.2607.4	1	52.0164	1178.94	51.9259
9	30.63	30.63	36.68	36.04	34.93	sp|P13796|PLSL_HUMAN	Plastin-2 OS=Homo sapiens GN=LCP1 PE=1 SV=6			0	99	EGESLEDLMK			0.000499079	1149.52	575.769	1149.52	575.768	2	7	1.1.1.3326.4	1	82.3637	754.181	82.3996
9	30.63	30.63	36.68	36.04	34.93	sp|P13796|PLSL_HUMAN	Plastin-2 OS=Homo sapiens GN=LCP1 PE=1 SV=6			0	99	EGESLEDLMK			0.000499079	1149.52	575.769	1149.52	575.768	2	7	1.1.1.3451.2	1	87.4126	448.466	87.2804
9	30.63	30.63	36.68	36.04	34.93	sp|P13796|PLSL_HUMAN	Plastin-2 OS=Homo sapiens GN=LCP1 PE=1 SV=6			0	99	EGESLEDLMK			-0.0005284	1149.52	575.768	1149.52	575.768	2	12	1.1.1.2716.4	1	56.593	132958	56.1655
9	30.63	30.63	36.68	36.04	34.93	sp|P13796|PLSL_HUMAN	Plastin-2 OS=Homo sapiens GN=LCP1 PE=1 SV=6			0	99	EGESLEDLMK			-0.000111272	1149.52	575.768	1149.52	575.768	2	8	1.1.1.3414.3	1	85.923	372.865	86.0409
9	30.63	30.63	36.68	36.04	34.93	sp|P13796|PLSL_HUMAN	Plastin-2 OS=Homo sapiens GN=LCP1 PE=1 SV=6			0	99	EGESLEDLMK			0.000377009	1149.52	575.769	1149.52	575.768	2	9	1.1.1.3804.2	1	96.2751	88.6252	96.2596
9	30.63	30.63	36.68	36.04	34.93	sp|P13796|PLSL_HUMAN	Plastin-2 OS=Homo sapiens GN=LCP1 PE=1 SV=6			0	99	EGESLEDLMK			-0.000233342	1149.52	575.768	1149.52	575.768	2	7	1.1.1.3310.2	1	81.6797	786.98	81.632
9	30.63	30.63	36.68	36.04	34.93	sp|P13796|PLSL_HUMAN	Plastin-2 OS=Homo sapiens GN=LCP1 PE=1 SV=6			0	99	EGESLEDLMK	Phospho(S)@4		-0.00169082	1229.49	615.751	1229.49	615.752	2	11	1.1.1.2796.2	1	59.9574	5647.47	59.8282
9	30.63	30.63	36.68	36.04	34.93	sp|P13796|PLSL_HUMAN	Plastin-2 OS=Homo sapiens GN=LCP1 PE=1 SV=6			0	99	EGESLEDLMK			-0.000162188	1149.52	575.768	1149.52	575.768	2	10	1.1.1.2748.3	1	57.9421	4042.38	57.8109
9	30.63	30.63	36.68	36.04	34.93	sp|P13796|PLSL_HUMAN	Plastin-2 OS=Homo sapiens GN=LCP1 PE=1 SV=6			0	99	EGESLEDLMK			0.000865289	1149.52	575.769	1149.52	575.768	2	7	1.1.1.3318.3	1	82.0217	717.598	82.1012
9	30.63	30.63	36.68	36.04	34.93	sp|P13796|PLSL_HUMAN	Plastin-2 OS=Homo sapiens GN=LCP1 PE=1 SV=6			0	99	EGESLEDLMK			-0.00358016	1149.52	575.767	1149.52	575.768	2	10	1.1.1.2740.2	1	57.6055	15789.5	57.1795
9	30.63	30.63	36.68	36.04	34.93	sp|P13796|PLSL_HUMAN	Plastin-2 OS=Homo sapiens GN=LCP1 PE=1 SV=6			0	99	EGESLEDLMK			-0.000284259	1149.52	575.768	1149.52	575.768	2	11	1.1.1.2708.3	1	56.2549	316782	55.83
9	30.63	30.63	36.68	36.04	34.93	sp|P13796|PLSL_HUMAN	Plastin-2 OS=Homo sapiens GN=LCP1 PE=1 SV=6			0	99	EGESLEDLMK			-0.00211532	1149.52	575.767	1149.52	575.768	2	11	1.1.1.2732.4	0	57.2707	20909.9	56.8408
9	30.63	30.63	36.68	36.04	34.93	sp|P13796|PLSL_HUMAN	Plastin-2 OS=Homo sapiens GN=LCP1 PE=1 SV=6			0	99	EGESLEDLMK			0.000499079	1149.52	575.769	1149.52	575.768	2	7	1.1.1.3790.2	1	95.7086	129.913	95.7421
9	30.63	30.63	36.68	36.04	34.93	sp|P13796|PLSL_HUMAN	Plastin-2 OS=Homo sapiens GN=LCP1 PE=1 SV=6			0	99	EGESLEDLMK			-0.000233342	1149.52	575.768	1149.52	575.768	2	8	1.1.1.3381.2	1	84.5294	105.522	84.77
9	30.63	30.63	36.68	36.04	34.93	sp|P13796|PLSL_HUMAN	Plastin-2 OS=Homo sapiens GN=LCP1 PE=1 SV=6			0	99	EGESLEDLMK			0.000132869	1149.52	575.769	1149.52	575.768	2	6	1.1.1.3483.2	1	88.7732	402.56	88.7683
9	30.63	30.63	36.68	36.04	34.93	sp|P13796|PLSL_HUMAN	Plastin-2 OS=Homo sapiens GN=LCP1 PE=1 SV=6			0	98.96	EGESLEDLMK	Phospho(S)@4		-0.00169082	1229.49	615.751	1229.49	615.752	2	9	1.1.1.2788.3	1	59.6247	5647.47	59.8282
9	30.63	30.63	36.68	36.04	34.93	sp|P13796|PLSL_HUMAN	Plastin-2 OS=Homo sapiens GN=LCP1 PE=1 SV=6			0	98.85	EGESLEDLMK	Oxidation(M)@9		0.00311706	1165.52	583.768	1165.52	583.766	2	7	1.1.1.2727.3	1	57.0578	622.125	57.137
9	30.63	30.63	36.68	36.04	34.93	sp|P13796|PLSL_HUMAN	Plastin-2 OS=Homo sapiens GN=LCP1 PE=1 SV=6			0	98.5	EGESLEDLMK			0.000499079	1149.52	575.769	1149.52	575.768	2	7	1.1.1.3350.2	1	83.3835	757.332	82.9959
9	30.63	30.63	36.68	36.04	34.93	sp|P13796|PLSL_HUMAN	Plastin-2 OS=Homo sapiens GN=LCP1 PE=1 SV=6			0	98.5	EGESLEDLMK			-0.000233342	1149.52	575.768	1149.52	575.768	2	10	1.1.1.3389.2	1	84.8756	105.522	84.77
9	30.63	30.63	36.68	36.04	34.93	sp|P13796|PLSL_HUMAN	Plastin-2 OS=Homo sapiens GN=LCP1 PE=1 SV=6			0	97.48	EGESLEDLMK	Oxidation(M)@9		-0.00118184	1165.52	583.765	1165.52	583.766	2	11	1.1.1.2204.6	1	35.0752	23989.8	35.236
9	30.63	30.63	36.68	36.04	34.93	sp|P13796|PLSL_HUMAN	Plastin-2 OS=Homo sapiens GN=LCP1 PE=1 SV=6			0	97.11	EGESLEDLMK	Oxidation(M)@9		-0.00188783	1165.52	583.765	1165.52	583.766	2	8	1.1.1.2709.2	1	56.2961	5520.58	55.8719
9	30.63	30.63	36.68	36.04	34.93	sp|P13796|PLSL_HUMAN	Plastin-2 OS=Homo sapiens GN=LCP1 PE=1 SV=6			0	96.4	EGESLEDLMK			-0.000162188	1149.52	575.768	1149.52	575.768	2	10	1.1.1.2724.3	0	56.9309	35583.8	56.5023
9	30.63	30.63	36.68	36.04	34.93	sp|P13796|PLSL_HUMAN	Plastin-2 OS=Homo sapiens GN=LCP1 PE=1 SV=6			0	96.21	EGESLEDLMK	Oxidation(M)@9		-0.00164369	1165.52	583.765	1165.52	583.766	2	9	1.1.1.2701.5	1	55.9622	5474.25	55.8719
9	30.63	30.63	36.68	36.04	34.93	sp|P13796|PLSL_HUMAN	Plastin-2 OS=Homo sapiens GN=LCP1 PE=1 SV=6			0	95.95	EGESLEDLMK			0.00238307	1149.52	575.77	1149.52	575.768	2	6	1.1.1.2802.2	1	60.2073	753.011	60.12
9	30.63	30.63	36.68	36.04	34.93	sp|P13796|PLSL_HUMAN	Plastin-2 OS=Homo sapiens GN=LCP1 PE=1 SV=6			0	94.9	EGESLEDLMK			0.000377009	1149.52	575.769	1149.52	575.768	2	6	1.1.1.3290.3	1	80.8393	732.13	80.8334
9	30.63	30.63	36.68	36.04	34.93	sp|P13796|PLSL_HUMAN	Plastin-2 OS=Homo sapiens GN=LCP1 PE=1 SV=6			0	90.12	EGESLEDLMK			0.00177272	1149.52	575.769	1149.52	575.768	2	6	1.1.1.2843.2	1	61.9324	1089.92	61.9281
9	30.63	30.63	36.68	36.04	34.93	sp|P13796|PLSL_HUMAN	Plastin-2 OS=Homo sapiens GN=LCP1 PE=1 SV=6			0	88.45	EGESLEDLMK			0.00177272	1149.52	575.769	1149.52	575.768	2	6	1.1.1.2851.2	1	62.2689	1165.34	62.138
9	30.63	30.63	36.68	36.04	34.93	sp|P13796|PLSL_HUMAN	Plastin-2 OS=Homo sapiens GN=LCP1 PE=1 SV=6			0	75.34	EGESLEDLMK			0.000204023	1149.52	575.769	1149.52	575.768	2	6	1.1.1.2765.2	1	58.6579	1821.52	58.6532
9	30.63	30.63	36.68	36.04	34.93	sp|P13796|PLSL_HUMAN	Plastin-2 OS=Homo sapiens GN=LCP1 PE=1 SV=6			0	72.47	EGESLEDLMK	Oxidation(M)@9		-0.00118184	1165.52	583.765	1165.52	583.766	2	10	1.1.1.2212.5	1	35.4118	23989.8	35.236
9	30.63	30.63	36.68	36.04	34.93	sp|P13796|PLSL_HUMAN	Plastin-2 OS=Homo sapiens GN=LCP1 PE=1 SV=6			0	72.47	EGESLEDLMK	Oxidation(M)@9		-0.00130392	1165.52	583.765	1165.52	583.766	2	8	1.1.1.2220.5	1	35.7496	19894	35.3204
9	30.63	30.63	36.68	36.04	34.93	sp|P13796|PLSL_HUMAN	Plastin-2 OS=Homo sapiens GN=LCP1 PE=1 SV=6			0	71.53	EGESLEDLMK			-0.000233342	1149.52	575.768	1149.52	575.768	2	5	1.1.1.3274.2	1	80.156	626.958	80.0231
9	30.63	30.63	36.68	36.04	34.93	sp|P13796|PLSL_HUMAN	Plastin-2 OS=Homo sapiens GN=LCP1 PE=1 SV=6			0	71.53	EGESLEDLMK			-0.000721622	1149.52	575.768	1149.52	575.768	2	5	1.1.1.3282.3	1	80.4979	725.358	80.5774
9	30.63	30.63	36.68	36.04	34.93	sp|P13796|PLSL_HUMAN	Plastin-2 OS=Homo sapiens GN=LCP1 PE=1 SV=6			0	34.27	EGESLEDLMK			-0.000843692	1149.52	575.768	1149.52	575.768	2	4	1.1.1.3515.2	1	90.1351	255.021	90.2152
9	30.63	30.63	36.68	36.04	34.93	sp|P13796|PLSL_HUMAN	Plastin-2 OS=Homo sapiens GN=LCP1 PE=1 SV=6			0	30.43	EGESLEDLMK	Oxidation(M)@9		-0.00164369	1165.52	583.765	1165.52	583.766	2	6	1.1.1.2693.4	1	55.6258	5474.25	55.8719
9	30.63	30.63	36.68	36.04	34.93	sp|P13796|PLSL_HUMAN	Plastin-2 OS=Homo sapiens GN=LCP1 PE=1 SV=6			0	21.43	EGESLEDLMK			0.00355083	1149.53	575.77	1149.52	575.768	2	4	1.1.1.3302.2	1	81.3399	663.313	81.336
9	30.63	30.63	36.68	36.04	34.93	sp|P13796|PLSL_HUMAN	Plastin-2 OS=Homo sapiens GN=LCP1 PE=1 SV=6			0	17.73	EGESLEDLMK			0.000132869	1149.52	575.769	1149.52	575.768	2	5	1.1.1.3249.2	1	79.0997	509.72	78.97
9	30.63	30.63	36.68	36.04	34.93	sp|P13796|PLSL_HUMAN	Plastin-2 OS=Homo sapiens GN=LCP1 PE=1 SV=6			0	16.75	EGESLEDLMK			0.00135357	1149.52	575.769	1149.52	575.768	2	5	1.1.1.3265.2	1	79.7728	558.149	79.7679
9	30.63	30.63	36.68	36.04	34.93	sp|P13796|PLSL_HUMAN	Plastin-2 OS=Homo sapiens GN=LCP1 PE=1 SV=6			0	94.45	EGICAIGGTSEQSSVGTQHSYSEEEK	Carbamidomethyl(C)@4		-0.0011022	2769.2	924.075	2769.2	924.075	3	11	1.1.1.2243.35	1	36.7396	7838.5	36.9184
9	30.63	30.63	36.68	36.04	34.93	sp|P13796|PLSL_HUMAN	Plastin-2 OS=Homo sapiens GN=LCP1 PE=1 SV=6			0	24.2	EGICAIGGTSEQSSVGTQHSYSEEEK	Carbamidomethyl(C)@4; Deamidated(Q)@12		0.0166549	2770.2	924.409	2770.19	924.403	3	9	1.1.1.2243.36	1	36.7404	4637.21	36.8762
9	30.63	30.63	36.68	36.04	34.93	sp|P13796|PLSL_HUMAN	Plastin-2 OS=Homo sapiens GN=LCP1 PE=1 SV=6			0	99	EITENLMATGDLDQDGR	Oxidation(M)@7		0.00224984	1892.84	947.429	1892.84	947.428	2	13	1.1.1.2426.39	1	44.4295	4947.9	44.6891
9	30.63	30.63	36.68	36.04	34.93	sp|P13796|PLSL_HUMAN	Plastin-2 OS=Homo sapiens GN=LCP1 PE=1 SV=6			0	99	EITENLMATGDLDQDGR	Oxidation(M)@7		0.00224984	1892.84	947.429	1892.84	947.428	2	16	1.1.1.2434.37	1	44.765	4947.9	44.6891
9	30.63	30.63	36.68	36.04	34.93	sp|P13796|PLSL_HUMAN	Plastin-2 OS=Homo sapiens GN=LCP1 PE=1 SV=6			0	99	EITENLMATGDLDQDGR	Oxidation(M)@7		0.00249398	1892.84	947.43	1892.84	947.428	2	17	1.1.1.2442.32	1	45.0968	4999.17	44.6891
9	30.63	30.63	36.68	36.04	34.93	sp|P13796|PLSL_HUMAN	Plastin-2 OS=Homo sapiens GN=LCP1 PE=1 SV=6			0	99	EITENLMATGDLDQDGR	Oxidation(M)@7		-0.00190056	1892.84	947.427	1892.84	947.428	2	15	1.1.1.2450.29	1	45.433	2932.18	45.2351
9	30.63	30.63	36.68	36.04	34.93	sp|P13796|PLSL_HUMAN	Plastin-2 OS=Homo sapiens GN=LCP1 PE=1 SV=6			0	99	EITENLMATGDLDQDGR			0.00119251	1876.85	939.432	1876.85	939.431	2	20	1.1.1.2661.18	1	54.2962	60780.8	54.6958
9	30.63	30.63	36.68	36.04	34.93	sp|P13796|PLSL_HUMAN	Plastin-2 OS=Homo sapiens GN=LCP1 PE=1 SV=6			0	99	EITENLMATGDLDQDGR			-0.00112683	1876.85	939.43	1876.85	939.431	2	20	1.1.1.2669.22	1	54.6328	161699	55.0309
9	30.63	30.63	36.68	36.04	34.93	sp|P13796|PLSL_HUMAN	Plastin-2 OS=Homo sapiens GN=LCP1 PE=1 SV=6			0	99	EITENLMATGDLDQDGR			-0.00100476	1876.85	939.43	1876.85	939.431	2	21	1.1.1.2677.24	1	54.9698	168730	55.0309
9	30.63	30.63	36.68	36.04	34.93	sp|P13796|PLSL_HUMAN	Plastin-2 OS=Homo sapiens GN=LCP1 PE=1 SV=6			0	99	EITENLMATGDLDQDGR			-0.00100476	1876.85	939.43	1876.85	939.431	2	21	1.1.1.2685.24	1	55.3056	168730	55.0309
9	30.63	30.63	36.68	36.04	34.93	sp|P13796|PLSL_HUMAN	Plastin-2 OS=Homo sapiens GN=LCP1 PE=1 SV=6			0	99	EITENLMATGDLDQDGR			-0.00137097	1876.85	939.43	1876.85	939.431	2	20	1.1.1.2693.29	1	55.6466	63186.8	55.7039
9	30.63	30.63	36.68	36.04	34.93	sp|P13796|PLSL_HUMAN	Plastin-2 OS=Homo sapiens GN=LCP1 PE=1 SV=6			0	99	EITENLMATGDLDQDGR			-0.00137097	1876.85	939.43	1876.85	939.431	2	20	1.1.1.2701.23	1	55.9773	63186.8	55.7039
9	30.63	30.63	36.68	36.04	34.93	sp|P13796|PLSL_HUMAN	Plastin-2 OS=Homo sapiens GN=LCP1 PE=1 SV=6			0	99	EITENLMATGDLDQDGR			-0.00173718	1876.85	939.43	1876.85	939.431	2	19	1.1.1.2709.21	1	56.3119	47145.5	55.8719
9	30.63	30.63	36.68	36.04	34.93	sp|P13796|PLSL_HUMAN	Plastin-2 OS=Homo sapiens GN=LCP1 PE=1 SV=6			0	99	EITENLMATGDLDQDGR			0.00155872	1876.85	939.432	1876.85	939.431	2	21	1.1.1.2717.23	1	56.6512	33259.5	56.2075
9	30.63	30.63	36.68	36.04	34.93	sp|P13796|PLSL_HUMAN	Plastin-2 OS=Homo sapiens GN=LCP1 PE=1 SV=6			0	99	EITENLMATGDLDQDGR			0.00180286	1876.85	939.432	1876.85	939.431	2	18	1.1.1.2725.27	1	56.993	23770.7	56.5445
9	30.63	30.63	36.68	36.04	34.93	sp|P13796|PLSL_HUMAN	Plastin-2 OS=Homo sapiens GN=LCP1 PE=1 SV=6			0	99	EITENLMATGDLDQDGR			-0.00100476	1876.85	939.43	1876.85	939.431	2	17	1.1.1.2733.26	1	57.3313	19494.8	56.8831
9	30.63	30.63	36.68	36.04	34.93	sp|P13796|PLSL_HUMAN	Plastin-2 OS=Homo sapiens GN=LCP1 PE=1 SV=6			0	99	EITENLMATGDLDQDGR			-0.00173718	1876.85	939.43	1876.85	939.431	2	18	1.1.1.2741.26	1	57.6673	10439.7	57.7271
9	30.63	30.63	36.68	36.04	34.93	sp|P13796|PLSL_HUMAN	Plastin-2 OS=Homo sapiens GN=LCP1 PE=1 SV=6			0	99	EITENLMATGDLDQDGR			-0.00137097	1876.85	939.43	1876.85	939.431	2	19	1.1.1.2749.27	1	58.0045	10067.5	57.9789
9	30.63	30.63	36.68	36.04	34.93	sp|P13796|PLSL_HUMAN	Plastin-2 OS=Homo sapiens GN=LCP1 PE=1 SV=6			0	99	EITENLMATGDLDQDGR			-0.00234754	1876.84	939.43	1876.85	939.431	2	18	1.1.1.2757.19	1	58.3348	10201	58.1479
9	30.63	30.63	36.68	36.04	34.93	sp|P13796|PLSL_HUMAN	Plastin-2 OS=Homo sapiens GN=LCP1 PE=1 SV=6			0	99	EITENLMATGDLDQDGR			-0.000638548	1876.85	939.431	1876.85	939.431	2	17	1.1.1.2767.28	1	58.7639	8068.22	58.4844
9	30.63	30.63	36.68	36.04	34.93	sp|P13796|PLSL_HUMAN	Plastin-2 OS=Homo sapiens GN=LCP1 PE=1 SV=6			0	99	EITENLMATGDLDQDGR			-0.00161511	1876.85	939.43	1876.85	939.431	2	15	1.1.1.2775.27	1	59.1003	7175.66	58.6532
9	30.63	30.63	36.68	36.04	34.93	sp|P13796|PLSL_HUMAN	Plastin-2 OS=Homo sapiens GN=LCP1 PE=1 SV=6			0	99	EITENLMATGDLDQDGR			-0.00437656	1876.84	939.429	1876.85	939.431	2	17	1.1.1.2783.15	1	59.4257	4923.08	59.3689
9	30.63	30.63	36.68	36.04	34.93	sp|P13796|PLSL_HUMAN	Plastin-2 OS=Homo sapiens GN=LCP1 PE=1 SV=6			0	99	EITENLMATGDLDQDGR			1.79679e-05	1876.85	939.431	1876.85	939.431	2	15	1.1.1.2791.17	1	59.7614	5652.16	59.8282
9	30.63	30.63	36.68	36.04	34.93	sp|P13796|PLSL_HUMAN	Plastin-2 OS=Homo sapiens GN=LCP1 PE=1 SV=6			0	99	EITENLMATGDLDQDGR			-0.000470313	1876.85	939.431	1876.85	939.431	2	18	1.1.1.2800.28	1	60.1457	6274.67	60.12
9	30.63	30.63	36.68	36.04	34.93	sp|P13796|PLSL_HUMAN	Plastin-2 OS=Homo sapiens GN=LCP1 PE=1 SV=6			0	99	EITENLMATGDLDQDGR			-0.00437656	1876.84	939.429	1876.85	939.431	2	18	1.1.1.2815.17	1	60.7632	7225.99	60.7044
9	30.63	30.63	36.68	36.04	34.93	sp|P13796|PLSL_HUMAN	Plastin-2 OS=Homo sapiens GN=LCP1 PE=1 SV=6			0	99	EITENLMATGDLDQDGR			-0.00425449	1876.84	939.429	1876.85	939.431	2	15	1.1.1.2823.22	1	61.105	6359.28	61.1259
9	30.63	30.63	36.68	36.04	34.93	sp|P13796|PLSL_HUMAN	Plastin-2 OS=Homo sapiens GN=LCP1 PE=1 SV=6			0	99	EITENLMATGDLDQDGR			0.00282558	1876.85	939.432	1876.85	939.431	2	17	1.1.1.2831.25	1	61.4453	6175.62	61.5061
9	30.63	30.63	36.68	36.04	34.93	sp|P13796|PLSL_HUMAN	Plastin-2 OS=Homo sapiens GN=LCP1 PE=1 SV=6			0	99	EITENLMATGDLDQDGR			0.00258144	1876.85	939.432	1876.85	939.431	2	16	1.1.1.2899.24	1	64.3168	5215.44	64.4632
9	30.63	30.63	36.68	36.04	34.93	sp|P13796|PLSL_HUMAN	Plastin-2 OS=Homo sapiens GN=LCP1 PE=1 SV=6			0	99	EITENLMATGDLDQDGR			-0.000470313	1876.85	939.431	1876.85	939.431	2	15	1.1.1.2914.22	1	64.9499	4183.75	64.8019
9	30.63	30.63	36.68	36.04	34.93	sp|P13796|PLSL_HUMAN	Plastin-2 OS=Homo sapiens GN=LCP1 PE=1 SV=6			0	99	EITENLMATGDLDQDGR			-0.000592383	1876.85	939.431	1876.85	939.431	2	15	1.1.1.2923.21	1	65.3309	3663.6	65.2254
9	30.63	30.63	36.68	36.04	34.93	sp|P13796|PLSL_HUMAN	Plastin-2 OS=Homo sapiens GN=LCP1 PE=1 SV=6			0	99	EITENLMATGDLDQDGR			-0.00401035	1876.84	939.429	1876.85	939.431	2	17	1.1.1.2931.15	1	65.6651	4497.89	65.6498
9	30.63	30.63	36.68	36.04	34.93	sp|P13796|PLSL_HUMAN	Plastin-2 OS=Homo sapiens GN=LCP1 PE=1 SV=6			0	99	EITENLMATGDLDQDGR	Oxidation(M)@7		0.00310433	1892.85	947.43	1892.84	947.428	2	13	1.1.1.2458.30	1	45.7658	2499.17	45.7801
9	30.63	30.63	36.68	36.04	34.93	sp|P13796|PLSL_HUMAN	Plastin-2 OS=Homo sapiens GN=LCP1 PE=1 SV=6			0	99	EITENLMATGDLDQDGR	Oxidation(M)@7		0.00471359	1892.85	947.431	1892.84	947.428	2	12	1.1.1.2717.24	1	56.652	1224.54	56.756
9	30.63	30.63	36.68	36.04	34.93	sp|P13796|PLSL_HUMAN	Plastin-2 OS=Homo sapiens GN=LCP1 PE=1 SV=6			0	99	EITENLMATGDLDQDGR			0.00819667	1876.86	939.435	1876.85	939.431	2	13	1.1.1.2992.26	1	68.2524	3635.8	68.1429
9	30.63	30.63	36.68	36.04	34.93	sp|P13796|PLSL_HUMAN	Plastin-2 OS=Homo sapiens GN=LCP1 PE=1 SV=6			0	99	EITENLMATGDLDQDGR			0.0111709	1876.86	939.437	1876.85	939.431	2	17	1.1.1.3019.19	1	69.3872	2267.36	69.3257
9	30.63	30.63	36.68	36.04	34.93	sp|P13796|PLSL_HUMAN	Plastin-2 OS=Homo sapiens GN=LCP1 PE=1 SV=6			0	99	EITENLMATGDLDQDGR	Oxidation(M)@7		0.00652231	1892.85	947.432	1892.84	947.428	2	12	1.1.1.2467.34	1	46.1474	2734.28	45.9482
9	30.63	30.63	36.68	36.04	34.93	sp|P13796|PLSL_HUMAN	Plastin-2 OS=Homo sapiens GN=LCP1 PE=1 SV=6			0	99	EITENLMATGDLDQDGR			0.0110488	1876.86	939.437	1876.85	939.431	2	11	1.1.1.3036.19	1	70.111	1924.01	69.9218
9	30.63	30.63	36.68	36.04	34.93	sp|P13796|PLSL_HUMAN	Plastin-2 OS=Homo sapiens GN=LCP1 PE=1 SV=6			0	99	EITENLMATGDLDQDGR	Deamidated(N)@5		-0.0136613	1877.82	939.916	1877.83	939.923	2	13	1.1.1.2858.26	1	62.5854	25654.2	62.7297
9	30.63	30.63	36.68	36.04	34.93	sp|P13796|PLSL_HUMAN	Plastin-2 OS=Homo sapiens GN=LCP1 PE=1 SV=6			0	99	EITENLMATGDLDQDGR	Deamidated(N)@5		0.0131942	1877.84	939.929	1877.83	939.923	2	13	1.1.1.2897.24	1	64.2321	4989.48	64.3784
9	30.63	30.63	36.68	36.04	34.93	sp|P13796|PLSL_HUMAN	Plastin-2 OS=Homo sapiens GN=LCP1 PE=1 SV=6			0	99	EITENLMATGDLDQDGR			0.000153977	1876.85	939.431	1876.85	939.431	2	9	1.1.1.3415.23	1	85.9795	263.768	86.1648
9	30.63	30.63	36.68	36.04	34.93	sp|P13796|PLSL_HUMAN	Plastin-2 OS=Homo sapiens GN=LCP1 PE=1 SV=6			0	99	EITENLMATGDLDQDGR	Oxidation(M)@7		0.00532394	1892.85	947.431	1892.84	947.428	2	11	1.1.1.2687.30	1	55.3945	2394.91	55.3667
9	30.63	30.63	36.68	36.04	34.93	sp|P13796|PLSL_HUMAN	Plastin-2 OS=Homo sapiens GN=LCP1 PE=1 SV=6			0	99	EITENLMATGDLDQDGR			-0.00106672	1876.85	939.43	1876.85	939.431	2	9	1.1.1.3447.17	1	87.2636	307.365	87.0707
9	30.63	30.63	36.68	36.04	34.93	sp|P13796|PLSL_HUMAN	Plastin-2 OS=Homo sapiens GN=LCP1 PE=1 SV=6			0	99	EITENLMATGDLDQDGR			-0.00436262	1876.84	939.429	1876.85	939.431	2	11	1.1.1.3438.6	1	86.8838	322.145	86.8646
9	30.63	30.63	36.68	36.04	34.93	sp|P13796|PLSL_HUMAN	Plastin-2 OS=Homo sapiens GN=LCP1 PE=1 SV=6			0	99	EITENLMATGDLDQDGR	Deamidated(N)@5		0.0139712	1877.85	939.93	1877.83	939.923	2	10	1.1.1.3009.20	1	68.9626	2063.91	68.8585
9	30.63	30.63	36.68	36.04	34.93	sp|P13796|PLSL_HUMAN	Plastin-2 OS=Homo sapiens GN=LCP1 PE=1 SV=6			0	99	EITENLMATGDLDQDGR			-0.00387434	1876.84	939.429	1876.85	939.431	2	9	1.1.1.3270.21	1	80.0013	613.799	80.0656
9	30.63	30.63	36.68	36.04	34.93	sp|P13796|PLSL_HUMAN	Plastin-2 OS=Homo sapiens GN=LCP1 PE=1 SV=6			0	99	EITENLMATGDLDQDGR			-0.000334303	1876.85	939.431	1876.85	939.431	2	8	1.1.1.3316.25	1	81.9547	590.556	81.8027
9	30.63	30.63	36.68	36.04	34.93	sp|P13796|PLSL_HUMAN	Plastin-2 OS=Homo sapiens GN=LCP1 PE=1 SV=6			0	97.52	EITENLMATGDLDQDGR	Deamidated(N)@5		-0.000643945	1877.83	939.923	1877.83	939.923	2	11	1.1.1.2646.26	1	53.6745	5318.68	53.8605
9	30.63	30.63	36.68	36.04	34.93	sp|P13796|PLSL_HUMAN	Plastin-2 OS=Homo sapiens GN=LCP1 PE=1 SV=6			0	97.35	EITENLMATGDLDQDGR	Oxidation(M)@7		0.000929407	1892.84	947.429	1892.84	947.428	2	11	1.1.1.2672.23	1	54.7593	3584.45	54.9891
9	30.63	30.63	36.68	36.04	34.93	sp|P13796|PLSL_HUMAN	Plastin-2 OS=Homo sapiens GN=LCP1 PE=1 SV=6			0	96.09	EITENLMATGDLDQDGR	Deamidated(N)@5		0.011254	1877.84	939.928	1877.83	939.923	2	9	1.1.1.3297.8	1	81.1491	721.345	81.2127
9	30.63	30.63	36.68	36.04	34.93	sp|P13796|PLSL_HUMAN	Plastin-2 OS=Homo sapiens GN=LCP1 PE=1 SV=6			0	95.22	EITENLMATGDLDQDGR			0.00283952	1876.85	939.432	1876.85	939.431	2	7	1.1.1.3344.22	1	83.1455	529.838	83.0386
9	30.63	30.63	36.68	36.04	34.93	sp|P13796|PLSL_HUMAN	Plastin-2 OS=Homo sapiens GN=LCP1 PE=1 SV=6			0	92.91	EITENLMATGDLDQDGR			0.00430436	1876.85	939.433	1876.85	939.431	2	7	1.1.1.3306.24	1	81.5276	666.589	81.5469
9	30.63	30.63	36.68	36.04	34.93	sp|P13796|PLSL_HUMAN	Plastin-2 OS=Homo sapiens GN=LCP1 PE=1 SV=6			0	80.17	EITENLMATGDLDQDGR			-0.00350813	1876.84	939.429	1876.85	939.431	2	7	1.1.1.3325.22	1	82.336	602.632	82.1865
9	30.63	30.63	36.68	36.04	34.93	sp|P13796|PLSL_HUMAN	Plastin-2 OS=Homo sapiens GN=LCP1 PE=1 SV=6			0	68.01	EITENLMATGDLDQDGR			0.0143447	1876.86	939.438	1876.85	939.431	2	6	1.1.1.3028.16	1	69.768	2507.3	69.6661
9	30.63	30.63	36.68	36.04	34.93	sp|P13796|PLSL_HUMAN	Plastin-2 OS=Homo sapiens GN=LCP1 PE=1 SV=6			0	62.75	EITENLMATGDLDQDGR			0.000276047	1876.85	939.431	1876.85	939.431	2	7	1.1.1.3511.14	1	89.9898	233.083	90.1301
9	30.63	30.63	36.68	36.04	34.93	sp|P13796|PLSL_HUMAN	Plastin-2 OS=Homo sapiens GN=LCP1 PE=1 SV=6			0	49.51	EITENLMATGDLDQDGR			-0.01016	1876.84	939.426	1876.85	939.431	2	8	1.1.1.2644.21	1	53.5862	1796.04	53.6922
9	30.63	30.63	36.68	36.04	34.93	sp|P13796|PLSL_HUMAN	Plastin-2 OS=Homo sapiens GN=LCP1 PE=1 SV=6			0	45.15	EITENLMATGDLDQDGR	Oxidation(M)@7		0.00117355	1892.84	947.429	1892.84	947.428	2	9	1.1.1.2705.22	1	56.1446	1585.02	56.1655
9	30.63	30.63	36.68	36.04	34.93	sp|P13796|PLSL_HUMAN	Plastin-2 OS=Homo sapiens GN=LCP1 PE=1 SV=6			0	34.32	EITENLMATGDLDQDGR	Oxidation(M)@7		0.00469125	1892.85	947.431	1892.84	947.428	2	9	1.1.1.2513.27	1	48.075	1170.82	48.0496
9	30.63	30.63	36.68	36.04	34.93	sp|P13796|PLSL_HUMAN	Plastin-2 OS=Homo sapiens GN=LCP1 PE=1 SV=6			0	99	FSLVGIGGQDLNEGNR			-0.00101647	1674.83	838.423	1674.83	838.424	2	17	1.1.1.2826.15	1	61.2258	50563.5	61.6327
9	30.63	30.63	36.68	36.04	34.93	sp|P13796|PLSL_HUMAN	Plastin-2 OS=Homo sapiens GN=LCP1 PE=1 SV=6			0	99	FSLVGIGGQDLNEGNR			-0.00077233	1674.83	838.423	1674.83	838.424	2	20	1.1.1.2834.20	1	61.568	55350.2	61.6751
9	30.63	30.63	36.68	36.04	34.93	sp|P13796|PLSL_HUMAN	Plastin-2 OS=Homo sapiens GN=LCP1 PE=1 SV=6			0	99	FSLVGIGGQDLNEGNR			-0.00077233	1674.83	838.423	1674.83	838.424	2	18	1.1.1.2842.15	1	61.9013	55350.2	61.6751
9	30.63	30.63	36.68	36.04	34.93	sp|P13796|PLSL_HUMAN	Plastin-2 OS=Homo sapiens GN=LCP1 PE=1 SV=6			0	99	GDEEGVPAVVIDMSGLR			0.00248774	1742.85	872.434	1742.85	872.433	2	17	1.1.1.3152.13	1	75.0096	40407.2	75.2088
9	30.63	30.63	36.68	36.04	34.93	sp|P13796|PLSL_HUMAN	Plastin-2 OS=Homo sapiens GN=LCP1 PE=1 SV=6			0	83.5	GDEEGVPAVVIDMSGLR	Oxidation(M)@13		-0.00166927	1758.84	880.429	1758.85	880.43	2	8	1.1.1.2768.24	1	58.8029	1920.17	58.8644
9	30.63	30.63	36.68	36.04	34.93	sp|P13796|PLSL_HUMAN	Plastin-2 OS=Homo sapiens GN=LCP1 PE=1 SV=6			0	99	GSVSDEEMMELR	Phospho(S)@2		-0.00119728	1461.55	731.783	1461.55	731.783	2	15	1.1.1.2641.8	1	53.4494	7970.08	53.44
9	30.63	30.63	36.68	36.04	34.93	sp|P13796|PLSL_HUMAN	Plastin-2 OS=Homo sapiens GN=LCP1 PE=1 SV=6			0	99	GSVSDEEMMELR			0.00226378	1381.59	691.801	1381.59	691.8	2	9	1.1.1.2544.8	1	49.3639	957.846	49.2709
9	30.63	30.63	36.68	36.04	34.93	sp|P13796|PLSL_HUMAN	Plastin-2 OS=Homo sapiens GN=LCP1 PE=1 SV=6			0	99	GSVSDEEMMELR	Phospho(S)@4		-0.00144142	1461.55	731.782	1461.55	731.783	2	14	1.1.1.2649.12	1	53.7892	7780.36	53.6922
9	30.63	30.63	36.68	36.04	34.93	sp|P13796|PLSL_HUMAN	Plastin-2 OS=Homo sapiens GN=LCP1 PE=1 SV=6			0	99	GSVSDEEMMELR	Phospho(S)@2		-0.000220716	1461.55	731.783	1461.55	731.783	2	11	1.1.1.2689.14	1	55.4654	2182.52	55.0309
9	30.63	30.63	36.68	36.04	34.93	sp|P13796|PLSL_HUMAN	Plastin-2 OS=Homo sapiens GN=LCP1 PE=1 SV=6			0	99	GSVSDEEMMELR	Phospho(S)@2		0.000389637	1461.55	731.783	1461.55	731.783	2	11	1.1.1.2698.9	1	55.8401	1261.12	55.9137
9	30.63	30.63	36.68	36.04	34.93	sp|P13796|PLSL_HUMAN	Plastin-2 OS=Homo sapiens GN=LCP1 PE=1 SV=6			0	99	GSVSDEEMMELR	Phospho(S)@2		-0.00119728	1461.55	731.783	1461.55	731.783	2	13	1.1.1.2635.15	1	53.2032	7970.08	53.44
9	30.63	30.63	36.68	36.04	34.93	sp|P13796|PLSL_HUMAN	Plastin-2 OS=Homo sapiens GN=LCP1 PE=1 SV=6			0	99	GSVSDEEMMELR	Phospho(S)@4		-0.000220716	1461.55	731.783	1461.55	731.783	2	12	1.1.1.2681.9	1	55.1251	2176.56	55.0309
9	30.63	30.63	36.68	36.04	34.93	sp|P13796|PLSL_HUMAN	Plastin-2 OS=Homo sapiens GN=LCP1 PE=1 SV=6			0	99	GSVSDEEMMELR			-0.0015204	1381.58	691.799	1381.59	691.8	2	11	1.1.1.2490.10	1	47.094	20689.4	47.4202
9	30.63	30.63	36.68	36.04	34.93	sp|P13796|PLSL_HUMAN	Plastin-2 OS=Homo sapiens GN=LCP1 PE=1 SV=6			0	95.72	GSVSDEEMMELR	Phospho(S)@2		-0.00144142	1461.55	731.782	1461.55	731.783	2	8	1.1.1.2693.10	1	55.6308	1392.96	55.6195
9	30.63	30.63	36.68	36.04	34.93	sp|P13796|PLSL_HUMAN	Plastin-2 OS=Homo sapiens GN=LCP1 PE=1 SV=6			0	59.82	GSVSDEEMMELR			0.0127619	1381.6	691.806	1381.59	691.8	2	6	1.1.1.2565.11	1	50.2472	1078.78	50.235
9	30.63	30.63	36.68	36.04	34.93	sp|P13796|PLSL_HUMAN	Plastin-2 OS=Homo sapiens GN=LCP1 PE=1 SV=6			0	90.49	LENCNYAVELGK	Deamidated(N)@3; Carbamidomethyl(C)@4		0.00368844	1409.65	705.834	1409.65	705.832	2	8	1.1.1.2424.19	0	44.3285	1577.23	44.3098
9	30.63	30.63	36.68	36.04	34.93	sp|P13796|PLSL_HUMAN	Plastin-2 OS=Homo sapiens GN=LCP1 PE=1 SV=6			0	99	MINLSVPDTIDER	Oxidation(M)@1		-0.00233074	1517.74	759.876	1517.74	759.877	2	14	1.1.1.2686.11	1	55.3366	4966.56	55.4509
9	30.63	30.63	36.68	36.04	34.93	sp|P13796|PLSL_HUMAN	Plastin-2 OS=Homo sapiens GN=LCP1 PE=1 SV=6			0	99	MINLSVPDTIDER			-0.000430984	1501.74	751.879	1501.74	751.88	2	16	1.1.1.2784.4	1	59.4584	26453.2	59.201
9	30.63	30.63	36.68	36.04	34.93	sp|P13796|PLSL_HUMAN	Plastin-2 OS=Homo sapiens GN=LCP1 PE=1 SV=6			0	99	MINLSVPDTIDER			-0.000186843	1501.74	751.88	1501.74	751.88	2	15	1.1.1.2792.5	1	59.793	20736.4	59.3689
9	30.63	30.63	36.68	36.04	34.93	sp|P13796|PLSL_HUMAN	Plastin-2 OS=Homo sapiens GN=LCP1 PE=1 SV=6			0	99	MINLSVPDTIDER			-0.000797194	1501.74	751.879	1501.74	751.88	2	14	1.1.1.2800.8	1	60.129	12340.8	59.7032
9	30.63	30.63	36.68	36.04	34.93	sp|P13796|PLSL_HUMAN	Plastin-2 OS=Homo sapiens GN=LCP1 PE=1 SV=6			0	99	MINLSVPDTIDER			-0.00336067	1501.74	751.878	1501.74	751.88	2	15	1.1.1.2808.7	1	60.4618	11093.6	60.4953
9	30.63	30.63	36.68	36.04	34.93	sp|P13796|PLSL_HUMAN	Plastin-2 OS=Homo sapiens GN=LCP1 PE=1 SV=6			0	99	MINLSVPDTIDER			-0.000797194	1501.74	751.879	1501.74	751.88	2	14	1.1.1.2816.8	1	60.7977	10703.9	60.7044
9	30.63	30.63	36.68	36.04	34.93	sp|P13796|PLSL_HUMAN	Plastin-2 OS=Homo sapiens GN=LCP1 PE=1 SV=6			0	96.58	MINLSVPDTIDER			-0.000430984	1501.74	751.879	1501.74	751.88	2	11	1.1.1.2787.10	1	59.5912	26762.2	59.201
9	30.63	30.63	36.68	36.04	34.93	sp|P13796|PLSL_HUMAN	Plastin-2 OS=Homo sapiens GN=LCP1 PE=1 SV=6			0	95.85	MINLSVPDTIDER	Oxidation(M)@1		0.00428091	1517.74	759.879	1517.74	759.877	2	8	1.1.1.2788.9	1	59.6297	856.139	59.4944
9	30.63	30.63	36.68	36.04	34.93	sp|P13796|PLSL_HUMAN	Plastin-2 OS=Homo sapiens GN=LCP1 PE=1 SV=6			0	79.6	MINLSVPDTIDER	Deamidated(N)@3		-0.00305052	1502.73	752.37	1502.73	752.372	2	7	1.1.1.2758.13	1	58.3718	2067.75	58.1479
9	30.63	30.63	36.68	36.04	34.93	sp|P13796|PLSL_HUMAN	Plastin-2 OS=Homo sapiens GN=LCP1 PE=1 SV=6			0	58.8	MINLSVPDTIDER	Deamidated(N)@3		-0.00305052	1502.73	752.37	1502.73	752.372	2	8	1.1.1.2750.16	1	58.0375	2067.75	58.1479
9	30.63	30.63	36.68	36.04	34.93	sp|P13796|PLSL_HUMAN	Plastin-2 OS=Homo sapiens GN=LCP1 PE=1 SV=6			0	57.71	MINLSVPDTIDER	Deamidated(N)@3		0.0149426	1502.74	752.379	1502.73	752.372	2	8	1.1.1.2800.9	1	60.1299	4505.48	60.0783
9	30.63	30.63	36.68	36.04	34.93	sp|P13796|PLSL_HUMAN	Plastin-2 OS=Homo sapiens GN=LCP1 PE=1 SV=6			0	99	TENLNDDEKLNNAK		missed K-L@9	-0.000503043	1616.76	809.389	1616.76	809.389	2	17	1.1.1.1848.28	1	20.2048	52110.7	20.0958
9	30.63	30.63	36.68	36.04	34.93	sp|P13796|PLSL_HUMAN	Plastin-2 OS=Homo sapiens GN=LCP1 PE=1 SV=6			0	99	TENLNDDEKLNNAK	Deamidated(N)@11	missed K-L@9	-0.00172771	1617.75	809.88	1617.75	809.881	2	21	1.1.1.1866.29	1	20.9628	16861.5	21.23
9	30.63	30.63	36.68	36.04	34.93	sp|P13796|PLSL_HUMAN	Plastin-2 OS=Homo sapiens GN=LCP1 PE=1 SV=6			0	99	TENLNDDEKLNNAK	Deamidated(N)@12	missed K-L@9	-0.00172771	1617.75	809.88	1617.75	809.881	2	19	1.1.1.1874.29	1	21.2989	16861.5	21.23
9	30.63	30.63	36.68	36.04	34.93	sp|P13796|PLSL_HUMAN	Plastin-2 OS=Homo sapiens GN=LCP1 PE=1 SV=6			0	99	TENLNDDEKLNNAK	Deamidated(N)@12	missed K-L@9	-0.00221599	1617.75	809.88	1617.75	809.881	2	14	1.1.1.1882.31	1	21.6366	8328.22	21.7753
9	30.63	30.63	36.68	36.04	34.93	sp|P13796|PLSL_HUMAN	Plastin-2 OS=Homo sapiens GN=LCP1 PE=1 SV=6			0	99	TENLNDDEKLNNAK		missed K-L@9	0.000803505	1616.77	539.929	1616.76	539.929	3	13	1.1.1.1842.10	1	19.9403	131692	20.1374
9	30.63	30.63	36.68	36.04	34.93	sp|P13796|PLSL_HUMAN	Plastin-2 OS=Homo sapiens GN=LCP1 PE=1 SV=6			0	99	TENLNDDEKLNNAK	Deamidated(N)@5	missed K-L@9	0.00189812	1617.75	540.257	1617.75	540.257	3	13	1.1.1.1859.14	1	20.6554	27989.2	20.6409
9	30.63	30.63	36.68	36.04	34.93	sp|P13796|PLSL_HUMAN	Plastin-2 OS=Homo sapiens GN=LCP1 PE=1 SV=6			0	99	TENLNDDEKLNNAK		missed K-L@9	0.000803505	1616.77	539.929	1616.76	539.929	3	12	1.1.1.1850.8	1	20.2715	131692	20.1374
9	30.63	30.63	36.68	36.04	34.93	sp|P13796|PLSL_HUMAN	Plastin-2 OS=Homo sapiens GN=LCP1 PE=1 SV=6			0	99	TENLNDDEKLNNAK	Deamidated(N)@12	missed K-L@9	0.0013488	1617.75	540.257	1617.75	540.257	3	12	1.1.1.1868.7	1	21.0284	43079.6	21.23
9	30.63	30.63	36.68	36.04	34.93	sp|P13796|PLSL_HUMAN	Plastin-2 OS=Homo sapiens GN=LCP1 PE=1 SV=6			0	99	TENLNDDEKLNNAK	Deamidated(N)@12	missed K-L@9	0.000799486	1617.75	540.257	1617.75	540.257	3	12	1.1.1.1890.3	1	21.9489	19810.2	21.7753
9	30.63	30.63	36.68	36.04	34.93	sp|P13796|PLSL_HUMAN	Plastin-2 OS=Homo sapiens GN=LCP1 PE=1 SV=6			0	98.62	TENLNDDEKLNNAK	Deamidated(N)@5	missed K-L@9	0.0013488	1617.75	540.257	1617.75	540.257	3	11	1.1.1.1879.12	1	21.4947	43079.6	21.23
9	30.63	30.63	36.68	36.04	34.93	sp|P13796|PLSL_HUMAN	Plastin-2 OS=Homo sapiens GN=LCP1 PE=1 SV=6			0	97.32	TENLNDDEKLNNAK	Deamidated(N)@5	missed K-L@9	0.00189812	1617.75	540.257	1617.75	540.257	3	11	1.1.1.1858.9	1	20.6091	27989.2	20.6409
9	30.63	30.63	36.68	36.04	34.93	sp|P13796|PLSL_HUMAN	Plastin-2 OS=Homo sapiens GN=LCP1 PE=1 SV=6			0	74.15	TENLNDDEKLNNAK	Deamidated(N)@12	missed K-L@9	0.000799486	1617.75	540.257	1617.75	540.257	3	8	1.1.1.1898.8	1	22.286	15536.4	21.8588
9	30.63	30.63	36.68	36.04	34.93	sp|P13796|PLSL_HUMAN	Plastin-2 OS=Homo sapiens GN=LCP1 PE=1 SV=6			0	28.87	TENLNDDEKLNNAK		missed K-L@9	0.000986611	1616.77	539.929	1616.76	539.929	3	5	1.1.1.1834.11	1	19.6065	88858.7	20.0128
9	30.63	30.63	36.68	36.04	34.93	sp|P13796|PLSL_HUMAN	Plastin-2 OS=Homo sapiens GN=LCP1 PE=1 SV=6			0	99	VDTDGNGYISFNELNDLFK	Deamidated(N)@6		0.00245455	2160.99	1081.5	2160.99	1081.5	2	18	1.1.1.3230.11	1	78.3266	234426	78.6377
9	30.63	30.63	36.68	36.04	34.93	sp|P13796|PLSL_HUMAN	Plastin-2 OS=Homo sapiens GN=LCP1 PE=1 SV=6			0	99	VDTDGNGYISFNELNDLFK	Deamidated(N)@6		0.00245455	2160.99	1081.5	2160.99	1081.5	2	17	1.1.1.3246.23	1	78.9914	233463	78.6377
9	30.63	30.63	36.68	36.04	34.93	sp|P13796|PLSL_HUMAN	Plastin-2 OS=Homo sapiens GN=LCP1 PE=1 SV=6			0	93.78	VDTDGNGYISFNELNDLFK	Deamidated(N)@6		0.00440767	2160.99	1081.5	2160.99	1081.5	2	11	1.1.1.3297.11	1	81.1566	1025.81	81.0892
9	30.63	30.63	36.68	36.04	34.93	sp|P13796|PLSL_HUMAN	Plastin-2 OS=Homo sapiens GN=LCP1 PE=1 SV=6			0	85.08	VDTDGNGYISFNELNDLFK	Deamidated(N)@6		-0.000963417	2160.98	1081.5	2160.99	1081.5	2	7	1.1.1.3307.37	1	81.5811	1044.22	81.5042
9	30.63	30.63	36.68	36.04	34.93	sp|P13796|PLSL_HUMAN	Plastin-2 OS=Homo sapiens GN=LCP1 PE=1 SV=6			0	79.06	VDTDGNGYISFNELNDLFK	Deamidated(N)@6		-0.000475136	2160.99	1081.5	2160.99	1081.5	2	8	1.1.1.3283.33	1	80.5656	1558.02	80.5774
9	30.63	30.63	36.68	36.04	34.93	sp|P13796|PLSL_HUMAN	Plastin-2 OS=Homo sapiens GN=LCP1 PE=1 SV=6			0	16.75	VDTDGNGYISFNELNDLFK	Deamidated(N)@6		-0.000719277	2160.99	1081.5	2160.99	1081.5	2	8	1.1.1.3273.33	1	80.139	5528.42	79.8529
9	30.63	30.63	36.68	36.04	34.93	sp|P13796|PLSL_HUMAN	Plastin-2 OS=Homo sapiens GN=LCP1 PE=1 SV=6			0	96.09	VNDDIIVNWVNETLR	Deamidated(N)@2		-0.00387737	1799.9	900.958	1799.91	900.96	2	8	1.1.1.3267.15	1	79.8687	454.789	79.8529
9	30.63	30.63	36.68	36.04	34.93	sp|P13796|PLSL_HUMAN	Plastin-2 OS=Homo sapiens GN=LCP1 PE=1 SV=6			0	99	VREITENLMATGDLDQDGR	Deamidated(N)@7	missed R-E@2	0.018086	2133.02	712.014	2133	712.008	3	11	1.1.1.2587.10	1	51.1762	2603.69	51.0378
9	30.63	30.63	36.68	36.04	34.93	sp|P13796|PLSL_HUMAN	Plastin-2 OS=Homo sapiens GN=LCP1 PE=1 SV=6			0	99	VYALPEDLVEVNPK			-0.00114597	1584.84	793.427	1584.84	793.427	2	11	1.1.1.2895.13	1	64.1381	18339.3	64.5479
9	30.63	30.63	36.68	36.04	34.93	sp|P13796|PLSL_HUMAN	Plastin-2 OS=Homo sapiens GN=LCP1 PE=1 SV=6			0	99	VYALPEDLVEVNPK			-0.00151219	1584.84	793.427	1584.84	793.427	2	14	1.1.1.2919.13	1	65.1544	11988.1	64.7171
9	30.63	30.63	36.68	36.04	34.93	sp|P13796|PLSL_HUMAN	Plastin-2 OS=Homo sapiens GN=LCP1 PE=1 SV=6			0	99	VYALPEDLVEVNPK			-0.00151219	1584.84	793.427	1584.84	793.427	2	14	1.1.1.2903.13	1	64.4771	19826.6	64.5479
9	30.63	30.63	36.68	36.04	34.93	sp|P13796|PLSL_HUMAN	Plastin-2 OS=Homo sapiens GN=LCP1 PE=1 SV=6			0	85.05	VYALPEDLVEVNPK			-0.00151219	1584.84	793.427	1584.84	793.427	2	10	1.1.1.2907.10	1	64.644	19826.6	64.5479
9	30.63	30.63	36.68	36.04	34.93	sp|P13796|PLSL_HUMAN	Plastin-2 OS=Homo sapiens GN=LCP1 PE=1 SV=6			0	59.35	VYALPEDLVEVNPK			-0.00175633	1584.84	793.426	1584.84	793.427	2	9	1.1.1.2916.12	1	65.0263	18679.3	64.5902
9	30.63	30.63	36.68	36.04	34.93	sp|P13796|PLSL_HUMAN	Plastin-2 OS=Homo sapiens GN=LCP1 PE=1 SV=6			0	99	YPALHKPENQDIDWGALEGETR			0.00295779	2538.22	635.562	2538.21	635.561	4	10	1.1.1.2701.7	1	55.9639	20743.7	55.7461
10	25.06	25.06	28.87	20.79	20.79	sp|O43719|HTSF1_HUMAN	HIV Tat-specific factor 1 OS=Homo sapiens GN=HTATSF1 PE=1 SV=1			2	99	DPEEADYCIQTLDGR	Carbamidomethyl(C)@8		0.00279878	1780.76	891.387	1780.76	891.386	2	18	1.1.1.2587.21	1	51.1853	3894.68	51.1648
10	25.06	25.06	28.87	20.79	20.79	sp|O43719|HTSF1_HUMAN	HIV Tat-specific factor 1 OS=Homo sapiens GN=HTATSF1 PE=1 SV=1			2	99	EAEEGCPEKESEEGCPK	Carbamidomethyl(C)@6; Carbamidomethyl(C)@15	missed K-E@9	-0.00215779	1963.78	655.599	1963.78	655.6	3	12	1.1.1.1714.6	1	14.6106	10094.6	14.7587
10	25.06	25.06	28.87	20.79	20.79	sp|O43719|HTSF1_HUMAN	HIV Tat-specific factor 1 OS=Homo sapiens GN=HTATSF1 PE=1 SV=1			2	99	EAEEGCPEKESEEGCPKR	Carbamidomethyl(C)@6; Carbamidomethyl(C)@15	missed K-E@9; missed K-R@17	-0.0021155	2119.88	707.633	2119.88	707.633	3	12	1.1.1.1669.9	1	12.7502	1333.1	12.9741
10	25.06	25.06	28.87	20.79	20.79	sp|O43719|HTSF1_HUMAN	HIV Tat-specific factor 1 OS=Homo sapiens GN=HTATSF1 PE=1 SV=1			2	99	ESSPEKEAEEGCPEKESEEGCPK	Carbamidomethyl(C)@12; Carbamidomethyl(C)@21	missed K-E@6; missed K-E@15	0.00305151	2621.08	874.7	2621.07	874.699	3	12	1.1.1.1912.37	1	22.8968	6668.96	22.8634
10	25.06	25.06	28.87	20.79	20.79	sp|O43719|HTSF1_HUMAN	HIV Tat-specific factor 1 OS=Homo sapiens GN=HTATSF1 PE=1 SV=1			2	99	LFDEEEDSSEK			0.00670231	1326.55	664.284	1326.55	664.28	2	11	1.1.1.2043.16	1	28.349	1326.52	28.2462
10	25.06	25.06	28.87	20.79	20.79	sp|O43719|HTSF1_HUMAN	HIV Tat-specific factor 1 OS=Homo sapiens GN=HTATSF1 PE=1 SV=1			2	99	LLDEDEIR			-0.0018186	1001.5	501.758	1001.5	501.759	2	9	1.1.1.2248.5	1	36.9252	17850.6	36.5811
10	25.06	25.06	28.87	20.79	20.79	sp|O43719|HTSF1_HUMAN	HIV Tat-specific factor 1 OS=Homo sapiens GN=HTATSF1 PE=1 SV=1			2	99	MNAQETATGMAFEEPIDEK			-0.00132679	2110.92	1056.47	2110.92	1056.47	2	16	1.1.1.2680.28	1	55.099	7167.34	55.0309
10	25.06	25.06	28.87	20.79	20.79	sp|O43719|HTSF1_HUMAN	HIV Tat-specific factor 1 OS=Homo sapiens GN=HTATSF1 PE=1 SV=1			2	99	NMFHPMDFEDDPLVLNEIR	Deamidated(N)@1		-0.000621603	2332.05	778.357	2332.05	778.357	3	12	1.1.1.3214.5	1	77.6359	1444.61	77.6711
10	25.06	25.06	28.87	20.79	20.79	sp|O43719|HTSF1_HUMAN	HIV Tat-specific factor 1 OS=Homo sapiens GN=HTATSF1 PE=1 SV=1			2	99	TAEEPPQEKAPEPTDAR		missed K-A@9	-0.0027195	1864.88	933.446	1864.88	933.447	2	11	1.1.1.1864.39	1	20.8871	583.447	20.9359
10	25.06	25.06	28.87	20.79	20.79	sp|O43719|HTSF1_HUMAN	HIV Tat-specific factor 1 OS=Homo sapiens GN=HTATSF1 PE=1 SV=1			2	99	TEDGGEFEEGASENNAK			-0.00123116	1782.72	892.366	1782.72	892.366	2	21	1.1.1.1954.33	1	24.6507	22590.1	24.7449
10	25.06	25.06	28.87	20.79	20.79	sp|O43719|HTSF1_HUMAN	HIV Tat-specific factor 1 OS=Homo sapiens GN=HTATSF1 PE=1 SV=1			2	99	VFDDESDEKEDEEYADEK	Phospho(S)@6	missed K-E@9	0.000974618	2270.83	1136.42	2270.83	1136.42	2	12	1.1.1.2282.36	1	38.378	3401.81	38.5098
10	25.06	25.06	28.87	20.79	20.79	sp|O43719|HTSF1_HUMAN	HIV Tat-specific factor 1 OS=Homo sapiens GN=HTATSF1 PE=1 SV=1			1.88606	98.77	ESSPEKEAEEGCPEK	Carbamidomethyl(C)@12	missed K-E@6	0.00281928	1704.72	853.366	1704.71	853.365	2	8	1.1.1.1799.31	1	18.1523	620.663	18.4578
10	25.06	25.06	28.87	20.79	20.79	sp|O43719|HTSF1_HUMAN	HIV Tat-specific factor 1 OS=Homo sapiens GN=HTATSF1 PE=1 SV=1			0.954677	97.3	EFEENGLEK	Deamidated(N)@5		-0.000452774	1094.48	548.245	1094.48	548.246	2	9	1.1.1.2101.7	1	30.7611	18692.2	30.4574
10	25.06	25.06	28.87	20.79	20.79	sp|O43719|HTSF1_HUMAN	HIV Tat-specific factor 1 OS=Homo sapiens GN=HTATSF1 PE=1 SV=1			0.220404	41.25	DLDEEGSEKELHENVLDK	Phospho(S)@7	missed K-E@9	0.00412985	2177.94	726.987	2177.94	726.986	3	7	1.1.1.2332.17	1	40.4636	3065.82	40.6152
10	25.06	25.06	28.87	20.79	20.79	sp|O43719|HTSF1_HUMAN	HIV Tat-specific factor 1 OS=Homo sapiens GN=HTATSF1 PE=1 SV=1			0	98.7	DPEEADYCIQTLDGR	Carbamidomethyl(C)@8		-0.00147369	1780.76	891.385	1780.76	891.386	2	11	1.1.1.2598.26	1	51.655	9222.83	51.334
10	25.06	25.06	28.87	20.79	20.79	sp|O43719|HTSF1_HUMAN	HIV Tat-specific factor 1 OS=Homo sapiens GN=HTATSF1 PE=1 SV=1			0	99	EAEEGCPEKESEEGCPKR	Carbamidomethyl(C)@6; Carbamidomethyl(C)@15	missed K-E@9; missed K-R@17	-0.0021155	2119.88	707.633	2119.88	707.633	3	11	1.1.1.1677.9	1	13.0785	1333.1	12.9741
10	25.06	25.06	28.87	20.79	20.79	sp|O43719|HTSF1_HUMAN	HIV Tat-specific factor 1 OS=Homo sapiens GN=HTATSF1 PE=1 SV=1			0	85.06	EFEENGLEK	Deamidated(N)@5		0.00137828	1094.48	548.246	1094.48	548.246	2	10	1.1.1.2003.7	1	26.673	50380.7	26.5819
10	25.06	25.06	28.87	20.79	20.79	sp|O43719|HTSF1_HUMAN	HIV Tat-specific factor 1 OS=Homo sapiens GN=HTATSF1 PE=1 SV=1			0	81.33	EFEENGLEK	Deamidated(N)@5		0.00137828	1094.48	548.246	1094.48	548.246	2	9	1.1.1.1995.7	1	26.3396	50380.7	26.5819
10	25.06	25.06	28.87	20.79	20.79	sp|O43719|HTSF1_HUMAN	HIV Tat-specific factor 1 OS=Homo sapiens GN=HTATSF1 PE=1 SV=1			0	75.23	EFEENGLEK	Deamidated(N)@5		0.00137828	1094.48	548.246	1094.48	548.246	2	8	1.1.1.2011.7	1	27.0049	50781	26.5819
10	25.06	25.06	28.87	20.79	20.79	sp|O43719|HTSF1_HUMAN	HIV Tat-specific factor 1 OS=Homo sapiens GN=HTATSF1 PE=1 SV=1			0	46.06	EFEENGLEK	Deamidated(N)@5		-0.000452774	1094.48	548.245	1094.48	548.246	2	9	1.1.1.2093.7	1	30.4239	18692.2	30.4574
10	25.06	25.06	28.87	20.79	20.79	sp|O43719|HTSF1_HUMAN	HIV Tat-specific factor 1 OS=Homo sapiens GN=HTATSF1 PE=1 SV=1			0	45.37	EFEENGLEK	Deamidated(N)@5		0.00076793	1094.48	548.246	1094.48	548.246	2	9	1.1.1.2069.4	1	29.4125	16632	29.5731
10	25.06	25.06	28.87	20.79	20.79	sp|O43719|HTSF1_HUMAN	HIV Tat-specific factor 1 OS=Homo sapiens GN=HTATSF1 PE=1 SV=1			0	83.35	ESSPEKEAEEGCPEK	Phospho(S)@3; Carbamidomethyl(C)@12	missed K-E@6	0.00827757	1784.69	893.352	1784.68	893.348	2	7	1.1.1.1863.39	1	20.8449	1423.16	20.8939
10	25.06	25.06	28.87	20.79	20.79	sp|O43719|HTSF1_HUMAN	HIV Tat-specific factor 1 OS=Homo sapiens GN=HTATSF1 PE=1 SV=1			0	96.65	ESSPEKEAEEGCPEKESEEGCPK	Carbamidomethyl(C)@12; Carbamidomethyl(C)@21	missed K-E@6; missed K-E@15	0.00268529	2621.08	874.7	2621.07	874.699	3	8	1.1.1.1904.34	1	22.5592	6651.08	22.8634
10	25.06	25.06	28.87	20.79	20.79	sp|O43719|HTSF1_HUMAN	HIV Tat-specific factor 1 OS=Homo sapiens GN=HTATSF1 PE=1 SV=1			0	99	LLDEDEIR			-0.0018186	1001.5	501.758	1001.5	501.759	2	10	1.1.1.2240.5	1	36.5881	17850.6	36.5811
10	25.06	25.06	28.87	20.79	20.79	sp|O43719|HTSF1_HUMAN	HIV Tat-specific factor 1 OS=Homo sapiens GN=HTATSF1 PE=1 SV=1			0	79.06	LLDEDEIR			-0.0018186	1001.5	501.758	1001.5	501.759	2	6	1.1.1.2232.2	0	36.2508	17692	36.5811
10	25.06	25.06	28.87	20.79	20.79	sp|O43719|HTSF1_HUMAN	HIV Tat-specific factor 1 OS=Homo sapiens GN=HTATSF1 PE=1 SV=1			0	98.36	MNAQETATGMAFEEPIDEK			-0.00083851	2110.92	1056.47	2110.92	1056.47	2	11	1.1.1.2672.28	1	54.766	7151.56	54.9891
10	25.06	25.06	28.87	20.79	20.79	sp|O43719|HTSF1_HUMAN	HIV Tat-specific factor 1 OS=Homo sapiens GN=HTATSF1 PE=1 SV=1			0	82.15	TAEEPPQEKAPEPTDAR	Deamidated(Q)@7	missed K-A@9	-0.00320239	1865.86	622.961	1865.86	622.962	3	7	1.1.1.1910.18	1	22.7973	712.9	22.7796
10	25.06	25.06	28.87	20.79	20.79	sp|O43719|HTSF1_HUMAN	HIV Tat-specific factor 1 OS=Homo sapiens GN=HTATSF1 PE=1 SV=1			0	99	TEDGGEFEEGASENNAK			-0.00123116	1782.72	892.366	1782.72	892.366	2	17	1.1.1.1962.41	1	24.9919	22590.1	24.7449
10	25.06	25.06	28.87	20.79	20.79	sp|O43719|HTSF1_HUMAN	HIV Tat-specific factor 1 OS=Homo sapiens GN=HTATSF1 PE=1 SV=1			0	99	TEDGGEFEEGASENNAK			-0.000254592	1782.72	892.366	1782.72	892.366	2	16	1.1.1.1971.22	1	25.3667	9489.46	24.913
10	25.06	25.06	28.87	20.79	20.79	sp|O43719|HTSF1_HUMAN	HIV Tat-specific factor 1 OS=Homo sapiens GN=HTATSF1 PE=1 SV=1			0	99	TEDGGEFEEGASENNAK			0.000844041	1782.72	892.367	1782.72	892.366	2	13	1.1.1.1987.32	1	26.031	1072.19	25.9979
10	25.06	25.06	28.87	20.79	20.79	sp|O43719|HTSF1_HUMAN	HIV Tat-specific factor 1 OS=Homo sapiens GN=HTATSF1 PE=1 SV=1			0	99	TEDGGEFEEGASENNAK	Deamidated(N)@15		0.00657542	1783.71	892.862	1783.7	892.858	2	15	1.1.1.1983.21	1	25.8633	1884.71	25.7905
10	25.06	25.06	28.87	20.79	20.79	sp|O43719|HTSF1_HUMAN	HIV Tat-specific factor 1 OS=Homo sapiens GN=HTATSF1 PE=1 SV=1			0	99	TEDGGEFEEGASENNAK			-0.00123116	1782.72	892.366	1782.72	892.366	2	12	1.1.1.1946.27	1	24.3183	19693.2	24.7029
10	25.06	25.06	28.87	20.79	20.79	sp|O43719|HTSF1_HUMAN	HIV Tat-specific factor 1 OS=Homo sapiens GN=HTATSF1 PE=1 SV=1			0	99	TEDGGEFEEGASENNAK	Deamidated(N)@14		0.0115803	1783.71	892.864	1783.7	892.858	2	13	1.1.1.1968.38	1	25.242	7971.96	24.7868
10	25.06	25.06	28.87	20.79	20.79	sp|O43719|HTSF1_HUMAN	HIV Tat-specific factor 1 OS=Homo sapiens GN=HTATSF1 PE=1 SV=1			0	64.51	VFDDESDEKEDEEYADEK	Phospho(S)@6	missed K-E@9	0.000974618	2270.83	1136.42	2270.83	1136.42	2	10	1.1.1.2290.36	1	38.7125	3401.81	38.5098
11	24.8	24.8	6.691	2.331	2.213	tr|H3BQK9|H3BQK9_HUMAN; tr|H3BPE1|H3BPE1_HUMAN	Microtubule-actin cross-linking factor 1, isoforms 1/2/3/5 OS=Homo sapiens GN=MACF1 PE=2 SV=1; Microtubule-actin cross-linking factor 1, isoforms 1/2/3/5 OS=Homo sapiens GN=MACF1 PE=2 SV=1			2	99	AGNELLESSAGDDASSLR			-0.00236197	1790.83	896.42	1790.83	896.421	2	17	1.1.1.2457.26	1	45.7205	4826.82	45.9061
11	24.8	24.8	6.691	2.331	2.213	tr|H3BQK9|H3BQK9_HUMAN; tr|H3BPE1|H3BPE1_HUMAN	Microtubule-actin cross-linking factor 1, isoforms 1/2/3/5 OS=Homo sapiens GN=MACF1 PE=2 SV=1; Microtubule-actin cross-linking factor 1, isoforms 1/2/3/5 OS=Homo sapiens GN=MACF1 PE=2 SV=1			2	99	DIMEIEGEPAPDHR			-0.00119331	1607.72	804.869	1607.72	804.87	2	11	1.1.1.2372.25	1	42.1438	1843.25	42.0784
11	24.8	24.8	6.691	2.331	2.213	tr|H3BQK9|H3BQK9_HUMAN; tr|H3BPE1|H3BPE1_HUMAN	Microtubule-actin cross-linking factor 1, isoforms 1/2/3/5 OS=Homo sapiens GN=MACF1 PE=2 SV=1; Microtubule-actin cross-linking factor 1, isoforms 1/2/3/5 OS=Homo sapiens GN=MACF1 PE=2 SV=1			2	99	DQEPIPQNIDR			0.000227235	1323.64	662.828	1323.64	662.828	2	10	1.1.1.2165.15	1	33.4503	5076.07	33.6026
11	24.8	24.8	6.691	2.331	2.213	tr|H3BQK9|H3BQK9_HUMAN; tr|H3BPE1|H3BPE1_HUMAN	Microtubule-actin cross-linking factor 1, isoforms 1/2/3/5 OS=Homo sapiens GN=MACF1 PE=2 SV=1; Microtubule-actin cross-linking factor 1, isoforms 1/2/3/5 OS=Homo sapiens GN=MACF1 PE=2 SV=1			2	99	DTDSLQSQIEDVR			-0.00397133	1504.7	753.356	1504.7	753.358	2	15	1.1.1.2578.16	1	50.8	5126.45	50.7416
11	24.8	24.8	6.691	2.331	2.213	tr|H3BQK9|H3BQK9_HUMAN; tr|H3BPE1|H3BPE1_HUMAN	Microtubule-actin cross-linking factor 1, isoforms 1/2/3/5 OS=Homo sapiens GN=MACF1 PE=2 SV=1; Microtubule-actin cross-linking factor 1, isoforms 1/2/3/5 OS=Homo sapiens GN=MACF1 PE=2 SV=1			2	99	ELEEAVTSALQQETEK			-0.00486616	1803.87	902.942	1803.87	902.944	2	10	1.1.1.2872.22	1	63.1715	4002.3	63.5736
11	24.8	24.8	6.691	2.331	2.213	tr|H3BQK9|H3BQK9_HUMAN; tr|H3BPE1|H3BPE1_HUMAN	Microtubule-actin cross-linking factor 1, isoforms 1/2/3/5 OS=Homo sapiens GN=MACF1 PE=2 SV=1; Microtubule-actin cross-linking factor 1, isoforms 1/2/3/5 OS=Homo sapiens GN=MACF1 PE=2 SV=1			2	99	ELNPEEGEMVEEK			0.002354	1531.67	766.844	1531.67	766.843	2	12	1.1.1.2255.28	1	37.2396	7322.3	37.2555
11	24.8	24.8	6.691	2.331	2.213	tr|H3BQK9|H3BQK9_HUMAN; tr|H3BPE1|H3BPE1_HUMAN	Microtubule-actin cross-linking factor 1, isoforms 1/2/3/5 OS=Homo sapiens GN=MACF1 PE=2 SV=1; Microtubule-actin cross-linking factor 1, isoforms 1/2/3/5 OS=Homo sapiens GN=MACF1 PE=2 SV=1			2	99	EQYEALQEETR			-0.00358401	1394.63	698.321	1394.63	698.323	2	9	1.1.1.2105.24	1	30.9429	2538.75	31.1299
11	24.8	24.8	6.691	2.331	2.213	tr|H3BQK9|H3BQK9_HUMAN; tr|H3BPE1|H3BPE1_HUMAN	Microtubule-actin cross-linking factor 1, isoforms 1/2/3/5 OS=Homo sapiens GN=MACF1 PE=2 SV=1; Microtubule-actin cross-linking factor 1, isoforms 1/2/3/5 OS=Homo sapiens GN=MACF1 PE=2 SV=1			2	99	LLDAEDVDVPSPDEK			-5.80932e-05	1640.78	821.396	1640.78	821.396	2	13	1.1.1.2549.26	1	49.5881	9152.11	49.9823
11	24.8	24.8	6.691	2.331	2.213	tr|H3BQK9|H3BQK9_HUMAN; tr|H3BPE1|H3BPE1_HUMAN	Microtubule-actin cross-linking factor 1, isoforms 1/2/3/5 OS=Homo sapiens GN=MACF1 PE=2 SV=1; Microtubule-actin cross-linking factor 1, isoforms 1/2/3/5 OS=Homo sapiens GN=MACF1 PE=2 SV=1			2	99	NDECVLEDNSQR	Carbamidomethyl(C)@4		0.010353	1477.62	739.818	1477.61	739.812	2	8	1.1.1.1978.31	1	25.652	1154.1	25.749
11	24.8	24.8	6.691	2.331	2.213	tr|H3BQK9|H3BQK9_HUMAN; tr|H3BPE1|H3BPE1_HUMAN	Microtubule-actin cross-linking factor 1, isoforms 1/2/3/5 OS=Homo sapiens GN=MACF1 PE=2 SV=1; Microtubule-actin cross-linking factor 1, isoforms 1/2/3/5 OS=Homo sapiens GN=MACF1 PE=2 SV=1			2	99	QSELESIQEVLGDYR			0.00354133	1764.86	883.436	1764.85	883.434	2	11	1.1.1.3178.11	1	76.1137	1061	76.1865
11	24.8	24.8	6.691	2.331	2.213	tr|H3BQK9|H3BQK9_HUMAN; tr|H3BPE1|H3BPE1_HUMAN	Microtubule-actin cross-linking factor 1, isoforms 1/2/3/5 OS=Homo sapiens GN=MACF1 PE=2 SV=1; Microtubule-actin cross-linking factor 1, isoforms 1/2/3/5 OS=Homo sapiens GN=MACF1 PE=2 SV=1			2	99	VPEGGEGISATEVDSR			-0.00240161	1601.75	801.883	1601.75	801.884	2	13	1.1.1.2172.25	1	33.7508	2449.96	34.0192
11	24.8	24.8	6.691	2.331	2.213	tr|H3BQK9|H3BQK9_HUMAN; tr|H3BPE1|H3BPE1_HUMAN	Microtubule-actin cross-linking factor 1, isoforms 1/2/3/5 OS=Homo sapiens GN=MACF1 PE=2 SV=1; Microtubule-actin cross-linking factor 1, isoforms 1/2/3/5 OS=Homo sapiens GN=MACF1 PE=2 SV=1			1.95861	98.97	DQIIELDQTGNQLK			-0.00373591	1613.82	807.918	1613.83	807.92	2	9	1.1.1.2588.19	1	51.226	1560.29	51.2918
11	24.8	24.8	6.691	2.331	2.213	tr|H3BQK9|H3BQK9_HUMAN; tr|H3BPE1|H3BPE1_HUMAN	Microtubule-actin cross-linking factor 1, isoforms 1/2/3/5 OS=Homo sapiens GN=MACF1 PE=2 SV=1; Microtubule-actin cross-linking factor 1, isoforms 1/2/3/5 OS=Homo sapiens GN=MACF1 PE=2 SV=1			0.651695	78.74	DLQDDIQNR			-0.00268643	1115.52	558.766	1115.52	558.768	2	9	1.1.1.2191.11	1	34.5325	6417.75	34.3952
11	24.8	24.8	6.691	2.331	2.213	tr|H3BQK9|H3BQK9_HUMAN; tr|H3BPE1|H3BPE1_HUMAN	Microtubule-actin cross-linking factor 1, isoforms 1/2/3/5 OS=Homo sapiens GN=MACF1 PE=2 SV=1; Microtubule-actin cross-linking factor 1, isoforms 1/2/3/5 OS=Homo sapiens GN=MACF1 PE=2 SV=1			0	60.68	DQEPIPQNIDR			0.000227235	1323.64	662.828	1323.64	662.828	2	8	1.1.1.2173.13	1	33.7824	5076.07	33.6026
11	24.8	24.8	6.691	2.331	2.213	tr|H3BQK9|H3BQK9_HUMAN; tr|H3BPE1|H3BPE1_HUMAN	Microtubule-actin cross-linking factor 1, isoforms 1/2/3/5 OS=Homo sapiens GN=MACF1 PE=2 SV=1; Microtubule-actin cross-linking factor 1, isoforms 1/2/3/5 OS=Homo sapiens GN=MACF1 PE=2 SV=1			0	94.92	DTDSLQSQIEDVR			-0.00421547	1504.7	753.355	1504.7	753.358	2	9	1.1.1.2586.14	1	51.1372	5232.46	50.6995
11	24.8	24.8	6.691	2.331	2.213	tr|H3BQK9|H3BQK9_HUMAN; tr|H3BPE1|H3BPE1_HUMAN	Microtubule-actin cross-linking factor 1, isoforms 1/2/3/5 OS=Homo sapiens GN=MACF1 PE=2 SV=1; Microtubule-actin cross-linking factor 1, isoforms 1/2/3/5 OS=Homo sapiens GN=MACF1 PE=2 SV=1			0	99	EQYEALQEETR			-0.00358401	1394.63	698.321	1394.63	698.323	2	10	1.1.1.2113.17	1	31.2714	2538.75	31.1299
11	24.8	24.8	6.691	2.331	2.213	tr|H3BQK9|H3BQK9_HUMAN; tr|H3BPE1|H3BPE1_HUMAN	Microtubule-actin cross-linking factor 1, isoforms 1/2/3/5 OS=Homo sapiens GN=MACF1 PE=2 SV=1; Microtubule-actin cross-linking factor 1, isoforms 1/2/3/5 OS=Homo sapiens GN=MACF1 PE=2 SV=1			0	99	LLDAEDVDVPSPDEK			0.00274953	1640.78	821.398	1640.78	821.396	2	19	1.1.1.2557.25	1	49.9221	9905.13	49.9823
11	24.8	24.8	6.691	2.331	2.213	tr|H3BQK9|H3BQK9_HUMAN; tr|H3BPE1|H3BPE1_HUMAN	Microtubule-actin cross-linking factor 1, isoforms 1/2/3/5 OS=Homo sapiens GN=MACF1 PE=2 SV=1; Microtubule-actin cross-linking factor 1, isoforms 1/2/3/5 OS=Homo sapiens GN=MACF1 PE=2 SV=1			0	99	LLDAEDVDVPSPDEK			0.00274953	1640.78	821.398	1640.78	821.396	2	18	1.1.1.2565.23	1	50.2572	9905.13	49.9823
11	24.8	24.8	6.691	2.331	2.213	tr|H3BQK9|H3BQK9_HUMAN; tr|H3BPE1|H3BPE1_HUMAN	Microtubule-actin cross-linking factor 1, isoforms 1/2/3/5 OS=Homo sapiens GN=MACF1 PE=2 SV=1; Microtubule-actin cross-linking factor 1, isoforms 1/2/3/5 OS=Homo sapiens GN=MACF1 PE=2 SV=1			0	55.36	LLDAEDVDVPSPDEK			0.0037261	1640.78	821.398	1640.78	821.396	2	8	1.1.1.2573.25	1	50.5965	1639.38	50.4463
12	24.75	24.75	11.43	7.557	7.557	tr|Q5HY54|Q5HY54_HUMAN; sp|P21333|FLNA_HUMAN	Filamin-A OS=Homo sapiens GN=FLNA PE=2 SV=1; Filamin-A OS=Homo sapiens GN=FLNA PE=1 SV=4			2	99	CSGPGLSPGMVR	Carbamidomethyl(C)@1; Phospho(S)@7		0.0025214	1296.54	649.276	1296.54	649.275	2	12	1.1.1.2394.13	1	43.0619	9138.19	42.8374
12	24.75	24.75	11.43	7.557	7.557	tr|Q5HY54|Q5HY54_HUMAN; sp|P21333|FLNA_HUMAN	Filamin-A OS=Homo sapiens GN=FLNA PE=2 SV=1; Filamin-A OS=Homo sapiens GN=FLNA PE=1 SV=4			2	99	DAGEGGLSLAIEGPSK			-0.0151664	1499.73	750.873	1499.75	750.881	2	12	1.1.1.2687.15	1	55.3819	1553.62	55.5352
12	24.75	24.75	11.43	7.557	7.557	tr|Q5HY54|Q5HY54_HUMAN; sp|P21333|FLNA_HUMAN	Filamin-A OS=Homo sapiens GN=FLNA PE=2 SV=1; Filamin-A OS=Homo sapiens GN=FLNA PE=1 SV=4			2	99	DAGEGLLAVQITDPEGKPK			-0.000768311	1937.01	969.512	1937.01	969.513	2	14	1.1.1.2705.24	1	56.1462	5079.94	56.46
12	24.75	24.75	11.43	7.557	7.557	tr|Q5HY54|Q5HY54_HUMAN; sp|P21333|FLNA_HUMAN	Filamin-A OS=Homo sapiens GN=FLNA PE=2 SV=1; Filamin-A OS=Homo sapiens GN=FLNA PE=1 SV=4			2	99	DLAEDAPWK			-0.000754745	1043.49	522.753	1043.49	522.753	2	8	1.1.1.2540.2	0	49.1913	4874.41	49.1451
12	24.75	24.75	11.43	7.557	7.557	tr|Q5HY54|Q5HY54_HUMAN; sp|P21333|FLNA_HUMAN	Filamin-A OS=Homo sapiens GN=FLNA PE=2 SV=1; Filamin-A OS=Homo sapiens GN=FLNA PE=1 SV=4			2	99	EATTEFSVDAR			0.000264344	1224.56	613.288	1224.56	613.288	2	10	1.1.1.2182.14	1	34.1586	4065	33.9359
12	24.75	24.75	11.43	7.557	7.557	tr|Q5HY54|Q5HY54_HUMAN; sp|P21333|FLNA_HUMAN	Filamin-A OS=Homo sapiens GN=FLNA PE=2 SV=1; Filamin-A OS=Homo sapiens GN=FLNA PE=1 SV=4			2	99	EGPYSISVLYGDEEVPR			0.00156629	1908.91	955.463	1908.91	955.463	2	10	1.1.1.2956.24	1	66.7242	1519.23	66.531
12	24.75	24.75	11.43	7.557	7.557	tr|Q5HY54|Q5HY54_HUMAN; sp|P21333|FLNA_HUMAN	Filamin-A OS=Homo sapiens GN=FLNA PE=2 SV=1; Filamin-A OS=Homo sapiens GN=FLNA PE=1 SV=4			2	99	IECDDKGDGSCDVR	Carbamidomethyl(C)@3; Carbamidomethyl(C)@11	missed K-G@6	-0.000307629	1624.65	813.33	1624.65	813.33	2	7	1.1.1.1688.19	1	13.5407	98.0514	13.5508
12	24.75	24.75	11.43	7.557	7.557	tr|Q5HY54|Q5HY54_HUMAN; sp|P21333|FLNA_HUMAN	Filamin-A OS=Homo sapiens GN=FLNA PE=2 SV=1; Filamin-A OS=Homo sapiens GN=FLNA PE=1 SV=4			2	99	MDCQECPEGYR	Carbamidomethyl(C)@3; Carbamidomethyl(C)@6		-0.0020188	1443.52	722.767	1443.52	722.768	2	14	1.1.1.1943.25	1	24.1826	12796.6	24.0749
12	24.75	24.75	11.43	7.557	7.557	tr|Q5HY54|Q5HY54_HUMAN; sp|P21333|FLNA_HUMAN	Filamin-A OS=Homo sapiens GN=FLNA PE=2 SV=1; Filamin-A OS=Homo sapiens GN=FLNA PE=1 SV=4			2	99	VANPSGNLTETYVQDR			-0.00230117	1762.85	882.43	1762.85	882.432	2	16	1.1.1.2365.29	1	41.8543	4992.22	41.8276
12	24.75	24.75	11.43	7.557	7.557	tr|Q5HY54|Q5HY54_HUMAN; sp|P21333|FLNA_HUMAN	Filamin-A OS=Homo sapiens GN=FLNA PE=2 SV=1; Filamin-A OS=Homo sapiens GN=FLNA PE=1 SV=4			2	99	VQVQDNEGCPVEALVK	Carbamidomethyl(C)@9		-0.00360329	1783.87	892.944	1783.88	892.946	2	12	1.1.1.2538.22	1	49.1241	3656.31	49.1031
12	24.75	24.75	11.43	7.557	7.557	tr|Q5HY54|Q5HY54_HUMAN; sp|P21333|FLNA_HUMAN	Filamin-A OS=Homo sapiens GN=FLNA PE=2 SV=1; Filamin-A OS=Homo sapiens GN=FLNA PE=1 SV=4			1.74473	98.27	EEGPYEVEVTYDGVPVPGSPFPLEAVAPTKPSK			0.00671974	3484.74	1162.59	3484.73	1162.58	3	12	1.1.1.3144.22	1	74.6794	2137.32	74.6979
12	24.75	24.75	11.43	7.557	7.557	tr|Q5HY54|Q5HY54_HUMAN; sp|P21333|FLNA_HUMAN	Filamin-A OS=Homo sapiens GN=FLNA PE=2 SV=1; Filamin-A OS=Homo sapiens GN=FLNA PE=1 SV=4			1.4318	99	IANLQTDLSDGLR	Deamidated(N)@3		-0.0110075	1415.71	708.865	1415.73	708.87	2	10	1.1.1.2711.5	1	56.3827	38293.3	56.6713
12	24.75	24.75	11.43	7.557	7.557	tr|Q5HY54|Q5HY54_HUMAN; sp|P21333|FLNA_HUMAN	Filamin-A OS=Homo sapiens GN=FLNA PE=2 SV=1; Filamin-A OS=Homo sapiens GN=FLNA PE=1 SV=4			1.3279	95.55	DAPQDFHPDR			-0.000991945	1196.52	599.267	1196.52	599.268	2	10	1.1.1.1843.10	1	19.9877	8153.46	20.0543
12	24.75	24.75	11.43	7.557	7.557	tr|Q5HY54|Q5HY54_HUMAN; sp|P21333|FLNA_HUMAN	Filamin-A OS=Homo sapiens GN=FLNA PE=2 SV=1; Filamin-A OS=Homo sapiens GN=FLNA PE=1 SV=4			0.170696	33.89	YGGDEIPFSPYR			-0.000580111	1399.64	700.827	1399.64	700.828	2	6	1.1.1.2725.8	1	56.9772	1484.41	57.0523
12	24.75	24.75	11.43	7.557	7.557	tr|Q5HY54|Q5HY54_HUMAN; sp|P21333|FLNA_HUMAN	Filamin-A OS=Homo sapiens GN=FLNA PE=2 SV=1; Filamin-A OS=Homo sapiens GN=FLNA PE=1 SV=4			0.0721166	16.1	DGSCGVAYVVQEPGDYEVSVK	Carbamidomethyl(C)@4		0.00682491	2257.03	1129.52	2257.02	1129.52	2	8	1.1.1.2752.37	1	58.1395	14991.6	58.2743
12	24.75	24.75	11.43	7.557	7.557	tr|Q5HY54|Q5HY54_HUMAN; sp|P21333|FLNA_HUMAN	Filamin-A OS=Homo sapiens GN=FLNA PE=2 SV=1; Filamin-A OS=Homo sapiens GN=FLNA PE=1 SV=4			0	99	CSGPGLSPGMVR	Carbamidomethyl(C)@1; Phospho(S)@7		0.0025214	1296.54	649.276	1296.54	649.275	2	14	1.1.1.2386.12	1	42.7236	9138.19	42.8374
12	24.75	24.75	11.43	7.557	7.557	tr|Q5HY54|Q5HY54_HUMAN; sp|P21333|FLNA_HUMAN	Filamin-A OS=Homo sapiens GN=FLNA PE=2 SV=1; Filamin-A OS=Homo sapiens GN=FLNA PE=1 SV=4			0	99	DAGEGGLSLAIEGPSK			-0.00198278	1499.74	750.88	1499.75	750.881	2	18	1.1.1.2624.10	1	52.7371	15990.8	52.6839
12	24.75	24.75	11.43	7.557	7.557	tr|Q5HY54|Q5HY54_HUMAN; sp|P21333|FLNA_HUMAN	Filamin-A OS=Homo sapiens GN=FLNA PE=2 SV=1; Filamin-A OS=Homo sapiens GN=FLNA PE=1 SV=4			0	99	DAGEGGLSLAIEGPSK			-0.00198278	1499.74	750.88	1499.75	750.881	2	18	1.1.1.2632.13	1	53.0756	16422.4	52.6419
12	24.75	24.75	11.43	7.557	7.557	tr|Q5HY54|Q5HY54_HUMAN; sp|P21333|FLNA_HUMAN	Filamin-A OS=Homo sapiens GN=FLNA PE=2 SV=1; Filamin-A OS=Homo sapiens GN=FLNA PE=1 SV=4			0	99	DAGEGGLSLAIEGPSK			-0.00295934	1499.74	750.879	1499.75	750.881	2	12	1.1.1.2668.13	1	54.5835	1138.7	54.5701
12	24.75	24.75	11.43	7.557	7.557	tr|Q5HY54|Q5HY54_HUMAN; sp|P21333|FLNA_HUMAN	Filamin-A OS=Homo sapiens GN=FLNA PE=2 SV=1; Filamin-A OS=Homo sapiens GN=FLNA PE=1 SV=4			0	99	DAGEGGLSLAIEGPSK			-0.00344762	1499.74	750.879	1499.75	750.881	2	10	1.1.1.2677.12	1	54.9598	1642.15	54.8633
12	24.75	24.75	11.43	7.557	7.557	tr|Q5HY54|Q5HY54_HUMAN; sp|P21333|FLNA_HUMAN	Filamin-A OS=Homo sapiens GN=FLNA PE=2 SV=1; Filamin-A OS=Homo sapiens GN=FLNA PE=1 SV=4			0	99	DAGEGLLAVQITDPEGKPK			-0.000768311	1937.01	969.512	1937.01	969.513	2	17	1.1.1.2713.28	1	56.4864	5074.53	56.46
12	24.75	24.75	11.43	7.557	7.557	tr|Q5HY54|Q5HY54_HUMAN; sp|P21333|FLNA_HUMAN	Filamin-A OS=Homo sapiens GN=FLNA PE=2 SV=1; Filamin-A OS=Homo sapiens GN=FLNA PE=1 SV=4			0	99	DAGEGLLAVQITDPEGKPK			-0.000768311	1937.01	969.512	1937.01	969.513	2	13	1.1.1.2721.29	1	56.8257	5074.53	56.46
12	24.75	24.75	11.43	7.557	7.557	tr|Q5HY54|Q5HY54_HUMAN; sp|P21333|FLNA_HUMAN	Filamin-A OS=Homo sapiens GN=FLNA PE=2 SV=1; Filamin-A OS=Homo sapiens GN=FLNA PE=1 SV=4			0	85.39	DAPQDFHPDR			-0.000991945	1196.52	599.267	1196.52	599.268	2	9	1.1.1.1851.12	1	20.3166	8153.46	20.0543
12	24.75	24.75	11.43	7.557	7.557	tr|Q5HY54|Q5HY54_HUMAN; sp|P21333|FLNA_HUMAN	Filamin-A OS=Homo sapiens GN=FLNA PE=2 SV=1; Filamin-A OS=Homo sapiens GN=FLNA PE=1 SV=4			0	76.71	DAPQDFHPDR			0.00144947	1196.52	599.269	1196.52	599.268	2	7	1.1.1.1859.21	1	20.6613	6687.11	20.2208
12	24.75	24.75	11.43	7.557	7.557	tr|Q5HY54|Q5HY54_HUMAN; sp|P21333|FLNA_HUMAN	Filamin-A OS=Homo sapiens GN=FLNA PE=2 SV=1; Filamin-A OS=Homo sapiens GN=FLNA PE=1 SV=4			0	15.4	DGSCGVAYVVQEPGDYEVSVK	Carbamidomethyl(C)@4		0.00658077	2257.03	1129.52	2257.02	1129.52	2	8	1.1.1.2765.37	1	58.6871	15368.2	58.2743
12	24.75	24.75	11.43	7.557	7.557	tr|Q5HY54|Q5HY54_HUMAN; sp|P21333|FLNA_HUMAN	Filamin-A OS=Homo sapiens GN=FLNA PE=2 SV=1; Filamin-A OS=Homo sapiens GN=FLNA PE=1 SV=4			0	99	DLAEDAPWK			-0.000754745	1043.49	522.753	1043.49	522.753	2	7	1.1.1.2532.2	0	48.8553	4874.41	49.1451
12	24.75	24.75	11.43	7.557	7.557	tr|Q5HY54|Q5HY54_HUMAN; sp|P21333|FLNA_HUMAN	Filamin-A OS=Homo sapiens GN=FLNA PE=2 SV=1; Filamin-A OS=Homo sapiens GN=FLNA PE=1 SV=4			0	98.75	EATTEFSVDAR			0.000264344	1224.56	613.288	1224.56	613.288	2	10	1.1.1.2173.10	1	33.7799	4065	33.9359
12	24.75	24.75	11.43	7.557	7.557	tr|Q5HY54|Q5HY54_HUMAN; sp|P21333|FLNA_HUMAN	Filamin-A OS=Homo sapiens GN=FLNA PE=2 SV=1; Filamin-A OS=Homo sapiens GN=FLNA PE=1 SV=4			0	91.64	EATTEFSVDAR			-0.0125531	1224.55	613.282	1224.56	613.288	2	10	1.1.1.2190.14	0	34.493	12333.6	34.7728
12	24.75	24.75	11.43	7.557	7.557	tr|Q5HY54|Q5HY54_HUMAN; sp|P21333|FLNA_HUMAN	Filamin-A OS=Homo sapiens GN=FLNA PE=2 SV=1; Filamin-A OS=Homo sapiens GN=FLNA PE=1 SV=4			0	50.98	EATTEFSVDAR			-0.0125531	1224.55	613.282	1224.56	613.288	2	9	1.1.1.2198.11	0	34.8267	12333.6	34.7728
12	24.75	24.75	11.43	7.557	7.557	tr|Q5HY54|Q5HY54_HUMAN; sp|P21333|FLNA_HUMAN	Filamin-A OS=Homo sapiens GN=FLNA PE=2 SV=1; Filamin-A OS=Homo sapiens GN=FLNA PE=1 SV=4			0	29.6	EATTEFSVDAR			-0.0119427	1224.55	613.282	1224.56	613.288	2	6	1.1.1.2214.12	0	35.502	4666.72	35.0673
12	24.75	24.75	11.43	7.557	7.557	tr|Q5HY54|Q5HY54_HUMAN; sp|P21333|FLNA_HUMAN	Filamin-A OS=Homo sapiens GN=FLNA PE=2 SV=1; Filamin-A OS=Homo sapiens GN=FLNA PE=1 SV=4			0	99	MDCQECPEGYR	Carbamidomethyl(C)@3; Carbamidomethyl(C)@6		-0.0020188	1443.52	722.767	1443.52	722.768	2	14	1.1.1.1939.27	1	24.0161	12796.6	24.0749
12	24.75	24.75	11.43	7.557	7.557	tr|Q5HY54|Q5HY54_HUMAN; sp|P21333|FLNA_HUMAN	Filamin-A OS=Homo sapiens GN=FLNA PE=2 SV=1; Filamin-A OS=Homo sapiens GN=FLNA PE=1 SV=4			0	94.9	MDCQECPEGYR	Carbamidomethyl(C)@3; Carbamidomethyl(C)@6		0.00115503	1443.52	722.769	1443.52	722.768	2	9	1.1.1.1947.23	1	24.3484	2350.07	24.3267
12	24.75	24.75	11.43	7.557	7.557	tr|Q5HY54|Q5HY54_HUMAN; sp|P21333|FLNA_HUMAN	Filamin-A OS=Homo sapiens GN=FLNA PE=2 SV=1; Filamin-A OS=Homo sapiens GN=FLNA PE=1 SV=4			0	77.39	MDCQECPEGYR	Carbamidomethyl(C)@3; Deamidated(Q)@4; Carbamidomethyl(C)@6		0.0149432	1444.52	723.268	1444.51	723.26	2	10	1.1.1.1941.23	1	24.0968	5881.9	24.0749
12	24.75	24.75	11.43	7.557	7.557	tr|Q5HY54|Q5HY54_HUMAN; sp|P21333|FLNA_HUMAN	Filamin-A OS=Homo sapiens GN=FLNA PE=2 SV=1; Filamin-A OS=Homo sapiens GN=FLNA PE=1 SV=4			0	19.08	VANPSGNLTETYVQDR			-0.00238274	1762.85	882.43	1762.85	882.432	2	8	1.1.1.2369.32	1	42.024	4949.34	41.8694
13	23.33	23.33	27.11	22.65	21.21	tr|E9PKE3|E9PKE3_HUMAN; sp|P11142|HSP7C_HUMAN	Heat shock cognate 71 kDa protein OS=Homo sapiens GN=HSPA8 PE=2 SV=1; Heat shock cognate 71 kDa protein OS=Homo sapiens GN=HSPA8 PE=1 SV=1			2	99	CNEIINWLDK	Carbamidomethyl(C)@1; Deamidated(N)@2		0.000302622	1304.61	653.311	1304.61	653.311	2	10	1.1.1.3132.3	1	74.1523	1968.06	74.1891
13	23.33	23.33	27.11	22.65	21.21	tr|E9PKE3|E9PKE3_HUMAN; sp|P11142|HSP7C_HUMAN	Heat shock cognate 71 kDa protein OS=Homo sapiens GN=HSPA8 PE=2 SV=1; Heat shock cognate 71 kDa protein OS=Homo sapiens GN=HSPA8 PE=1 SV=1			2	99	DAGTIAGLNVLR			0.000913172	1198.67	600.341	1198.67	600.341	2	12	1.1.1.2781.3	1	59.3321	7925.35	59.159
13	23.33	23.33	27.11	22.65	21.21	tr|E9PKE3|E9PKE3_HUMAN; sp|P11142|HSP7C_HUMAN	Heat shock cognate 71 kDa protein OS=Homo sapiens GN=HSPA8 PE=2 SV=1; Heat shock cognate 71 kDa protein OS=Homo sapiens GN=HSPA8 PE=1 SV=1			2	99	FDDAVVQSDMK			-0.000877465	1253.56	627.787	1253.56	627.787	2	16	1.1.1.2296.10	1	38.9388	79171.2	39.0538
13	23.33	23.33	27.11	22.65	21.21	tr|E9PKE3|E9PKE3_HUMAN; sp|P11142|HSP7C_HUMAN	Heat shock cognate 71 kDa protein OS=Homo sapiens GN=HSPA8 PE=2 SV=1; Heat shock cognate 71 kDa protein OS=Homo sapiens GN=HSPA8 PE=1 SV=1			2	99	FEELNADLFR			-0.0023084	1252.61	627.311	1252.61	627.312	2	11	1.1.1.2916.2	1	65.0179	2164.35	65.0132
13	23.33	23.33	27.11	22.65	21.21	tr|E9PKE3|E9PKE3_HUMAN; sp|P11142|HSP7C_HUMAN	Heat shock cognate 71 kDa protein OS=Homo sapiens GN=HSPA8 PE=2 SV=1; Heat shock cognate 71 kDa protein OS=Homo sapiens GN=HSPA8 PE=1 SV=1			2	99	NQVAMNPTNTVFDAK	Deamidated(N)@1		-0.0027623	1649.77	825.892	1649.77	825.893	2	14	1.1.1.2634.23	1	53.1679	9891.36	53.566
13	23.33	23.33	27.11	22.65	21.21	tr|E9PKE3|E9PKE3_HUMAN; sp|P11142|HSP7C_HUMAN	Heat shock cognate 71 kDa protein OS=Homo sapiens GN=HSPA8 PE=2 SV=1; Heat shock cognate 71 kDa protein OS=Homo sapiens GN=HSPA8 PE=1 SV=1			2	99	RFDDAVVQSDMK		missed R-F@1	-0.00574707	1409.66	705.835	1409.66	705.838	2	11	1.1.1.2200.13	1	34.9125	9860.57	34.4787
13	23.33	23.33	27.11	22.65	21.21	tr|E9PKE3|E9PKE3_HUMAN; sp|P11142|HSP7C_HUMAN	Heat shock cognate 71 kDa protein OS=Homo sapiens GN=HSPA8 PE=2 SV=1; Heat shock cognate 71 kDa protein OS=Homo sapiens GN=HSPA8 PE=1 SV=1			2	99	STAGDTHLGGEDFDNR			-0.000367063	1690.72	846.366	1690.72	846.366	2	19	1.1.1.2058.25	1	28.9807	83180.9	29.3654
13	23.33	23.33	27.11	22.65	21.21	tr|E9PKE3|E9PKE3_HUMAN; sp|P11142|HSP7C_HUMAN	Heat shock cognate 71 kDa protein OS=Homo sapiens GN=HSPA8 PE=2 SV=1; Heat shock cognate 71 kDa protein OS=Homo sapiens GN=HSPA8 PE=1 SV=1			2	99	TTPSYVAFTDTER			0.000332253	1486.69	744.354	1486.69	744.354	2	14	1.1.1.2465.15	1	46.0474	21940.3	46.0322
13	23.33	23.33	27.11	22.65	21.21	tr|E9PKE3|E9PKE3_HUMAN; sp|P11142|HSP7C_HUMAN	Heat shock cognate 71 kDa protein OS=Homo sapiens GN=HSPA8 PE=2 SV=1; Heat shock cognate 71 kDa protein OS=Homo sapiens GN=HSPA8 PE=1 SV=1			2	99	VEIIANDQGNR			-0.000714306	1227.62	614.817	1227.62	614.818	2	12	1.1.1.1948.18	0	24.3861	31957.8	24.0749
13	23.33	23.33	27.11	22.65	21.21	tr|E9PKE3|E9PKE3_HUMAN; sp|P11142|HSP7C_HUMAN	Heat shock cognate 71 kDa protein OS=Homo sapiens GN=HSPA8 PE=2 SV=1; Heat shock cognate 71 kDa protein OS=Homo sapiens GN=HSPA8 PE=1 SV=1			1.67778	97.99	MVQEAEKYKAEDEK		missed K-Y@7; missed K-A@9	0.000806987	1696.8	566.607	1696.8	566.607	3	11	1.1.1.1801.17	1	18.2231	7926.1	18.164
13	23.33	23.33	27.11	22.65	21.21	tr|E9PKE3|E9PKE3_HUMAN; sp|P11142|HSP7C_HUMAN	Heat shock cognate 71 kDa protein OS=Homo sapiens GN=HSPA8 PE=2 SV=1; Heat shock cognate 71 kDa protein OS=Homo sapiens GN=HSPA8 PE=1 SV=1			1.65758	99	NSLESYAFNMK	Deamidated(N)@1		-0.00254637	1303.57	652.794	1303.58	652.795	2	10	1.1.1.2911.4	1	64.8083	6088.8	65.0555
13	23.33	23.33	27.11	22.65	21.21	tr|E9PKE3|E9PKE3_HUMAN; sp|P11142|HSP7C_HUMAN	Heat shock cognate 71 kDa protein OS=Homo sapiens GN=HSPA8 PE=2 SV=1; Heat shock cognate 71 kDa protein OS=Homo sapiens GN=HSPA8 PE=1 SV=1			1.20066	98.54	LLQDFFNGK	Deamidated(N)@7		-0.000979137	1081.54	541.779	1081.54	541.779	2	7	1.1.1.2877.2	1	63.3662	1358.41	63.4038
13	23.33	23.33	27.11	22.65	21.21	tr|E9PKE3|E9PKE3_HUMAN; sp|P11142|HSP7C_HUMAN	Heat shock cognate 71 kDa protein OS=Homo sapiens GN=HSPA8 PE=2 SV=1; Heat shock cognate 71 kDa protein OS=Homo sapiens GN=HSPA8 PE=1 SV=1			0.798603	84.96	EIAEAYLGK			-0.000590214	992.517	497.266	992.518	497.266	2	6	1.1.1.2264.2	0	37.5955	11874.1	37.2555
13	23.33	23.33	27.11	22.65	21.21	tr|E9PKE3|E9PKE3_HUMAN; sp|P11142|HSP7C_HUMAN	Heat shock cognate 71 kDa protein OS=Homo sapiens GN=HSPA8 PE=2 SV=1; Heat shock cognate 71 kDa protein OS=Homo sapiens GN=HSPA8 PE=1 SV=1			0	99	DAGTIAGLNVLR			0.000913172	1198.67	600.341	1198.67	600.341	2	10	1.1.1.2773.3	1	58.9962	7925.35	59.159
13	23.33	23.33	27.11	22.65	21.21	tr|E9PKE3|E9PKE3_HUMAN; sp|P11142|HSP7C_HUMAN	Heat shock cognate 71 kDa protein OS=Homo sapiens GN=HSPA8 PE=2 SV=1; Heat shock cognate 71 kDa protein OS=Homo sapiens GN=HSPA8 PE=1 SV=1			0	99	FDDAVVQSDMK			-0.000877465	1253.56	627.787	1253.56	627.787	2	15	1.1.1.2304.13	1	39.2785	79171.2	39.0538
13	23.33	23.33	27.11	22.65	21.21	tr|E9PKE3|E9PKE3_HUMAN; sp|P11142|HSP7C_HUMAN	Heat shock cognate 71 kDa protein OS=Homo sapiens GN=HSPA8 PE=2 SV=1; Heat shock cognate 71 kDa protein OS=Homo sapiens GN=HSPA8 PE=1 SV=1			0	99	FDDAVVQSDMK			-0.000633324	1253.56	627.787	1253.56	627.787	2	12	1.1.1.2312.13	1	39.6159	46540	39.1804
13	23.33	23.33	27.11	22.65	21.21	tr|E9PKE3|E9PKE3_HUMAN; sp|P11142|HSP7C_HUMAN	Heat shock cognate 71 kDa protein OS=Homo sapiens GN=HSPA8 PE=2 SV=1; Heat shock cognate 71 kDa protein OS=Homo sapiens GN=HSPA8 PE=1 SV=1			0	99	FDDAVVQSDMK			0.00193016	1253.56	627.788	1253.56	627.787	2	11	1.1.1.2321.13	1	39.9958	2124.69	39.8552
13	23.33	23.33	27.11	22.65	21.21	tr|E9PKE3|E9PKE3_HUMAN; sp|P11142|HSP7C_HUMAN	Heat shock cognate 71 kDa protein OS=Homo sapiens GN=HSPA8 PE=2 SV=1; Heat shock cognate 71 kDa protein OS=Homo sapiens GN=HSPA8 PE=1 SV=1			0	99	FDDAVVQSDMK	Oxidation(M)@10		-0.000659689	1269.55	635.784	1269.55	635.785	2	12	1.1.1.2007.14	1	26.845	3491.46	26.9969
13	23.33	23.33	27.11	22.65	21.21	tr|E9PKE3|E9PKE3_HUMAN; sp|P11142|HSP7C_HUMAN	Heat shock cognate 71 kDa protein OS=Homo sapiens GN=HSPA8 PE=2 SV=1; Heat shock cognate 71 kDa protein OS=Homo sapiens GN=HSPA8 PE=1 SV=1			0	98.71	FDDAVVQSDMK	Oxidation(M)@10		-0.000659689	1269.55	635.784	1269.55	635.785	2	9	1.1.1.2015.16	1	27.1778	3491.46	26.9969
13	23.33	23.33	27.11	22.65	21.21	tr|E9PKE3|E9PKE3_HUMAN; sp|P11142|HSP7C_HUMAN	Heat shock cognate 71 kDa protein OS=Homo sapiens GN=HSPA8 PE=2 SV=1; Heat shock cognate 71 kDa protein OS=Homo sapiens GN=HSPA8 PE=1 SV=1			0	99	FEELNADLFR			-0.0023084	1252.61	627.311	1252.61	627.312	2	11	1.1.1.2908.2	1	64.6794	2193.66	65.0132
13	23.33	23.33	27.11	22.65	21.21	tr|E9PKE3|E9PKE3_HUMAN; sp|P11142|HSP7C_HUMAN	Heat shock cognate 71 kDa protein OS=Homo sapiens GN=HSPA8 PE=2 SV=1; Heat shock cognate 71 kDa protein OS=Homo sapiens GN=HSPA8 PE=1 SV=1			0	99	FEELNADLFR			0.000133008	1252.61	627.312	1252.61	627.312	2	6	1.1.1.2925.2	1	65.4001	1217.8	65.2254
13	23.33	23.33	27.11	22.65	21.21	tr|E9PKE3|E9PKE3_HUMAN; sp|P11142|HSP7C_HUMAN	Heat shock cognate 71 kDa protein OS=Homo sapiens GN=HSPA8 PE=2 SV=1; Heat shock cognate 71 kDa protein OS=Homo sapiens GN=HSPA8 PE=1 SV=1			0	97.96	LLQDFFNGK	Deamidated(N)@7		-0.00146742	1081.54	541.779	1081.54	541.779	2	9	1.1.1.2844.2	1	61.9744	13307.7	61.6751
13	23.33	23.33	27.11	22.65	21.21	tr|E9PKE3|E9PKE3_HUMAN; sp|P11142|HSP7C_HUMAN	Heat shock cognate 71 kDa protein OS=Homo sapiens GN=HSPA8 PE=2 SV=1; Heat shock cognate 71 kDa protein OS=Homo sapiens GN=HSPA8 PE=1 SV=1			0	75.1	LLQDFFNGK	Deamidated(N)@7		-0.00146742	1081.54	541.779	1081.54	541.779	2	9	1.1.1.2836.2	1	61.6374	13307.7	61.6751
13	23.33	23.33	27.11	22.65	21.21	tr|E9PKE3|E9PKE3_HUMAN; sp|P11142|HSP7C_HUMAN	Heat shock cognate 71 kDa protein OS=Homo sapiens GN=HSPA8 PE=2 SV=1; Heat shock cognate 71 kDa protein OS=Homo sapiens GN=HSPA8 PE=1 SV=1			0	70.87	LLQDFFNGK	Deamidated(N)@7		-0.00122328	1081.54	541.779	1081.54	541.779	2	7	1.1.1.2852.3	1	62.3122	6355.53	61.8859
13	23.33	23.33	27.11	22.65	21.21	tr|E9PKE3|E9PKE3_HUMAN; sp|P11142|HSP7C_HUMAN	Heat shock cognate 71 kDa protein OS=Homo sapiens GN=HSPA8 PE=2 SV=1; Heat shock cognate 71 kDa protein OS=Homo sapiens GN=HSPA8 PE=1 SV=1			0	65.26	LLQDFFNGK	Deamidated(N)@7		-0.00146742	1081.54	541.779	1081.54	541.779	2	7	1.1.1.2828.4	1	61.3011	13036.1	61.6327
13	23.33	23.33	27.11	22.65	21.21	tr|E9PKE3|E9PKE3_HUMAN; sp|P11142|HSP7C_HUMAN	Heat shock cognate 71 kDa protein OS=Homo sapiens GN=HSPA8 PE=2 SV=1; Heat shock cognate 71 kDa protein OS=Homo sapiens GN=HSPA8 PE=1 SV=1			0	99	NQVAMNPTNTVFDAK	Deamidated(N)@1		-0.0027623	1649.77	825.892	1649.77	825.893	2	18	1.1.1.2642.25	1	53.5055	15385.6	53.6922
13	23.33	23.33	27.11	22.65	21.21	tr|E9PKE3|E9PKE3_HUMAN; sp|P11142|HSP7C_HUMAN	Heat shock cognate 71 kDa protein OS=Homo sapiens GN=HSPA8 PE=2 SV=1; Heat shock cognate 71 kDa protein OS=Homo sapiens GN=HSPA8 PE=1 SV=1			0	99	NQVAMNPTNTVFDAK	Deamidated(N)@1		-0.0027623	1649.77	825.892	1649.77	825.893	2	18	1.1.1.2650.16	1	53.8345	15385.6	53.6922
13	23.33	23.33	27.11	22.65	21.21	tr|E9PKE3|E9PKE3_HUMAN; sp|P11142|HSP7C_HUMAN	Heat shock cognate 71 kDa protein OS=Homo sapiens GN=HSPA8 PE=2 SV=1; Heat shock cognate 71 kDa protein OS=Homo sapiens GN=HSPA8 PE=1 SV=1			0	99	NQVAMNPTNTVFDAK			-0.00165438	1648.79	825.4	1648.79	825.401	2	10	1.1.1.2493.19	1	47.2282	3298.55	46.9565
13	23.33	23.33	27.11	22.65	21.21	tr|E9PKE3|E9PKE3_HUMAN; sp|P11142|HSP7C_HUMAN	Heat shock cognate 71 kDa protein OS=Homo sapiens GN=HSPA8 PE=2 SV=1; Heat shock cognate 71 kDa protein OS=Homo sapiens GN=HSPA8 PE=1 SV=1			0	98.62	NQVAMNPTNTVFDAK			-0.00165438	1648.79	825.4	1648.79	825.401	2	9	1.1.1.2485.21	1	46.8927	3298.55	46.9565
13	23.33	23.33	27.11	22.65	21.21	tr|E9PKE3|E9PKE3_HUMAN; sp|P11142|HSP7C_HUMAN	Heat shock cognate 71 kDa protein OS=Homo sapiens GN=HSPA8 PE=2 SV=1; Heat shock cognate 71 kDa protein OS=Homo sapiens GN=HSPA8 PE=1 SV=1			0	81.82	NQVAMNPTNTVFDAK	Deamidated(N)@1		-0.00300644	1649.77	825.892	1649.77	825.893	2	7	1.1.1.2659.20	1	54.2137	11745.6	53.7765
13	23.33	23.33	27.11	22.65	21.21	tr|E9PKE3|E9PKE3_HUMAN; sp|P11142|HSP7C_HUMAN	Heat shock cognate 71 kDa protein OS=Homo sapiens GN=HSPA8 PE=2 SV=1; Heat shock cognate 71 kDa protein OS=Homo sapiens GN=HSPA8 PE=1 SV=1			0	85.05	NSLESYAFNMK	Deamidated(N)@1		-0.00254637	1303.57	652.794	1303.58	652.795	2	10	1.1.1.2919.2	1	65.1453	6088.8	65.0555
13	23.33	23.33	27.11	22.65	21.21	tr|E9PKE3|E9PKE3_HUMAN; sp|P11142|HSP7C_HUMAN	Heat shock cognate 71 kDa protein OS=Homo sapiens GN=HSPA8 PE=2 SV=1; Heat shock cognate 71 kDa protein OS=Homo sapiens GN=HSPA8 PE=1 SV=1			0	35.24	NSLESYAFNMK	Deamidated(N)@1		-0.000715315	1303.57	652.795	1303.58	652.795	2	6	1.1.1.2927.4	1	65.4867	4174.44	65.2254
13	23.33	23.33	27.11	22.65	21.21	tr|E9PKE3|E9PKE3_HUMAN; sp|P11142|HSP7C_HUMAN	Heat shock cognate 71 kDa protein OS=Homo sapiens GN=HSPA8 PE=2 SV=1; Heat shock cognate 71 kDa protein OS=Homo sapiens GN=HSPA8 PE=1 SV=1			0	99	RFDDAVVQSDMK		missed R-F@1	-0.00208495	1409.66	705.837	1409.66	705.838	2	15	1.1.1.2176.15	1	33.9091	35496.9	34.1862
13	23.33	23.33	27.11	22.65	21.21	tr|E9PKE3|E9PKE3_HUMAN; sp|P11142|HSP7C_HUMAN	Heat shock cognate 71 kDa protein OS=Homo sapiens GN=HSPA8 PE=2 SV=1; Heat shock cognate 71 kDa protein OS=Homo sapiens GN=HSPA8 PE=1 SV=1			0	99	RFDDAVVQSDMK		missed R-F@1	-0.00208495	1409.66	705.837	1409.66	705.838	2	19	1.1.1.2184.16	1	34.2439	35496.9	34.1862
13	23.33	23.33	27.11	22.65	21.21	tr|E9PKE3|E9PKE3_HUMAN; sp|P11142|HSP7C_HUMAN	Heat shock cognate 71 kDa protein OS=Homo sapiens GN=HSPA8 PE=2 SV=1; Heat shock cognate 71 kDa protein OS=Homo sapiens GN=HSPA8 PE=1 SV=1			0	99	RFDDAVVQSDMK		missed R-F@1	-0.00208495	1409.66	705.837	1409.66	705.838	2	18	1.1.1.2192.22	1	34.5837	36370.9	34.1443
13	23.33	23.33	27.11	22.65	21.21	tr|E9PKE3|E9PKE3_HUMAN; sp|P11142|HSP7C_HUMAN	Heat shock cognate 71 kDa protein OS=Homo sapiens GN=HSPA8 PE=2 SV=1; Heat shock cognate 71 kDa protein OS=Homo sapiens GN=HSPA8 PE=1 SV=1			0	99	STAGDTHLGGEDFDNR			0.00219642	1690.72	846.368	1690.72	846.366	2	16	1.1.1.2086.33	1	30.1501	31362.5	29.6986
13	23.33	23.33	27.11	22.65	21.21	tr|E9PKE3|E9PKE3_HUMAN; sp|P11142|HSP7C_HUMAN	Heat shock cognate 71 kDa protein OS=Homo sapiens GN=HSPA8 PE=2 SV=1; Heat shock cognate 71 kDa protein OS=Homo sapiens GN=HSPA8 PE=1 SV=1			0	99	STAGDTHLGGEDFDNR			-0.00439539	1690.71	846.364	1690.72	846.366	2	13	1.1.1.2095.38	1	30.5341	1819.7	30.5417
13	23.33	23.33	27.11	22.65	21.21	tr|E9PKE3|E9PKE3_HUMAN; sp|P11142|HSP7C_HUMAN	Heat shock cognate 71 kDa protein OS=Homo sapiens GN=HSPA8 PE=2 SV=1; Heat shock cognate 71 kDa protein OS=Homo sapiens GN=HSPA8 PE=1 SV=1			0	99	STAGDTHLGGEDFDNR			0.0027851	1690.72	564.581	1690.72	564.58	3	13	1.1.1.2070.7	1	29.4565	249287	29.3654
13	23.33	23.33	27.11	22.65	21.21	tr|E9PKE3|E9PKE3_HUMAN; sp|P11142|HSP7C_HUMAN	Heat shock cognate 71 kDa protein OS=Homo sapiens GN=HSPA8 PE=2 SV=1; Heat shock cognate 71 kDa protein OS=Homo sapiens GN=HSPA8 PE=1 SV=1			0	99	STAGDTHLGGEDFDNR			0.0027851	1690.72	564.581	1690.72	564.58	3	12	1.1.1.2062.4	1	29.1225	249287	29.3654
13	23.33	23.33	27.11	22.65	21.21	tr|E9PKE3|E9PKE3_HUMAN; sp|P11142|HSP7C_HUMAN	Heat shock cognate 71 kDa protein OS=Homo sapiens GN=HSPA8 PE=2 SV=1; Heat shock cognate 71 kDa protein OS=Homo sapiens GN=HSPA8 PE=1 SV=1			0	99	STAGDTHLGGEDFDNR			0.0027851	1690.72	564.581	1690.72	564.58	3	12	1.1.1.2078.9	1	29.7928	246719	29.3654
13	23.33	23.33	27.11	22.65	21.21	tr|E9PKE3|E9PKE3_HUMAN; sp|P11142|HSP7C_HUMAN	Heat shock cognate 71 kDa protein OS=Homo sapiens GN=HSPA8 PE=2 SV=1; Heat shock cognate 71 kDa protein OS=Homo sapiens GN=HSPA8 PE=1 SV=1			0	85.06	STAGDTHLGGEDFDNR			0.0027851	1690.72	564.581	1690.72	564.58	3	7	1.1.1.2054.6	1	28.7922	147968	29.1999
13	23.33	23.33	27.11	22.65	21.21	tr|E9PKE3|E9PKE3_HUMAN; sp|P11142|HSP7C_HUMAN	Heat shock cognate 71 kDa protein OS=Homo sapiens GN=HSPA8 PE=2 SV=1; Heat shock cognate 71 kDa protein OS=Homo sapiens GN=HSPA8 PE=1 SV=1			0	79.43	STAGDTHLGGEDFDNR			-0.00439539	1690.71	846.364	1690.72	846.366	2	9	1.1.1.2103.38	1	30.8709	1819.7	30.5417
13	23.33	23.33	27.11	22.65	21.21	tr|E9PKE3|E9PKE3_HUMAN; sp|P11142|HSP7C_HUMAN	Heat shock cognate 71 kDa protein OS=Homo sapiens GN=HSPA8 PE=2 SV=1; Heat shock cognate 71 kDa protein OS=Homo sapiens GN=HSPA8 PE=1 SV=1			0	33.3	STAGDTHLGGEDFDNR			0.000243289	1690.72	846.367	1690.72	846.366	2	7	1.1.1.2115.32	1	31.3674	1056.63	31.3382
13	23.33	23.33	27.11	22.65	21.21	tr|E9PKE3|E9PKE3_HUMAN; sp|P11142|HSP7C_HUMAN	Heat shock cognate 71 kDa protein OS=Homo sapiens GN=HSPA8 PE=2 SV=1; Heat shock cognate 71 kDa protein OS=Homo sapiens GN=HSPA8 PE=1 SV=1			0	99	TTPSYVAFTDTER			0.000332253	1486.69	744.354	1486.69	744.354	2	11	1.1.1.2473.15	1	46.3844	21940.3	46.0322
13	23.33	23.33	27.11	22.65	21.21	tr|E9PKE3|E9PKE3_HUMAN; sp|P11142|HSP7C_HUMAN	Heat shock cognate 71 kDa protein OS=Homo sapiens GN=HSPA8 PE=2 SV=1; Heat shock cognate 71 kDa protein OS=Homo sapiens GN=HSPA8 PE=1 SV=1			0	99	TTPSYVAFTDTER			0.000332253	1486.69	744.354	1486.69	744.354	2	12	1.1.1.2457.14	1	45.7105	21871.3	46.0322
13	23.33	23.33	27.11	22.65	21.21	tr|E9PKE3|E9PKE3_HUMAN; sp|P11142|HSP7C_HUMAN	Heat shock cognate 71 kDa protein OS=Homo sapiens GN=HSPA8 PE=2 SV=1; Heat shock cognate 71 kDa protein OS=Homo sapiens GN=HSPA8 PE=1 SV=1			0	98.6	TTPSYVAFTDTER			0.00338402	1486.7	744.356	1486.69	744.354	2	8	1.1.1.2489.21	1	47.0611	1314.41	47.125
13	23.33	23.33	27.11	22.65	21.21	tr|E9PKE3|E9PKE3_HUMAN; sp|P11142|HSP7C_HUMAN	Heat shock cognate 71 kDa protein OS=Homo sapiens GN=HSPA8 PE=2 SV=1; Heat shock cognate 71 kDa protein OS=Homo sapiens GN=HSPA8 PE=1 SV=1			0	97.94	TTPSYVAFTDTER			0.000332253	1486.69	744.354	1486.69	744.354	2	9	1.1.1.2481.13	1	46.7181	1797.49	46.7045
13	23.33	23.33	27.11	22.65	21.21	tr|E9PKE3|E9PKE3_HUMAN; sp|P11142|HSP7C_HUMAN	Heat shock cognate 71 kDa protein OS=Homo sapiens GN=HSPA8 PE=2 SV=1; Heat shock cognate 71 kDa protein OS=Homo sapiens GN=HSPA8 PE=1 SV=1			0	99	VEIIANDQGNR			-0.000714306	1227.62	614.817	1227.62	614.818	2	13	1.1.1.1940.20	0	24.0523	31957.8	24.0749
13	23.33	23.33	27.11	22.65	21.21	tr|E9PKE3|E9PKE3_HUMAN; sp|P11142|HSP7C_HUMAN	Heat shock cognate 71 kDa protein OS=Homo sapiens GN=HSPA8 PE=2 SV=1; Heat shock cognate 71 kDa protein OS=Homo sapiens GN=HSPA8 PE=1 SV=1			0	99	VEIIANDQGNR	Deamidated(N)@6		0.00025662	1228.61	615.31	1228.6	615.31	2	10	1.1.1.2010.14	0	26.9693	3373.26	26.7064
13	23.33	23.33	27.11	22.65	21.21	tr|E9PKE3|E9PKE3_HUMAN; sp|P11142|HSP7C_HUMAN	Heat shock cognate 71 kDa protein OS=Homo sapiens GN=HSPA8 PE=2 SV=1; Heat shock cognate 71 kDa protein OS=Homo sapiens GN=HSPA8 PE=1 SV=1			0	99	VEIIANDQGNR			-0.00352193	1227.62	614.816	1227.62	614.818	2	9	1.1.1.1956.20	0	24.7222	1865.67	24.6609
13	23.33	23.33	27.11	22.65	21.21	tr|E9PKE3|E9PKE3_HUMAN; sp|P11142|HSP7C_HUMAN	Heat shock cognate 71 kDa protein OS=Homo sapiens GN=HSPA8 PE=2 SV=1; Heat shock cognate 71 kDa protein OS=Homo sapiens GN=HSPA8 PE=1 SV=1			0	99	VEIIANDQGNR			-0.000714306	1227.62	614.817	1227.62	614.818	2	10	1.1.1.1932.17	0	23.7138	31389.8	24.1169
13	23.33	23.33	27.11	22.65	21.21	tr|E9PKE3|E9PKE3_HUMAN; sp|P11142|HSP7C_HUMAN	Heat shock cognate 71 kDa protein OS=Homo sapiens GN=HSPA8 PE=2 SV=1; Heat shock cognate 71 kDa protein OS=Homo sapiens GN=HSPA8 PE=1 SV=1			0	97.04	VEIIANDQGNR	Deamidated(N)@6		-0.000475802	1228.6	615.309	1228.6	615.31	2	11	1.1.1.1986.16	0	25.972	9748.22	26.2896
13	23.33	23.33	27.11	22.65	21.21	tr|E9PKE3|E9PKE3_HUMAN; sp|P11142|HSP7C_HUMAN	Heat shock cognate 71 kDa protein OS=Homo sapiens GN=HSPA8 PE=2 SV=1; Heat shock cognate 71 kDa protein OS=Homo sapiens GN=HSPA8 PE=1 SV=1			0	95.61	VEIIANDQGNR	Deamidated(N)@6		-0.000475802	1228.6	615.309	1228.6	615.31	2	11	1.1.1.1994.11	0	26.3011	9820.8	26.2896
13	23.33	23.33	27.11	22.65	21.21	tr|E9PKE3|E9PKE3_HUMAN; sp|P11142|HSP7C_HUMAN	Heat shock cognate 71 kDa protein OS=Homo sapiens GN=HSPA8 PE=2 SV=1; Heat shock cognate 71 kDa protein OS=Homo sapiens GN=HSPA8 PE=1 SV=1			0	84.85	VEIIANDQGNR	Deamidated(N)@6		-0.000353732	1228.6	615.309	1228.6	615.31	2	10	1.1.1.2002.13	0	26.6381	4172.17	26.5819
13	23.33	23.33	27.11	22.65	21.21	tr|E9PKE3|E9PKE3_HUMAN; sp|P11142|HSP7C_HUMAN	Heat shock cognate 71 kDa protein OS=Homo sapiens GN=HSPA8 PE=2 SV=1; Heat shock cognate 71 kDa protein OS=Homo sapiens GN=HSPA8 PE=1 SV=1			0	79.82	VEIIANDQGNR	Deamidated(N)@10		0.00025662	1228.61	615.31	1228.6	615.31	2	8	1.1.1.1978.17	0	25.6403	2042.22	25.749
14	23.07	23.07	5.978	4.078	3.8	sp|Q15149|PLEC_HUMAN	Plectin OS=Homo sapiens GN=PLEC PE=1 SV=3			2	99	CVEDPETGLCLLPLTDK	Carbamidomethyl(C)@1; Carbamidomethyl(C)@10		-0.00286328	1958.93	980.472	1958.93	980.474	2	15	1.1.1.3101.18	1	72.8477	12094.1	72.7443
14	23.07	23.07	5.978	4.078	3.8	sp|Q15149|PLEC_HUMAN	Plectin OS=Homo sapiens GN=PLEC PE=1 SV=3			2	99	DALDGPAAEAEPEHSFDGLR			-0.00166825	2095.94	1048.98	2095.94	1048.98	2	18	1.1.1.2612.35	1	52.2533	4521.81	52.3056
14	23.07	23.07	5.978	4.078	3.8	sp|Q15149|PLEC_HUMAN	Plectin OS=Homo sapiens GN=PLEC PE=1 SV=3			2	99	DDGTGQLLLPLSDAR			-0.00122597	1569.8	785.907	1569.8	785.907	2	19	1.1.1.2950.11	1	66.4585	7113.75	66.4465
14	23.07	23.07	5.978	4.078	3.8	sp|Q15149|PLEC_HUMAN	Plectin OS=Homo sapiens GN=PLEC PE=1 SV=3			2	99	DSQDAGGFGPEDR			0.00161006	1349.55	675.782	1349.55	675.781	2	14	1.1.1.2001.17	1	26.5983	5556.89	26.5403
14	23.07	23.07	5.978	4.078	3.8	sp|Q15149|PLEC_HUMAN	Plectin OS=Homo sapiens GN=PLEC PE=1 SV=3			2	99	ELAEQELEK			-0.00126247	1087.54	544.777	1087.54	544.777	2	11	1.1.1.2028.4	0	27.7089	5414.56	27.6609
14	23.07	23.07	5.978	4.078	3.8	sp|Q15149|PLEC_HUMAN	Plectin OS=Homo sapiens GN=PLEC PE=1 SV=3			2	99	EQELQQTLQQEQSVLDQLR			-0.00660515	2312.15	1157.08	2312.16	1157.09	2	15	1.1.1.3151.32	1	74.9829	2858.48	74.953
14	23.07	23.07	5.978	4.078	3.8	sp|Q15149|PLEC_HUMAN	Plectin OS=Homo sapiens GN=PLEC PE=1 SV=3			2	99	ESADPLGAWLQDAR			0.000145887	1527.73	764.873	1527.73	764.873	2	11	1.1.1.3135.2	1	74.2788	708.786	74.2736
14	23.07	23.07	5.978	4.078	3.8	sp|Q15149|PLEC_HUMAN	Plectin OS=Homo sapiens GN=PLEC PE=1 SV=3			2	99	GLFDEEMNEILTDPSDDTK			0.00617116	2167.95	1084.98	2167.95	1084.98	2	15	1.1.1.3187.29	1	76.5132	7605.77	76.5283
14	23.07	23.07	5.978	4.078	3.8	sp|Q15149|PLEC_HUMAN	Plectin OS=Homo sapiens GN=PLEC PE=1 SV=3			2	99	LEDLLQDAQDEKEQLNEYK		missed K-E@12	0.0090542	2320.12	774.379	2320.11	774.376	3	10	1.1.1.2930.6	1	65.6156	1689.62	65.565
14	23.07	23.07	5.978	4.078	3.8	sp|Q15149|PLEC_HUMAN	Plectin OS=Homo sapiens GN=PLEC PE=1 SV=3			2	99	LLDPEDVDVPQPDEK			-0.0187198	1707.8	854.908	1707.82	854.917	2	15	1.1.1.2600.20	1	51.7345	19841.6	51.7994
14	23.07	23.07	5.978	4.078	3.8	sp|Q15149|PLEC_HUMAN	Plectin OS=Homo sapiens GN=PLEC PE=1 SV=3			2	99	SSSVGSSSSYPISPAVSR	Phospho(S)@3		0.00798234	1833.82	917.919	1833.81	917.915	2	15	1.1.1.2375.36	1	42.2793	2910.18	42.1623
14	23.07	23.07	5.978	4.078	3.8	sp|Q15149|PLEC_HUMAN	Plectin OS=Homo sapiens GN=PLEC PE=1 SV=3			1.00877	90.75	DTHDQLSEPSEVR			0.00189093	1511.69	504.903	1511.69	504.902	3	6	1.1.1.1963.3	1	25.0022	2388.21	24.997
14	23.07	23.07	5.978	4.078	3.8	sp|Q15149|PLEC_HUMAN	Plectin OS=Homo sapiens GN=PLEC PE=1 SV=3			0	92.27	CVEDPETGLCLLPLTDK	Carbamidomethyl(C)@1; Carbamidomethyl(C)@10		-0.00286328	1958.93	980.472	1958.93	980.474	2	8	1.1.1.3099.18	1	72.7625	12094.1	72.7443
14	23.07	23.07	5.978	4.078	3.8	sp|Q15149|PLEC_HUMAN	Plectin OS=Homo sapiens GN=PLEC PE=1 SV=3			0	99	DALDGPAAEAEPEHSFDGLR			0.00208274	2095.95	699.656	2095.94	699.656	3	12	1.1.1.2609.8	1	52.1041	7110.83	52.2634
14	23.07	23.07	5.978	4.078	3.8	sp|Q15149|PLEC_HUMAN	Plectin OS=Homo sapiens GN=PLEC PE=1 SV=3			0	99	DDGTGQLLLPLSDAR			-0.00122597	1569.8	785.907	1569.8	785.907	2	13	1.1.1.2958.11	1	66.7985	7113.75	66.4465
14	23.07	23.07	5.978	4.078	3.8	sp|Q15149|PLEC_HUMAN	Plectin OS=Homo sapiens GN=PLEC PE=1 SV=3			0	99	DDGTGQLLLPLSDAR			-0.00684121	1569.79	785.904	1569.8	785.907	2	10	1.1.1.2942.8	1	66.1207	1828.89	66.1115
14	23.07	23.07	5.978	4.078	3.8	sp|Q15149|PLEC_HUMAN	Plectin OS=Homo sapiens GN=PLEC PE=1 SV=3			0	99	DSQDAGGFGPEDR			0.00161006	1349.55	675.782	1349.55	675.781	2	13	1.1.1.2009.13	1	26.9338	5689.28	26.5403
14	23.07	23.07	5.978	4.078	3.8	sp|Q15149|PLEC_HUMAN	Plectin OS=Homo sapiens GN=PLEC PE=1 SV=3			0	98.65	ELAEQELEK			-0.00126247	1087.54	544.777	1087.54	544.777	2	7	1.1.1.2020.5	0	27.3756	5414.56	27.6609
14	23.07	23.07	5.978	4.078	3.8	sp|Q15149|PLEC_HUMAN	Plectin OS=Homo sapiens GN=PLEC PE=1 SV=3			0	99	ESADPLGAWLQDAR			0.00185487	1527.73	764.874	1527.73	764.873	2	8	1.1.1.3143.4	1	74.6194	404.64	74.6129
14	23.07	23.07	5.978	4.078	3.8	sp|Q15149|PLEC_HUMAN	Plectin OS=Homo sapiens GN=PLEC PE=1 SV=3			0	99	LLDPEDVDVPQPDEK			-0.0187198	1707.8	854.908	1707.82	854.917	2	13	1.1.1.2608.16	1	52.0686	19841.6	51.7994
14	23.07	23.07	5.978	4.078	3.8	sp|Q15149|PLEC_HUMAN	Plectin OS=Homo sapiens GN=PLEC PE=1 SV=3			0	27.52	SSSVGSSSSYPISPAVSR	Phospho(S)@7		0.00808698	1833.82	917.919	1833.81	917.915	2	6	1.1.1.2362.33	1	41.7323	2345.38	42.1204
15	23.01	23.01	34.55	31.55	25.54	sp|P08670|VIME_HUMAN	Vimentin OS=Homo sapiens GN=VIM PE=1 SV=4			2	99	DGQVINETSQHHDDLE			0.00325971	1835.8	918.905	1835.79	918.903	2	16	1.1.1.2057.27	1	28.9425	57380.1	28.4951
15	23.01	23.01	34.55	31.55	25.54	sp|P08670|VIME_HUMAN	Vimentin OS=Homo sapiens GN=VIM PE=1 SV=4			2	99	DNLAEDIMR			-0.000489288	1075.5	538.755	1075.5	538.756	2	9	1.1.1.2722.3	1	56.8464	2891.05	56.756
15	23.01	23.01	34.55	31.55	25.54	sp|P08670|VIME_HUMAN	Vimentin OS=Homo sapiens GN=VIM PE=1 SV=4			2	99	EEAENTLQSFR			-0.00195451	1322.61	662.311	1322.61	662.312	2	11	1.1.1.2340.13	1	40.7972	37858.9	40.362
15	23.01	23.01	34.55	31.55	25.54	sp|P08670|VIME_HUMAN	Vimentin OS=Homo sapiens GN=VIM PE=1 SV=4			2	99	FADLSEAANR			-0.00154326	1092.52	547.266	1092.52	547.267	2	11	1.1.1.2154.5	1	32.9788	6456.52	32.8454
15	23.01	23.01	34.55	31.55	25.54	sp|P08670|VIME_HUMAN	Vimentin OS=Homo sapiens GN=VIM PE=1 SV=4			2	99	LGDLYEEEMR			-0.00140397	1253.56	627.787	1253.56	627.787	2	12	1.1.1.2452.12	1	45.4991	36830.5	45.1514
15	23.01	23.01	34.55	31.55	25.54	sp|P08670|VIME_HUMAN	Vimentin OS=Homo sapiens GN=VIM PE=1 SV=4			2	99	QVQSLTCEVDALKGTNESLER	Gln->pyro-Glu@N-term; Carbamidomethyl(C)@7	missed K-G@13	-0.00327191	2359.13	1180.57	2359.13	1180.57	2	15	1.1.1.3084.34	1	72.1392	4355.82	72.2348
15	23.01	23.01	34.55	31.55	25.54	sp|P08670|VIME_HUMAN	Vimentin OS=Homo sapiens GN=VIM PE=1 SV=4			2	99	SLYASSPGGVYATR	Phospho(S)@6		-0.00123458	1507.67	754.842	1507.67	754.843	2	11	1.1.1.2417.17	1	44.0315	3325.57	43.7202
15	23.01	23.01	34.55	31.55	25.54	sp|P08670|VIME_HUMAN	Vimentin OS=Homo sapiens GN=VIM PE=1 SV=4			2	99	TNEKVELQELNDR		missed K-V@4	-0.000953186	1586.79	794.402	1586.79	794.402	2	15	1.1.1.2187.27	1	34.3784	20723.1	34.0192
15	23.01	23.01	34.55	31.55	25.54	sp|P08670|VIME_HUMAN	Vimentin OS=Homo sapiens GN=VIM PE=1 SV=4			2	99	VELQELNDR	Deamidated(N)@7		-0.000250578	1115.55	558.78	1115.55	558.78	2	9	1.1.1.2288.7	1	38.602	3211.79	39.0118
15	23.01	23.01	34.55	31.55	25.54	sp|P08670|VIME_HUMAN	Vimentin OS=Homo sapiens GN=VIM PE=1 SV=4			2	99	VEVERDNLAEDIMR		missed R-D@5	0.000773628	1687.82	563.614	1687.82	563.614	3	10	1.1.1.2584.3	1	51.0433	5862.42	51.2071
15	23.01	23.01	34.55	31.55	25.54	sp|P08670|VIME_HUMAN	Vimentin OS=Homo sapiens GN=VIM PE=1 SV=4			1.33724	98.95	NLQEAEEWYK	Deamidated(N)@1		-0.00131955	1309.58	655.798	1309.58	655.799	2	9	1.1.1.2856.4	1	62.4822	2858.43	62.4758
15	23.01	23.01	34.55	31.55	25.54	sp|P08670|VIME_HUMAN	Vimentin OS=Homo sapiens GN=VIM PE=1 SV=4			1.18046	93.84	EMEENFAVEAANYQDTIGR			0.00713563	2185.97	1093.99	2185.96	1093.99	2	10	1.1.1.2924.32	1	65.3826	6558.52	65.3952
15	23.01	23.01	34.55	31.55	25.54	sp|P08670|VIME_HUMAN	Vimentin OS=Homo sapiens GN=VIM PE=1 SV=4			0.328827	54.8	EYQDLLNVK			-0.00321613	1120.57	561.294	1120.58	561.295	2	7	1.1.1.2516.3	1	48.1815	2583.01	48.3446
15	23.01	23.01	34.55	31.55	25.54	sp|P08670|VIME_HUMAN	Vimentin OS=Homo sapiens GN=VIM PE=1 SV=4			0.163043	32.86	LQDEIQNMKEEMAR		missed K-E@9	0.00768802	1733.82	578.946	1733.81	578.943	3	5	1.1.1.2475.2	1	46.4574	1086.46	46.453
15	23.01	23.01	34.55	31.55	25.54	sp|P08670|VIME_HUMAN	Vimentin OS=Homo sapiens GN=VIM PE=1 SV=4			0	99	DGQVINETSQHHDDLE			0.000818302	1835.79	918.904	1835.79	918.903	2	15	1.1.1.2049.31	1	28.6127	56794.6	28.5366
15	23.01	23.01	34.55	31.55	25.54	sp|P08670|VIME_HUMAN	Vimentin OS=Homo sapiens GN=VIM PE=1 SV=4			0	52.39	DGQVINETSQHHDDLE			0.00142865	1835.79	918.904	1835.79	918.903	2	6	1.1.1.2104.30	1	30.9061	1353.32	30.8365
15	23.01	23.01	34.55	31.55	25.54	sp|P08670|VIME_HUMAN	Vimentin OS=Homo sapiens GN=VIM PE=1 SV=4			0	20.69	DGQVINETSQHHDDLE			0.000452091	1835.79	918.904	1835.79	918.903	2	6	1.1.1.2093.36	1	30.4481	1086.73	30.2885
15	23.01	23.01	34.55	31.55	25.54	sp|P08670|VIME_HUMAN	Vimentin OS=Homo sapiens GN=VIM PE=1 SV=4			0	18.34	DGQVINETSQHHDDLE			0.000234471	1835.79	612.938	1835.79	612.938	3	8	1.1.1.2041.18	1	28.2635	28400.4	28.5366
15	23.01	23.01	34.55	31.55	25.54	sp|P08670|VIME_HUMAN	Vimentin OS=Homo sapiens GN=VIM PE=1 SV=4			0	98.7	DNLAEDIMR			-0.000489288	1075.5	538.755	1075.5	538.756	2	7	1.1.1.2714.2	1	56.5069	2891.05	56.756
15	23.01	23.01	34.55	31.55	25.54	sp|P08670|VIME_HUMAN	Vimentin OS=Homo sapiens GN=VIM PE=1 SV=4			0	99	EEAENTLQSFR			-0.00195451	1322.61	662.311	1322.61	662.312	2	12	1.1.1.2332.13	1	40.4602	38214.1	40.362
15	23.01	23.01	34.55	31.55	25.54	sp|P08670|VIME_HUMAN	Vimentin OS=Homo sapiens GN=VIM PE=1 SV=4			0	99	EEAENTLQSFR	Deamidated(N)@5		-0.00195868	1323.59	662.803	1323.59	662.804	2	10	1.1.1.2254.18	1	37.1889	3149.99	37.171
15	23.01	23.01	34.55	31.55	25.54	sp|P08670|VIME_HUMAN	Vimentin OS=Homo sapiens GN=VIM PE=1 SV=4			0	98.99	EEAENTLQSFR			-0.00195451	1322.61	662.311	1322.61	662.312	2	11	1.1.1.2324.16	1	40.1253	38214.1	40.362
15	23.01	23.01	34.55	31.55	25.54	sp|P08670|VIME_HUMAN	Vimentin OS=Homo sapiens GN=VIM PE=1 SV=4			0	93.18	EEAENTLQSFR			-0.0024428	1322.61	662.311	1322.61	662.312	2	7	1.1.1.2204.17	1	35.0844	1067.9	34.983
15	23.01	23.01	34.55	31.55	25.54	sp|P08670|VIME_HUMAN	Vimentin OS=Homo sapiens GN=VIM PE=1 SV=4			0	26.12	EEAENTLQSFR			-0.0120864	1322.6	662.306	1322.61	662.312	2	6	1.1.1.2355.12	1	41.4222	1069.98	41.535
15	23.01	23.01	34.55	31.55	25.54	sp|P08670|VIME_HUMAN	Vimentin OS=Homo sapiens GN=VIM PE=1 SV=4			0	48.51	EMEENFAVEAANYQDTIGR			0.00713563	2185.97	1093.99	2185.96	1093.99	2	9	1.1.1.2938.30	1	65.9716	3022.03	65.902
15	23.01	23.01	34.55	31.55	25.54	sp|P08670|VIME_HUMAN	Vimentin OS=Homo sapiens GN=VIM PE=1 SV=4			0	44.92	EMEENFAVEAANYQDTIGR			0.00304761	2185.96	1093.99	2185.96	1093.99	2	6	1.1.1.3065.26	1	71.3301	925.713	71.2641
15	23.01	23.01	34.55	31.55	25.54	sp|P08670|VIME_HUMAN	Vimentin OS=Homo sapiens GN=VIM PE=1 SV=4			0	17.13	EMEENFAVEAANYQDTIGR			0.00322938	2185.96	1093.99	2185.96	1093.99	2	8	1.1.1.2951.32	1	66.5184	1680.72	66.4045
15	23.01	23.01	34.55	31.55	25.54	sp|P08670|VIME_HUMAN	Vimentin OS=Homo sapiens GN=VIM PE=1 SV=4			0	98.37	FADLSEAANR			-0.00190947	1092.52	547.266	1092.52	547.267	2	11	1.1.1.2146.8	1	32.6446	6327.05	32.7193
15	23.01	23.01	34.55	31.55	25.54	sp|P08670|VIME_HUMAN	Vimentin OS=Homo sapiens GN=VIM PE=1 SV=4			0	79.95	FADLSEAANR			-0.00410674	1092.52	547.265	1092.52	547.267	2	8	1.1.1.2138.3	1	32.3065	4533.16	32.5516
15	23.01	23.01	34.55	31.55	25.54	sp|P08670|VIME_HUMAN	Vimentin OS=Homo sapiens GN=VIM PE=1 SV=4			0	26.37	FADLSEAANR	Deamidated(N)@9		-0.000192885	1093.5	547.759	1093.5	547.759	2	6	1.1.1.2202.8	1	34.9925	1607.58	35.1095
15	23.01	23.01	34.55	31.55	25.54	sp|P08670|VIME_HUMAN	Vimentin OS=Homo sapiens GN=VIM PE=1 SV=4			0	99	LGDLYEEEMR			-0.00140397	1253.56	627.787	1253.56	627.787	2	10	1.1.1.2436.11	1	44.8275	36670.9	45.1514
15	23.01	23.01	34.55	31.55	25.54	sp|P08670|VIME_HUMAN	Vimentin OS=Homo sapiens GN=VIM PE=1 SV=4			0	99	LGDLYEEEMR			-0.00140397	1253.56	627.787	1253.56	627.787	2	12	1.1.1.2444.7	1	45.1598	36830.5	45.1514
15	23.01	23.01	34.55	31.55	25.54	sp|P08670|VIME_HUMAN	Vimentin OS=Homo sapiens GN=VIM PE=1 SV=4			0	99	LGDLYEEEMR	Oxidation(M)@9		0.00168716	1269.56	635.785	1269.55	635.785	2	9	1.1.1.2222.10	1	35.838	2169.85	35.8689
15	23.01	23.01	34.55	31.55	25.54	sp|P08670|VIME_HUMAN	Vimentin OS=Homo sapiens GN=VIM PE=1 SV=4			0	54.27	LGDLYEEEMR			0.00140365	1253.56	627.788	1253.56	627.787	2	6	1.1.1.2477.9	1	46.5469	691.111	46.5787
15	23.01	23.01	34.55	31.55	25.54	sp|P08670|VIME_HUMAN	Vimentin OS=Homo sapiens GN=VIM PE=1 SV=4			0	50.57	NLQEAEEWYK			0.00310963	1308.6	655.308	1308.6	655.307	2	6	1.1.1.2540.10	1	49.1979	2249.4	49.0611
15	23.01	23.01	34.55	31.55	25.54	sp|P08670|VIME_HUMAN	Vimentin OS=Homo sapiens GN=VIM PE=1 SV=4			0	99	QVQSLTCEVDALKGTNESLER	Gln->pyro-Glu@N-term; Carbamidomethyl(C)@7	missed K-G@13	-0.00327191	2359.13	1180.57	2359.13	1180.57	2	12	1.1.1.3092.38	1	72.4821	4355.82	72.2348
15	23.01	23.01	34.55	31.55	25.54	sp|P08670|VIME_HUMAN	Vimentin OS=Homo sapiens GN=VIM PE=1 SV=4			0	44.52	QVQSLTCEVDALKGTNESLER	Carbamidomethyl(C)@7	missed K-G@13	0.00151084	2376.16	793.061	2376.16	793.06	3	8	1.1.1.2724.19	1	56.9442	5715.91	57.0946
15	23.01	23.01	34.55	31.55	25.54	sp|P08670|VIME_HUMAN	Vimentin OS=Homo sapiens GN=VIM PE=1 SV=4			0	33.82	QVQSLTCEVDALKGTNESLER	Carbamidomethyl(C)@7	missed K-G@13	0.00151084	2376.16	793.061	2376.16	793.06	3	7	1.1.1.2732.17	1	57.2815	5715.91	57.0946
15	23.01	23.01	34.55	31.55	25.54	sp|P08670|VIME_HUMAN	Vimentin OS=Homo sapiens GN=VIM PE=1 SV=4			0	99	SLYASSPGGVYATR	Phospho(S)@6		-0.00123458	1507.67	754.842	1507.67	754.843	2	14	1.1.1.2409.20	1	43.6976	3325.57	43.7202
15	23.01	23.01	34.55	31.55	25.54	sp|P08670|VIME_HUMAN	Vimentin OS=Homo sapiens GN=VIM PE=1 SV=4			0	86.81	SLYASSPGGVYATR	Phospho(S)@1		-0.00111251	1507.67	754.842	1507.67	754.843	2	8	1.1.1.2401.24	1	43.3646	3436.59	43.7622
15	23.01	23.01	34.55	31.55	25.54	sp|P08670|VIME_HUMAN	Vimentin OS=Homo sapiens GN=VIM PE=1 SV=4			0	99	TNEKVELQELNDR		missed K-V@4	-0.000953186	1586.79	794.402	1586.79	794.402	2	13	1.1.1.2171.26	1	33.7099	20639.7	34.0192
15	23.01	23.01	34.55	31.55	25.54	sp|P08670|VIME_HUMAN	Vimentin OS=Homo sapiens GN=VIM PE=1 SV=4			0	99	TNEKVELQELNDR		missed K-V@4	-0.000953186	1586.79	794.402	1586.79	794.402	2	19	1.1.1.2179.23	1	34.0407	20723.1	34.0192
15	23.01	23.01	34.55	31.55	25.54	sp|P08670|VIME_HUMAN	Vimentin OS=Homo sapiens GN=VIM PE=1 SV=4			0	99	TNEKVELQELNDR		missed K-V@4	-0.00119733	1586.79	794.402	1586.79	794.402	2	10	1.1.1.2195.23	1	34.7105	4639.59	34.2699
15	23.01	23.01	34.55	31.55	25.54	sp|P08670|VIME_HUMAN	Vimentin OS=Homo sapiens GN=VIM PE=1 SV=4			0	99	TNEKVELQELNDR		missed K-V@4	0.00223941	1586.79	529.938	1586.79	529.937	3	9	1.1.1.2193.4	1	34.6107	10938.4	34.1862
15	23.01	23.01	34.55	31.55	25.54	sp|P08670|VIME_HUMAN	Vimentin OS=Homo sapiens GN=VIM PE=1 SV=4			0	98.76	TNEKVELQELNDR	Deamidated(N)@11	missed K-V@4	0.013447	1587.79	794.901	1587.77	794.894	2	10	1.1.1.2168.22	1	33.5816	7084.06	33.9775
15	23.01	23.01	34.55	31.55	25.54	sp|P08670|VIME_HUMAN	Vimentin OS=Homo sapiens GN=VIM PE=1 SV=4			0	90.07	TNEKVELQELNDR	Deamidated(N)@11	missed K-V@4	-0.00632847	1587.77	794.891	1587.77	794.894	2	8	1.1.1.2253.28	1	37.1551	2800.78	36.8762
15	23.01	23.01	34.55	31.55	25.54	sp|P08670|VIME_HUMAN	Vimentin OS=Homo sapiens GN=VIM PE=1 SV=4			0	59.61	TNEKVELQELNDR	Deamidated(N)@11	missed K-V@4	-0.00632847	1587.77	794.891	1587.77	794.894	2	9	1.1.1.2244.31	1	36.7784	2800.78	36.8762
15	23.01	23.01	34.55	31.55	25.54	sp|P08670|VIME_HUMAN	Vimentin OS=Homo sapiens GN=VIM PE=1 SV=4			0	37.74	TNEKVELQELNDR	Deamidated(Q)@8	missed K-V@4	0.0163344	1587.79	530.271	1587.77	530.265	3	9	1.1.1.2172.3	1	33.7324	10678.4	34.0192
15	23.01	23.01	34.55	31.55	25.54	sp|P08670|VIME_HUMAN	Vimentin OS=Homo sapiens GN=VIM PE=1 SV=4			0	33.79	TNEKVELQELNDR	Deamidated(N)@2	missed K-V@4	0.00608049	1587.78	530.267	1587.77	530.265	3	5	1.1.1.2298.2	1	39.0161	1980.88	39.0961
15	23.01	23.01	34.55	31.55	25.54	sp|P08670|VIME_HUMAN	Vimentin OS=Homo sapiens GN=VIM PE=1 SV=4			0	99	VELQELNDR			-0.000246425	1114.56	558.288	1114.56	558.288	2	9	1.1.1.2232.6	1	36.2541	23820.8	35.8269
15	23.01	23.01	34.55	31.55	25.54	sp|P08670|VIME_HUMAN	Vimentin OS=Homo sapiens GN=VIM PE=1 SV=4			0	99	VELQELNDR			-0.00427476	1114.56	558.286	1114.56	558.288	2	8	1.1.1.2240.8	1	36.5906	1898.76	36.3717
15	23.01	23.01	34.55	31.55	25.54	sp|P08670|VIME_HUMAN	Vimentin OS=Homo sapiens GN=VIM PE=1 SV=4			0	99	VELQELNDR	Deamidated(N)@7		-0.000494719	1115.55	558.78	1115.55	558.78	2	10	1.1.1.2297.8	1	38.9791	3242.71	38.9698
15	23.01	23.01	34.55	31.55	25.54	sp|P08670|VIME_HUMAN	Vimentin OS=Homo sapiens GN=VIM PE=1 SV=4			0	99	VELQELNDR			-0.000246425	1114.56	558.288	1114.56	558.288	2	11	1.1.1.2216.13	1	35.5875	44401	35.6159
15	23.01	23.01	34.55	31.55	25.54	sp|P08670|VIME_HUMAN	Vimentin OS=Homo sapiens GN=VIM PE=1 SV=4			0	90.32	VELQELNDR			-0.000246425	1114.56	558.288	1114.56	558.288	2	10	1.1.1.2224.5	1	35.918	44401	35.6159
15	23.01	23.01	34.55	31.55	25.54	sp|P08670|VIME_HUMAN	Vimentin OS=Homo sapiens GN=VIM PE=1 SV=4			0	72.47	VELQELNDR			-0.000246425	1114.56	558.288	1114.56	558.288	2	9	1.1.1.2208.9	1	35.2463	43982	35.6581
16	22.56	22.56	33.96	24.06	24.06	sp|P20700|LMNB1_HUMAN	Lamin-B1 OS=Homo sapiens GN=LMNB1 PE=1 SV=2			2	99	ALYETELADAR			-0.001568	1250.61	626.314	1250.61	626.314	2	15	1.1.1.2416.8	1	43.982	51137.1	43.9305
16	22.56	22.56	33.96	24.06	24.06	sp|P20700|LMNB1_HUMAN	Lamin-B1 OS=Homo sapiens GN=LMNB1 PE=1 SV=2			2	99	CQSLTEDLEFR	Carbamidomethyl(C)@1		-0.00270555	1396.63	699.321	1396.63	699.322	2	10	1.1.1.2724.9	1	56.9359	3580.6	57.1795
16	22.56	22.56	33.96	24.06	24.06	sp|P20700|LMNB1_HUMAN	Lamin-B1 OS=Homo sapiens GN=LMNB1 PE=1 SV=2			2	99	DAALATALGDK			-0.00728108	1044.54	523.276	1044.55	523.28	2	12	1.1.1.2308.2	1	39.4381	2763.45	39.4757
16	22.56	22.56	33.96	24.06	24.06	sp|P20700|LMNB1_HUMAN	Lamin-B1 OS=Homo sapiens GN=LMNB1 PE=1 SV=2			2	99	DAALATALGDKK		missed K-K@11	-9.87327e-05	1172.64	587.327	1172.64	587.327	2	11	1.1.1.2068.11	1	29.3768	1023.1	29.3241
16	22.56	22.56	33.96	24.06	24.06	sp|P20700|LMNB1_HUMAN	Lamin-B1 OS=Homo sapiens GN=LMNB1 PE=1 SV=2			2	99	DQMQQQLNDYEQLLDVK			-0.00672648	2106.98	1054.5	2106.99	1054.5	2	16	1.1.1.3031.29	1	69.9067	8520.25	69.8791
16	22.56	22.56	33.96	24.06	24.06	sp|P20700|LMNB1_HUMAN	Lamin-B1 OS=Homo sapiens GN=LMNB1 PE=1 SV=2			2	99	IQELEDLLAK			0.000127736	1170.65	586.332	1170.65	586.332	2	11	1.1.1.2839.2	1	61.7639	4802.86	61.7172
16	22.56	22.56	33.96	24.06	24.06	sp|P20700|LMNB1_HUMAN	Lamin-B1 OS=Homo sapiens GN=LMNB1 PE=1 SV=2			2	99	KSMYEEEINETR		missed K-S@1	0.00450448	1527.69	764.853	1527.69	764.851	2	9	1.1.1.2103.28	1	30.8626	1548.39	30.9203
16	22.56	22.56	33.96	24.06	24.06	sp|P20700|LMNB1_HUMAN	Lamin-B1 OS=Homo sapiens GN=LMNB1 PE=1 SV=2			2	99	LKLSPSPSSR	Phospho(S)@4	missed K-L@2	-0.00177862	1150.57	576.294	1150.57	576.295	2	12	1.1.1.1934.7	0	23.7894	6465.27	23.9909
16	22.56	22.56	33.96	24.06	24.06	sp|P20700|LMNB1_HUMAN	Lamin-B1 OS=Homo sapiens GN=LMNB1 PE=1 SV=2			2	99	NQNSWGTGEDVK	Deamidated(N)@1		0.00296268	1334.58	668.296	1334.57	668.294	2	13	1.1.1.2127.17	1	31.859	8155.66	31.9683
16	22.56	22.56	33.96	24.06	24.06	sp|P20700|LMNB1_HUMAN	Lamin-B1 OS=Homo sapiens GN=LMNB1 PE=1 SV=2			2	99	SLETENSALQLQVTER	Deamidated(N)@6		-0.0123579	1817.89	909.951	1817.9	909.958	2	14	1.1.1.2572.32	1	50.5602	1760.99	50.5307
16	22.56	22.56	33.96	24.06	24.06	sp|P20700|LMNB1_HUMAN	Lamin-B1 OS=Homo sapiens GN=LMNB1 PE=1 SV=2			2	99	TTIPEEEEEEEEAAGVVVEEELFHQQGTPR			0.00803822	3410.57	1137.87	3410.56	1137.86	3	14	1.1.1.3186.30	1	76.4713	31974.2	76.4856
16	22.56	22.56	33.96	24.06	24.06	sp|P20700|LMNB1_HUMAN	Lamin-B1 OS=Homo sapiens GN=LMNB1 PE=1 SV=2			0.465974	90.61	SMYEEEINETR	Oxidation(M)@2		0.00360868	1415.59	708.803	1415.59	708.801	2	7	1.1.1.2093.22	1	30.4364	1035.5	30.2464
16	22.56	22.56	33.96	24.06	24.06	sp|P20700|LMNB1_HUMAN	Lamin-B1 OS=Homo sapiens GN=LMNB1 PE=1 SV=2			0.0710923	31.9	LSPSPSSRVTVSR	Phospho(S)@2; Phospho(S)@12	missed R-V@8	-0.0103108	1531.67	766.842	1531.68	766.847	2	7	1.1.1.2721.9	0	56.809	2083.84	56.9255
16	22.56	22.56	33.96	24.06	24.06	sp|P20700|LMNB1_HUMAN	Lamin-B1 OS=Homo sapiens GN=LMNB1 PE=1 SV=2			0	99	ALYETELADAR			-0.00107972	1250.61	626.314	1250.61	626.314	2	11	1.1.1.2424.12	1	44.3227	27294	44.1832
16	22.56	22.56	33.96	24.06	24.06	sp|P20700|LMNB1_HUMAN	Lamin-B1 OS=Homo sapiens GN=LMNB1 PE=1 SV=2			0	97.26	ALYETELADAR			-0.001568	1250.61	626.314	1250.61	626.314	2	10	1.1.1.2408.10	1	43.6471	21413.7	43.7202
16	22.56	22.56	33.96	24.06	24.06	sp|P20700|LMNB1_HUMAN	Lamin-B1 OS=Homo sapiens GN=LMNB1 PE=1 SV=2			0	99	CQSLTEDLEFR	Carbamidomethyl(C)@1		-0.00270555	1396.63	699.321	1396.63	699.322	2	11	1.1.1.2732.7	1	57.2732	3580.6	57.1795
16	22.56	22.56	33.96	24.06	24.06	sp|P20700|LMNB1_HUMAN	Lamin-B1 OS=Homo sapiens GN=LMNB1 PE=1 SV=2			0	99	CQSLTEDLEFR	Carbamidomethyl(C)@1; Deamidated(Q)@2		0.00364289	1397.62	699.816	1397.61	699.814	2	9	1.1.1.2852.4	1	62.3131	1031.37	62.3065
16	22.56	22.56	33.96	24.06	24.06	sp|P20700|LMNB1_HUMAN	Lamin-B1 OS=Homo sapiens GN=LMNB1 PE=1 SV=2			0	97.12	CQSLTEDLEFR	Carbamidomethyl(C)@1; Deamidated(Q)@2		0.00364289	1397.62	699.816	1397.61	699.814	2	9	1.1.1.2842.6	1	61.8938	749.097	61.8016
16	22.56	22.56	33.96	24.06	24.06	sp|P20700|LMNB1_HUMAN	Lamin-B1 OS=Homo sapiens GN=LMNB1 PE=1 SV=2			0	99	DAALATALGDKK		missed K-K@11	-0.002296	1172.64	587.326	1172.64	587.327	2	10	1.1.1.2058.9	1	28.9607	2366.01	29.1169
16	22.56	22.56	33.96	24.06	24.06	sp|P20700|LMNB1_HUMAN	Lamin-B1 OS=Homo sapiens GN=LMNB1 PE=1 SV=2			0	99	DQMQQQLNDYEQLLDVK	Deamidated(N)@8		-0.0019731	2107.97	1054.99	2107.97	1054.99	2	19	1.1.1.3023.29	1	69.5659	24442.7	69.7086
16	22.56	22.56	33.96	24.06	24.06	sp|P20700|LMNB1_HUMAN	Lamin-B1 OS=Homo sapiens GN=LMNB1 PE=1 SV=2			0	99	DQMQQQLNDYEQLLDVK	Oxidation(M)@3		0.000546934	2122.99	1062.5	2122.98	1062.5	2	16	1.1.1.3096.29	1	72.6442	10683.2	72.617
16	22.56	22.56	33.96	24.06	24.06	sp|P20700|LMNB1_HUMAN	Lamin-B1 OS=Homo sapiens GN=LMNB1 PE=1 SV=2			0	99	DQMQQQLNDYEQLLDVK			0.00133015	2106.99	1054.5	2106.99	1054.5	2	21	1.1.1.3174.23	1	75.9537	94356.6	76.0161
16	22.56	22.56	33.96	24.06	24.06	sp|P20700|LMNB1_HUMAN	Lamin-B1 OS=Homo sapiens GN=LMNB1 PE=1 SV=2			0	99	DQMQQQLNDYEQLLDVK			0.00133015	2106.99	1054.5	2106.99	1054.5	2	18	1.1.1.3184.25	1	76.3817	94356.6	76.0161
16	22.56	22.56	33.96	24.06	24.06	sp|P20700|LMNB1_HUMAN	Lamin-B1 OS=Homo sapiens GN=LMNB1 PE=1 SV=2			0	96.77	DQMQQQLNDYEQLLDVK			-0.00306437	2106.99	1054.5	2106.99	1054.5	2	11	1.1.1.3203.28	1	77.1896	3011.03	77.1631
16	22.56	22.56	33.96	24.06	24.06	sp|P20700|LMNB1_HUMAN	Lamin-B1 OS=Homo sapiens GN=LMNB1 PE=1 SV=2			0	88.56	DQMQQQLNDYEQLLDVK			0.00157429	2106.99	1054.5	2106.99	1054.5	2	10	1.1.1.3194.13	1	76.8025	7415.52	76.571
16	22.56	22.56	33.96	24.06	24.06	sp|P20700|LMNB1_HUMAN	Lamin-B1 OS=Homo sapiens GN=LMNB1 PE=1 SV=2			0	78.49	DQMQQQLNDYEQLLDVK			-0.00247537	2106.99	1054.5	2106.99	1054.5	2	8	1.1.1.3222.12	1	77.9893	1137.61	77.8419
16	22.56	22.56	33.96	24.06	24.06	sp|P20700|LMNB1_HUMAN	Lamin-B1 OS=Homo sapiens GN=LMNB1 PE=1 SV=2			0	76.71	DQMQQQLNDYEQLLDVK			-0.0134617	2106.98	1054.49	2106.99	1054.5	2	7	1.1.1.3519.20	1	90.3344	159.199	90.1301
16	22.56	22.56	33.96	24.06	24.06	sp|P20700|LMNB1_HUMAN	Lamin-B1 OS=Homo sapiens GN=LMNB1 PE=1 SV=2			0	97.63	IQELEDLLAK			0.000127736	1170.65	586.332	1170.65	586.332	2	8	1.1.1.2831.2	1	61.4261	4802.86	61.7172
16	22.56	22.56	33.96	24.06	24.06	sp|P20700|LMNB1_HUMAN	Lamin-B1 OS=Homo sapiens GN=LMNB1 PE=1 SV=2			0	96.58	KSMYEEEINETR		missed K-S@1	0.00274765	1527.69	510.237	1527.69	510.236	3	7	1.1.1.2107.6	1	31.0122	3629.22	30.9203
16	22.56	22.56	33.96	24.06	24.06	sp|P20700|LMNB1_HUMAN	Lamin-B1 OS=Homo sapiens GN=LMNB1 PE=1 SV=2			0	97.13	LKLSPSPSSR	Phospho(S)@4; Phospho(S)@6	missed K-L@2	0.00122515	1230.54	616.278	1230.54	616.278	2	10	1.1.1.2029.15	0	27.7599	6143.58	27.4937
16	22.56	22.56	33.96	24.06	24.06	sp|P20700|LMNB1_HUMAN	Lamin-B1 OS=Homo sapiens GN=LMNB1 PE=1 SV=2			0	83.1	LKLSPSPSSR	Phospho(S)@4; Phospho(S)@6	missed K-L@2	0.00244585	1230.54	616.279	1230.54	616.278	2	8	1.1.1.2037.11	0	28.0906	4422.09	27.6609
16	22.56	22.56	33.96	24.06	24.06	sp|P20700|LMNB1_HUMAN	Lamin-B1 OS=Homo sapiens GN=LMNB1 PE=1 SV=2			0	49.89	LKLSPSPSSR	Phospho(S)@4	missed K-L@2	0.00298213	1150.58	576.296	1150.57	576.295	2	8	1.1.1.1926.5	0	23.4525	3569.78	23.6129
16	22.56	22.56	33.96	24.06	24.06	sp|P20700|LMNB1_HUMAN	Lamin-B1 OS=Homo sapiens GN=LMNB1 PE=1 SV=2			0	99	NQNSWGTGEDVK			-0.000815797	1333.59	667.802	1333.59	667.802	2	10	1.1.1.1969.12	1	25.2612	7681.32	25.4981
16	22.56	22.56	33.96	24.06	24.06	sp|P20700|LMNB1_HUMAN	Lamin-B1 OS=Homo sapiens GN=LMNB1 PE=1 SV=2			0	99	NQNSWGTGEDVK			-0.000815797	1333.59	667.802	1333.59	667.802	2	12	1.1.1.1977.20	1	25.601	7681.32	25.4981
16	22.56	22.56	33.96	24.06	24.06	sp|P20700|LMNB1_HUMAN	Lamin-B1 OS=Homo sapiens GN=LMNB1 PE=1 SV=2			0	95.14	NQNSWGTGEDVK	Deamidated(N)@3		0.000887482	1334.57	668.295	1334.57	668.294	2	11	1.1.1.2010.20	1	26.9768	2515.56	26.8311
16	22.56	22.56	33.96	24.06	24.06	sp|P20700|LMNB1_HUMAN	Lamin-B1 OS=Homo sapiens GN=LMNB1 PE=1 SV=2			0	80.2	NQNSWGTGEDVK	Deamidated(N)@1		0.013949	1334.59	668.301	1334.57	668.294	2	8	1.1.1.2062.15	1	29.1317	1743.5	29.1584
16	22.56	22.56	33.96	24.06	24.06	sp|P20700|LMNB1_HUMAN	Lamin-B1 OS=Homo sapiens GN=LMNB1 PE=1 SV=2			0	99	SLETENSALQLQVTER			-0.0106756	1816.91	909.46	1816.92	909.466	2	14	1.1.1.2591.28	1	51.3603	3268.82	51.334
16	22.56	22.56	33.96	24.06	24.06	sp|P20700|LMNB1_HUMAN	Lamin-B1 OS=Homo sapiens GN=LMNB1 PE=1 SV=2			0	99	SLETENSALQLQVTER			-0.0106756	1816.91	909.46	1816.92	909.466	2	12	1.1.1.2599.28	1	51.6988	3268.82	51.334
16	22.56	22.56	33.96	24.06	24.06	sp|P20700|LMNB1_HUMAN	Lamin-B1 OS=Homo sapiens GN=LMNB1 PE=1 SV=2			0	99	SLETENSALQLQVTER			-0.0106756	1816.91	909.46	1816.92	909.466	2	11	1.1.1.2595.31	1	51.5322	3268.82	51.334
16	22.56	22.56	33.96	24.06	24.06	sp|P20700|LMNB1_HUMAN	Lamin-B1 OS=Homo sapiens GN=LMNB1 PE=1 SV=2			0	46.86	SMYEEEINETR	Deamidated(N)@8		-0.0122528	1400.56	701.289	1400.58	701.296	2	9	1.1.1.2228.24	1	36.102	1436.51	35.8689
16	22.56	22.56	33.96	24.06	24.06	sp|P20700|LMNB1_HUMAN	Lamin-B1 OS=Homo sapiens GN=LMNB1 PE=1 SV=2			0	44.57	SMYEEEINETR			-0.0101734	1399.58	700.798	1399.59	700.804	2	7	1.1.1.2260.23	1	37.4461	18315.9	37.0025
17	22.16	22.16	24.93	16.06	16.06	sp|P19338|NUCL_HUMAN	Nucleolin OS=Homo sapiens GN=NCL PE=1 SV=3			2	99	EAMEDGEIDGNK			-0.00152292	1306.53	654.274	1306.53	654.275	2	14	1.1.1.1915.17	1	23.0057	142687	22.8634
17	22.16	22.16	24.93	16.06	16.06	sp|P19338|NUCL_HUMAN	Nucleolin OS=Homo sapiens GN=NCL PE=1 SV=3			2	99	EVFEDAAEIR			-0.00109973	1177.56	589.788	1177.56	589.788	2	8	1.1.1.2482.4	1	46.7526	1546.03	46.7465
17	22.16	22.16	24.93	16.06	16.06	sp|P19338|NUCL_HUMAN	Nucleolin OS=Homo sapiens GN=NCL PE=1 SV=3			2	99	FGYVDFESAEDLEK			0.000769747	1647.73	824.873	1647.73	824.872	2	16	1.1.1.2992.11	1	68.2399	61703	67.9736
17	22.16	22.16	24.93	16.06	16.06	sp|P19338|NUCL_HUMAN	Nucleolin OS=Homo sapiens GN=NCL PE=1 SV=3			2	99	GFGFVDFNSEEDAK			0.000131748	1560.67	781.344	1560.67	781.344	2	15	1.1.1.2911.10	1	64.8133	19026.2	64.7594
17	22.16	22.16	24.93	16.06	16.06	sp|P19338|NUCL_HUMAN	Nucleolin OS=Homo sapiens GN=NCL PE=1 SV=3			2	99	GLSEDTTEETLK			-0.000110472	1321.62	661.82	1321.62	661.82	2	14	1.1.1.2126.16	1	31.816	82151.3	31.716
17	22.16	22.16	24.93	16.06	16.06	sp|P19338|NUCL_HUMAN	Nucleolin OS=Homo sapiens GN=NCL PE=1 SV=3			2	99	GLSEDTTEETLKESFDGSVR		missed K-E@12	-0.000370449	2199.02	734.013	2199.02	734.013	3	15	1.1.1.2756.10	1	58.2853	66269.4	58.1058
17	22.16	22.16	24.93	16.06	16.06	sp|P19338|NUCL_HUMAN	Nucleolin OS=Homo sapiens GN=NCL PE=1 SV=3			2	99	KFGYVDFESAEDLEK		missed K-F@1	0.00307768	1775.83	592.95	1775.83	592.949	3	13	1.1.1.2770.2	1	58.8689	27422	58.6532
17	22.16	22.16	24.93	16.06	16.06	sp|P19338|NUCL_HUMAN	Nucleolin OS=Homo sapiens GN=NCL PE=1 SV=3			2	99	LELQGPRGSPNAR	Phospho(S)@9	missed R-G@7	-0.00317362	1473.71	737.86	1473.71	737.862	2	12	1.1.1.1985.19	1	25.9362	2336.36	26.1644
17	22.16	22.16	24.93	16.06	16.06	sp|P19338|NUCL_HUMAN	Nucleolin OS=Homo sapiens GN=NCL PE=1 SV=3			2	99	NDLAVVDVR			-0.000833746	999.534	500.774	999.535	500.775	2	10	1.1.1.2311.3	1	39.5654	2694.77	39.6022
17	22.16	22.16	24.93	16.06	16.06	sp|P19338|NUCL_HUMAN	Nucleolin OS=Homo sapiens GN=NCL PE=1 SV=3			2	99	TEADAEKTFEEK		missed K-T@7	-0.00860891	1396.63	699.321	1396.64	699.325	2	20	1.1.1.1924.17	1	23.3793	241426	23.1973
17	22.16	22.16	24.93	16.06	16.06	sp|P19338|NUCL_HUMAN	Nucleolin OS=Homo sapiens GN=NCL PE=1 SV=3			1.95861	98.98	EAMEDGEIDGNKVTLDWAKPK		missed K-V@12	0.00436355	2345.13	782.716	2345.12	782.714	3	10	1.1.1.2623.19	1	52.7026	22544.4	52.2634
17	22.16	22.16	24.93	16.06	16.06	sp|P19338|NUCL_HUMAN	Nucleolin OS=Homo sapiens GN=NCL PE=1 SV=3			0.173925	34.69	VVVSPTKK	Phospho(S)@4	missed K-K@7	-0.00241893	936.502	469.258	936.505	469.26	2	6	1.1.1.1587.3	1	9.5617	148.178	9.6496
17	22.16	22.16	24.93	16.06	16.06	sp|P19338|NUCL_HUMAN	Nucleolin OS=Homo sapiens GN=NCL PE=1 SV=3			0	99	EAMEDGEIDGNK			-0.00152292	1306.53	654.274	1306.53	654.275	2	12	1.1.1.1907.19	1	22.6723	142687	22.8634
17	22.16	22.16	24.93	16.06	16.06	sp|P19338|NUCL_HUMAN	Nucleolin OS=Homo sapiens GN=NCL PE=1 SV=3			0	99	EAMEDGEIDGNK			-0.000996509	1306.53	654.274	1306.53	654.275	2	12	1.1.1.1923.16	1	23.3411	129824	22.9053
17	22.16	22.16	24.93	16.06	16.06	sp|P19338|NUCL_HUMAN	Nucleolin OS=Homo sapiens GN=NCL PE=1 SV=3			0	99	EAMEDGEIDGNK			0.00327596	1306.54	654.276	1306.53	654.275	2	9	1.1.1.1939.20	1	24.0103	2670.01	24.0329
17	22.16	22.16	24.93	16.06	16.06	sp|P19338|NUCL_HUMAN	Nucleolin OS=Homo sapiens GN=NCL PE=1 SV=3			0	97.7	EAMEDGEIDGNK			-0.000752368	1306.53	654.274	1306.53	654.275	2	10	1.1.1.1931.25	1	23.6785	6252.42	23.4459
17	22.16	22.16	24.93	16.06	16.06	sp|P19338|NUCL_HUMAN	Nucleolin OS=Homo sapiens GN=NCL PE=1 SV=3			0	95.82	EAMEDGEIDGNK	Oxidation(M)@3		-0.00139688	1322.53	662.271	1322.53	662.272	2	10	1.1.1.1913.16	1	22.9212	4403.98	22.9053
17	22.16	22.16	24.93	16.06	16.06	sp|P19338|NUCL_HUMAN	Nucleolin OS=Homo sapiens GN=NCL PE=1 SV=3			0	60	EAMEDGEIDGNK			-0.00197307	1306.53	654.274	1306.53	654.275	2	6	1.1.1.2010.16	1	26.9709	975.736	26.9556
17	22.16	22.16	24.93	16.06	16.06	sp|P19338|NUCL_HUMAN	Nucleolin OS=Homo sapiens GN=NCL PE=1 SV=3			0	16.72	EAMEDGEIDGNK			-0.000508227	1306.53	654.274	1306.53	654.275	2	8	1.1.1.1963.23	1	25.0189	8953.77	25.039
17	22.16	22.16	24.93	16.06	16.06	sp|P19338|NUCL_HUMAN	Nucleolin OS=Homo sapiens GN=NCL PE=1 SV=3			0	98.07	EAMEDGEIDGNKVTLDWAKPK		missed K-V@12	0.00344802	2345.12	782.715	2345.12	782.714	3	11	1.1.1.2612.21	1	52.2416	28372.4	52.1789
17	22.16	22.16	24.93	16.06	16.06	sp|P19338|NUCL_HUMAN	Nucleolin OS=Homo sapiens GN=NCL PE=1 SV=3			0	89.15	EAMEDGEIDGNKVTLDWAKPK		missed K-V@12	0.00344802	2345.12	782.715	2345.12	782.714	3	10	1.1.1.2613.14	1	52.2779	28372.4	52.1789
17	22.16	22.16	24.93	16.06	16.06	sp|P19338|NUCL_HUMAN	Nucleolin OS=Homo sapiens GN=NCL PE=1 SV=3			0	99	EVFEDAAEIR			-0.000489379	1177.56	589.788	1177.56	589.788	2	9	1.1.1.2473.5	1	46.3761	1460.85	46.3692
17	22.16	22.16	24.93	16.06	16.06	sp|P19338|NUCL_HUMAN	Nucleolin OS=Homo sapiens GN=NCL PE=1 SV=3			0	99	EVFEDAAEIR			-0.000489379	1177.56	589.788	1177.56	589.788	2	8	1.1.1.2375.7	1	42.2551	1796.02	41.8276
17	22.16	22.16	24.93	16.06	16.06	sp|P19338|NUCL_HUMAN	Nucleolin OS=Homo sapiens GN=NCL PE=1 SV=3			0	99	EVFEDAAEIR			-0.000123168	1177.56	589.788	1177.56	589.788	2	12	1.1.1.2415.8	1	43.94	193624	44.0988
17	22.16	22.16	24.93	16.06	16.06	sp|P19338|NUCL_HUMAN	Nucleolin OS=Homo sapiens GN=NCL PE=1 SV=3			0	99	EVFEDAAEIR			-0.000123168	1177.56	589.788	1177.56	589.788	2	12	1.1.1.2423.4	1	44.2739	193624	44.0988
17	22.16	22.16	24.93	16.06	16.06	sp|P19338|NUCL_HUMAN	Nucleolin OS=Homo sapiens GN=NCL PE=1 SV=3			0	99	EVFEDAAEIR			-0.000367309	1177.56	589.788	1177.56	589.788	2	12	1.1.1.2439.7	1	44.9503	28000.4	44.5205
17	22.16	22.16	24.93	16.06	16.06	sp|P19338|NUCL_HUMAN	Nucleolin OS=Homo sapiens GN=NCL PE=1 SV=3			0	99	EVFEDAAEIR			0.000243044	1177.56	589.788	1177.56	589.788	2	8	1.1.1.2515.4	1	48.1402	857.78	48.0918
17	22.16	22.16	24.93	16.06	16.06	sp|P19338|NUCL_HUMAN	Nucleolin OS=Homo sapiens GN=NCL PE=1 SV=3			0	99	EVFEDAAEIR			-0.00010961	1177.56	589.788	1177.56	589.788	2	9	1.1.1.2365.3	1	41.8327	1758.83	41.8694
17	22.16	22.16	24.93	16.06	16.06	sp|P19338|NUCL_HUMAN	Nucleolin OS=Homo sapiens GN=NCL PE=1 SV=3			0	99	EVFEDAAEIR			-0.00146594	1177.56	589.787	1177.56	589.788	2	7	1.1.1.2491.5	1	47.132	1266	47.1672
17	22.16	22.16	24.93	16.06	16.06	sp|P19338|NUCL_HUMAN	Nucleolin OS=Homo sapiens GN=NCL PE=1 SV=3			0	99	EVFEDAAEIR			0.000120974	1177.56	589.788	1177.56	589.788	2	9	1.1.1.2407.4	1	43.6001	157318	44.0147
17	22.16	22.16	24.93	16.06	16.06	sp|P19338|NUCL_HUMAN	Nucleolin OS=Homo sapiens GN=NCL PE=1 SV=3			0	99	EVFEDAAEIR			0.000120974	1177.56	589.788	1177.56	589.788	2	9	1.1.1.2455.4	1	45.6183	6140.98	45.1933
17	22.16	22.16	24.93	16.06	16.06	sp|P19338|NUCL_HUMAN	Nucleolin OS=Homo sapiens GN=NCL PE=1 SV=3			0	98.8	EVFEDAAEIR			-0.000367309	1177.56	589.788	1177.56	589.788	2	8	1.1.1.2502.3	1	47.5932	898.329	47.672
17	22.16	22.16	24.93	16.06	16.06	sp|P19338|NUCL_HUMAN	Nucleolin OS=Homo sapiens GN=NCL PE=1 SV=3			0	98.22	EVFEDAAEIR			0.000243044	1177.56	589.788	1177.56	589.788	2	10	1.1.1.2431.5	1	44.6118	166604	44.1832
17	22.16	22.16	24.93	16.06	16.06	sp|P19338|NUCL_HUMAN	Nucleolin OS=Homo sapiens GN=NCL PE=1 SV=3			0	98.22	EVFEDAAEIR			0.000120974	1177.56	589.788	1177.56	589.788	2	9	1.1.1.2447.3	1	45.2821	11105.9	44.8576
17	22.16	22.16	24.93	16.06	16.06	sp|P19338|NUCL_HUMAN	Nucleolin OS=Homo sapiens GN=NCL PE=1 SV=3			0	95.38	EVFEDAAEIR			-0.00400295	1177.56	589.786	1177.56	589.788	2	6	1.1.1.2575.5	1	50.6644	571.019	50.6995
17	22.16	22.16	24.93	16.06	16.06	sp|P19338|NUCL_HUMAN	Nucleolin OS=Homo sapiens GN=NCL PE=1 SV=3			0	90.58	EVFEDAAEIR			-0.000977662	1177.56	589.788	1177.56	589.788	2	7	1.1.1.2463.4	1	45.9543	2603.47	45.9902
17	22.16	22.16	24.93	16.06	16.06	sp|P19338|NUCL_HUMAN	Nucleolin OS=Homo sapiens GN=NCL PE=1 SV=3			0	82.76	EVFEDAAEIR			-0.00122944	1177.56	589.787	1177.56	589.788	2	5	1.1.1.3503.2	1	89.6255	98.6951	89.7048
17	22.16	22.16	24.93	16.06	16.06	sp|P19338|NUCL_HUMAN	Nucleolin OS=Homo sapiens GN=NCL PE=1 SV=3			0	79.06	EVFEDAAEIR			-0.00147358	1177.56	589.787	1177.56	589.788	2	5	1.1.1.3316.4	1	81.9372	266.615	82.1012
17	22.16	22.16	24.93	16.06	16.06	sp|P19338|NUCL_HUMAN	Nucleolin OS=Homo sapiens GN=NCL PE=1 SV=3			0	35.55	EVFEDAAEIR			-0.000863225	1177.56	589.788	1177.56	589.788	2	4	1.1.1.3327.4	1	82.4063	217.779	82.4423
17	22.16	22.16	24.93	16.06	16.06	sp|P19338|NUCL_HUMAN	Nucleolin OS=Homo sapiens GN=NCL PE=1 SV=3			0	99	FGYVDFESAEDLEK			0.00113596	1647.73	824.873	1647.73	824.872	2	12	1.1.1.2976.7	1	67.5586	59689.7	67.9736
17	22.16	22.16	24.93	16.06	16.06	sp|P19338|NUCL_HUMAN	Nucleolin OS=Homo sapiens GN=NCL PE=1 SV=3			0	99	FGYVDFESAEDLEK			0.000769747	1647.73	824.873	1647.73	824.872	2	16	1.1.1.2984.10	1	67.9001	61703	67.9736
17	22.16	22.16	24.93	16.06	16.06	sp|P19338|NUCL_HUMAN	Nucleolin OS=Homo sapiens GN=NCL PE=1 SV=3			0	99	FGYVDFESAEDLEK			-0.00101933	1647.73	824.872	1647.73	824.872	2	15	1.1.1.3000.12	1	68.5776	41018.4	68.1429
17	22.16	22.16	24.93	16.06	16.06	sp|P19338|NUCL_HUMAN	Nucleolin OS=Homo sapiens GN=NCL PE=1 SV=3			0	99	FGYVDFESAEDLEK			-0.000897257	1647.73	824.872	1647.73	824.872	2	16	1.1.1.3008.10	1	68.9119	14243.3	68.4812
17	22.16	22.16	24.93	16.06	16.06	sp|P19338|NUCL_HUMAN	Nucleolin OS=Homo sapiens GN=NCL PE=1 SV=3			0	99	FGYVDFESAEDLEK			0.000201375	1647.73	824.873	1647.73	824.872	2	15	1.1.1.3016.14	1	69.2555	4946.74	69.2832
17	22.16	22.16	24.93	16.06	16.06	sp|P19338|NUCL_HUMAN	Nucleolin OS=Homo sapiens GN=NCL PE=1 SV=3			0	99	FGYVDFESAEDLEK			0.000201375	1647.73	824.873	1647.73	824.872	2	14	1.1.1.3024.7	1	69.5902	5068.97	69.1553
17	22.16	22.16	24.93	16.06	16.06	sp|P19338|NUCL_HUMAN	Nucleolin OS=Homo sapiens GN=NCL PE=1 SV=3			0	99	FGYVDFESAEDLEK			0.00654903	1647.74	824.876	1647.73	824.872	2	13	1.1.1.3040.8	1	70.2697	2134.41	70.3023
17	22.16	22.16	24.93	16.06	16.06	sp|P19338|NUCL_HUMAN	Nucleolin OS=Homo sapiens GN=NCL PE=1 SV=3			0	99	FGYVDFESAEDLEK			0.000567586	1647.73	824.873	1647.73	824.872	2	13	1.1.1.3032.11	1	69.9343	4194.15	69.4958
17	22.16	22.16	24.93	16.06	16.06	sp|P19338|NUCL_HUMAN	Nucleolin OS=Homo sapiens GN=NCL PE=1 SV=3			0	99	FGYVDFESAEDLEK			0.00410762	1647.73	824.875	1647.73	824.872	2	11	1.1.1.3048.11	1	70.6068	2072.96	70.5533
17	22.16	22.16	24.93	16.06	16.06	sp|P19338|NUCL_HUMAN	Nucleolin OS=Homo sapiens GN=NCL PE=1 SV=3			0	99	FGYVDFESAEDLEK			-0.000408976	1647.73	824.872	1647.73	824.872	2	12	1.1.1.3034.13	1	70.0212	3750.75	69.581
17	22.16	22.16	24.93	16.06	16.06	sp|P19338|NUCL_HUMAN	Nucleolin OS=Homo sapiens GN=NCL PE=1 SV=3			0	99	FGYVDFESAEDLEK			0.000933797	1647.73	824.873	1647.73	824.872	2	9	1.1.1.3065.10	1	71.3168	1779.22	71.5575
17	22.16	22.16	24.93	16.06	16.06	sp|P19338|NUCL_HUMAN	Nucleolin OS=Homo sapiens GN=NCL PE=1 SV=3			0	99	FGYVDFESAEDLEK			0.00398555	1647.73	824.875	1647.73	824.872	2	10	1.1.1.3056.8	1	70.9388	1984.01	71.0132
17	22.16	22.16	24.93	16.06	16.06	sp|P19338|NUCL_HUMAN	Nucleolin OS=Homo sapiens GN=NCL PE=1 SV=3			0	99	FGYVDFESAEDLEK			0.00740352	1647.74	824.876	1647.73	824.872	2	9	1.1.1.3081.11	1	71.9927	1018.67	71.9803
17	22.16	22.16	24.93	16.06	16.06	sp|P19338|NUCL_HUMAN	Nucleolin OS=Homo sapiens GN=NCL PE=1 SV=3			0	98.77	FGYVDFESAEDLEK			0.000567586	1647.73	824.873	1647.73	824.872	2	9	1.1.1.3091.5	1	72.4122	1131.64	72.4473
17	22.16	22.16	24.93	16.06	16.06	sp|P19338|NUCL_HUMAN	Nucleolin OS=Homo sapiens GN=NCL PE=1 SV=3			0	98.57	FGYVDFESAEDLEK			0.00752559	1647.74	824.876	1647.73	824.872	2	9	1.1.1.3111.9	1	73.265	788.62	73.2118
17	22.16	22.16	24.93	16.06	16.06	sp|P19338|NUCL_HUMAN	Nucleolin OS=Homo sapiens GN=NCL PE=1 SV=3			0	97.55	FGYVDFESAEDLEK			0.000933797	1647.73	824.873	1647.73	824.872	2	8	1.1.1.3072.8	1	71.6094	1779.22	71.5575
17	22.16	22.16	24.93	16.06	16.06	sp|P19338|NUCL_HUMAN	Nucleolin OS=Homo sapiens GN=NCL PE=1 SV=3			0	93.85	FGYVDFESAEDLEK			0.00154415	1647.73	824.873	1647.73	824.872	2	7	1.1.1.3099.7	1	72.7534	1167.43	72.6593
17	22.16	22.16	24.93	16.06	16.06	sp|P19338|NUCL_HUMAN	Nucleolin OS=Homo sapiens GN=NCL PE=1 SV=3			0	17.38	FGYVDFESAEDLEK			0.00455392	1647.74	824.875	1647.73	824.872	2	5	1.1.1.2924.14	1	65.3676	1107.16	65.4377
17	22.16	22.16	24.93	16.06	16.06	sp|P19338|NUCL_HUMAN	Nucleolin OS=Homo sapiens GN=NCL PE=1 SV=3			0	99	GFGFVDFNSEEDAK	Deamidated(N)@8		0.0017114	1561.66	781.837	1561.66	781.836	2	16	1.1.1.2965.4	1	67.0907	14115.6	66.9989
17	22.16	22.16	24.93	16.06	16.06	sp|P19338|NUCL_HUMAN	Nucleolin OS=Homo sapiens GN=NCL PE=1 SV=3			0	99	GFGFVDFNSEEDAK	Deamidated(N)@8		0.0017114	1561.66	781.837	1561.66	781.836	2	14	1.1.1.2963.10	1	67.0105	14115.6	66.9989
17	22.16	22.16	24.93	16.06	16.06	sp|P19338|NUCL_HUMAN	Nucleolin OS=Homo sapiens GN=NCL PE=1 SV=3			0	99	GFGFVDFNSEEDAK			0.000131748	1560.67	781.344	1560.67	781.344	2	13	1.1.1.2919.12	1	65.1536	19815.2	64.7171
17	22.16	22.16	24.93	16.06	16.06	sp|P19338|NUCL_HUMAN	Nucleolin OS=Homo sapiens GN=NCL PE=1 SV=3			0	99	GFGFVDFNSEEDAK	Deamidated(N)@8		-0.00060793	1561.66	781.836	1561.66	781.836	2	11	1.1.1.2953.8	1	66.5832	12739.6	66.9989
17	22.16	22.16	24.93	16.06	16.06	sp|P19338|NUCL_HUMAN	Nucleolin OS=Homo sapiens GN=NCL PE=1 SV=3			0	99	GFGFVDFNSEEDAK			-0.00218759	1560.67	781.343	1560.67	781.344	2	12	1.1.1.2927.8	1	65.4901	4234.71	65.4377
17	22.16	22.16	24.93	16.06	16.06	sp|P19338|NUCL_HUMAN	Nucleolin OS=Homo sapiens GN=NCL PE=1 SV=3			0	98.33	GFGFVDFNSEEDAK	Deamidated(N)@8		0.0017114	1561.66	781.837	1561.66	781.836	2	12	1.1.1.2957.10	1	66.755	14115.6	66.9989
17	22.16	22.16	24.93	16.06	16.06	sp|P19338|NUCL_HUMAN	Nucleolin OS=Homo sapiens GN=NCL PE=1 SV=3			0	85.05	GFGFVDFNSEEDAK			0.00135245	1560.67	781.345	1560.67	781.344	2	9	1.1.1.2940.6	1	66.0354	2356.36	66.2788
17	22.16	22.16	24.93	16.06	16.06	sp|P19338|NUCL_HUMAN	Nucleolin OS=Homo sapiens GN=NCL PE=1 SV=3			0	99	GLSEDTTEETLK			-0.000110472	1321.62	661.82	1321.62	661.82	2	12	1.1.1.2134.10	1	32.1458	84010.4	31.716
17	22.16	22.16	24.93	16.06	16.06	sp|P19338|NUCL_HUMAN	Nucleolin OS=Homo sapiens GN=NCL PE=1 SV=3			0	99	GLSEDTTEETLK			-0.000110472	1321.62	661.82	1321.62	661.82	2	12	1.1.1.2118.16	1	31.4799	82151.3	31.716
17	22.16	22.16	24.93	16.06	16.06	sp|P19338|NUCL_HUMAN	Nucleolin OS=Homo sapiens GN=NCL PE=1 SV=3			0	89.24	GLSEDTTEETLK			-0.000354612	1321.62	661.82	1321.62	661.82	2	8	1.1.1.2150.16	1	32.8195	2856.39	32.3849
17	22.16	22.16	24.93	16.06	16.06	sp|P19338|NUCL_HUMAN	Nucleolin OS=Homo sapiens GN=NCL PE=1 SV=3			0	45.37	GLSEDTTEETLK			-0.000476683	1321.62	661.819	1321.62	661.82	2	7	1.1.1.2142.9	1	32.4782	7606.05	32.0518
17	22.16	22.16	24.93	16.06	16.06	sp|P19338|NUCL_HUMAN	Nucleolin OS=Homo sapiens GN=NCL PE=1 SV=3			0	99	GLSEDTTEETLKESFDGSVR		missed K-E@12	0.000541166	2199.02	734.013	2199.02	734.013	3	14	1.1.1.2796.5	1	59.9599	4126.77	59.8698
17	22.16	22.16	24.93	16.06	16.06	sp|P19338|NUCL_HUMAN	Nucleolin OS=Homo sapiens GN=NCL PE=1 SV=3			0	99	GLSEDTTEETLKESFDGSVR		missed K-E@12	0.00109048	2199.02	734.014	2199.02	734.013	3	12	1.1.1.2838.9	1	61.7276	2633.9	61.7172
17	22.16	22.16	24.93	16.06	16.06	sp|P19338|NUCL_HUMAN	Nucleolin OS=Homo sapiens GN=NCL PE=1 SV=3			0	99	GLSEDTTEETLKESFDGSVR		missed K-E@12	0.00402017	2199.02	734.015	2199.02	734.013	3	15	1.1.1.2848.4	1	62.1441	2600.7	62.2222
17	22.16	22.16	24.93	16.06	16.06	sp|P19338|NUCL_HUMAN	Nucleolin OS=Homo sapiens GN=NCL PE=1 SV=3			0	99	GLSEDTTEETLKESFDGSVR		missed K-E@12	0.00237614	2199.02	734.014	2199.02	734.013	3	13	1.1.1.2764.8	1	58.6206	59357.4	58.1901
17	22.16	22.16	24.93	16.06	16.06	sp|P19338|NUCL_HUMAN	Nucleolin OS=Homo sapiens GN=NCL PE=1 SV=3			0	99	GLSEDTTEETLKESFDGSVR		missed K-E@12	-0.000287537	2199.02	1100.52	2199.02	1100.52	2	13	1.1.1.2765.35	1	58.6854	19795.6	58.2321
17	22.16	22.16	24.93	16.06	16.06	sp|P19338|NUCL_HUMAN	Nucleolin OS=Homo sapiens GN=NCL PE=1 SV=3			0	99	GLSEDTTEETLKESFDGSVR		missed K-E@12	-0.00275473	2199.02	734.012	2199.02	734.013	3	12	1.1.1.2788.7	1	59.6281	3247.58	59.578
17	22.16	22.16	24.93	16.06	16.06	sp|P19338|NUCL_HUMAN	Nucleolin OS=Homo sapiens GN=NCL PE=1 SV=3			0	99	GLSEDTTEETLKESFDGSVR		missed K-E@12	-0.00312094	2199.01	734.012	2199.02	734.013	3	10	1.1.1.2890.7	1	63.9212	1899.91	63.9546
17	22.16	22.16	24.93	16.06	16.06	sp|P19338|NUCL_HUMAN	Nucleolin OS=Homo sapiens GN=NCL PE=1 SV=3			0	99	GLSEDTTEETLKESFDGSVR		missed K-E@12	0.000541166	2199.02	734.013	2199.02	734.013	3	12	1.1.1.2804.4	1	60.2923	4519.34	60.3701
17	22.16	22.16	24.93	16.06	16.06	sp|P19338|NUCL_HUMAN	Nucleolin OS=Homo sapiens GN=NCL PE=1 SV=3			0	99	GLSEDTTEETLKESFDGSVR		missed K-E@12	0.00402017	2199.02	734.015	2199.02	734.013	3	12	1.1.1.2822.7	1	61.05	3920.94	60.8303
17	22.16	22.16	24.93	16.06	16.06	sp|P19338|NUCL_HUMAN	Nucleolin OS=Homo sapiens GN=NCL PE=1 SV=3			0	99	GLSEDTTEETLKESFDGSVR		missed K-E@12	-0.000370449	2199.02	734.013	2199.02	734.013	3	11	1.1.1.2780.5	1	59.2919	6447.04	58.8644
17	22.16	22.16	24.93	16.06	16.06	sp|P19338|NUCL_HUMAN	Nucleolin OS=Homo sapiens GN=NCL PE=1 SV=3			0	99	GLSEDTTEETLKESFDGSVR		missed K-E@12	0.00109048	2199.02	734.014	2199.02	734.013	3	8	1.1.1.2874.5	1	63.2419	1479.01	63.277
17	22.16	22.16	24.93	16.06	16.06	sp|P19338|NUCL_HUMAN	Nucleolin OS=Homo sapiens GN=NCL PE=1 SV=3			0	98.79	GLSEDTTEETLKESFDGSVR		missed K-E@12	-0.00312094	2199.01	734.012	2199.02	734.013	3	9	1.1.1.2898.7	1	64.2603	2011.82	64.4209
17	22.16	22.16	24.93	16.06	16.06	sp|P19338|NUCL_HUMAN	Nucleolin OS=Homo sapiens GN=NCL PE=1 SV=3			0	98.66	GLSEDTTEETLKESFDGSVR		missed K-E@12	-0.00257163	2199.02	734.012	2199.02	734.013	3	10	1.1.1.2830.8	1	61.389	3267.98	61.1681
17	22.16	22.16	24.93	16.06	16.06	sp|P19338|NUCL_HUMAN	Nucleolin OS=Homo sapiens GN=NCL PE=1 SV=3			0	98.22	GLSEDTTEETLKESFDGSVR		missed K-E@12	0.00347477	2199.02	734.014	2199.02	734.013	3	11	1.1.1.2772.5	1	58.9557	23216.3	58.5267
17	22.16	22.16	24.93	16.06	16.06	sp|P19338|NUCL_HUMAN	Nucleolin OS=Homo sapiens GN=NCL PE=1 SV=3			0	96.97	GLSEDTTEETLKESFDGSVR		missed K-E@12	0.00475259	2199.02	734.015	2199.02	734.013	3	8	1.1.1.2882.5	1	63.5808	1464.24	63.531
17	22.16	22.16	24.93	16.06	16.06	sp|P19338|NUCL_HUMAN	Nucleolin OS=Homo sapiens GN=NCL PE=1 SV=3			0	96.23	GLSEDTTEETLKESFDGSVR		missed K-E@12	0.000541166	2199.02	734.013	2199.02	734.013	3	9	1.1.1.2907.7	1	64.6415	1672.83	64.6749
17	22.16	22.16	24.93	16.06	16.06	sp|P19338|NUCL_HUMAN	Nucleolin OS=Homo sapiens GN=NCL PE=1 SV=3			0	94.97	GLSEDTTEETLKESFDGSVR		missed K-E@12	-0.000191255	2199.02	734.013	2199.02	734.013	3	11	1.1.1.2813.4	1	60.6685	4219.3	60.6208
17	22.16	22.16	24.93	16.06	16.06	sp|P19338|NUCL_HUMAN	Nucleolin OS=Homo sapiens GN=NCL PE=1 SV=3			0	84.41	GLSEDTTEETLKESFDGSVR		missed K-E@12	0.00530191	2199.02	734.015	2199.02	734.013	3	7	1.1.1.2864.8	1	62.8235	1797.88	62.5182
17	22.16	22.16	24.93	16.06	16.06	sp|P19338|NUCL_HUMAN	Nucleolin OS=Homo sapiens GN=NCL PE=1 SV=3			0	79.35	GLSEDTTEETLKESFDGSVR		missed K-E@12	-0.00220541	2199.02	734.013	2199.02	734.013	3	9	1.1.1.2920.7	1	65.1919	1477.94	65.1404
17	22.16	22.16	24.93	16.06	16.06	sp|P19338|NUCL_HUMAN	Nucleolin OS=Homo sapiens GN=NCL PE=1 SV=3			0	67.86	GLSEDTTEETLKESFDGSVR		missed K-E@12	0.00585122	2199.02	734.015	2199.02	734.013	3	7	1.1.1.2954.7	1	66.6248	892.18	66.5735
17	22.16	22.16	24.93	16.06	16.06	sp|P19338|NUCL_HUMAN	Nucleolin OS=Homo sapiens GN=NCL PE=1 SV=3			0	63.67	GLSEDTTEETLKESFDGSVR		missed K-E@12	-0.00113667	2199.02	1100.52	2199.02	1100.52	2	8	1.1.1.2849.36	1	62.2129	828.732	62.18
17	22.16	22.16	24.93	16.06	16.06	sp|P19338|NUCL_HUMAN	Nucleolin OS=Homo sapiens GN=NCL PE=1 SV=3			0	60.44	GLSEDTTEETLKESFDGSVR		missed K-E@12	0.00154888	2199.02	1100.52	2199.02	1100.52	2	8	1.1.1.2942.31	1	66.1399	622.487	66.0697
17	22.16	22.16	24.93	16.06	16.06	sp|P19338|NUCL_HUMAN	Nucleolin OS=Homo sapiens GN=NCL PE=1 SV=3			0	26.95	GLSEDTTEETLKESFDGSVR		missed K-E@12	0.00402017	2199.02	734.015	2199.02	734.013	3	7	1.1.1.2852.6	1	62.3147	2600.7	62.2222
17	22.16	22.16	24.93	16.06	16.06	sp|P19338|NUCL_HUMAN	Nucleolin OS=Homo sapiens GN=NCL PE=1 SV=3			0	17.75	GLSEDTTEETLKESFDGSVR		missed K-E@12	0.00438638	2199.02	734.015	2199.02	734.013	3	8	1.1.1.2826.6	1	61.2183	3986.68	60.7883
17	22.16	22.16	24.93	16.06	16.06	sp|P19338|NUCL_HUMAN	Nucleolin OS=Homo sapiens GN=NCL PE=1 SV=3			0	99	KFGYVDFESAEDLEK		missed K-F@1	0.00307768	1775.83	592.95	1775.83	592.949	3	13	1.1.1.2762.3	1	58.5321	27422	58.6532
17	22.16	22.16	24.93	16.06	16.06	sp|P19338|NUCL_HUMAN	Nucleolin OS=Homo sapiens GN=NCL PE=1 SV=3			0	60.88	KFGYVDFESAEDLEK		missed K-F@1	-0.00161283	1775.82	888.919	1775.83	888.92	2	8	1.1.1.2773.25	1	59.0146	19442.9	58.6955
17	22.16	22.16	24.93	16.06	16.06	sp|P19338|NUCL_HUMAN	Nucleolin OS=Homo sapiens GN=NCL PE=1 SV=3			0	99	NDLAVVDVR	Deamidated(N)@1		-0.000916084	1000.52	501.266	1000.52	501.267	2	7	1.1.1.2469.2	1	46.2051	565.066	46.2427
17	22.16	22.16	24.93	16.06	16.06	sp|P19338|NUCL_HUMAN	Nucleolin OS=Homo sapiens GN=NCL PE=1 SV=3			0	99	NDLAVVDVR	Deamidated(N)@1		6.04807e-05	1000.52	501.267	1000.52	501.267	2	10	1.1.1.2488.2	1	47.003	16438.4	47.4202
17	22.16	22.16	24.93	16.06	16.06	sp|P19338|NUCL_HUMAN	Nucleolin OS=Homo sapiens GN=NCL PE=1 SV=3			0	99	NDLAVVDVR	Deamidated(N)@1		-0.000366766	1000.52	501.267	1000.52	501.267	2	12	1.1.1.2504.2	1	47.6763	19278.4	47.4623
17	22.16	22.16	24.93	16.06	16.06	sp|P19338|NUCL_HUMAN	Nucleolin OS=Homo sapiens GN=NCL PE=1 SV=3			0	99	NDLAVVDVR	Deamidated(N)@1		-0.000366766	1000.52	501.267	1000.52	501.267	2	11	1.1.1.2496.2	1	47.3404	19278.4	47.4623
17	22.16	22.16	24.93	16.06	16.06	sp|P19338|NUCL_HUMAN	Nucleolin OS=Homo sapiens GN=NCL PE=1 SV=3			0	99	TEADAEKTFEEK		missed K-T@7	-0.00299367	1396.63	699.324	1396.64	699.325	2	20	1.1.1.1932.24	1	23.7196	222616	23.2801
17	22.16	22.16	24.93	16.06	16.06	sp|P19338|NUCL_HUMAN	Nucleolin OS=Homo sapiens GN=NCL PE=1 SV=3			0	99	TEADAEKTFEEK		missed K-T@7	-0.00238331	1396.63	699.324	1396.64	699.325	2	17	1.1.1.1940.25	1	24.0564	45112.4	23.6129
17	22.16	22.16	24.93	16.06	16.06	sp|P19338|NUCL_HUMAN	Nucleolin OS=Homo sapiens GN=NCL PE=1 SV=3			0	99	TEADAEKTFEEK		missed K-T@7	-0.0130034	1396.62	699.319	1396.64	699.325	2	11	1.1.1.1984.19	1	25.9013	3265.07	25.4565
17	22.16	22.16	24.93	16.06	16.06	sp|P19338|NUCL_HUMAN	Nucleolin OS=Homo sapiens GN=NCL PE=1 SV=3			0	93.68	TEADAEKTFEEK		missed K-T@7	-0.0105634	1396.63	699.32	1396.64	699.325	2	10	1.1.1.1916.21	1	23.0508	242079	23.1143
17	22.16	22.16	24.93	16.06	16.06	sp|P19338|NUCL_HUMAN	Nucleolin OS=Homo sapiens GN=NCL PE=1 SV=3			0	59.46	TEADAEKTFEEK		missed K-T@7	-0.0109282	1396.62	699.32	1396.64	699.325	2	9	1.1.1.1965.16	1	25.0972	4811.85	25.332
18	22.1	22.1	12.16	9.98	8.13	tr|E9PGM1|E9PGM1_HUMAN; tr|E7EUU4|E7EUU4_HUMAN; sp|Q04637|IF4G1_HUMAN	Eukaryotic translation initiation factor 4 gamma 1 OS=Homo sapiens GN=EIF4G1 PE=2 SV=1; Eukaryotic translation initiation factor 4 gamma 1 OS=Homo sapiens GN=EIF4G1 PE=2 SV=1; Eukaryotic translation initiation factor 4 gamma 1 OS=Homo sapiens GN=EIF4G1 PE=1 SV=4			2	99	AALSEEELEK			-0.000314461	1117.55	559.782	1117.55	559.782	2	10	1.1.1.2107.9	1	31.0147	2107.21	30.9622
18	22.1	22.1	12.16	9.98	8.13	tr|E9PGM1|E9PGM1_HUMAN; tr|E7EUU4|E7EUU4_HUMAN; sp|Q04637|IF4G1_HUMAN	Eukaryotic translation initiation factor 4 gamma 1 OS=Homo sapiens GN=EIF4G1 PE=2 SV=1; Eukaryotic translation initiation factor 4 gamma 1 OS=Homo sapiens GN=EIF4G1 PE=2 SV=1; Eukaryotic translation initiation factor 4 gamma 1 OS=Homo sapiens GN=EIF4G1 PE=1 SV=4			2	99	DITEEIMSGAR			0.00201578	1220.57	611.294	1220.57	611.293	2	8	1.1.1.2765.3	1	58.6588	3123.37	58.8644
18	22.1	22.1	12.16	9.98	8.13	tr|E9PGM1|E9PGM1_HUMAN; tr|E7EUU4|E7EUU4_HUMAN; sp|Q04637|IF4G1_HUMAN	Eukaryotic translation initiation factor 4 gamma 1 OS=Homo sapiens GN=EIF4G1 PE=2 SV=1; Eukaryotic translation initiation factor 4 gamma 1 OS=Homo sapiens GN=EIF4G1 PE=2 SV=1; Eukaryotic translation initiation factor 4 gamma 1 OS=Homo sapiens GN=EIF4G1 PE=1 SV=4			2	99	EAALPPVSPLK	Phospho(S)@8		-0.00343301	1200.61	601.313	1200.62	601.315	2	12	1.1.1.2485.3	0	46.8777	31547.2	46.9565
18	22.1	22.1	12.16	9.98	8.13	tr|E9PGM1|E9PGM1_HUMAN; tr|E7EUU4|E7EUU4_HUMAN; sp|Q04637|IF4G1_HUMAN	Eukaryotic translation initiation factor 4 gamma 1 OS=Homo sapiens GN=EIF4G1 PE=2 SV=1; Eukaryotic translation initiation factor 4 gamma 1 OS=Homo sapiens GN=EIF4G1 PE=2 SV=1; Eukaryotic translation initiation factor 4 gamma 1 OS=Homo sapiens GN=EIF4G1 PE=1 SV=4			2	99	EAVGDLLDAFK			0.000520597	1176.6	589.309	1176.6	589.309	2	12	1.1.1.3146.2	1	74.7452	7457.53	74.8679
18	22.1	22.1	12.16	9.98	8.13	tr|E9PGM1|E9PGM1_HUMAN; tr|E7EUU4|E7EUU4_HUMAN; sp|Q04637|IF4G1_HUMAN	Eukaryotic translation initiation factor 4 gamma 1 OS=Homo sapiens GN=EIF4G1 PE=2 SV=1; Eukaryotic translation initiation factor 4 gamma 1 OS=Homo sapiens GN=EIF4G1 PE=2 SV=1; Eukaryotic translation initiation factor 4 gamma 1 OS=Homo sapiens GN=EIF4G1 PE=1 SV=4			2	99	EFLPEGQDIGAFVAEQK			-0.00280382	1876.92	939.466	1876.92	939.468	2	12	1.1.1.3078.19	1	71.8721	4896.34	72.0229
18	22.1	22.1	12.16	9.98	8.13	tr|E9PGM1|E9PGM1_HUMAN; tr|E7EUU4|E7EUU4_HUMAN; sp|Q04637|IF4G1_HUMAN	Eukaryotic translation initiation factor 4 gamma 1 OS=Homo sapiens GN=EIF4G1 PE=2 SV=1; Eukaryotic translation initiation factor 4 gamma 1 OS=Homo sapiens GN=EIF4G1 PE=2 SV=1; Eukaryotic translation initiation factor 4 gamma 1 OS=Homo sapiens GN=EIF4G1 PE=1 SV=4			2	99	QVTQLAIDTEER			-1.73251e-05	1401.71	701.862	1401.71	701.862	2	9	1.1.1.2290.14	1	38.6917	1394.51	38.6774
18	22.1	22.1	12.16	9.98	8.13	tr|E9PGM1|E9PGM1_HUMAN; tr|E7EUU4|E7EUU4_HUMAN; sp|Q04637|IF4G1_HUMAN	Eukaryotic translation initiation factor 4 gamma 1 OS=Homo sapiens GN=EIF4G1 PE=2 SV=1; Eukaryotic translation initiation factor 4 gamma 1 OS=Homo sapiens GN=EIF4G1 PE=2 SV=1; Eukaryotic translation initiation factor 4 gamma 1 OS=Homo sapiens GN=EIF4G1 PE=1 SV=4			2	99	SFSKEVEER	Phospho(S)@3	missed K-E@4	-0.000403312	1189.5	595.758	1189.5	595.758	2	14	1.1.1.2081.13	1	29.9228	17985.4	30.0776
18	22.1	22.1	12.16	9.98	8.13	tr|E9PGM1|E9PGM1_HUMAN; tr|E7EUU4|E7EUU4_HUMAN; sp|Q04637|IF4G1_HUMAN	Eukaryotic translation initiation factor 4 gamma 1 OS=Homo sapiens GN=EIF4G1 PE=2 SV=1; Eukaryotic translation initiation factor 4 gamma 1 OS=Homo sapiens GN=EIF4G1 PE=2 SV=1; Eukaryotic translation initiation factor 4 gamma 1 OS=Homo sapiens GN=EIF4G1 PE=1 SV=4			2	99	VEYTLGEESEAPGQR			0.00335311	1663.77	832.893	1663.77	832.892	2	18	1.1.1.2259.30	1	37.4099	22496.8	37.2977
18	22.1	22.1	12.16	9.98	8.13	tr|E9PGM1|E9PGM1_HUMAN; tr|E7EUU4|E7EUU4_HUMAN; sp|Q04637|IF4G1_HUMAN	Eukaryotic translation initiation factor 4 gamma 1 OS=Homo sapiens GN=EIF4G1 PE=2 SV=1; Eukaryotic translation initiation factor 4 gamma 1 OS=Homo sapiens GN=EIF4G1 PE=2 SV=1; Eukaryotic translation initiation factor 4 gamma 1 OS=Homo sapiens GN=EIF4G1 PE=1 SV=4			1.92082	98.87	EMDEAATAEER			0.00048471	1250.51	626.262	1250.51	626.262	2	11	1.1.1.1846.13	1	20.109	11679.2	20.0958
18	22.1	22.1	12.16	9.98	8.13	tr|E9PGM1|E9PGM1_HUMAN; tr|E7EUU4|E7EUU4_HUMAN; sp|Q04637|IF4G1_HUMAN	Eukaryotic translation initiation factor 4 gamma 1 OS=Homo sapiens GN=EIF4G1 PE=2 SV=1; Eukaryotic translation initiation factor 4 gamma 1 OS=Homo sapiens GN=EIF4G1 PE=2 SV=1; Eukaryotic translation initiation factor 4 gamma 1 OS=Homo sapiens GN=EIF4G1 PE=1 SV=4			1.82391	98.57	QKEMDEAATAEER		missed K-E@2	-0.00230024	1506.66	754.337	1506.66	754.338	2	10	1.1.1.1823.30	1	19.1589	3965.27	19.2996
18	22.1	22.1	12.16	9.98	8.13	tr|E9PGM1|E9PGM1_HUMAN; tr|E7EUU4|E7EUU4_HUMAN; sp|Q04637|IF4G1_HUMAN	Eukaryotic translation initiation factor 4 gamma 1 OS=Homo sapiens GN=EIF4G1 PE=2 SV=1; Eukaryotic translation initiation factor 4 gamma 1 OS=Homo sapiens GN=EIF4G1 PE=2 SV=1; Eukaryotic translation initiation factor 4 gamma 1 OS=Homo sapiens GN=EIF4G1 PE=1 SV=4			1.46852	96.9	EFEKDKDDDEVFEK		missed K-D@4; missed K-D@6	0.00350723	1771.78	591.601	1771.78	591.6	3	11	1.1.1.2032.11	1	27.8819	6708.48	27.8285
18	22.1	22.1	12.16	9.98	8.13	tr|E9PGM1|E9PGM1_HUMAN; tr|E7EUU4|E7EUU4_HUMAN; sp|Q04637|IF4G1_HUMAN	Eukaryotic translation initiation factor 4 gamma 1 OS=Homo sapiens GN=EIF4G1 PE=2 SV=1; Eukaryotic translation initiation factor 4 gamma 1 OS=Homo sapiens GN=EIF4G1 PE=2 SV=1; Eukaryotic translation initiation factor 4 gamma 1 OS=Homo sapiens GN=EIF4G1 PE=1 SV=4			0.59346	76.03	FSALQQAVPTESTDNR			0.000424883	1762.85	882.432	1762.85	882.432	2	8	1.1.1.2388.31	1	42.824	1679	42.7107
18	22.1	22.1	12.16	9.98	8.13	tr|E9PGM1|E9PGM1_HUMAN; tr|E7EUU4|E7EUU4_HUMAN; sp|Q04637|IF4G1_HUMAN	Eukaryotic translation initiation factor 4 gamma 1 OS=Homo sapiens GN=EIF4G1 PE=2 SV=1; Eukaryotic translation initiation factor 4 gamma 1 OS=Homo sapiens GN=EIF4G1 PE=2 SV=1; Eukaryotic translation initiation factor 4 gamma 1 OS=Homo sapiens GN=EIF4G1 PE=1 SV=4			0.293282	51.16	NHDEESLECLCR	Carbamidomethyl(C)@9; Carbamidomethyl(C)@11		0.0073235	1560.64	781.326	1560.63	781.322	2	9	1.1.1.2173.19	0	33.7874	2244.02	33.8109
18	22.1	22.1	12.16	9.98	8.13	tr|E9PGM1|E9PGM1_HUMAN; tr|E7EUU4|E7EUU4_HUMAN; sp|Q04637|IF4G1_HUMAN	Eukaryotic translation initiation factor 4 gamma 1 OS=Homo sapiens GN=EIF4G1 PE=2 SV=1; Eukaryotic translation initiation factor 4 gamma 1 OS=Homo sapiens GN=EIF4G1 PE=2 SV=1; Eukaryotic translation initiation factor 4 gamma 1 OS=Homo sapiens GN=EIF4G1 PE=1 SV=4			0	99	DITEEIMSGAR			0.00201578	1220.57	611.294	1220.57	611.293	2	8	1.1.1.2773.4	1	58.9971	3123.37	58.8644
18	22.1	22.1	12.16	9.98	8.13	tr|E9PGM1|E9PGM1_HUMAN; tr|E7EUU4|E7EUU4_HUMAN; sp|Q04637|IF4G1_HUMAN	Eukaryotic translation initiation factor 4 gamma 1 OS=Homo sapiens GN=EIF4G1 PE=2 SV=1; Eukaryotic translation initiation factor 4 gamma 1 OS=Homo sapiens GN=EIF4G1 PE=2 SV=1; Eukaryotic translation initiation factor 4 gamma 1 OS=Homo sapiens GN=EIF4G1 PE=1 SV=4			0	99	EAALPPVSPLK	Phospho(S)@8		-0.000747455	1200.61	601.315	1200.62	601.315	2	12	1.1.1.2517.4	1	48.2245	10701.5	48.0076
18	22.1	22.1	12.16	9.98	8.13	tr|E9PGM1|E9PGM1_HUMAN; tr|E7EUU4|E7EUU4_HUMAN; sp|Q04637|IF4G1_HUMAN	Eukaryotic translation initiation factor 4 gamma 1 OS=Homo sapiens GN=EIF4G1 PE=2 SV=1; Eukaryotic translation initiation factor 4 gamma 1 OS=Homo sapiens GN=EIF4G1 PE=2 SV=1; Eukaryotic translation initiation factor 4 gamma 1 OS=Homo sapiens GN=EIF4G1 PE=1 SV=4			0	99	EAALPPVSPLK	Phospho(S)@8		-0.00123574	1200.61	601.314	1200.62	601.315	2	11	1.1.1.2525.5	1	48.5623	7976.1	48.3866
18	22.1	22.1	12.16	9.98	8.13	tr|E9PGM1|E9PGM1_HUMAN; tr|E7EUU4|E7EUU4_HUMAN; sp|Q04637|IF4G1_HUMAN	Eukaryotic translation initiation factor 4 gamma 1 OS=Homo sapiens GN=EIF4G1 PE=2 SV=1; Eukaryotic translation initiation factor 4 gamma 1 OS=Homo sapiens GN=EIF4G1 PE=2 SV=1; Eukaryotic translation initiation factor 4 gamma 1 OS=Homo sapiens GN=EIF4G1 PE=1 SV=4			0	99	EAALPPVSPLK	Phospho(S)@8		0.00267052	1200.62	601.316	1200.62	601.315	2	9	1.1.1.2558.5	1	49.9472	3070.83	49.7312
18	22.1	22.1	12.16	9.98	8.13	tr|E9PGM1|E9PGM1_HUMAN; tr|E7EUU4|E7EUU4_HUMAN; sp|Q04637|IF4G1_HUMAN	Eukaryotic translation initiation factor 4 gamma 1 OS=Homo sapiens GN=EIF4G1 PE=2 SV=1; Eukaryotic translation initiation factor 4 gamma 1 OS=Homo sapiens GN=EIF4G1 PE=2 SV=1; Eukaryotic translation initiation factor 4 gamma 1 OS=Homo sapiens GN=EIF4G1 PE=1 SV=4			0	99	EAALPPVSPLK	Phospho(S)@8		-0.00392129	1200.61	601.313	1200.62	601.315	2	11	1.1.1.2477.5	0	46.5436	29825.2	46.8725
18	22.1	22.1	12.16	9.98	8.13	tr|E9PGM1|E9PGM1_HUMAN; tr|E7EUU4|E7EUU4_HUMAN; sp|Q04637|IF4G1_HUMAN	Eukaryotic translation initiation factor 4 gamma 1 OS=Homo sapiens GN=EIF4G1 PE=2 SV=1; Eukaryotic translation initiation factor 4 gamma 1 OS=Homo sapiens GN=EIF4G1 PE=2 SV=1; Eukaryotic translation initiation factor 4 gamma 1 OS=Homo sapiens GN=EIF4G1 PE=1 SV=4			0	99	EAALPPVSPLK	Phospho(S)@8		-0.000869525	1200.61	601.315	1200.62	601.315	2	11	1.1.1.2509.2	1	47.886	14800.5	47.4623
18	22.1	22.1	12.16	9.98	8.13	tr|E9PGM1|E9PGM1_HUMAN; tr|E7EUU4|E7EUU4_HUMAN; sp|Q04637|IF4G1_HUMAN	Eukaryotic translation initiation factor 4 gamma 1 OS=Homo sapiens GN=EIF4G1 PE=2 SV=1; Eukaryotic translation initiation factor 4 gamma 1 OS=Homo sapiens GN=EIF4G1 PE=2 SV=1; Eukaryotic translation initiation factor 4 gamma 1 OS=Homo sapiens GN=EIF4G1 PE=1 SV=4			0	99	EAALPPVSPLK	Phospho(S)@8		-0.00123574	1200.61	601.314	1200.62	601.315	2	11	1.1.1.2501.4	1	47.5522	25658.5	47.125
18	22.1	22.1	12.16	9.98	8.13	tr|E9PGM1|E9PGM1_HUMAN; tr|E7EUU4|E7EUU4_HUMAN; sp|Q04637|IF4G1_HUMAN	Eukaryotic translation initiation factor 4 gamma 1 OS=Homo sapiens GN=EIF4G1 PE=2 SV=1; Eukaryotic translation initiation factor 4 gamma 1 OS=Homo sapiens GN=EIF4G1 PE=2 SV=1; Eukaryotic translation initiation factor 4 gamma 1 OS=Homo sapiens GN=EIF4G1 PE=1 SV=4			0	99	EAALPPVSPLK	Phospho(S)@8		-0.00343301	1200.61	601.313	1200.62	601.315	2	11	1.1.1.2493.4	1	47.2157	31547.2	46.9565
18	22.1	22.1	12.16	9.98	8.13	tr|E9PGM1|E9PGM1_HUMAN; tr|E7EUU4|E7EUU4_HUMAN; sp|Q04637|IF4G1_HUMAN	Eukaryotic translation initiation factor 4 gamma 1 OS=Homo sapiens GN=EIF4G1 PE=2 SV=1; Eukaryotic translation initiation factor 4 gamma 1 OS=Homo sapiens GN=EIF4G1 PE=2 SV=1; Eukaryotic translation initiation factor 4 gamma 1 OS=Homo sapiens GN=EIF4G1 PE=1 SV=4			0	99	EAALPPVSPLK	Phospho(S)@8		-0.000137102	1200.62	601.315	1200.62	601.315	2	9	1.1.1.2566.5	1	50.2844	1936.79	50.1927
18	22.1	22.1	12.16	9.98	8.13	tr|E9PGM1|E9PGM1_HUMAN; tr|E7EUU4|E7EUU4_HUMAN; sp|Q04637|IF4G1_HUMAN	Eukaryotic translation initiation factor 4 gamma 1 OS=Homo sapiens GN=EIF4G1 PE=2 SV=1; Eukaryotic translation initiation factor 4 gamma 1 OS=Homo sapiens GN=EIF4G1 PE=2 SV=1; Eukaryotic translation initiation factor 4 gamma 1 OS=Homo sapiens GN=EIF4G1 PE=1 SV=4			0	96.83	EAALPPVSPLK	Phospho(S)@8		0.00170196	1200.62	601.316	1200.62	601.315	2	7	1.1.1.2584.4	1	51.0442	1111.48	50.9955
18	22.1	22.1	12.16	9.98	8.13	tr|E9PGM1|E9PGM1_HUMAN; tr|E7EUU4|E7EUU4_HUMAN; sp|Q04637|IF4G1_HUMAN	Eukaryotic translation initiation factor 4 gamma 1 OS=Homo sapiens GN=EIF4G1 PE=2 SV=1; Eukaryotic translation initiation factor 4 gamma 1 OS=Homo sapiens GN=EIF4G1 PE=2 SV=1; Eukaryotic translation initiation factor 4 gamma 1 OS=Homo sapiens GN=EIF4G1 PE=1 SV=4			0	76.19	EAALPPVSPLK	Phospho(S)@8		-0.00392129	1200.61	601.313	1200.62	601.315	2	9	1.1.1.2543.6	1	49.3203	3607.87	49.3545
18	22.1	22.1	12.16	9.98	8.13	tr|E9PGM1|E9PGM1_HUMAN; tr|E7EUU4|E7EUU4_HUMAN; sp|Q04637|IF4G1_HUMAN	Eukaryotic translation initiation factor 4 gamma 1 OS=Homo sapiens GN=EIF4G1 PE=2 SV=1; Eukaryotic translation initiation factor 4 gamma 1 OS=Homo sapiens GN=EIF4G1 PE=2 SV=1; Eukaryotic translation initiation factor 4 gamma 1 OS=Homo sapiens GN=EIF4G1 PE=1 SV=4			0	98.58	EMDEAATAEER			-0.00146842	1250.51	626.261	1250.51	626.262	2	8	1.1.1.1863.21	1	20.8299	4156.29	20.3879
[truncated: 17,136 more rows]

## Sheet: 1P-ZrO2
N	Unused	Total	%Cov	%Cov(50)	%Cov(95)	Accessions	Names	Used	Annotation	Contrib	Conf	Sequence	Modifications	Cleavages	dMass	Prec MW	Prec m/z	Theor MW	Theor m/z	Theor z	Sc	Spectrum	Specific	Time	PrecursorSignal	PrecursorElution
[truncated: 8,395 more rows]

[truncated: 1 more sheets: 2P-ZrO2]
